# Supplementary material for: Dexmedetomidine Improves Anxiety-like Behaviors in Sleep-Deprived Mice by Inhibiting the p38/MSK1/NFκB Pathway and Reducing Inflammation and Oxidative Stress
Source: MDPI journal article supplement (doi:10.3390/brainsci13071058), 2023-07-11
Supplement: s1 [file s1]

## Supplementary materials

### 1. Behavioral data for the non-target zones

In the open-field experiment, mice in the SD group spent more time in the non-target zones than mice in the CC group ( $p < 0.05$ ) (Figure S1 B). Similarly, in the elevated plus maze experiment, mice in the SD group spent significantly more time in the non-target zones than mice in the CC group ( $p < 0.01$ ) (Figure S1 D). The average speed in the non-target zones did not change significantly (Figure S1 A, C). After adding Dexmedetomidine (Dex), in the open-field experiment, SD mice spent more time in the non-target zones than CC mice ( $p < 0.05$ ). In contrast, mice in the SD + Dex group spent less time in the non-target zones than mice in the SD + saline group ( $p < 0.05$ ) (Figure S1 F). After adding Dex, in the elevated plus maze experiment, time spent in the non-target zones was significantly higher in the SD group than in the CC group ( $p < 0.01$ ) but lower in the SD + Dex group than in the SD + saline group ( $p < 0.05$ ) (Figure S1 H). The average speed in the non-target zones did not change significantly (Figure S1 E, G).

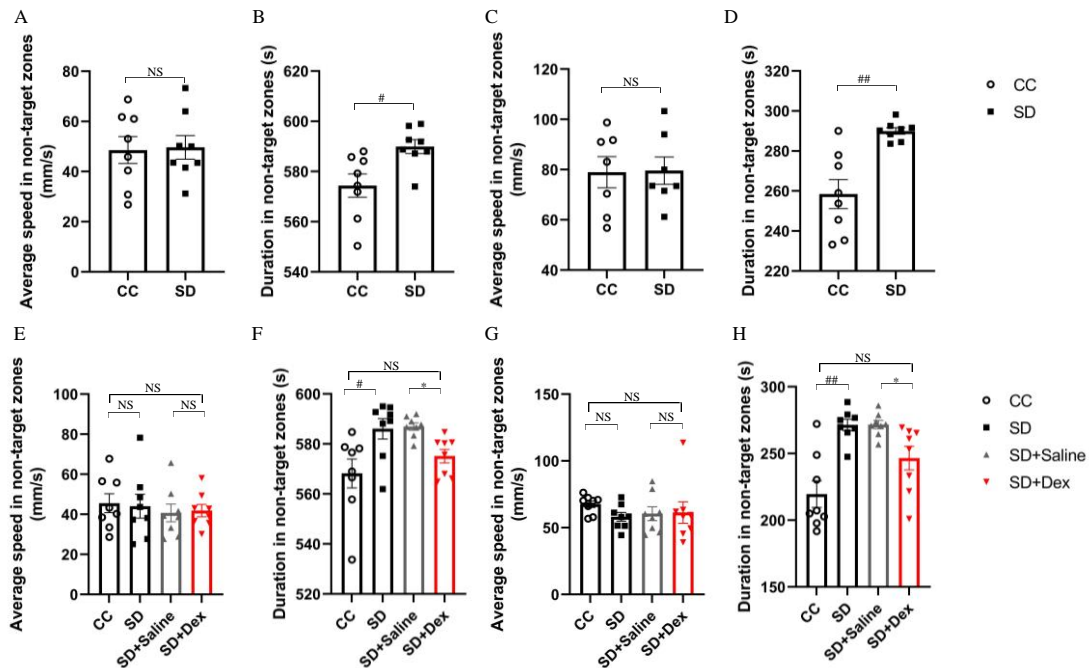

Figure S1. Information about the speeds and times spent in the non-target zones. (A,E) Average speed in the non-target zones of the open field experiment; (B,F) Duration in the non-target zones of the open field experiment; (C,G) Average speed in the non-target zones of the elevated plus maze experiment; (D,H) Duration in the non-target zones of the elevated plus maze experiment. Data shown are mean  $\pm$  SEM. ##  $p < 0.01$  vs. CC; #  $p < 0.05$  vs. CC; \*  $p < 0.05$  vs. SD + saline; NS, no significance.

### 2. Effect of SB203580 on anxiety-like behaviors in sleep-deprived mice

In the open-field experiment [ $F=3.891$ ], SD mice spent less time in the central square than CC mice ( $p < 0.05$ ). There was no significant difference in the time spent in the central square between the SD + SB203580 group and the SD + Vehicle group

mice ( $P>0.05$ ). In the elevated plus maze experiment [ $F=3.225$ ], time spent in the open arms was significantly lower in the SD group than in the CC group ( $p < 0.05$ ). There was no significant difference in the time spent in the open arms between the SD + SB203580 group and the SD + Vehicle group mice ( $P>0.05$ ).

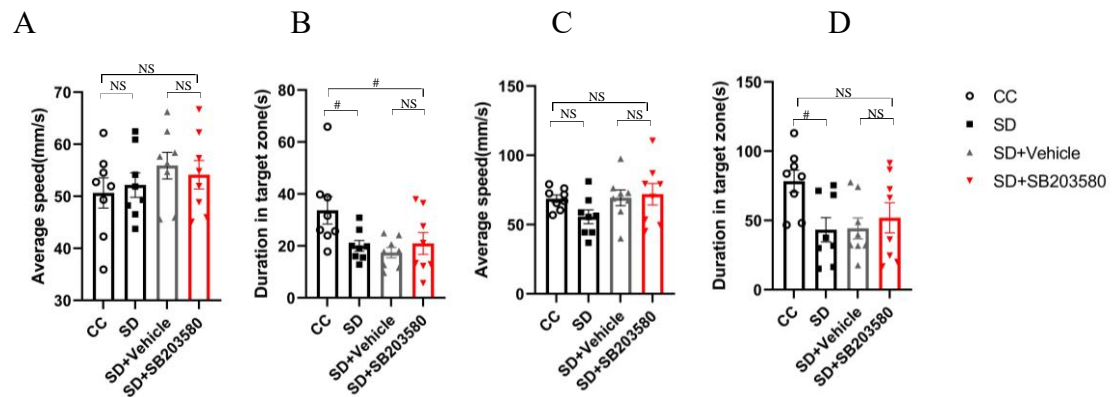

Figure S2. (A,B) Results of the open-field test. (C,D) Results of the elevated plus maze test. #  $p < 0.05$  vs. CC; NS, no significance.
