# Supplementary material for: Dexmedetomidine Improves Anxiety-like Behaviors in Sleep-Deprived Mice by Inhibiting the p38/MSK1/NFκB Pathway and Reducing Inflammation and Oxidative Stress
Source: Brain Sci. 2023 Jul 11;13(7):1058. doi: 10.3390/brainsci13071058 (PMC10377202; doi:10.3390/brainsci13071058)
Supplement: Supplementary file 1 [file brainsci-13-01058-s001.zip › supplementary material.xls]

Gene_ID	Symbol	description	CC_1	CC_2	CC_3	CC_4	SD_1	SD_2	SD_3	SD_4	G1	G2	G2_vs_G1_log2FoldChange	G2_vs_G1_Pvalue	G2_vs_G1_FDR
ENSMUSG00000028180	Zranb2	zinc finger, RAN-binding domain containing 2	11.61499333	11.23462289	11.53887388	11.45260306	11.22856143	11.27989495	11.41228007	11.57178075	11.46027329	11.3731293	-0.08714399	0.409374863	0.928658085
ENSMUSG00000028182	Lrriq3	leucine-rich repeats and IQ motif containing 3	4.894227342	2.8716894	3.80541029	3.070993449	3.328209112	2.587621499	2.115933218	3.159462173	3.66058012	2.797806501	-0.86277362	0.080296616	0.468568189
ENSMUSG00000028185	Dnase2b	deoxyribonuclease II beta	0	0	0	0	0	3.090278098	0	0	0	0.772569525	0.772569525	0.304105139	0.852874431
ENSMUSG00000028184	Adgrl2	adhesion G protein-coupled receptor L2	11.90775054	11.77259782	11.9620545	11.6525829	11.12006506	12.20628259	11.65736502	11.23911935	11.82374644	11.55570801	-0.268038434	0.268519017	0.81227932
ENSMUSG00000028187	Rpf1	ribosome production factor 1 homolog	8.460415397	7.93865673	8.095945404	8.337986941	8.407836066	8.299331532	8.146381337	7.889140248	8.208251118	8.185672296	-0.022578822	0.88694476	0.984176248
ENSMUSG00000028186	Uox	urate oxidase	5.257491152	4.463626252	3.892055946	3.242017635	3.465775941	3.925812223	3.134381001	4.796001121	4.213797746	3.830492571	-0.383305175	0.411194688	0.930581529
ENSMUSG00000028189	Ctbs	chitobiase, di-N-acetyl-	7.589355391	7.597949226	7.618991364	7.489784409	7.76849638	8.003177762	7.619383089	8.173139942	7.574020097	7.891049293	0.317029196	0.027153469	0.254998159
ENSMUSG00000028188	Spata1	spermatogenesis associated 1	5.921350221	5.282265739	4.444258039	4.600995203	4.398963161	5.78885735	5.277735714	5.821321408	5.062217301	5.321719409	0.259502108	0.535467248	0.965516704
ENSMUSG00000035429	Ptprh	protein tyrosine phosphatase, receptor type, H	4.172313377	5.430556792	5.189104527	4.936123083	4.254538354	5.032839998	3.949570471	4.689118391	4.932024445	4.481516804	-0.450507641	0.225451846	0.753425125
ENSMUSG00000020755	Sap30bp	SAP30 binding protein	10.20495657	10.37393358	10.50926445	10.39027048	10.18563607	10.42507739	10.38968585	10.31802949	10.36960627	10.3296072	-0.039999067	0.656067159	0.969741274
ENSMUSG00000070077	Mir491	microRNA 491	1.04569736	1.635246308	0	1.040994419	0	0.875920088	0	0.994123999	0.930484522	0.467511022	-0.4629735	0.60724978	0.969741274
ENSMUSG00000020752	Recql5	RecQ protein-like 5	9.583726029	9.67831607	9.548270483	9.576602203	9.661604616	9.852852483	9.903971931	9.787518859	9.596728696	9.801486972	0.204758276	0.01801596	0.195935075
ENSMUSG00000020758	Itgb4	integrin beta 4	8.313701451	8.373760042	7.429206469	7.881403335	9.373288891	9.149965378	7.965733346	9.081002764	7.999517824	8.892497595	0.89297977	0.009047229	0.127725579
ENSMUSG00000069833	Ahnak	AHNAK nucleoprotein (desmoyokin)	10.03680947	10.25338537	9.951522247	10.17354122	9.860279254	9.823897518	9.864950267	9.844662251	10.10381458	9.848447322	-0.255367254	0.003734792	0.070347942
ENSMUSG00000069830	Nlrp1a	NLR family, pyrin domain containing 1A	0	3.527574467	1.449333651	2.061062922	0	2.587621499	2.115933218	0	1.75949276	1.175888679	-0.583604081	0.534448988	0.965516704
ENSMUSG00000028238	Atp6v0d2	ATPase, H+ transporting, lysosomal V0 subunit D2	2.068014459	2.05644782	0	0	0	0	0	1.991176999	1.03111557	0.49779425	-0.53332132	0.636541404	0.969741274
ENSMUSG00000033862	Cdk10	cyclin-dependent kinase 10	10.39826181	10.30354136	10.34715164	10.52891611	10.17689618	10.17185956	10.27010863	10.21223553	10.39446773	10.20777497	-0.186692756	0.017958941	0.19539534
ENSMUSG00000033863	Klf9	Kruppel-like factor 9	13.54364028	13.31467269	13.36878395	13.20948612	12.65757916	13.06577008	12.63487434	12.39389948	13.35914576	12.68803077	-0.671114994	9.48E-07	0.000132659
ENSMUSG00000033860	Fgg	fibrinogen gamma chain	6.761561358	5.320791791	2.157573411	0	0	0	1.688464829	4.988593426	3.55998164	1.669264564	-1.890717076	0.358150121	0.900428226
ENSMUSG00000069835	Sat2	spermidine/spermine N1-acetyl transferase 2	6.87055797	6.802016162	7.141558804	6.987091268	7.292334823	7.378210444	7.301322887	7.464023824	6.950306051	7.358972995	0.408666944	0.008945548	0.126871143
ENSMUSG00000028233	Tgs1	trimethylguanosine synthase 1	10.07289895	9.821212879	9.830587049	9.436087131	9.677624932	9.797060832	9.774463914	9.716158365	9.790196503	9.741327011	-0.048869492	0.597853481	0.969741274
ENSMUSG00000028232	Tmem68	transmembrane protein 68	9.969482219	9.940438558	9.72979282	9.49859364	9.916863071	9.831852134	9.988487785	9.507876329	9.784576809	9.81126983	0.02669302	0.847325208	0.973353259
ENSMUSG00000028234	Rps20	ribosomal protein S20	10.30302231	10.58846115	10.47721586	10.6844319	11.16810607	10.54040647	10.57875538	10.83919852	10.5132828	10.78161661	0.268333806	0.042844229	0.332746419
ENSMUSG00000114977	---	---	0	0	0	0	3.006106913	0	0	0	0	0.751526728	0.751526728	0.334498591	0.877914407
ENSMUSG00000114970	---	---	3.667665513	1.635246308	1.846484642	2.652653363	0	2.37180711	1.688464829	2.575155827	2.450512456	1.658856941	-0.791655515	0.352831302	0.894555786
ENSMUSG00000044534	Ackr2	atypical chemokine receptor 2	5.257491152	4.772417384	5.154468919	4.721563563	4.466092426	3.925812223	5.704100511	4.310743152	4.976485255	4.601687078	-0.374798177	0.552067546	0.965516704
ENSMUSG00000068122	Agtr2	angiotensin II receptor, type 2	4.407550957	3.876923321	3.80541029	5.078396742	3.465775941	4.451504748	4.231515646	3.796423229	4.292070328	3.986304891	-0.305765437	0.429622501	0.939803016
ENSMUSG00000068120	Gm10231	predicted pseudogene 10231	7.769046051	7.822637243	7.879742295	7.999394363	7.984229526	7.916066323	7.95284628	7.976955205	7.867704988	7.957524333	0.089819345	0.468071096	0.958562956
ENSMUSG00000075166	Olfr1104	olfactory receptor 1104	0	0	0	0	0	0	1.078314528	0	0	0.269578632	0.269578632	0.846512451	0.973353259
ENSMUSG00000027400	Pdyn	prodynorphin	9.914854136	9.511389776	9.748782544	9.708290561	11.19246916	10.3605565	10.21989527	9.488086185	9.720829254	10.31525178	0.594422525	0.04901127	0.356008699
ENSMUSG00000027403	Tgm6	transglutaminase 6	0	2.05644782	0	0	1.58961773	3.090278098	0	3.796423229	0.514111955	2.119079764	1.604967809	0.06410934	0.416767665
ENSMUSG00000075168	Olfr1099	olfactory receptor 1099	0	0	0	0	0	0	2.445268757	0	0	0.611317189	0.611317189	0.456371897	0.956861716
ENSMUSG00000073730	4933415F23Rik	RIKEN cDNA 4933415F23 gene	0	0	1.846484642	0	0	1.809634363	0	0	0.46162116	0.452408591	-0.00921257	0.988231408	0.9978586
ENSMUSG00000018209	Stk4	serine/threonine kinase 4	10.64548139	10.59829585	10.57948426	10.48167736	10.30732426	10.66288688	10.28817643	10.45787412	10.57623471	10.42906543	-0.147169288	0.161307845	0.652591432
ENSMUSG00000044288	Cnr1	cannabinoid receptor 1 (brain)	12.39061285	12.42598478	12.66242735	12.04337095	12.58841208	12.92537154	12.38768254	12.34412786	12.38059898	12.56139851	0.180799524	0.214399719	0.738254321
ENSMUSG00000083761	Pgam1-ps1	phosphoglycerate mutase 1, pseudogene 1	0	1.635246308	0	0	0	0.875920088	0	0	0.408811577	0.218980022	-0.189831555	0.816860842	0.973353259
ENSMUSG00000044285	Gm1821	predicted gene 1821	11.42478974	11.4492521	11.63386624	11.54588444	11.69128542	11.68237608	11.57775911	11.48108269	11.51344813	11.60812582	0.094677695	0.248442333	0.784865329
ENSMUSG00000044286	Olfr221	olfactory receptor 221	0	0	1.449333651	2.061062922	0	1.417032207	2.713220414	0.994123999	0.877599143	1.281094155	0.403495012	0.660982421	0.969741274
ENSMUSG00000044287	Nrn1l	neuritin 1-like	3.783704699	4.772417384	5.006959543	5.288182697	4.094030572	4.877550687	4.231515646	3.796423229	4.712816081	4.249880034	-0.462936047	0.218576562	0.74357496
ENSMUSG00000006958	Chrd	chordin	11.02437505	11.3220876	11.12581498	11.47957066	10.48877179	10.46739333	10.79636155	10.97975162	11.23796207	10.68306957	-0.554892499	4.73E-05	0.002872701
ENSMUSG00000087575	Gm12976	predicted gene 12976	0	0	1.449333651	2.386971434	2.32751257	0	0	0	0.959076271	0.581878143	-0.377198129	0.798852122	0.973353259
ENSMUSG00000087574	C030037D09Rik	RIKEN cDNA C030037D09 gene	7.644116309	6.516888973	6.759032935	7.102618913	7.889590779	7.529346092	7.500435386	8.070416639	7.005664282	7.747447224	0.741782942	0.002882843	0.059191694
ENSMUSG00000087571	Gm15202	predicted gene 15202	0	3.06564474	0.899492338	0	0	1.417032207	0	0	0.991284269	0.354258052	-0.637026218	0.359463401	0.900967805
ENSMUSG00000087579	Hectd2os	Hectd2, opposite strand	6.019298013	5.465364584	2.986096998	3.982495002	3.328209112	4.33693292	4.049800494	2.575155827	4.613313649	3.572524588	-1.040789061	0.025985518	0.247747229
ENSMUSG00000087578	Ccdc142os	coiled-coil domain containing 142, opposite strand	3.667665513	4.393062975	3.892055946	4.075933197	5.591794709	4.505549955	4.902110306	5.414763677	4.007179408	5.103554661	1.096375254	0.002174206	0.048668067
ENSMUSG00000058569	Tmed9	transmembrane p24 trafficking protein 9	10.66547366	10.88451093	10.93557481	10.96269313	10.88885224	10.87855391	10.82493248	10.83215145	10.86206313	10.85612252	-0.00594061	0.900686788	0.989082497
ENSMUSG00000058567	Gm2531	predicted gene 2531	1.04569736	0	0	0	0	0	0	0	0.26142434	0	-0.26142434	0.830018289	0.973353259
ENSMUSG00000021583	Erap1	endoplasmic reticulum aminopeptidase 1	8.532684364	7.80915083	7.96715664	7.981393855	7.679368445	7.741267543	8.163261761	8.292042133	8.072596422	7.968984971	-0.103611451	0.575758089	0.969741274
ENSMUSG00000073867	AA474408	expressed sequence AA474408	5.843262585	5.201982679	5.045274768	5.72313878	5.889502295	5.972765709	5.822179139	5.743330419	5.453414703	5.85694439	0.403529687	0.1463164	0.624330575
ENSMUSG00000116538	---	---	0	0	0	1.639366891	0	0	1.688464829	0	0.409841723	0.422116207	0.012274484	0.998195122	0.999352877
ENSMUSG00000021585	Cast	calpastatin	8.867869973	8.926374689	8.643689407	8.749547861	8.324368017	8.828141924	8.346858428	8.173139942	8.796870482	8.418127078	-0.378743404	0.017267467	0.190521098
ENSMUSG00000116536	---	---	0	0	0	0	1.003492829	0	1.688464829	0	0	0.672989415	0.672989415	0.544113812	0.965516704
ENSMUSG00000116534	---	---	5.21677981	4.772417384	5.817270352	5.538499508	5.530387859	5.139236278	4.669848268	5.632316622	5.336241763	5.242947257	-0.093294507	0.753324752	0.973353259
ENSMUSG00000021589	Rhobtb3	Rho-related BTB domain containing 3	9.495004368	9.449713072	9.115985332	9.409408721	9.561556819	9.481955363	9.469781499	9.849323587	9.367527873	9.590654317	0.223126443	0.064744724	0.418774385
ENSMUSG00000104900	4930596I21Rik	RIKEN cDNA 4930596I21 gene	1.04569736	0	0	0	1.003492829	0	1.078314528	0	0.26142434	0.520451839	0.259027499	0.831224128	0.973353259
ENSMUSG00000104901	Gm42692	predicted gene 42692	3.403168963	4.879533179	4.051143259	4.324639127	3.465775941	3.567705506	4.049800494	4.310743152	4.164621132	3.848506273	-0.316114859	0.393275569	0.92467267
ENSMUSG00000118555	---	---	3.250190284	0	0	0	1.003492829	2.775313294	2.445268757	2.312514971	0.812547571	2.134147463	1.321599892	0.539379125	0.965516704
ENSMUSG00000022085	Pebp4	phosphatidylethanolamine binding protein 4	1.645576219	0	0	0	0	0	0	0	0.411394055	0	-0.411394055	0.662772563	0.969741274
ENSMUSG00000081343	Gm16071	predicted gene 16071	0	1.635246308	0	0	2.005236078	0.875920088	2.115933218	0	0.408811577	1.249272346	0.840460769	0.387047049	0.919136247
ENSMUSG00000115357	---	---	0	1.037876205	1.449333651	1.040994419	0	0	3.30634127	0.994123999	0.882051069	1.075116317	0.193065248	0.45095179	0.955408935
ENSMUSG00000097309	Gm17249	predicted gene, 17249	4.084528611	3.389405204	3.394994784	3.775234473	4.913635787	5.300789739	5.054651607	5.380822891	3.661040768	5.162475006	1.501434238	2.24E-05	0.001634711
ENSMUSG00000097264	Rpl31-ps24	ribosomal protein L31, pseudogene 24	0	0	0	0	0	0	0	1.991176999	0	0.49779425	0.49779425	0.56486706	0.965516704
ENSMUSG00000030889	Vwa3a	von Willebrand factor A domain containing 3A	7.187386724	7.767918247	7.554039626	7.157089108	7.538321059	7.516242347	7.879833127	7.895163829	7.416608426	7.70739009	0.290781664	0.124162131	0.577902483
ENSMUSG00000030888	Rrp8	ribosomal RNA processing 8, methyltransferase, homolog (yeast)	8.213800168	7.999295963	8.338949053	8.209858249	7.693443962	7.201204215	7.370792228	8.070416639	8.190475859	7.583964261	-0.606511598	0.001844283	0.043191142
ENSMUSG00000086191	Zfp652os	zinc finger protein 652, opposite strand	5.131739574	6.004325519	5.189104527	5.326712852	5.788210379	5.104635417	6.194794333	6.32821994	5.412970618	5.853965017	0.440994399	0.146801516	0.624647789
ENSMUSG00000086196	Gm13571	predicted gene 13571	2.068014459	0	0	0	4.006542134	1.809634363	0	1.577122502	0.517003615	1.84832475	1.331321135	0.105934971	0.536158655
ENSMUSG00000086194	Gm16329	predicted gene 16329	0	1.635246308	0	0	0	0	0	0	0.408811577	0	-0.408811577	0.662772563	0.969741274
ENSMUSG00000030881	Arfip2	ADP-ribosylation factor interacting protein 2	11.09276409	10.71678949	10.7837952	10.63347283	10.38526685	10.66065556	10.45512014	10.51473122	10.8067054	10.50394344	-0.30276196	0.005764606	0.094750891
ENSMUSG00000026753	Ppp6c	protein phosphatase 6, catalytic subunit	10.8356151	10.57756498	10.7645462	10.47418808	10.38851496	10.68939697	10.62822761	10.56282525	10.66297859	10.56724119	-0.095737397	0.34755569	0.890553288
ENSMUSG00000026750	Psmb7	proteasome (prosome, macropain) subunit, beta type 7	10.67864957	10.86346054	10.98260997	10.70560174	11.03626112	10.74240639	10.65333781	10.53512633	10.80758046	10.74178291	-0.065797543	0.61673366	0.969741274
ENSMUSG00000026751	Nr5a1	nuclear receptor subfamily 5, group A, member 1	2.068014459	0	3.135647341	0	2.32751257	1.809634363	3.459970513	2.575155827	1.30091545	2.543068318	1.242152868	0.397358318	0.925901209
ENSMUSG00000030884	Uqcrc2	ubiquinol cytochrome c reductase core protein 2	11.8157581	11.91199718	12.09813045	11.79034727	11.81271915	11.98279324	11.88895536	11.71188841	11.90405825	11.84908904	-0.05496921	0.546315688	0.965516704
ENSMUSG00000026754	Golga1	golgi autoantigen, golgin subfamily a, 1	10.0426448	9.216761465	9.747330638	9.863765042	9.710872451	9.347851091	10.01971956	9.488086185	9.717625485	9.641632322	-0.075993163	0.629546853	0.969741274
ENSMUSG00000026755	Arpc5l	actin related protein 2/3 complex, subunit 5-like	10.80675921	10.90525859	10.8448075	10.86299063	10.83193213	10.75361621	10.81161028	10.68258899	10.85495398	10.7699369	-0.085017081	0.223897917	0.751664023
ENSMUSG00000007338	Mrpl49	mitochondrial ribosomal protein L49	9.325861091	9.523827782	9.671276211	9.384512414	9.590050916	9.624627577	9.597402946	9.52739867	9.476369374	9.584870027	0.108500653	0.305715566	0.853930773
ENSMUSG00000059213	Ddn	dendrin	14.81790883	14.95407704	14.89331377	15.00260153	15.41799144	15.20811782	15.24344845	15.36787336	14.91697529	15.30935777	0.392382478	8.28E-06	0.000730234
ENSMUSG00000115355	---	---	0	2.05644782	2.157573411	0	0	0	2.115933218	0	1.053505308	0.528983305	-0.524522003	0.642297722	0.969741274
ENSMUSG00000074846	Gm10774	predicted pseudogene 10774	4.172313377	4.772417384	3.973791331	1.040994419	4.913635787	0.875920088	4.669848268	4.632553048	3.489879128	3.772989298	0.28311017	0.610228059	0.969741274
ENSMUSG00000075832	Gm22004	predicted gene, 22004	0	0	0.899492338	0	0	0.875920088	0	0	0.224873085	0.218980022	-0.005893063	0.991579818	0.9978586
ENSMUSG00000115354	---	---	3.079044871	0	0	2.386971434	3.813834889	4.002991028	3.841853679	2.797267076	1.366504076	3.613986668	2.247482592	0.017386239	0.191236642
ENSMUSG00000090996	Gm20458	predicted gene 20458	0	3.527574467	2.157573411	4.398847215	0	0	3.30634127	1.991176999	2.520998773	1.324379567	-1.196619206	0.21592939	0.740067863
ENSMUSG00000086224	2700069I18Rik	RIKEN cDNA 2700069I18 gene	4.172313377	3.389405204	3.509051426	3.775234473	5.136061358	0	4.605430475	3.689572954	3.71150112	3.357766197	-0.353734923	0.519426777	0.965516704
ENSMUSG00000086228	Ubap1l	ubiquitin-associated protein 1-like	6.883621272	7.039984542	6.912009148	7.347131941	6.115400801	6.612951935	6.417500623	6.743220948	7.045686726	6.472268577	-0.573418149	0.004585462	0.080280356
ENSMUSG00000003824	Syce2	synaptonemal complex central element protein 2	5.579904661	5.320791791	5.118981298	4.324639127	4.650554971	4.505549955	5.102113538	5.895311619	5.086079219	5.038382521	-0.047696698	0.974599757	0.9978586
ENSMUSG00000081643	Gm11605	predicted gene 11605	4.894227342	5.430556792	5.006959543	4.885399987	6.156626306	4.793151955	5.277735714	4.796001121	5.054285916	5.255878774	0.201592858	0.406374114	0.926731565
ENSMUSG00000081640	Rplp0-ps1	ribosomal protein, large, P0, pseudogene 1	1.04569736	1.635246308	1.846484642	1.639366891	0	0	1.078314528	0	1.5416988	0.269578632	-1.272120168	0.13309062	0.596748502
ENSMUSG00000081647	Gm13022	predicted gene 13022	0	0	0	2.386971434	0	0	0	0	0.596742858	0	-0.596742858	0.461430773	0.956861716
ENSMUSG00000081646	Gm15060	predicted gene 15060	0	0	0	0	1.003492829	0	0	0	0	0.250873207	0.250873207	0.846512451	0.973353259
ENSMUSG00000081648	Gm13423	predicted gene 13423	3.250190284	2.8716894	2.630511888	3.775234473	3.706881428	3.090278098	2.939114924	2.312514971	3.131906511	3.012197355	-0.119709156	0.864892232	0.977320391
ENSMUSG00000094678	Olfr857	olfactory receptor 857	0	1.635246308	0	0	2.005236078	0	0	0	0.408811577	0.50130902	0.092497443	0.876180349	0.98106821
ENSMUSG00000085555	2610035F20Rik	RIKEN cDNA 2610035F20 gene	4.99397117	4.979242675	3.61474788	5.326712852	4.76160691	3.348651568	4.902110306	4.988593426	4.728668644	4.500240553	-0.228428092	0.605766638	0.969741274
ENSMUSG00000004446	Bid	BH3 interacting domain death agonist	6.959610452	7.293462723	7.858380949	7.506663608	7.245335866	7.567957997	7.845383123	7.907136064	7.404529433	7.641453263	0.23692383	0.298868641	0.847989958
ENSMUSG00000098550	Mir7079	microRNA 7079	1.04569736	1.037876205	0.899492338	1.040994419	1.003492829	0.875920088	1.078314528	0.994123999	1.00601508	0.987962861	-0.018052219	0.981393144	0.9978586
ENSMUSG00000098557	Kctd12	potassium channel tetramerisation domain containing 12	11.35381213	11.39668303	11.57410724	11.27926767	11.77060257	11.43285732	11.83247161	11.65622614	11.40096752	11.67303941	0.272071894	0.008246898	0.120256273
ENSMUSG00000028937	Acot7	acyl-CoA thioesterase 7	12.16945621	12.45658304	12.62536389	12.35142751	12.64586451	12.54835527	12.59551336	12.20315264	12.40070766	12.49822145	0.097513782	0.417369244	0.934185981
ENSMUSG00000089416	Gm22116	predicted gene, 22116	2.068014459	0	0	0	0	0	0	0	0.517003615	0	-0.517003615	0.539180863	0.965516704
ENSMUSG00000089417	Gm22009	predicted gene, 22009	3.667665513	0	0.899492338	0	2.005236078	0	0	0	1.141789463	0.50130902	-0.640480443	0.320697991	0.864730519
ENSMUSG00000089410	Gm22014	predicted gene, 22014	0	0	0	0	1.58961773	0	0	1.577122502	0	0.791685058	0.791685058	0.482429853	0.964147298
ENSMUSG00000047161	Chst9	carbohydrate (N-acetylgalactosamine 4-0) sulfotransferase 9	0	0	0	2.652653363	3.006106913	2.775313294	3.725440712	2.575155827	0.663163341	3.020504187	2.357340846	0.024936658	0.240684094
ENSMUSG00000085885	Gm11906	predicted gene 11906	2.068014459	0	0	0	0	1.809634363	0	0	0.517003615	0.452408591	-0.064595024	0.923833111	0.997252381
ENSMUSG00000085887	Arhgap27os3	Rho GTPase activating protein 27, opposite strand 3	0	3.06564474	1.846484642	2.876933903	2.32751257	3.22524116	3.134381001	2.575155827	1.947265821	2.81557264	0.868306819	0.45036726	0.955408935
ENSMUSG00000085886	D030047H15Rik	RIKEN cDNA D030047H15 gene	8.451670162	8.382892513	8.28393101	8.919888181	8.151610871	8.413278808	8.390521046	8.173139942	8.509595467	8.282137667	-0.2274578	0.116734894	0.562102549
ENSMUSG00000085881	Gm15912	predicted gene 15912	6.674045027	6.774522197	6.891123696	6.887508768	6.901736495	7.273075444	6.851642577	7.065127148	6.806799922	7.022895416	0.216095494	0.187139119	0.695714594
ENSMUSG00000085882	2610507I01Rik	RIKEN cDNA 2610507I01 gene	7.498869241	7.475231541	7.227379384	7.178314101	7.686423369	7.280844529	7.491551747	7.439502644	7.344948567	7.474580572	0.129632006	0.407855829	0.927431771
ENSMUSG00000085889	1700054M17Rik	RIKEN cDNA 1700054M17 gene	0	0	0	0	0	1.809634363	0	1.991176999	0	0.95020284	0.95020284	0.352945977	0.894555786
ENSMUSG00000085888	Gm12224	predicted gene 12224	2.66033993	3.06564474	1.449333651	3.242017635	3.176128642	2.37180711	3.841853679	3.574171483	2.604333989	3.240990228	0.636656239	0.318261416	0.862239382
ENSMUSG00000029919	Hpgds	hematopoietic prostaglandin D synthase	8.06118752	7.774872701	7.586880989	7.393244418	7.679368445	8.133320344	8.207333828	8.546676044	7.704046407	8.141674665	0.437628258	0.022070531	0.223583989
ENSMUSG00000029918	Mrps33	mitochondrial ribosomal protein S33	8.996700416	9.046181772	9.05391502	9.149487931	9.292368287	9.222353384	8.900451926	9.027165435	9.061571285	9.110584758	0.049013473	0.602375038	0.969741274
ENSMUSG00000100172	Gm4412	predicted gene 4412	0	0	0	0	0	0	1.688464829	0	0	0.422116207	0.422116207	0.668370292	0.969741274
ENSMUSG00000029915	Clec5a	C-type lectin domain family 5, member a	5.21677981	5.026626884	4.885501747	2.652653363	5.814207847	5.331037707	6.080957431	6.363405852	4.445390451	5.897402209	1.452011758	0.002988239	0.06065124
ENSMUSG00000029917	C130060K24Rik	RIKEN cDNA C130060K24 gene	3.991054272	1.635246308	1.846484642	0	4.006542134	5.17302669	4.14351718	3.311334	1.868196305	4.158605001	2.290408696	0.012622069	0.15604045
ENSMUSG00000029916	Agk	acylglycerol kinase	9.792059535	9.71674388	9.932483287	9.765509163	9.775153566	9.944968212	9.695433568	9.552389076	9.801698966	9.741986106	-0.05971286	0.600815468	0.969741274
ENSMUSG00000029911	Ssbp1	single-stranded DNA binding protein 1	8.744411117	8.140600633	8.391945798	8.556368626	8.416347687	8.351908589	8.469554481	8.632109717	8.458331543	8.467480119	0.009148575	0.978345492	0.9978586
ENSMUSG00000029910	Mad2l1	MAD2 mitotic arrest deficient-like 1	8.05542686	7.894639858	7.705274832	8.052086333	7.883464551	7.677955377	7.58638684	8.021692098	7.926856971	7.792374717	-0.134482254	0.383491555	0.915367094
ENSMUSG00000029913	Prdm5	PR domain containing 5	6.088627781	5.801328139	5.923939562	6.308625971	6.310669862	6.266809174	5.877781601	6.363405852	6.030630363	6.204666622	0.174036259	0.416218371	0.934088832
ENSMUSG00000077549	Snord71	small nucleolar RNA, C/D box 71	0	1.635246308	0.899492338	1.639366891	0	0	0	1.577122502	1.043526384	0.394280625	-0.649245759	0.55271987	0.965516704
ENSMUSG00000070527	Mkrn3	makorin, ring finger protein, 3	4.99397117	4.530898564	5.288285325	4.721563563	5.399128913	5.552585985	5.877781601	5.158477381	4.883679656	5.49699347	0.613313814	0.043720057	0.336005653
ENSMUSG00000077545	Gm22018	predicted gene, 22018	0	0	1.449333651	0	1.003492829	0.875920088	0	0.994123999	0.362333413	0.718384229	0.356050816	0.829028572	0.973353259
ENSMUSG00000077547	Gm22019	predicted gene, 22019	0	0	0	0	0	0	0	0.994123999	0	0.248531	0.248531	0.846512451	0.973353259
ENSMUSG00000095108	Gm17467	predicted gene, 17467	0	0	0	0	0	0.875920088	0	0	0	0.218980022	0.218980022	0.846512451	0.973353259
ENSMUSG00000084686	Gm22027	predicted gene, 22027	1.04569736	2.64754811	1.449333651	3.070993449	3.176128642	2.587621499	3.459970513	2.575155827	2.053393143	2.94971912	0.896325977	0.270968846	0.815194614
ENSMUSG00000095101	Gm13285	predicted gene 13285	0	0	0.899492338	0	0	0	0	0.994123999	0.224873085	0.248531	0.023657915	0.991579818	0.9978586
ENSMUSG00000006179	Prss16	protease, serine 16 (thymus)	5.04137088	5.565016072	5.749265467	5.326712852	3.591359576	4.917967956	3.459970513	4.310743152	5.420591318	4.070010299	-1.350581019	0.00089424	0.025878636
ENSMUSG00000095105	Edaradd	EDAR (ectodysplasin-A receptor)-associated death domain	3.079044871	2.382061721	3.973791331	3.394899473	4.254538354	2.775313294	2.713220414	4.689118391	3.207449349	3.608047613	0.400598264	0.358141277	0.900428226
ENSMUSG00000095107	Vmn2r-ps10	vomeronasal 2, receptor, pseudogene 10	0	0	0	0	0	0	0	1.577122502	0	0.394280625	0.394280625	0.681264798	0.969741274
ENSMUSG00000115111	---	---	0	0	1.846484642	0	0	2.117931851	1.688464829	0.994123999	0.46162116	1.20013017	0.738509009	0.532252169	0.965516704
ENSMUSG00000098081	Gm26913	predicted gene, 26913	0	0	0	1.639366891	0	0	0	0	0.409841723	0	-0.409841723	0.662772563	0.969741274
ENSMUSG00000098080	Gm5732	predicted gene 5732	0	0	0	0	1.003492829	0	0	0	0	0.250873207	0.250873207	0.846512451	0.973353259
ENSMUSG00000098087	Gm17750	predicted gene, 17750	4.47814862	4.24065392	3.71322647	4.163686085	5.498675636	3.348651568	3.30634127	4.310743152	4.148928774	4.116102907	-0.032825867	0.636893788	0.969741274
ENSMUSG00000035273	Hpse	heparanase	6.25870438	6.073644229	5.944358618	5.962165776	5.136061358	5.300789739	5.005574998	5.23646261	6.059718251	5.169722176	-0.889996074	0.000185767	0.008078571
ENSMUSG00000043263	Ifi209	interferon activated gene 209	3.667665513	2.05644782	2.986096998	3.394899473	1.003492829	2.775313294	3.30634127	3.448730115	3.026277451	2.633469377	-0.392808074	0.687708082	0.969741274
ENSMUSG00000043262	Uevld	UEV and lactate/malate dehyrogenase domains	8.871153008	8.761107029	8.794707115	8.907231367	8.801377413	8.7265592	8.740934342	8.858613951	8.83354963	8.781871226	-0.051678403	0.590196812	0.969741274
ENSMUSG00000043267	Olfr1031	olfactory receptor 1031	0	1.037876205	0	0	0	0	0	0	0.259469051	0	-0.259469051	0.830018289	0.973353259
ENSMUSG00000080590	Gm22029	predicted gene, 22029	1.04569736	1.037876205	0.899492338	0	0	1.809634363	0	0	0.745766476	0.452408591	-0.293357885	0.936434949	0.9978586
ENSMUSG00000080597	Gm22033	predicted gene, 22033	0	0	0	0	0	0.875920088	0	0	0	0.218980022	0.218980022	0.846512451	0.973353259
ENSMUSG00000108627	Gm45079	predicted gene 45079	0	1.037876205	0	0	0	0	0	1.577122502	0.259469051	0.394280625	0.134811574	0.836646014	0.973353259
ENSMUSG00000035279	Ssc5d	scavenger receptor cysteine rich family, 5 domains	7.573319894	7.23414501	7.159136195	7.279993422	7.65079861	7.265264295	7.464567824	7.447722767	7.31164863	7.457088374	0.145439744	0.366211501	0.905902412
ENSMUSG00000035278	Plekhj1	pleckstrin homology domain containing, family J member 1	8.561421027	8.885192715	8.833539636	9.046483101	8.820742947	9.06027342	9.250363686	9.214655899	8.831659119	9.086508988	0.254849869	0.059270002	0.398943147
ENSMUSG00000031609	Sap30	sin3 associated polypeptide	6.857375301	7.981370306	7.618991364	7.787838942	6.788273659	7.099442832	6.932638589	6.573309631	7.561393978	6.848416178	-0.7129778	0.000947262	0.027045268
ENSMUSG00000000125	Wnt3	wingless-type MMTV integration site family, member 3	5.409736973	6.688749398	5.350809624	5.86078542	6.788273659	6.047536045	5.764347519	6.617700018	5.827520354	6.30446431	0.476943956	0.192278294	0.704649376
ENSMUSG00000044533	Rps2	ribosomal protein S2	12.20273717	12.27627927	12.15234453	12.41371658	12.68359442	12.48692147	12.472804	12.49180332	12.26126939	12.5337808	0.272511415	0.001532301	0.037621912
ENSMUSG00000034435	Tmem30b	transmembrane protein 30B	0	3.236588011	0	0	0	0	2.713220414	2.575155827	0.809147003	1.32209406	0.512947057	0.869488691	0.97876255
ENSMUSG00000034437	Gm9761	predicted gene 9761	5.76070528	6.483316692	6.466078181	6.694763342	6.995607103	6.152892446	6.508380901	5.573432784	6.351215873	6.307578308	-0.043637565	0.987254412	0.9978586
ENSMUSG00000034430	Zxdc	ZXD family zinc finger C	9.425246885	9.32021604	9.678912319	9.023210764	9.18438474	9.435727499	9.115201657	9.264367443	9.361896502	9.249920334	-0.111976167	0.363938889	0.904956714
ENSMUSG00000083485	Gm12308	predicted gene 12308	2.068014459	0	0	0	1.003492829	0	1.688464829	1.577122502	0.517003615	1.06727004	0.550266425	0.73764541	0.973353259
ENSMUSG00000034438	Gbp8	guanylate-binding protein 8	0	0	2.157573411	2.652653363	3.328209112	2.941373951	4.538001383	3.159462173	1.202556693	3.491761655	2.289204961	0.007993144	0.11768504
ENSMUSG00000083481	Rps8-ps2	ribosomal protein S8, pseudogene 2	3.250190284	3.236588011	3.271140962	3.394899473	3.913403719	3.925812223	3.841853679	3.574171483	3.288204683	3.813810276	0.525605593	0.225309299	0.753425125
ENSMUSG00000023057	Fabp2	fatty acid binding protein 2, intestinal	3.667665513	0	0	0	0	0	0	0	0.916916378	0	-0.916916378	0.150109502	0.630961803
ENSMUSG00000102912	Gm20731	predicted gene, 20731	3.783704699	3.389405204	4.1944172	4.600995203	3.591359576	2.941373951	4.467265589	4.512299928	3.992130576	3.878074761	-0.114055816	0.896859505	0.988036188
ENSMUSG00000068129	Cst7	cystatin F (leukocystatin)	2.394364844	3.389405204	0	1.639366891	2.813337462	1.809634363	0	3.574171483	1.855784235	2.049285827	0.193501592	0.784027094	0.973353259
ENSMUSG00000087909	Gm22035	predicted gene, 22035	0	0	0.899492338	0	0	0	0	0	0.224873085	0	-0.224873085	0.830018289	0.973353259
ENSMUSG00000087905	Gm22037	predicted gene, 22037	0	0	0.899492338	0	0	0	0	0	0.224873085	0	-0.224873085	0.830018289	0.973353259
ENSMUSG00000087903	Gm22039	predicted gene, 22039	1.04569736	0	1.846484642	0	0	0	1.078314528	0	0.7230455	0.269578632	-0.453466868	0.576550444	0.969741274
ENSMUSG00000053914	Kdm4d	lysine (K)-specific demethylase 4D	4.333320076	4.393062975	4.261049233	3.882583475	4.913635787	3.925812223	3.949570471	4.381104338	4.21750394	4.292530705	0.075026765	0.76006487	0.973353259
ENSMUSG00000053916	Nanp	N-acetylneuraminic acid phosphatase	7.393220062	7.517307996	7.926679369	7.498248694	7.458148561	7.701300717	7.773912459	7.488135179	7.58386403	7.605374229	0.021510199	0.955632277	0.9978586
ENSMUSG00000017723	Wfdc2	WAP four-disulfide core domain 2	1.04569736	0	0	0	1.003492829	0	2.445268757	1.991176999	0.26142434	1.359984646	1.098560306	0.171830555	0.67248775
ENSMUSG00000017721	Pigt	phosphatidylinositol glycan anchor biosynthesis, class T	11.42813714	11.31076738	11.39329777	11.25199879	11.25371496	11.29435964	11.34174069	11.29599866	11.34605027	11.29645349	-0.049596783	0.458782487	0.956861716
ENSMUSG00000017720	Trp53tg5	transformation related protein 53 target 5	3.079044871	2.05644782	0.899492338	3.070993449	0	0	2.115933218	2.575155827	2.27649462	1.172772261	-1.103722358	0.314367358	0.859531382
ENSMUSG00000112981	AC122811.1	---	1.04569736	0	0	0	0	0	0	0	0.26142434	0	-0.26142434	0.830018289	0.973353259
ENSMUSG00000017724	Etv4	ets variant 4	8.589596452	8.562420418	8.279919683	8.910405996	8.861830573	8.406192819	8.785226275	8.930762505	8.585585637	8.746003043	0.160417406	0.317619965	0.861525262
ENSMUSG00000009356	Lpo	lactoperoxidase	2.66033993	4.070221307	3.135647341	4.936123083	4.254538354	3.84427012	4.049800494	4.236773674	3.700582915	4.09634566	0.395762745	0.771121009	0.973353259
ENSMUSG00000009350	Mpo	myeloperoxidase	2.884829173	2.05644782	0	0	3.006106913	0	0	0.994123999	1.235319248	1.000057728	-0.23526152	0.88956906	0.985328757
ENSMUSG00000110899	AC122305.1	---	2.068014459	4.530898564	0	0	5.761735824	3.567705506	0	1.991176999	1.649728256	2.830154582	1.180426326	0.519428636	0.965516704
ENSMUSG00000095335	Igkv3-5	immunoglobulin kappa chain variable 3-5	5.04137088	2.05644782	1.449333651	1.639366891	2.590779194	2.587621499	2.713220414	2.989701238	2.546629811	2.720330586	0.173700775	0.386453669	0.918685334
ENSMUSG00000015474	Ppt2	palmitoyl-protein thioesterase 2	9.632906455	9.39659762	9.46238632	9.644901702	9.56921044	9.68149302	9.568125609	9.517670521	9.534198024	9.584124898	0.049926874	0.606380967	0.969741274
ENSMUSG00000011267	Zfp296	zinc finger protein 296	5.971155194	6.182251265	6.042331547	5.570960747	5.530387859	5.721947949	5.641227527	5.23646261	5.941674688	5.532506486	-0.409168202	0.089518547	0.495113893
ENSMUSG00000078816	Prkcg	protein kinase C, gamma	13.07653399	13.29243058	13.74457409	12.62048639	13.1581516	13.31145781	13.47041823	13.49043523	13.18350626	13.35761572	0.174109454	0.497127987	0.965516704
ENSMUSG00000078817	Nlrp12	NLR family, pyrin domain containing 12	0	0	0	0	0	1.809634363	0	0.994123999	0	0.70093959	0.70093959	0.515489514	0.965516704
ENSMUSG00000078815	Cacng6	calcium channel, voltage-dependent, gamma subunit 6	3.667665513	2.05644782	3.892055946	3.242017635	5.591794709	4.703507358	5.005574998	4.988593426	3.214546729	5.072367623	1.857820894	4.10E-05	0.002599665
ENSMUSG00000078812	Eif5a	eukaryotic translation initiation factor 5A	12.2208644	12.3002769	12.27858022	12.2305859	12.37820804	12.26106843	12.25223943	12.19920214	12.25757686	12.27267951	0.015102652	0.808293324	0.973353259
ENSMUSG00000015478	Rnf5	ring finger protein 5	10.22690522	10.1949558	10.06776013	10.24820586	10.53640307	10.32811831	10.28432376	10.35455514	10.18445675	10.37585007	0.191393318	0.026503556	0.250693437
ENSMUSG00000078810	Gp6	glycoprotein 6 (platelet)	0	0	0	2.061062922	2.590779194	0	0	0	0.51526573	0.647694799	0.132429068	0.810812284	0.973353259
ENSMUSG00000099759	1700030C10Rik	RIKEN cDNA 1700030C10 gene	4.894227342	0	2.41333609	0	2.005236078	0.875920088	0	2.989701238	1.826890858	1.467714351	-0.359176507	0.244440832	0.779631014
ENSMUSG00000048787	Dcun1d3	DCN1, defective in cullin neddylation 1, domain containing 3 (S. cerevisiae)	8.769258884	9.266951632	9.232646763	8.878340902	8.381995689	8.650640689	9.273869391	9.207412326	9.036799545	8.878479524	-0.158320021	0.505292243	0.965516704
ENSMUSG00000099750	Gm18827	predicted gene, 18827	0	0	1.846484642	0	0	0	0	0	0.46162116	0	-0.46162116	0.592102664	0.969741274
ENSMUSG00000050296	Abca12	ATP-binding cassette, sub-family A (ABC1), member 12	2.66033993	2.382061721	1.846484642	2.652653363	0	0	1.688464829	2.797267076	2.385384914	1.121432976	-1.263951938	0.331741367	0.87629795
ENSMUSG00000027405	Nop56	NOP56 ribonucleoprotein	10.57977888	10.43557506	10.4876882	10.56964571	10.37765937	10.45628706	10.56823163	10.45787412	10.51817196	10.46501304	-0.05315892	0.493274514	0.965516704
ENSMUSG00000050295	Foxc1	forkhead box C1	8.438452101	8.135206355	7.746555545	7.957038392	8.216407074	7.865297239	8.432900957	8.472072772	8.069313098	8.246669511	0.177356412	0.331339937	0.876000026
ENSMUSG00000027404	Snrpb	small nuclear ribonucleoprotein B	10.04555363	10.54437382	10.40077717	10.64971048	10.27141416	10.12191217	10.2225821	10.03535905	10.41010378	10.16281687	-0.247286903	0.036815887	0.306271336
ENSMUSG00000093507	Gm20627	predicted gene 20627	4.671314403	4.656706109	4.606800808	3.070993449	4.913635787	4.33693292	4.392881974	4.895508649	4.251453692	4.634739833	0.383286141	0.493328114	0.965516704
ENSMUSG00000093505	Gm20691	predicted gene 20691	3.403168963	2.8716894	2.819232083	3.533121572	2.590779194	3.66590362	3.134381001	4.44819295	3.156803005	3.459814191	0.303011187	0.409164228	0.928451139
ENSMUSG00000093504	Vmn1r-ps24	vomeronasal 1 receptor, pseudogene 24	0	0	0	0	1.58961773	0	0	0	0	0.397404432	0.397404432	0.678492791	0.969741274
ENSMUSG00000093502	Gm20700	predicted gene 20700	2.66033993	3.389405204	3.135647341	0	3.328209112	2.775313294	1.688464829	2.797267076	2.296348119	2.647313578	0.350965459	0.972514748	0.9978586
ENSMUSG00000050299	Gm9843	predicted gene 9843	7.420366485	7.621288085	7.554039626	7.907058138	8.099708868	7.455756471	8.146381337	7.965550811	7.625688084	7.916849372	0.291161288	0.090702725	0.498147105
ENSMUSG00000027406	Idh3b	isocitrate dehydrogenase 3 (NAD+) beta	12.22984332	12.30688934	12.33549082	12.33498284	12.18252527	12.31692293	12.28184656	12.12841729	12.30180158	12.22742801	-0.074373564	0.302060672	0.851367914
ENSMUSG00000097619	4833422M21Rik	RIKEN cDNA 4833422M21 gene	4.841644267	4.772417384	4.842632075	4.885399987	5.006759695	5.17302669	4.847455465	5.660881138	4.835523428	5.172030747	0.336507318	0.214979506	0.739136775
ENSMUSG00000097617	Gm10687	predicted gene 10687	5.04137088	5.71718129	3.71322647	4.778268323	5.864838207	5.500306195	4.954769966	6.511914441	4.812511741	5.707957202	0.895445461	0.041941329	0.329097156
ENSMUSG00000097616	1110019D14Rik	RIKEN cDNA 1110019D14 gene	6.133063246	5.499352317	5.082598685	6.033783582	5.621545012	5.852800675	5.673006494	5.380822891	5.687199458	5.632043768	-0.05515569	0.733310325	0.973353259
ENSMUSG00000097615	Gm2061	predicted gene 2061	5.257491152	5.430556792	5.77229178	5.570960747	6.25481315	6.457110348	6.543188415	5.965691564	5.507825118	6.305200869	0.797375751	0.000749674	0.022811829
ENSMUSG00000097613	Gm17597	predicted gene, 17597	5.087262684	5.026626884	2.819232083	4.662538529	4.707149209	5.17302669	4.538001383	5.197996871	4.398915045	4.904043538	0.505128493	0.461811746	0.956861716
ENSMUSG00000097612	Gm26509	predicted gene, 26509	2.66033993	3.389405204	2.630511888	2.876933903	3.176128642	2.775313294	2.445268757	1.991176999	2.889297731	2.596971923	-0.292325808	0.661873314	0.969741274
ENSMUSG00000041138	Nme8	NME/NM23 family member 8	0	0	0	0	0	0	3.459970513	0	0	0.864992628	0.864992628	0.2040271	0.721531691
ENSMUSG00000041130	Zfp598	zinc finger protein 598	11.11508929	10.95202879	10.99734303	11.34702508	11.00908561	10.97209536	10.95260564	10.89512072	11.10287155	10.95722683	-0.145644714	0.113316062	0.554506931
ENSMUSG00000041133	Smc1a	structural maintenance of chromosomes 1A	11.36375195	11.12731714	11.25096609	11.05379675	11.03280555	11.2048023	11.05489532	10.95545613	11.19895798	11.06198983	-0.136968156	0.135090462	0.600904062
ENSMUSG00000041132	N4bp2l1	NEDD4 binding protein 2-like 1	9.946322999	9.923327296	9.902793318	9.948050637	9.814324377	9.530011125	9.726053011	9.736430565	9.930123563	9.70170477	-0.228418793	0.009497608	0.131565062
ENSMUSG00000041134	Cyyr1	cysteine and tyrosine-rich protein 1	7.959983427	7.993345458	7.831226655	8.220128577	8.0181775	8.003177762	8.3517756	8.455862918	8.001171029	8.207248445	0.206077416	0.155914433	0.642000608
ENSMUSG00000112026	AC168315.1	---	0	0	0	0	0	0	2.115933218	0	0	0.528983305	0.528983305	0.535790408	0.965516704
ENSMUSG00000112027	AC158600.1	---	2.66033993	2.8716894	3.61474788	3.394899473	3.706881428	3.462332101	3.598803161	2.312514971	3.135419171	3.270132915	0.134713744	0.752146299	0.973353259
ENSMUSG00000027409	1700020A23Rik	RIKEN cDNA 1700020A23 gene	0	4.656706109	2.41333609	3.242017635	3.328209112	4.145967774	2.713220414	3.311334	2.578014958	3.374682825	0.796667867	0.868027056	0.978404026
ENSMUSG00000016921	Srsf6	serine/arginine-rich splicing factor 6	12.23303658	12.08773942	12.00308625	12.16962628	12.16337484	12.07671741	12.24465912	12.2397088	12.12337213	12.18111504	0.057742912	0.468576089	0.958624112
ENSMUSG00000027408	Cpxm1	carboxypeptidase X 1 (M14 family)	7.532433602	7.264108708	7.457895567	7.64268241	7.734864845	7.503018491	8.022341638	7.913085129	7.474280072	7.793327526	0.319047454	0.041552017	0.327353612
ENSMUSG00000037583	Nr0b2	nuclear receptor subfamily 0, group B, member 2	2.66033993	0	0	0	0	0	0	0	0.665084982	0	-0.665084982	0.403152467	0.925901209
ENSMUSG00000014402	Tsg101	tumor susceptibility gene 101	10.64068021	10.31908715	10.49202935	10.29146107	10.20541634	10.55809665	10.226603	10.24915314	10.43581445	10.30981728	-0.125997163	0.270990916	0.815194614
ENSMUSG00000058603	Rpl28-ps1	ribosomal protein L28, pseudogene 1	8.112023813	8.488197595	8.18014169	8.572490746	8.665171477	8.333350256	8.376113169	8.384863834	8.338213461	8.439874684	0.101661223	0.501374846	0.965516704
ENSMUSG00000064927	Gm22043	predicted gene, 22043	0	0	0	0	0	0	1.078314528	0.994123999	0	0.518109632	0.518109632	0.678216137	0.969741274
ENSMUSG00000055401	Fbxo6	F-box protein 6	8.299150184	8.373760042	8.311702284	8.560416078	8.424809386	8.434330315	8.371278389	8.410323205	8.386257147	8.410185324	0.023928177	0.843118379	0.973353259
ENSMUSG00000055403	4933427D06Rik	RIKEN cDNA 4933427D06 gene	0	0	2.41333609	0	3.465775941	1.809634363	0	2.312514971	0.603334022	1.896981319	1.293647296	0.237748663	0.771217281
ENSMUSG00000055407	Map6	microtubule-associated protein 6	11.85856446	11.79543359	12.0935669	12.06240393	11.76186271	11.92818741	11.86980087	11.79920048	11.95249222	11.83976287	-0.112729353	0.190151315	0.701052497
ENSMUSG00000055409	Nell1	NEL-like 1	10.02506752	10.15553363	10.33560352	10.45257339	10.16431806	10.32154222	9.824843743	9.480093485	10.24219452	9.947699378	-0.294495137	0.101244021	0.524457831
ENSMUSG00000050439	Enthd1	ENTH domain containing 1	2.068014459	0	2.41333609	0	0	0	0	1.991176999	1.120337637	0.49779425	-0.622543387	0.539632595	0.965516704
ENSMUSG00000115550	---	---	2.66033993	0	0	2.061062922	0	0	0	0	1.180350713	0	-1.180350713	0.175338507	0.677071524
ENSMUSG00000115553	---	---	0	2.05644782	2.157573411	0	2.813337462	2.117931851	2.115933218	2.575155827	1.053505308	2.40558959	1.352084282	0.210822667	0.732425373
ENSMUSG00000115555	---	---	0	0	0	0	0	1.809634363	0	0	0	0.452408591	0.452408591	0.609425585	0.969741274
ENSMUSG00000051527	Usp29	ubiquitin specific peptidase 29	7.909784469	7.80915083	8.01620668	6.925662221	7.621651555	7.522809096	7.341428284	7.363334627	7.66520105	7.46230589	-0.20289516	0.224448865	0.752326765
ENSMUSG00000095562	Gm21887	predicted gene, 21887	9.933817703	3.389405204	9.440990362	6.269603094	9.811100459	10.10012203	10.38729312	10.42077442	7.258454091	10.17982251	2.921368417	0.198946258	0.714210157
ENSMUSG00000109165	Gm45148	predicted gene 45148	4.545452185	4.463626252	3.61474788	3.533121572	4.006542134	3.22524116	4.231515646	3.574171483	4.039236972	3.759367606	-0.279869366	0.485642623	0.96493119
ENSMUSG00000109167	Gm44652	predicted gene 44652	1.04569736	0	0	0	0	0	0	0	0.26142434	0	-0.26142434	0.830018289	0.973353259
ENSMUSG00000109160	4930598N05Rik	RIKEN cDNA 4930598N05 gene	1.645576219	3.389405204	4.752870796	3.775234473	4.650554971	3.757841642	3.949570471	1.577122502	3.390771673	3.483772396	0.093000723	0.928073962	0.9978586
ENSMUSG00000109163	3110009M11Rik	RIKEN cDNA 3110009M11 gene	0	1.635246308	2.819232083	2.061062922	2.32751257	0.875920088	1.688464829	1.991176999	1.628885328	1.720768621	0.091883293	0.852695317	0.973896636
ENSMUSG00000109162	2900027M19Rik	RIKEN cDNA 2900027M19 gene	2.884829173	2.05644782	0	0	1.58961773	0	0	1.991176999	1.235319248	0.895198682	-0.340120566	0.600500972	0.969741274
ENSMUSG00000109168	Gm44709	predicted gene 44709	1.04569736	1.635246308	1.449333651	3.775234473	0	3.66590362	0	1.991176999	1.976377948	1.414270155	-0.562107793	0.859090238	0.975601945
ENSMUSG00000113863	CR974429.3	---	0	0	2.41333609	0	2.005236078	1.809634363	2.713220414	1.577122502	0.603334022	2.026303339	1.422969317	0.294210317	0.842725224
ENSMUSG00000113861	CT485612.10	---	0	0	2.986096998	1.040994419	3.591359576	2.775313294	2.445268757	0	1.006772854	2.202985407	1.196212552	0.303074793	0.852347787
ENSMUSG00000113860	AC135667.1	---	4.255061632	3.389405204	4.1944172	2.652653363	1.58961773	4.002991028	3.30634127	3.448730115	3.62288435	3.086920036	-0.535964314	0.446336825	0.952673605
ENSMUSG00000113866	AC124752.1	---	2.068014459	0	0	2.386971434	0	0	2.115933218	2.575155827	1.113746473	1.172772261	0.059025788	0.926334496	0.9978586
ENSMUSG00000113865	CT573034.4	---	1.04569736	0	0	0	1.003492829	1.417032207	0	0	0.26142434	0.605131259	0.343706919	0.723919272	0.973353259
ENSMUSG00000113864	AC160340.1	---	2.068014459	0	0	0	2.005236078	2.37180711	0	0	0.517003615	1.094260797	0.577257182	0.585753887	0.969741274
ENSMUSG00000113869	AC131743.4	---	2.068014459	0	0	0	0	0	1.688464829	0	0.517003615	0.422116207	-0.094887408	0.855970457	0.974326309
ENSMUSG00000094995	Pate3	prostate and testis expressed 3	0	1.037876205	0	2.061062922	0	1.809634363	0	0	0.774734782	0.452408591	-0.322326191	0.789752746	0.973353259
ENSMUSG00000040771	Oard1	O-acyl-ADP-ribose deacylase 1	7.82429156	7.613550341	7.723111394	7.38413908	7.820727479	7.548781216	7.965733346	8.122692365	7.636273094	7.864483601	0.228210508	0.155053322	0.640074394
ENSMUSG00000040774	Cept1	choline/ethanolaminephosphotransferase 1	9.438585927	9.659651005	9.700080874	9.697304761	9.733187165	9.797060832	9.895578286	9.632094937	9.623905642	9.764480305	0.140574663	0.157439387	0.64462099
ENSMUSG00000094993	Igkv4-51	immunoglobulin kappa chain variable 4-51	0	0	0	0	0	0	0	0.994123999	0	0.248531	0.248531	0.846512451	0.973353259
ENSMUSG00000115088	---	---	0	0	2.41333609	3.070993449	2.005236078	0.875920088	0	0	1.371082385	0.720289042	-0.650793343	0.362602156	0.902828457
ENSMUSG00000094999	Gm17412	predicted gene, 17412	0	0	0	0	0	0.875920088	0	0	0	0.218980022	0.218980022	0.846512451	0.973353259
ENSMUSG00000056174	Col8a2	collagen, type VIII, alpha 2	5.99542741	5.931507328	4.752870796	5.505291031	5.761735824	3.348651568	5.396707736	6.117675891	5.546274141	5.156192755	-0.390081387	0.716147928	0.971543281
ENSMUSG00000111702	AC105958.2	---	0	0	0	0	0	0.875920088	0	0	0	0.218980022	0.218980022	0.846512451	0.973353259
ENSMUSG00000100190	Krtap28-10	keratin associated protein 28-10	0	0	1.449333651	0	0	0	0	0	0.362333413	0	-0.362333413	0.692015925	0.969741274
ENSMUSG00000109256	Gm44681	predicted gene 44681	0	0	1.449333651	0	0	1.809634363	0	0	0.362333413	0.452408591	0.090075178	0.902838188	0.989547607
ENSMUSG00000105804	Gm43654	predicted gene 43654	0	2.64754811	2.986096998	3.242017635	3.006106913	0	0	2.575155827	2.218915686	1.395315685	-0.823600001	0.5227731	0.965516704
ENSMUSG00000105802	Gm43012	predicted gene 43012	5.257491152	5.980458848	5.725865671	5.751738801	6.136160803	5.603037346	6.360091108	5.380822891	5.678888618	5.870028037	0.191139419	0.445221505	0.95243028
ENSMUSG00000057802	Gm10030	predicted gene 10030	4.841644267	4.715721513	3.80541029	4.83282835	4.006542134	4.276043866	4.467265589	3.988962792	4.548901105	4.184703595	-0.36419751	0.284775859	0.833643197
ENSMUSG00000105808	Gm42627	predicted gene 42627	0	1.635246308	0.899492338	0	0	0	1.078314528	0.994123999	0.633684661	0.518109632	-0.11557503	0.829263085	0.973353259
ENSMUSG00000012126	Ubxn11	UBX domain protein 11	8.442871591	8.732814481	8.612130069	8.960272381	9.01539233	8.653635714	8.491998878	9.002267308	8.687022131	8.790823557	0.103801427	0.475899436	0.962533899
ENSMUSG00000012123	Crybg2	crystallin beta-gamma domain containing 2	3.991054272	5.116967398	4.842632075	4.246406016	4.864718185	4.917967956	4.731512262	5.117844779	4.54926494	4.908010796	0.358745855	0.390235073	0.922012442
ENSMUSG00000025269	Apex2	apurinic/apyrimidinic endonuclease 2	7.133724628	7.193200075	7.141558804	7.38413908	6.482632445	6.731080601	6.751015123	6.588258703	7.213155647	6.638246718	-0.574908929	0.00045142	0.015444069
ENSMUSG00000025268	Maged2	melanoma antigen, family D, 2	9.420772989	9.434422032	9.269527713	9.453602543	9.645404404	9.391561575	9.55112502	9.559992148	9.394581319	9.537020787	0.142439467	0.126907163	0.582866617
ENSMUSG00000025266	Gnl3l	guanine nucleotide binding protein-like 3 (nucleolar)-like	12.30368502	12.48892673	12.72259036	12.2001038	12.43899581	12.59798081	12.63839993	12.51936371	12.42882647	12.54868506	0.11985859	0.341371417	0.883100382
ENSMUSG00000025265	Fgd1	FYVE, RhoGEF and PH domain containing 1	8.935291968	8.96032569	9.389796777	9.377647279	9.102361521	9.00740447	9.242442568	9.163170106	9.165765428	9.128844666	-0.036920762	0.686974301	0.969741274
ENSMUSG00000025264	Tsr2	TSR2 20S rRNA accumulation	10.23329766	10.55754043	10.61335273	10.46125816	10.56826056	10.58580058	10.71664971	10.3589203	10.46636225	10.55740779	0.091045543	0.412334611	0.931382249
ENSMUSG00000025261	Huwe1	HECT, UBA and WWE domain containing 1	13.43843476	13.5058826	13.45235939	13.38861837	13.32904552	13.34403679	13.31575801	13.48370531	13.44632378	13.36813641	-0.078187372	0.270826745	0.814994384
ENSMUSG00000025260	Hsd17b10	hydroxysteroid (17-beta) dehydrogenase 10	8.259613631	8.239436375	8.315626327	8.388947047	8.807861517	8.280079775	8.44215201	8.435341073	8.300905845	8.491358594	0.190452749	0.132777728	0.596183017
ENSMUSG00000091123	Gm17181	predicted gene 17181	0	0	0	1.040994419	0	0	0	0	0.260248605	0	-0.260248605	0.830018289	0.973353259
ENSMUSG00000094336	Gm13693	predicted gene 13693	0	1.037876205	0.899492338	0	1.003492829	0.875920088	1.078314528	0	0.484342136	0.739431861	0.255089726	0.806709072	0.973353259
ENSMUSG00000094338	Hist1h2bl	histone cluster 1, H2bl	1.04569736	0	0	2.061062922	1.003492829	0.875920088	1.078314528	0	0.77669007	0.739431861	-0.037258209	0.804914322	0.973353259
ENSMUSG00000065328	Gm22053	predicted gene, 22053	0	0	0	0	0	0.875920088	0	0	0	0.218980022	0.218980022	0.846512451	0.973353259
ENSMUSG00000065329	Gm22054	predicted gene, 22054	0	0	0	0	0	0.875920088	0	0.994123999	0	0.467511022	0.467511022	0.698136627	0.96988229
ENSMUSG00000060131	Atp8b4	ATPase, class I, type 8B, member 4	2.068014459	2.05644782	0	0	2.005236078	1.809634363	0	0	1.03111557	0.95371761	-0.07739796	0.926447791	0.9978586
ENSMUSG00000065320	Gm22056	predicted gene, 22056	2.068014459	1.037876205	1.449333651	1.639366891	1.58961773	0.875920088	1.078314528	0.994123999	1.548647802	1.134494086	-0.414153715	0.578416844	0.969741274
ENSMUSG00000065327	Gm22058	predicted gene, 22058	0	2.05644782	0	0	0	0	0	0	0.514111955	0	-0.514111955	0.541846636	0.965516704
ENSMUSG00000047205	Dusp18	dual specificity phosphatase 18	10.30180632	10.34618747	10.50325556	10.03206137	9.928810984	10.16032379	10.19958291	10.41134849	10.29582768	10.17501654	-0.120811136	0.333294154	0.877914407
ENSMUSG00000024725	Ostf1	osteoclast stimulating factor 1	7.953803252	8.208950345	7.79795212	7.787838942	8.466389068	8.098575581	8.35667607	8.569455421	7.937136165	8.372774035	0.43563787	0.003355192	0.065343332
ENSMUSG00000097979	Gm4691	predicted gene 4691	2.394364844	0	0	2.061062922	0	3.462332101	1.688464829	1.991176999	1.113856941	1.785493482	0.671636541	0.446074217	0.952551517
ENSMUSG00000109995	B020031H02Rik	RIKEN cDNA B020031H02 gene	0	0	0	2.061062922	0	0	0	0	0.51526573	0	-0.51526573	0.540781741	0.965516704
ENSMUSG00000097970	Gm27028	predicted gene, 27028	3.891101417	2.8716894	0	3.659250993	3.006106913	2.587621499	3.134381001	3.311334	2.605510453	3.009860853	0.404350401	0.864252665	0.977320391
ENSMUSG00000097971	Gm26917	predicted gene, 26917	10.10532234	9.410060937	9.230569913	9.913659881	9.688207157	9.480269375	9.566011459	9.597417845	9.664903269	9.582976459	-0.08192681	0.463443384	0.957642267
ENSMUSG00000067787	Blcap	bladder cancer associated protein	10.99833882	10.95585872	11.03293483	10.93334307	11.25668042	11.06444739	11.27729855	11.04011819	10.98011886	11.15963614	0.17951728	0.026032956	0.247903323
ENSMUSG00000097974	Gm10605	predicted gene 10605	5.869764203	5.658226806	5.319886162	5.886806183	7.599398196	6.524101517	7.351282821	7.264424655	5.683670839	7.184801797	1.501130958	1.37E-09	5.41E-07
ENSMUSG00000082609	Gm15464	predicted gene 15464	0	1.037876205	0.899492338	1.040994419	0	0.875920088	1.078314528	0.994123999	0.74459074	0.737089654	-0.007501087	0.989551471	0.9978586
ENSMUSG00000053279	Aldh1a1	aldehyde dehydrogenase family 1, subfamily A1	10.5442287	10.07189157	10.10564774	11.02699147	10.45612089	10.59829019	9.917301008	9.626674717	10.43718987	10.1495967	-0.287593169	0.368724873	0.906718921
ENSMUSG00000109839	Gm45677	predicted gene 45677	0	0	0	0	0	2.37180711	0	0	0	0.592951777	0.592951777	0.466685004	0.957642267
ENSMUSG00000102500	Gm37371	predicted gene, 37371	0	1.037876205	0.899492338	0	0	0.875920088	1.078314528	0.994123999	0.484342136	0.737089654	0.252747518	0.808368785	0.973353259
ENSMUSG00000068324	Gm10029	predicted gene 10029	3.403168963	2.8716894	2.986096998	3.394899473	4.254538354	3.090278098	2.939114924	3.159462173	3.163963709	3.360848387	0.196884679	0.583016647	0.969741274
ENSMUSG00000068327	Tlx2	T cell leukemia, homeobox 2	2.66033993	0	1.846484642	0	0	0	0	0	1.126706143	0	-1.126706143	0.197337049	0.712478702
ENSMUSG00000068323	Slc4a5	solute carrier family 4, sodium bicarbonate cotransporter, member 5	2.394364844	0	0	3.070993449	0	3.348651568	2.115933218	0	1.366339573	1.366146197	-0.000193377	0.936218951	0.9978586
ENSMUSG00000046999	1110032F04Rik	RIKEN cDNA 1110032F04 gene	9.06136134	9.274331798	9.228490069	9.178744675	8.995648208	9.053486355	9.115201657	8.901137834	9.185731971	9.016368513	-0.169363457	0.079320701	0.466111338
ENSMUSG00000068329	Htra2	HtrA serine peptidase 2	8.294266964	8.711224899	8.369470863	8.884811188	8.937700297	8.641618127	9.094816027	8.759740494	8.564943479	8.858468736	0.293525258	0.068361245	0.431243271
ENSMUSG00000068328	Aup1	ancient ubiquitous protein 1	10.65884031	10.41011735	10.29245151	10.5945299	10.38201141	10.23320799	10.33238012	10.43738107	10.48898477	10.34624515	-0.142739617	0.140163979	0.611396613
ENSMUSG00000106384	Gm43188	predicted gene 43188	0	0	0	0	0	1.809634363	0	0	0	0.452408591	0.452408591	0.609425585	0.969741274
ENSMUSG00000110070	Gm45619	predicted gene 45619	6.042780076	6.643871666	6.600811643	6.506206227	6.937657507	7.217487871	6.919451112	6.821217698	6.448417403	6.973953547	0.525536144	0.008053527	0.11830123
ENSMUSG00000106380	Gm3519	predicted gene 3519	1.645576219	3.527574467	3.271140962	0	0	0	2.115933218	0	2.111072912	0.528983305	-1.582089607	0.075319008	0.453106435
ENSMUSG00000106383	E330034L11Rik	RIKEN cDNA E330034L11 gene	8.21896299	7.888240653	7.906006739	8.240452462	8.073040442	8.07642736	8.327020414	7.814824542	8.063415711	8.072828189	0.009412479	0.940490066	0.9978586
ENSMUSG00000064493	Snora28	small nucleolar RNA, H/ACA box 28	1.04569736	1.037876205	0.899492338	1.040994419	1.003492829	0.875920088	1.078314528	0.994123999	1.00601508	0.987962861	-0.018052219	0.981393144	0.9978586
ENSMUSG00000063442	Gm7117	predicted pseudogene 7117	0	0	0	0	0	1.417032207	0	1.991176999	0	0.852052301	0.852052301	0.430654722	0.939803016
ENSMUSG00000063445	Nmral1	NmrA-like family domain containing 1	7.384056545	7.590084943	7.540690855	7.429101757	8.351251714	7.50964557	7.729266365	8.168173829	7.485983525	7.93958437	0.453600845	0.009443884	0.131368594
ENSMUSG00000064496	DQ267101	snoRNA DQ267101	0	0	0	0	1.003492829	0.875920088	1.078314528	0.994123999	0	0.987962861	0.987962861	0.379055279	0.913855324
ENSMUSG00000064495	Gm24313	predicted gene, 24313	0	0	1.449333651	1.040994419	0	1.417032207	1.078314528	0	0.622582018	0.623836684	0.001254666	0.995506726	0.998760834
ENSMUSG00000063446	Plppr1	phospholipid phosphatase related 1	8.313701451	7.368939883	7.150374269	7.627329995	9.362317693	9.22638215	8.465023395	8.584444276	7.6150864	8.909541878	1.294455479	3.11E-07	5.14E-05
ENSMUSG00000076940	Iglv2	immunoglobulin lambda variable 2	3.541470204	2.64754811	4.385735942	0	1.58961773	0.875920088	0	2.312514971	2.643688564	1.194513197	-1.449175367	0.032481405	0.284290227
ENSMUSG00000070522	Gm6505	predicted pseudogene 6505	4.730353856	4.318870111	4.444258039	4.536709089	4.094030572	4.995556428	4.605430475	4.846612636	4.507547774	4.635407528	0.127859754	0.626635643	0.969741274
ENSMUSG00000076949	Gm22066	predicted gene, 22066	0	0	0.899492338	0	0	0.875920088	1.078314528	0	0.224873085	0.488558654	0.263685569	0.854453202	0.973949405
ENSMUSG00000066438	Plekhd1	pleckstrin homology domain containing, family D (with coiled-coil domains) member 1	5.921350221	6.774522197	6.253433838	6.033783582	6.748379158	6.537134393	7.058279266	6.617700018	6.24577246	6.740373209	0.494600749	0.043592531	0.335892957
ENSMUSG00000100975	Gm28875	predicted gene 28875	4.255061632	3.769606182	3.135647341	3.070993449	4.960948988	2.775313294	4.467265589	4.689118391	3.557827151	4.223161565	0.665334414	0.124684183	0.578392548
ENSMUSG00000118167	---	---	0	0	0	0	0	0	0	1.991176999	0	0.49779425	0.49779425	0.56486706	0.965516704
ENSMUSG00000092470	Gm20518	predicted gene 20518	7.996518627	7.907353739	7.533969865	7.240177446	7.216383558	7.916066323	6.971492818	7.22670701	7.669504919	7.332662427	-0.336842492	0.164919134	0.659859209
ENSMUSG00000092471	Cyp21a2-ps	cytochrome P450, family 21, subfamily a, polypeptide 2 pseudogene	0	2.05644782	0	0	0	0	0	0	0.514111955	0	-0.514111955	0.541846636	0.965516704
ENSMUSG00000092473	Vmn1r180	vomeronasal 1 receptor 180	2.66033993	0	0	0	0	0	0	0	0.665084982	0	-0.665084982	0.403152467	0.925901209
ENSMUSG00000019933	Mrln	myoregulin	0	3.06564474	0	0	2.813337462	1.417032207	0	1.577122502	0.766411185	1.451873043	0.685461858	0.814331685	0.973353259
ENSMUSG00000019935	Slc17a8	solute carrier family 17 (sodium-dependent inorganic phosphate cotransporter), member 8	7.346809105	6.717910625	6.922339575	6.383641151	6.310669862	7.935884055	6.705643439	6.075860683	6.842675114	6.75701451	-0.085660604	0.835679681	0.973353259
ENSMUSG00000019936	Epyc	epiphycan	5.642723023	4.530898564	5.006959543	4.83282835	5.561417974	6.34300087	3.949570471	4.988593426	5.00335237	5.210645685	0.207293315	0.359375585	0.900967805
ENSMUSG00000107596	Gm18913	predicted gene, 18913	0	0	0	0	0	0	2.939114924	0	0	0.734778731	0.734778731	0.356649521	0.898733143
ENSMUSG00000070469	Adamtsl3	ADAMTS-like 3	5.788752591	5.394888389	5.118981298	4.536709089	6.196706431	5.552585985	5.877781601	5.346064338	5.209832842	5.743284589	0.533451747	0.110962858	0.54947021
ENSMUSG00000103779	Gm36931	predicted gene, 36931	4.47814862	4.24065392	3.394994784	4.075933197	2.590779194	3.84427012	2.445268757	3.689572954	4.04743263	3.142472756	-0.904959874	0.103584796	0.530982285
ENSMUSG00000064145	Arih2	ariadne RBR E3 ubiquitin protein ligase 2	10.3764795	10.40900023	10.54814081	10.53818104	10.31417254	10.2648908	10.22927738	9.939520625	10.46795039	10.18696533	-0.280985059	0.005651266	0.093465502
ENSMUSG00000020346	Mgat1	mannoside acetylglucosaminyltransferase 1	9.514030879	9.707686809	9.325087291	9.580593364	8.565379474	10.14975607	9.426157516	8.511818053	9.531849586	9.163277779	-0.368571806	0.594475906	0.969741274
ENSMUSG00000064147	Rab44	RAB44, member RAS oncogene family	0	2.05644782	0	0	2.005236078	2.37180711	0	0	0.514111955	1.094260797	0.580148842	0.582509104	0.969741274
ENSMUSG00000064141	Zfp69	zinc finger protein 69	5.843262585	5.801328139	3.973791331	5.400817042	5.216242458	5.069184272	4.902110306	4.942801653	5.254799774	5.032584672	-0.222215102	0.317702079	0.86167477
ENSMUSG00000064140	Trim38	tripartite motif-containing 38	0	1.635246308	0	0	2.590779194	1.809634363	0	0	0.408811577	1.100103389	0.691291812	0.413766547	0.93236773
ENSMUSG00000103770	Pcdha9	protocadherin alpha 9	7.133724628	7.46666696	7.852990824	7.446701666	7.206602218	7.844478568	7.611204507	7.29207955	7.475021019	7.488591211	0.013570191	0.949529369	0.9978586
ENSMUSG00000107595	Gm44441	predicted gene, 44441	0	0	0	0	0	0	0	2.575155827	0	0.643788957	0.643788957	0.425793562	0.93752711
ENSMUSG00000118161	---	---	4.730353856	4.979242675	4.798449417	4.163686085	4.76160691	5.032839998	5.318492948	4.796001121	4.667933008	4.977235244	0.309302236	0.359400601	0.900967805
ENSMUSG00000107593	Gm44097	predicted gene, 44097	1.645576219	0	0	2.386971434	0	0	0	0	1.008136913	0	-1.008136913	0.287568462	0.836579106
ENSMUSG00000107479	2610300M13Rik	RIKEN cDNA 2610300M13 gene	0	0	0	0	0	0	0	2.989701238	0	0.74742531	0.74742531	0.339144876	0.881053508
ENSMUSG00000097593	Gm26676	predicted gene, 26676	3.250190284	3.236588011	3.271140962	3.533121572	2.813337462	2.587621499	3.598803161	3.574171483	3.322760207	3.143483401	-0.179276806	0.799296092	0.973353259
ENSMUSG00000107477	Gm44366	predicted gene, 44366	2.884829173	1.635246308	2.157573411	2.386971434	1.58961773	2.587621499	0	1.991176999	2.266155081	1.542104057	-0.724051025	0.510979114	0.965516704
ENSMUSG00000107476	Zfp862-ps	zinc finger protein 862, pseudogene	9.216539982	9.046181772	8.740276148	9.409408721	9.399284288	9.218313335	9.284194688	9.305655114	9.103101656	9.301861856	0.1987602	0.182695077	0.688666375
ENSMUSG00000107470	Gm3375	predicted gene 3375	4.841644267	5.828320675	5.653299085	4.936123083	5.889502295	5.139236278	5.192595333	5.032976351	5.314846778	5.313577564	-0.001269213	0.932243182	0.9978586
ENSMUSG00000054728	Phactr1	phosphatase and actin regulator 1	12.48256112	12.29937286	12.54282217	12.26880983	12.52808568	12.8211727	12.34639829	13.86857356	12.39839149	12.89105756	0.492666064	0.083517835	0.478459416
ENSMUSG00000054723	Vmac	vimentin-type intermediate filament associated coiled-coil protein	8.05542686	7.795537154	7.803551445	7.919716464	7.65079861	8.21263281	8.33200555	7.870917118	7.893557981	8.016588522	0.123030541	0.379564951	0.913918903
ENSMUSG00000054720	Lrrc8c	leucine rich repeat containing 8 family, member C	10.92125095	10.70682389	10.69017371	10.72105176	9.991388811	10.19465802	10.09789284	9.958341646	10.75982508	10.06057033	-0.699254749	1.28E-14	2.40E-11
ENSMUSG00000117939	---	---	0	0	0	1.040994419	0	0	0	0	0.260248605	0	-0.260248605	0.830018289	0.973353259
ENSMUSG00000117935	---	---	1.04569736	2.05644782	1.449333651	1.639366891	2.005236078	1.417032207	1.688464829	0.994123999	1.547711431	1.526214278	-0.021497153	0.976239557	0.9978586
ENSMUSG00000117936	---	---	0	0	0	0	0	0	2.115933218	0	0	0.528983305	0.528983305	0.535790408	0.965516704
ENSMUSG00000117930	---	---	0	2.05644782	0	2.386971434	0	0	2.939114924	0	1.110854814	0.734778731	-0.376076083	0.936136337	0.9978586
ENSMUSG00000054622	D730045B01Rik	RIKEN cDNA D730045B01 gene	0	2.05644782	0	1.639366891	1.003492829	3.22524116	0	1.577122502	0.923953678	1.451464123	0.527510445	0.463597384	0.957642267
ENSMUSG00000036745	Ttll7	tubulin tyrosine ligase-like family, member 7	11.00358379	12.49024777	11.40807509	10.9839437	11.2441843	11.43111293	11.37774282	11.0895485	11.47146259	11.28564714	-0.18581545	0.386963156	0.919136247
ENSMUSG00000099252	Gm27265	predicted gene, 27265	0	0	0	0	0	0	1.078314528	0.994123999	0	0.518109632	0.518109632	0.678216137	0.969741274
ENSMUSG00000099259	Mir6922	microRNA 6922	1.04569736	1.037876205	0.899492338	1.040994419	1.003492829	0.875920088	1.078314528	0.994123999	1.00601508	0.987962861	-0.018052219	0.981393144	0.9978586
ENSMUSG00000099258	Mir7047	microRNA 7047	2.068014459	1.635246308	1.846484642	1.639366891	2.005236078	2.117931851	2.115933218	1.577122502	1.797278075	1.954055912	0.156777837	0.817782998	0.973353259
ENSMUSG00000033510	Otud7a	OTU domain containing 7A	10.71564521	11.05202717	11.17200002	11.0400941	10.71087662	10.94301264	10.94855403	10.77368313	10.99494163	10.84403161	-0.150910019	0.147836337	0.626770924
ENSMUSG00000036748	Cuedc2	CUE domain containing 2	10.39712354	10.56156764	10.56472221	10.97714724	10.81110435	10.95033847	10.38609527	10.07569768	10.62514015	10.55580894	-0.069331214	0.79937661	0.973353259
ENSMUSG00000113030	CT009754.1	---	0	3.236588011	0	1.040994419	1.58961773	0.875920088	1.078314528	1.577122502	1.069395608	1.280243712	0.210848104	0.660614494	0.969741274
ENSMUSG00000113031	AC158365.1	---	3.403168963	1.635246308	0	2.061062922	4.094030572	0	2.115933218	1.991176999	1.774869548	2.050285197	0.275415649	0.618126939	0.969741274
ENSMUSG00000116041	---	---	1.04569736	1.635246308	1.449333651	1.639366891	1.58961773	1.417032207	1.078314528	2.312514971	1.442411053	1.599369859	0.156958806	0.781220768	0.973353259
ENSMUSG00000062797	Hikeshi	heat shock protein nuclear import factor	9.438585927	9.269415885	9.346341982	9.398145449	9.41847799	9.362568892	9.324772395	9.099381019	9.363122311	9.301300074	-0.061822237	0.562516975	0.965516704
ENSMUSG00000062794	Zfp599	zinc finger protein 599	7.020013646	6.395800231	7.059697557	6.145771189	6.665119789	7.151220563	6.837689855	6.178210492	6.655320656	6.708060175	0.052739519	0.875813931	0.98106821
ENSMUSG00000115458	---	---	1.04569736	0	0	0	0	0	0	0	0.26142434	0	-0.26142434	0.830018289	0.973353259
ENSMUSG00000116048	---	---	10.44417432	6.907033991	10.15575968	8.805184038	10.49380739	9.743248293	10.35214507	10.79960524	9.078038006	10.3472015	1.269163494	0.257589074	0.795187936
ENSMUSG00000062421	Arf2	ADP-ribosylation factor 2	10.0785904	10.1245632	10.08969557	10.07088273	10.19926409	10.2853108	10.23859887	10.01752251	10.09093297	10.18517407	0.094241092	0.241174706	0.775320271
ENSMUSG00000019066	Rab3d	RAB3D, member RAS oncogene family	8.507588984	8.66330873	8.499350601	8.66185135	8.775145584	8.391915568	8.460478033	8.455862918	8.583024916	8.520850526	-0.062174391	0.641360029	0.969741274
ENSMUSG00000035498	Cdcp1	CUB domain containing protein 1	4.730353856	3.653659897	5.118981298	3.882583475	3.328209112	4.557643452	2.713220414	4.381104338	4.346394632	3.745044329	-0.601350303	0.285981765	0.835132895
ENSMUSG00000091462	Gm17084	predicted gene 17084	1.04569736	2.64754811	1.846484642	1.040994419	2.005236078	1.417032207	1.688464829	1.577122502	1.645181133	1.671963904	0.026782771	0.872072837	0.979677955
ENSMUSG00000101731	3830432H09Rik	RIKEN cDNA 3830432H09 gene	0	2.8716894	0	2.061062922	0	0	0	0	1.23318808	0	-1.23318808	0.140552016	0.612229851
ENSMUSG00000101734	4933400C23Rik	RIKEN cDNA 4933400C23 gene	0	0	0	0	2.590779194	0	0	1.577122502	0	1.041975424	1.041975424	0.253070908	0.790657869
ENSMUSG00000055891	Ubl4b	ubiquitin-like 4B	0	2.64754811	0	0	1.003492829	0	2.115933218	2.989701238	0.661887028	1.527281822	0.865394794	0.530656549	0.965516704
ENSMUSG00000055897	Ppp4r1l-ps	protein phosphatase 4, regulatory subunit 1-like, pseudogene	9.234495683	8.98752153	9.037377094	8.941773883	9.478642634	9.058014611	9.385974987	9.567555361	9.050292047	9.372546898	0.322254851	0.009468068	0.131457468
ENSMUSG00000108013	Gm44052	predicted gene, 44052	0	0	0	1.639366891	0	0	0	0	0.409841723	0	-0.409841723	0.662772563	0.969741274
ENSMUSG00000108010	Gm38708	predicted gene, 38708	2.66033993	2.64754811	1.846484642	1.639366891	2.590779194	2.117931851	3.134381001	2.575155827	2.198434893	2.604561968	0.406127075	0.556306046	0.965516704
ENSMUSG00000108011	Gm44596	predicted gene 44596	0	0	0	0	0	2.117931851	0	0	0	0.529482963	0.529482963	0.52690629	0.965516704
ENSMUSG00000108015	Gm32591	predicted gene, 32591	2.66033993	0	0	0	0	0	2.115933218	1.577122502	0.665084982	0.92326393	0.258178948	0.997482042	0.999352877
ENSMUSG00000097154	Gm26510	predicted gene, 26510	2.068014459	2.05644782	1.846484642	2.061062922	3.006106913	3.348651568	3.134381001	3.159462173	2.008002461	3.162150414	1.154147953	0.047765238	0.351710821
ENSMUSG00000097155	Gm26511	predicted gene, 26511	2.068014459	2.05644782	1.846484642	0	0	1.417032207	0	0	1.49273673	0.354258052	-1.138478678	0.240023079	0.773970773
ENSMUSG00000097156	Gm3764	predicted gene 3764	11.76194812	11.67931323	11.6311135	12.11632381	11.62536051	11.32286108	11.74313596	11.83018459	11.79717466	11.63038554	-0.166789127	0.202108	0.718246199
ENSMUSG00000097157	Gm26512	predicted gene, 26512	4.894227342	5.358315736	5.082598685	3.533121572	5.621545012	5.300789739	5.575489176	5.447924293	4.717065834	5.486437055	0.769371221	0.069006412	0.433770121
ENSMUSG00000097150	Gm26513	predicted gene, 26513	3.250190284	2.8716894	3.271140962	4.324639127	3.328209112	1.809634363	4.14351718	4.076382183	3.429414943	3.33943571	-0.089979234	0.950080947	0.9978586
ENSMUSG00000028444	Cntfr	ciliary neurotrophic factor receptor	11.1687692	11.22322788	11.31754098	11.47314426	11.41158405	11.34433712	11.42166387	11.63568608	11.29567058	11.45331778	0.157647201	0.101196072	0.524379648
ENSMUSG00000028445	Enho	energy homeostasis associated	9.946322999	10.21170979	10.19036468	10.30720264	10.2525242	10.08799566	10.23727091	10.12137671	10.16390003	10.17479187	0.010891842	0.950539476	0.9978586
ENSMUSG00000112343	AC154734.1	---	4.894227342	2.05644782	0	0	4.176515485	4.505549955	3.949570471	3.448730115	1.737668791	4.020091506	2.282422716	0.504976382	0.965516704
ENSMUSG00000112342	AC168058.1	---	2.068014459	0	0	0	0	0.875920088	2.445268757	0	0.517003615	0.830297211	0.313293597	0.764693499	0.973353259
ENSMUSG00000031918	Mtmr2	myotubularin related protein 2	10.47363058	10.60123323	10.41639234	10.40384946	10.52857293	10.49437302	10.12973213	10.13034149	10.4737764	10.32075489	-0.153021511	0.212500176	0.735683905
ENSMUSG00000031919	Tmed6	transmembrane p24 trafficking protein 6	2.884829173	0	1.846484642	0	0	0	1.688464829	0	1.182828454	0.422116207	-0.760712247	0.330393928	0.87498334
ENSMUSG00000112347	AC121961.1	---	1.645576219	3.876923321	3.271140962	3.070993449	3.006106913	0	1.078314528	0	2.966158488	1.02110536	-1.945053128	0.067110239	0.427150312
ENSMUSG00000112346	AC153504.1	---	5.76070528	5.854817447	5.628275788	5.664179491	5.433080099	5.389695085	6.340435459	6.431303367	5.726994502	5.898628503	0.171634001	0.395769178	0.925901209
ENSMUSG00000112349	AC153532.2	---	0	2.05644782	1.449333651	0	0	0	1.078314528	1.991176999	0.876445368	0.767372882	-0.109072486	0.892428894	0.986095621
ENSMUSG00000031916	Cog8	component of oligomeric golgi complex 8	9.607541949	9.945070258	9.941399411	9.926260667	9.827148486	9.707666465	9.805260949	9.410305969	9.855068071	9.687595467	-0.167472604	0.165858137	0.6618567
ENSMUSG00000031917	Nip7	NIP7, nucleolar pre-rRNA processing protein	9.277194008	9.011272602	9.106956545	8.981558385	8.843012347	8.998008792	9.083036446	8.921938802	9.094245385	8.961499097	-0.132746288	0.205834131	0.725190447
ENSMUSG00000031910	Has3	hyaluronan synthase 3	6.628212003	5.906394283	5.55049135	6.437448847	6.693410172	6.470759752	6.765827373	6.414626206	6.130636621	6.586155876	0.455519255	0.104502067	0.533304028
ENSMUSG00000031913	Vps4a	vacuolar protein sorting 4A	11.24856311	11.28785692	11.39931933	11.2254796	11.29584052	11.27065839	11.29910067	11.16564861	11.29030474	11.25781205	-0.032492694	0.643460388	0.969741274
ENSMUSG00000049349	Gm5105	predicted gene 5105	1.645576219	4.157952906	2.41333609	3.882583475	2.590779194	3.090278098	2.939114924	3.796423229	3.024862172	3.104148861	0.079286689	0.776119415	0.973353259
ENSMUSG00000038637	Lrrc56	leucine rich repeat containing 56	6.830642994	6.549697743	6.548418315	6.383641151	7.310713917	6.56285217	6.919451112	7.010682732	6.578100051	6.950924983	0.372824932	0.058891553	0.3970888
ENSMUSG00000001095	Slc13a2	solute carrier family 13 (sodium-dependent dicarboxylate transporter), member 2	0	0	1.846484642	0	0	0	0	0	0.46162116	0	-0.46162116	0.592102664	0.969741274
ENSMUSG00000038633	Degs1	delta(4)-desaturase, sphingolipid 1	9.922785937	9.975573975	9.744422433	9.803570561	9.812713318	9.944968212	9.817753444	9.873932839	9.861588227	9.862341953	0.000753727	0.996693354	0.999352877
ENSMUSG00000038630	Zkscan16	zinc finger with KRAB and SCAN domains 16	8.652003192	9.412292659	9.353993976	8.791474844	9.221284626	8.859608863	8.75584992	9.492065991	9.052441168	9.08220235	0.029761182	0.916277128	0.995482655
ENSMUSG00000030359	Pzp	pregnancy zone protein	7.26929888	5.596760178	3.271140962	1.040994419	2.32751257	3.22524116	2.713220414	4.796001121	4.29454861	3.265493816	-1.029054794	0.079201159	0.465580296
ENSMUSG00000030357	Fkbp4	FK506 binding protein 4	11.44530938	11.75819454	11.6806376	11.8327957	11.62948447	11.74479671	11.54271087	11.40397006	11.67923431	11.58024053	-0.098993779	0.338383481	0.881053508
ENSMUSG00000030351	Tspan11	tetraspanin 11	8.254594501	7.83599875	7.869101158	9.550386996	6.77509769	7.574294028	6.996826212	6.688777375	8.377520351	7.008748826	-1.368771525	0.001202469	0.031852951
ENSMUSG00000030350	Prmt8	protein arginine N-methyltransferase 8	11.25862581	11.27932366	11.46880249	11.47636104	11.19432631	11.19404236	11.17072623	10.97904286	11.37077825	11.13453444	-0.236243812	0.00697465	0.107240281
ENSMUSG00000030353	Tead4	TEA domain family member 4	5.611655722	5.565016072	4.798449417	3.659250993	5.364359452	4.995556428	4.538001383	4.689118391	4.908593051	4.896758914	-0.011834138	0.696857222	0.96988229
ENSMUSG00000030352	Tspan9	tetraspanin 9	9.918032091	9.901251624	9.757463433	10.31441045	10.27024076	10.19978962	10.20638552	10.09675913	9.972789401	10.19329376	0.220504358	0.082757549	0.476225158
ENSMUSG00000104818	Gm43661	predicted gene 43661	0	0	1.846484642	0	0	0	0	0	0.46162116	0	-0.46162116	0.592102664	0.969741274
ENSMUSG00000104814	Gm42979	predicted gene 42979	8.425111816	8.54625331	8.279919683	8.753088692	8.373278345	8.492360304	8.423590201	8.688692108	8.501093375	8.494480239	-0.006613136	0.940024417	0.9978586
ENSMUSG00000098332	2310009A05Rik	RIKEN cDNA 2310009A05 gene	7.100542386	6.732273137	6.58789061	6.603563095	7.029291494	6.891906567	6.971492818	7.010682732	6.756067307	6.975843403	0.219776096	0.242308801	0.77663389
ENSMUSG00000073460	Pnldc1	poly(A)-specific ribonuclease (PARN)-like domain containing 1	5.33562142	5.320791791	5.381084143	6.249688565	5.889502295	5.418153019	5.704100511	5.23646261	5.57179648	5.562054609	-0.009741871	0.875875833	0.98106821
ENSMUSG00000073468	Sft2d1	SFT2 domain containing 1	9.206178346	9.108067316	9.526427738	9.464442664	9.605020742	9.032931456	8.956402907	9.013386224	9.326279016	9.151935332	-0.174343683	0.310763121	0.857499897
ENSMUSG00000089224	Gm22075	predicted gene, 22075	0	1.037876205	0	0	0	0	0	0	0.259469051	0	-0.259469051	0.830018289	0.973353259
ENSMUSG00000089227	Gm25051	predicted gene, 25051	0	0	0	1.639366891	0	0	0	0	0.409841723	0	-0.409841723	0.662772563	0.969741274
ENSMUSG00000049690	Nckap5	NCK-associated protein 5	6.392667578	6.788334674	6.220326163	6.10201367	6.734832012	6.696646378	6.971492818	7.138054353	6.375835521	6.88525639	0.509420869	0.017346997	0.191177384
ENSMUSG00000106683	Gm43263	predicted gene 43263	2.394364844	1.635246308	1.846484642	3.070993449	2.590779194	1.809634363	0	0	2.236772311	1.100103389	-1.136668921	0.346936779	0.890139217
ENSMUSG00000035329	Fbxo33	F-box protein 33	10.94559167	9.869117195	11.12860586	10.76380284	9.199258139	10.77509047	10.559757	9.059708307	10.67677939	9.898453478	-0.778325914	0.191063601	0.702485984
ENSMUSG00000035325	Sec31a	Sec31 homolog A (S. cerevisiae)	11.74325745	11.58601693	11.7021558	11.57967812	11.44368625	11.54396297	11.51995581	11.36706512	11.65277708	11.46866754	-0.184109538	0.014810851	0.173554466
ENSMUSG00000070605	Zfp992	zinc finger protein 992	3.991054272	5.026626884	0	3.533121572	4.094030572	4.002991028	5.054651607	5.117844779	3.137700682	4.567379497	1.429678815	0.265800174	0.808186468
ENSMUSG00000026950	Neb	nebulin	6.176170881	5.658226806	6.972910444	6.167162113	3.813834889	4.749025824	6.259020203	6.646552516	6.243617561	5.367108358	-0.876509203	0.388922566	0.921046604
ENSMUSG00000075704	Txnrd2	thioredoxin reductase 2	7.966137241	8.453942898	8.78058109	8.333263688	8.067647086	8.362930069	8.306905806	8.40188657	8.383481229	8.284842383	-0.098638847	0.457320018	0.956861716
ENSMUSG00000075707	Dio3	deiodinase, iodothyronine type III	3.541470204	5.072504157	3.892055946	3.070993449	5.466250643	5.991824712	6.340435459	6.096919779	3.894255939	5.973857648	2.079601709	1.04E-06	0.000144388
ENSMUSG00000075706	Gpx4	glutathione peroxidase 4	11.95724697	12.16719353	12.10125953	12.13306597	12.14492741	12.06072999	12.03863519	12.006427	12.0896915	12.0626799	-0.027011602	0.699233799	0.96988229
ENSMUSG00000075701	Selenos	selenoprotein S	9.055601376	9.180559639	9.338649185	9.285293952	9.276092621	9.187646874	9.174685186	9.374104042	9.215026038	9.253132181	0.038106143	0.727578903	0.973353259
ENSMUSG00000023707	Ogfod2	2-oxoglutarate and iron-dependent oxygenase domain containing 2	8.429572298	8.586336375	8.766315382	8.53184252	8.514752741	8.441279771	8.631970463	8.519637384	8.578516644	8.52691009	-0.051606554	0.605812009	0.969741274
ENSMUSG00000026956	Uap1l1	UDP-N-acteylglucosamine pyrophosphorylase 1-like 1	7.990493318	8.391967539	8.47849981	8.398022186	8.48673799	7.818025516	8.322017993	8.153172092	8.314745713	8.194988398	-0.119757315	0.487507763	0.965516704
ENSMUSG00000075702	Selenom	selenoprotein M	9.894025018	10.02307687	9.74296613	9.884899152	9.992812296	9.609282835	9.890518558	10.00504367	9.886241792	9.874414339	-0.011827453	0.948831619	0.9978586
ENSMUSG00000026958	Dpp7	dipeptidylpeptidase 7	9.219118805	9.229473648	9.084134232	9.280394699	9.317579043	9.175195411	9.416802996	9.384846291	9.203280346	9.323605935	0.120325589	0.210303095	0.7318205
ENSMUSG00000026959	Grin1	glutamate receptor, ionotropic, NMDA1 (zeta 1)	14.41964356	14.20365976	14.36517035	14.41169914	13.92928242	14.13951367	13.97416057	13.90531705	14.3500432	13.98706843	-0.362974775	4.20E-05	0.002628554
ENSMUSG00000108435	Gm45051	predicted gene 45051	4.084528611	3.06564474	0	2.061062922	3.913403719	3.567705506	4.605430475	4.076382183	2.302809068	4.040730471	1.737921403	0.07503111	0.452397626
ENSMUSG00000056812	St8sia3	ST8 alpha-N-acetyl-neuraminide alpha-2,8-sialyltransferase 3	10.78777542	10.28782622	10.64877922	10.2419193	10.89723783	11.0227794	10.28432376	10.12906421	10.49157504	10.5833513	0.091776264	0.512665737	0.965516704
ENSMUSG00000043068	Fam89a	family with sequence similarity 89, member A	4.545452185	5.160101171	4.752870796	3.659250993	5.254721557	5.104635417	5.054651607	5.632316622	4.529418786	5.261581301	0.732162514	0.058683339	0.396354669
ENSMUSG00000043061	Tmem18	transmembrane protein 18	9.877795452	9.957349247	10.07819219	10.06946338	10.13882798	10.34025208	10.3582665	10.2885859	9.995700066	10.28148312	0.285783051	0.001167712	0.031295856
ENSMUSG00000043065	Spice1	spindle and centriole associated protein 1	9.081342023	8.598147305	8.640564359	8.777634128	8.689954871	8.950090027	8.903803917	8.685219985	8.774421954	8.8072672	0.032845246	0.841980596	0.973353259
ENSMUSG00000043067	Dpy19l1	dpy-19-like 1 (C. elegans)	11.51988971	11.92768328	12.1026796	11.52273453	11.81593946	11.94356418	11.85559082	11.74561739	11.76824678	11.84017796	0.071931182	0.694393595	0.96988229
ENSMUSG00000054046	Klk13	kallikrein related-peptidase 13	0	2.05644782	0	0	0	0	0	2.575155827	0.514111955	0.643788957	0.129677002	0.814576013	0.973353259
ENSMUSG00000022257	Laptm4b	lysosomal-associated protein transmembrane 4B	11.09977789	11.34796677	11.21044347	11.34819612	11.05068479	10.9466802	11.16584848	11.01544452	11.25159606	11.0446645	-0.206931564	0.015892105	0.181299493
ENSMUSG00000022255	Mtdh	metadherin	10.36138403	10.04481663	10.19676171	10.22926339	10.32098846	10.30924938	10.07130951	10.16565372	10.20805644	10.21680027	0.008743825	0.927441171	0.9978586
ENSMUSG00000029283	Cdc7	cell division cycle 7 (S. cerevisiae)	9.254746515	9.281674403	9.17765254	9.083517817	9.273752464	8.952524145	9.210315888	9.287450754	9.199397819	9.181010813	-0.018387006	0.883953327	0.982820377
ENSMUSG00000031007	Atp6ap2	ATPase, H+ transporting, lysosomal accessory protein 2	12.36143697	12.68418136	12.87279767	12.43067512	12.54831471	12.69529664	12.66481772	12.34247561	12.58727278	12.56272617	-0.02454661	0.791751377	0.973353259
ENSMUSG00000068860	Gm128	predicted gene 128	2.66033993	0	3.71322647	0	0	3.22524116	3.459970513	0	1.5933916	1.671302918	0.077911318	0.976804928	0.9978586
ENSMUSG00000017288	Vps53	VPS53 GARP complex subunit	10.85315376	10.76648286	11.03888127	10.86380967	10.65082906	10.92762996	10.83374609	10.60386114	10.88058189	10.75401656	-0.126565324	0.210824697	0.732425373
ENSMUSG00000028882	Ppp1r8	protein phosphatase 1, regulatory (inhibitor) subunit 8	9.686068622	9.691239404	9.658973741	9.422809593	9.748436078	9.560649682	9.622033434	9.590009973	9.61477284	9.630282292	0.015509452	0.896585832	0.987952905
ENSMUSG00000028883	Sema3a	sema domain, immunoglobulin domain (Ig), short basic domain, secreted, (semaphorin) 3A	9.848114056	9.360068823	9.891007123	9.646806387	9.476609223	9.790272928	9.75788949	9.043528628	9.686499097	9.517075067	-0.16942403	0.349788636	0.892350309
ENSMUSG00000028884	Rpa2	replication protein A2	7.972264918	7.550107346	7.687214987	7.855284053	8.141378773	7.785627986	7.91347965	7.877017106	7.766217826	7.929375879	0.163158053	0.268292497	0.812265089
ENSMUSG00000028885	Smpdl3b	sphingomyelin phosphodiesterase, acid-like 3B	6.019298013	5.201982679	3.71322647	3.882583475	7.104958499	6.861143733	6.259020203	6.178210492	4.704272659	6.600833232	1.896560573	0.000110285	0.005387405
ENSMUSG00000028886	Eya3	EYA transcriptional coactivator and phosphatase 3	10.21790794	10.20528895	10.36430234	10.18407241	9.950950071	10.11649541	10.31486083	10.18667907	10.24289291	10.14224635	-0.100646563	0.311878375	0.858514978
ENSMUSG00000088217	Gm22079	predicted gene, 22079	1.04569736	1.635246308	0	1.040994419	1.58961773	1.809634363	1.688464829	0.994123999	0.930484522	1.52046023	0.589975708	0.521351918	0.965516704
ENSMUSG00000028889	Yrdc	yrdC domain containing (E.coli)	8.841333213	8.89480112	9.058605529	8.731712164	8.904808087	8.974248352	9.157938671	8.685219985	8.881613006	8.930553773	0.048940767	0.67832315	0.969741274
ENSMUSG00000034636	Zyg11b	zyg-ll family member B, cell cycle regulator	12.41246609	12.71094339	12.88473296	12.43316041	12.3376127	12.55096787	12.42081608	12.41710966	12.61032571	12.43162658	-0.178699133	0.091761422	0.500174963
ENSMUSG00000088212	Gm22082	predicted gene, 22082	1.04569736	0	2.819232083	1.040994419	0	0.875920088	0	0.994123999	1.226480966	0.467511022	-0.758969944	0.268753443	0.812368363
ENSMUSG00000034634	Ly6d	lymphocyte antigen 6 complex, locus D	4.084528611	2.64754811	3.135647341	4.075933197	2.590779194	4.607921302	1.688464829	1.991176999	3.485914315	2.719585581	-0.766328734	0.610559022	0.969741274
ENSMUSG00000048562	Sp8	trans-acting transcription factor 8	6.154778065	6.956808706	6.151740444	6.308625971	7.657994285	5.578032191	9.132448677	8.422886368	6.392988296	7.69784038	1.304852084	0.010202526	0.137469236
ENSMUSG00000102411	Gm36936	predicted gene, 36936	5.946467619	6.944525096	1.846484642	7.04601118	6.546061189	6.457110348	5.673006494	6.782746354	5.445872134	6.364731096	0.918858962	0.914134317	0.994763903
ENSMUSG00000102413	Gm36937	predicted gene, 36937	5.642723023	5.358315736	6.30171295	6.1882405	5.29220096	5.933875306	5.608732751	6.075860683	5.872748052	5.727667425	-0.145080628	0.559614479	0.965516704
ENSMUSG00000102414	Gm36938	predicted gene, 36938	0	0	1.846484642	0	0	1.417032207	0	0	0.46162116	0.354258052	-0.107363109	0.882074359	0.982236649
ENSMUSG00000102416	4933424G06Rik	RIKEN cDNA 4933424G06 gene	3.783704699	2.64754811	3.973791331	2.061062922	3.006106913	2.775313294	4.049800494	4.689118391	3.116526765	3.630084773	0.513558008	0.398600429	0.925901209
ENSMUSG00000102417	Gm36939	predicted gene, 36939	0	0	0	0	0	1.809634363	0	0	0	0.452408591	0.452408591	0.609425585	0.969741274
ENSMUSG00000102418	Sh2d1b1	SH2 domain containing 1B1	0	0	0	2.061062922	0	0	0	0	0.51526573	0	-0.51526573	0.540781741	0.965516704
ENSMUSG00000102419	Gm36940	predicted gene, 36940	0	0	0	0	1.003492829	0	0	0	0	0.250873207	0.250873207	0.846512451	0.973353259
ENSMUSG00000029420	Rimbp2	RIMS binding protein 2	12.89511866	12.62936014	13.10265753	12.69899963	12.13368014	12.71335043	12.65166929	12.84406736	12.83153399	12.5856918	-0.245842185	0.114420678	0.556839159
ENSMUSG00000029423	Piwil1	piwi-like RNA-mediated gene silencing 1	0	2.05644782	0	0	0	2.37180711	2.713220414	0	0.514111955	1.271256881	0.757144926	0.429716898	0.939803016
ENSMUSG00000029422	Rsrc2	arginine/serine-rich coiled-coil 2	11.05212089	10.67464929	10.8974651	10.53920681	10.71346908	10.85727767	10.8053509	10.82822149	10.79086052	10.80107978	0.01021926	0.982728951	0.9978586
ENSMUSG00000029427	Zcchc8	zinc finger, CCHC domain containing 8	10.13839608	10.12592365	9.703079756	10.31680508	10.12720885	9.827880308	9.810628127	10.11880508	10.07105114	9.97113059	-0.099920551	0.425013433	0.93752711
ENSMUSG00000029426	Scarb2	scavenger receptor class B, member 2	11.91134287	11.95319819	11.81248872	11.79979367	11.82994439	11.78325055	11.73938858	11.98681729	11.86920587	11.8348502	-0.034355662	0.683359096	0.969741274
ENSMUSG00000029428	Stx2	syntaxin 2	9.095446393	9.308282013	9.17765254	9.347514974	9.360113406	9.271921963	9.412102891	9.655350053	9.23222398	9.424872078	0.192648098	0.079842417	0.467541724
ENSMUSG00000035582	Gdpd4	glycerophosphodiester phosphodiesterase domain containing 4	1.645576219	0	2.41333609	0	0	0.875920088	4.392881974	3.448730115	1.014728077	2.179383044	1.164654967	0.104880618	0.534278538
ENSMUSG00000035580	Kcnh8	potassium voltage-gated channel, subfamily H (eag-related), member 8	1.645576219	3.876923321	2.986096998	2.876933903	4.094030572	4.33693292	4.31445375	2.312514971	2.84638261	3.764483053	0.918100443	0.120006205	0.570538882
ENSMUSG00000035585	Tsen34	tRNA splicing endonuclease subunit 34	9.431931822	9.35775477	10.10110795	10.26194062	10.27609826	9.977601632	10.28174959	9.501967738	9.788183789	10.00935431	0.221170516	0.488238308	0.965516704
ENSMUSG00000025701	Alox5	arachidonate 5-lipoxygenase	4.255061632	4.157952906	4.385735942	4.600995203	4.094030572	4.607921302	4.049800494	5.076034537	4.349936421	4.456946726	0.107010306	0.656358657	0.969741274
ENSMUSG00000025702	8-Mar	membrane-associated ring finger (C3HC4) 8	10.50883459	10.85610171	8.949194621	10.56461695	9.17689014	9.100338655	10.47553758	10.88380546	10.21968697	9.909142959	-0.310544009	0.649533281	0.969741274
ENSMUSG00000034987	Hrh2	histamine receptor H2	9.54724836	9.183175826	9.27960729	9.756716991	8.250128235	9.193832536	9.03798607	8.709351175	9.441687117	8.797824504	-0.643862613	0.001023423	0.028680994
ENSMUSG00000034981	Parm1	prostate androgen-regulated mucin-like protein 1	10.82718782	11.00696086	11.21937284	10.48167736	10.52365742	10.89129754	10.60679195	10.53705377	10.88379972	10.63970017	-0.24409955	0.071646238	0.442520883
ENSMUSG00000021635	Rad17	RAD17 checkpoint clamp loader component	8.824496398	8.788855389	8.769179831	8.669366471	8.817533356	8.623401937	8.675764283	8.632109717	8.762974522	8.687202323	-0.075772199	0.45385394	0.956861716
ENSMUSG00000021636	Marveld2	MARVEL (membrane-associating) domain containing 2	4.944961085	4.826969182	5.255976772	5.032513649	5.094235333	5.389695085	5.235793501	4.381104338	5.015105172	5.025207064	0.010101892	0.877634039	0.981340187
ENSMUSG00000032679	Cd59a	CD59a antigen	7.327818446	6.981066551	5.255976772	6.327748599	6.801330382	6.961233899	6.705643439	6.464090248	6.473152592	6.733074492	0.2599219	0.798631013	0.973353259
ENSMUSG00000021638	Ocln	occludin	8.511801979	8.312946802	8.040120183	8.069231167	8.083767041	7.880716431	8.306905806	7.988270154	8.233525033	8.064914858	-0.168610175	0.246445966	0.78190728
ENSMUSG00000021639	Gtf2h2	general transcription factor II H, polypeptide 2	8.871153008	8.625335832	8.774891723	8.74244002	8.978506912	9.073752505	9.112307	8.873945338	8.753455146	9.009627939	0.256172793	0.013804891	0.165972283
ENSMUSG00000032673	Prorsd1	prolyl-tRNA synthetase domain containing 1	7.020013646	6.24369585	5.882213448	5.807292156	6.346741293	6.18636818	5.704100511	6.19783711	6.238303775	6.108761774	-0.129542001	0.509027176	0.965516704
ENSMUSG00000032586	Traip	TRAF-interacting protein	8.499125905	8.151329054	8.399360305	8.102921439	9.254893288	9.124286254	9.138152168	8.646464717	8.288184176	9.040949107	0.752764931	4.79E-07	7.49E-05
ENSMUSG00000074151	Nlrc5	NLR family, CARD domain containing 5	4.333320076	4.879533179	4.657152062	4.985123232	5.788210379	4.505549955	5.904799339	5.603175101	4.713782137	5.450433693	0.736651556	0.021120684	0.216636323
ENSMUSG00000032582	Rbm6	RNA binding motif protein 6	10.83981035	10.48729978	10.47370812	10.68535881	10.72550597	10.60526837	10.59647145	10.55523713	10.62154426	10.62062073	-0.000923532	0.943580245	0.9978586
ENSMUSG00000032583	Mon1a	MON1 homolog A, secretory traffciking associated	9.434153269	9.598246335	9.851009523	9.55445124	9.563474034	9.582816261	9.559650356	9.3762589	9.609465092	9.520549888	-0.088915204	0.38040885	0.914778655
ENSMUSG00000032580	Rbm5	RNA binding motif protein 5	12.12408193	12.03874495	11.93265367	12.0934616	12.03902129	11.96029145	12.00196172	12.3638087	12.04723553	12.09127079	0.044035257	0.610612731	0.969741274
ENSMUSG00000111569	CT025665.1	---	2.068014459	0	0	0	0	0	0	0	0.517003615	0	-0.517003615	0.539180863	0.965516704
ENSMUSG00000074158	Zfp976	zinc finger protein 976	6.830642994	6.302630055	6.220326163	6.522895485	6.482632445	6.550050587	6.837689855	6.907184922	6.469123674	6.694389452	0.225265778	0.291606633	0.840708399
ENSMUSG00000032589	Bsn	bassoon	14.66019949	14.94514569	15.21398464	15.02616025	14.24672455	14.82193869	14.6954403	14.67707572	14.96137252	14.61029482	-0.351077702	0.0175255	0.192277211
ENSMUSG00000086192	Gm13609	predicted gene 13609	0	0	0	0	0	0	0	1.577122502	0	0.394280625	0.394280625	0.681264798	0.969741274
ENSMUSG00000042002	Foxn4	forkhead box N4	0	0	0	0	0	1.809634363	0	0	0	0.452408591	0.452408591	0.609425585	0.969741274
ENSMUSG00000046186	Cd109	CD109 antigen	5.445414159	4.930249163	4.500498474	4.163686085	5.051160406	3.567705506	2.445268757	5.573432784	4.75996197	4.159391864	-0.600570107	0.68292344	0.969741274
ENSMUSG00000045052	Prlhr	prolactin releasing hormone receptor	0	2.05644782	0	0	3.465775941	0	2.115933218	0	0.514111955	1.39542729	0.881315335	0.290509818	0.839748371
ENSMUSG00000045053	Kcng3	potassium voltage-gated channel, subfamily G, member 3	3.403168963	3.876923321	3.509051426	3.982495002	3.006106913	2.775313294	2.713220414	3.311334	3.692909678	2.951493655	-0.741416023	0.123468345	0.57665261
ENSMUSG00000086193	Gm11508	predicted gene 11508	0	1.037876205	2.157573411	2.061062922	1.58961773	0	0	1.991176999	1.314128134	0.895198682	-0.418929452	0.692967196	0.969790678
ENSMUSG00000082964	Rpl13-ps5	ribosomal protein L13, pseudogene 5	1.645576219	2.64754811	0	2.386971434	0	0	2.445268757	1.577122502	1.670023941	1.005597815	-0.664426126	0.550869591	0.965516704
ENSMUSG00000114588	AC154572.1	---	2.068014459	0	0	0	2.005236078	0	0	3.311334	0.517003615	1.329142519	0.812138905	0.340148812	0.881652462
ENSMUSG00000114583	AC160109.1	---	0	0	0	0	0	1.417032207	0	0	0	0.354258052	0.354258052	0.70871864	0.96988229
ENSMUSG00000114585	CT025639.2	---	0	0	0	0	2.005236078	0.875920088	0	2.575155827	0	1.364077998	1.364077998	0.111679927	0.550807059
ENSMUSG00000114584	AC131687.1	---	8.365834537	7.855811812	7.77533494	8.135842885	7.700430555	7.921046336	7.627515569	7.924910167	8.033206044	7.793475657	-0.239730387	0.120995335	0.572735017
ENSMUSG00000030880	Polr3e	polymerase (RNA) III (DNA directed) polypeptide E	9.64446442	10.00248654	9.431980871	10.02329068	9.855592614	10.00600212	9.941965883	9.711045491	9.775555627	9.878651527	0.1030959	0.524067468	0.965516704
ENSMUSG00000117585	---	---	0	0	0	0	0	0.875920088	0	0	0	0.218980022	0.218980022	0.846512451	0.973353259
ENSMUSG00000087294	Gm13556	predicted gene 13556	0	0	0	0	0	0	0	2.575155827	0	0.643788957	0.643788957	0.425793562	0.93752711
ENSMUSG00000117580	---	---	0	1.635246308	1.449333651	0	0	0	0	1.991176999	0.77114499	0.49779425	-0.27335074	0.882495709	0.982431661
ENSMUSG00000087293	Gm14341	predicted gene 14341	0	2.05644782	0	3.533121572	0	2.117931851	0	0	1.397392348	0.529482963	-0.867909385	0.312319249	0.858745862
ENSMUSG00000033985	Tesk2	testis-specific kinase 2	7.473173375	7.636640175	7.132689142	7.564232514	7.553834461	7.642213397	7.751762109	7.389173367	7.451683801	7.584245833	0.132562032	0.417676383	0.934544172
ENSMUSG00000033987	Dnah17	dynein, axonemal, heavy chain 17	6.612604945	6.549697743	5.923939562	6.780539531	6.433161041	7.027381966	6.765827373	6.480208437	6.466695445	6.676644704	0.209949259	0.379590519	0.913918903
ENSMUSG00000033981	Gria2	glutamate receptor, ionotropic, AMPA2 (alpha 2)	14.23456536	14.04874524	14.19047601	14.08647586	13.96208176	14.06378745	14.09253311	14.03142288	14.14006562	14.0374563	-0.102609317	0.169999923	0.668522551
ENSMUSG00000033983	Coil	coilin	8.975503503	9.017149773	9.158116926	9.105844718	9.156712088	9.332981596	9.188493638	9.07305413	9.06415373	9.187810363	0.123656633	0.206144033	0.725462255
ENSMUSG00000087299	Gm12953	predicted gene 12953	3.991054272	3.769606182	4.385735942	5.570960747	3.328209112	4.076249871	3.949570471	4.689118391	4.429339286	4.010786961	-0.418552324	0.274796387	0.820763608
ENSMUSG00000088969	Gm22085	predicted gene, 22085	1.04569736	0	0	0	0	0	0	0	0.26142434	0	-0.26142434	0.830018289	0.973353259
ENSMUSG00000030887	Pdzd9	PDZ domain containing 9	4.545452185	5.116967398	3.394994784	4.721563563	4.591649679	3.090278098	4.467265589	3.159462173	4.444744482	3.827163885	-0.617580598	0.234144983	0.766026366
ENSMUSG00000020955	Ap4s1	adaptor-related protein complex AP-4, sigma 1	9.467070919	9.594320362	9.551601745	9.50070147	9.346816485	9.663776478	9.478799786	9.180536993	9.528423624	9.417482436	-0.110941189	0.375826283	0.911822278
ENSMUSG00000086527	Gm15856	predicted gene 15856	4.172313377	2.05644782	3.135647341	2.876933903	0	3.348651568	2.115933218	2.797267076	3.06033561	2.065462966	-0.994872645	0.301695796	0.851040028
ENSMUSG00000044098	Rsbn1	rosbin, round spermatid basic protein 1	10.25482252	9.869117195	9.689535422	9.742537106	9.627188204	9.814561357	9.630151029	9.619415933	9.88900306	9.672829131	-0.216173929	0.072995166	0.445934106
ENSMUSG00000086524	Pabpc1l2a-ps	poly(A) binding protein, cytoplasmic 1-like 2A, pseudogene	7.628681277	7.894639858	8.109570596	7.842044916	8.023758636	8.080884289	7.879833127	7.942467955	7.868734161	7.981736002	0.11300184	0.453206004	0.956861716
ENSMUSG00000086522	Gm4473	predicted gene 4473	0	2.8716894	0	0	1.58961773	2.117931851	0	1.991176999	0.71792235	1.424681645	0.706759295	0.809995316	0.973353259
ENSMUSG00000044092	C130050O18Rik	RIKEN cDNA C130050O18 gene	5.087262684	3.653659897	4.606800808	5.078396742	5.051160406	4.995556428	4.731512262	3.574171483	4.606530033	4.588100145	-0.018429888	0.975646078	0.9978586
ENSMUSG00000086529	Acss2os	acyl-CoA synthetase short-chain family member 2, opposite strand	0	3.06564474	0	2.876933903	2.813337462	2.587621499	2.713220414	1.577122502	1.485644661	2.422825469	0.937180809	0.677127242	0.969741274
ENSMUSG00000117059	---	---	0	0	0	0	0	0	0	1.991176999	0	0.49779425	0.49779425	0.56486706	0.965516704
ENSMUSG00000117056	---	---	0	2.05644782	0	0	0	2.587621499	0	0	0.514111955	0.646905375	0.13279342	0.802617254	0.973353259
ENSMUSG00000117055	---	---	2.884829173	2.64754811	2.630511888	0	0	1.809634363	3.725440712	3.311334	2.040722293	2.211602269	0.170879976	0.65186184	0.969741274
ENSMUSG00000117050	---	---	3.079044871	3.876923321	3.892055946	4.885399987	4.176515485	3.925812223	4.31445375	4.796001121	3.933356031	4.303195645	0.369839614	0.5566083	0.965516704
ENSMUSG00000075284	Wipf1	WAS/WASL interacting protein family, member 1	8.969389596	8.993496056	8.48548361	8.825506623	9.02098423	9.019063668	8.824666256	9.354564096	8.818468971	9.054819562	0.236350591	0.104851981	0.534278538
ENSMUSG00000075289	Carns1	carnosine synthase 1	7.884014416	8.145974816	7.699279968	7.230049355	8.553853072	8.192180158	7.361070502	8.231436973	7.739829639	8.084635176	0.344805538	0.119544287	0.568851171
ENSMUSG00000111143	AC164612.1	---	1.645576219	2.382061721	1.449333651	0	1.58961773	1.809634363	2.115933218	1.577122502	1.369242898	1.773076953	0.403834055	0.805394068	0.973353259
ENSMUSG00000024941	Scyl1	SCY1-like 1 (S. cerevisiae)	10.60168448	10.55147846	10.68790491	10.56058129	10.49481241	10.43119904	10.5415814	10.43841267	10.60041229	10.47650138	-0.123910906	0.082411293	0.475407362
ENSMUSG00000024940	Ltbp3	latent transforming growth factor beta binding protein 3	10.67301748	10.36243748	10.25002087	10.89298966	10.60409416	10.63588054	10.66227155	10.64017993	10.54461637	10.63560654	0.090990172	0.591196791	0.969741274
ENSMUSG00000024943	Smc5	structural maintenance of chromosomes 5	10.10532234	9.669013723	9.849656982	9.960355862	9.665180091	9.675611647	9.964612092	10.02440884	9.896087228	9.832453168	-0.06363406	0.606140152	0.969741274
ENSMUSG00000024942	Capn1	calpain 1	9.636769407	9.576520061	9.66667507	9.774248077	9.301586888	9.503695769	9.369098338	9.339181256	9.663553154	9.378390563	-0.285162591	0.001663448	0.04010368
ENSMUSG00000024944	Arl2	ADP-ribosylation factor-like 2	10.06288456	10.05485082	10.15794698	10.0807793	10.10894656	10.04530253	10.22392365	10.10587771	10.08911541	10.12101261	0.031897197	0.685413504	0.969741274
ENSMUSG00000024947	Men1	multiple endocrine neoplasia 1	10.21274133	9.748886465	9.943936787	9.798439121	9.931782566	9.831852134	9.974209836	9.764670482	9.926000927	9.875628754	-0.050372172	0.599912644	0.969741274
ENSMUSG00000021936	Mapk8	mitogen-activated protein kinase 8	11.56315928	11.63652456	11.9383911	11.33289789	11.5271024	11.5232348	11.70905385	11.6203141	11.61774321	11.59492629	-0.02281692	0.750520396	0.973353259
ENSMUSG00000024949	Sf1	splicing factor 1	11.95105504	11.8342345	12.04031795	12.06774534	11.74337711	12.11904597	12.0740276	12.05666914	11.97333821	11.99827996	0.024941746	0.76544363	0.973353259
ENSMUSG00000024948	Map4k2	mitogen-activated protein kinase kinase kinase kinase 2	11.37246587	11.40342999	11.28438727	11.46992029	11.48523881	11.3881526	11.41756597	11.58488345	11.38255085	11.46896021	0.086409354	0.255239733	0.792226009
ENSMUSG00000079614	Seh1l	SEH1-like (S. cerevisiae	9.900466066	10.0142884	9.875140901	9.789845953	9.998492232	9.949849618	9.828375868	9.827440663	9.89493533	9.901039595	0.006104265	0.940733092	0.9978586
ENSMUSG00000059534	Uqcr10	ubiquinol-cytochrome c reductase, complex III subunit X	9.431931822	9.931130311	9.859098247	9.810384212	10.2453762	9.68442474	9.679876649	9.664195455	9.758136148	9.818468261	0.060332113	0.645305369	0.969741274
ENSMUSG00000021932	Rnaseh2b	ribonuclease H2, subunit B	6.883621272	7.613550341	7.040857681	6.723925744	6.852406748	6.56285217	7.128726103	7.354617841	7.065488759	6.974650715	-0.090838044	0.657025482	0.969741274
ENSMUSG00000087433	Gm14167	predicted gene 14167	1.645576219	0	1.846484642	1.040994419	2.813337462	1.417032207	0	0.994123999	1.13326382	1.306123417	0.172859597	0.692240372	0.969790678
ENSMUSG00000051727	Kctd14	potassium channel tetramerisation domain containing 14	5.373155087	4.826969182	5.154468919	5.288182697	5.650694198	4.995556428	6.674583019	6.075860683	5.160693971	5.849173582	0.688479611	0.021286701	0.217592247
ENSMUSG00000051726	Kcnf1	potassium voltage-gated channel, subfamily F, member 1	11.68708485	12.31227706	12.62654899	11.90420163	12.26023238	12.16568575	12.49269621	12.07436291	12.13252813	12.24824431	0.115716178	0.647475362	0.969741274
ENSMUSG00000051721	Wdcp	WD repeat and coiled coil containing	8.821105327	8.957272039	8.791892954	8.763659341	8.346805743	8.790541452	8.824666256	8.358947096	8.833482415	8.580240137	-0.253242279	0.084162905	0.480243106
ENSMUSG00000087437	Gm13112	predicted gene 13112	2.068014459	0	0	3.659250993	3.006106913	3.462332101	4.31445375	3.988962792	1.431816363	3.692963889	2.261147526	0.047429892	0.350211003
ENSMUSG00000051723	Rpl31-ps13	ribosomal protein L31, pseudogene 13	0	1.037876205	1.449333651	1.040994419	1.003492829	1.417032207	1.078314528	0	0.882051069	0.874709891	-0.007341178	0.987720006	0.9978586
ENSMUSG00000087435	Gm16323	predicted gene 16323	6.747339025	6.760576199	6.626311638	6.794352535	6.364444342	6.37238547	6.543188415	6.19783711	6.732144849	6.369463834	-0.362681015	0.044326056	0.338602783
ENSMUSG00000043843	Tmem145	transmembrane protein 145	11.0550107	10.60221103	10.74866969	11.30603068	10.01679909	10.61452042	10.45397732	10.3740952	10.92798053	10.36484801	-0.56313252	0.000291561	0.011532363
ENSMUSG00000079610	Ankrd39	ankyrin repeat domain 39	7.540704085	8.046036575	7.879742295	8.091778536	7.546098612	7.555201841	7.643644278	7.954055547	7.889565373	7.67475007	-0.214815303	0.174551773	0.676297211
ENSMUSG00000051729	Gm5087	predicted gene 5087	2.66033993	2.8716894	1.846484642	0	2.32751257	0	3.598803161	3.311334	1.844628493	2.309412433	0.46478394	0.485335956	0.964796561
ENSMUSG00000051728	4930563D23Rik	RIKEN cDNA 4930563D23 gene	2.068014459	0	0	0	0	0	0	0	0.517003615	0	-0.517003615	0.539180863	0.965516704
ENSMUSG00000080801	Gm13310	predicted gene 13310	0	0	0	1.040994419	0	0	1.688464829	0	0.260248605	0.422116207	0.161867602	0.823077746	0.973353259
ENSMUSG00000080806	Gm13005	predicted gene 13005	1.645576219	1.635246308	1.449333651	3.070993449	2.32751257	3.348651568	0	3.574171483	1.950287407	2.312583905	0.362296499	0.370895816	0.908595325
ENSMUSG00000080807	Gm13117	predicted gene 13117	1.645576219	1.037876205	3.271140962	2.652653363	0	0.875920088	2.713220414	2.797267076	2.151811687	1.596601894	-0.555209793	0.643485494	0.969741274
ENSMUSG00000005615	Pcyt1a	phosphate cytidylyltransferase 1, choline, alpha isoform	8.4206375	8.81944735	8.677625448	8.770663655	10.14268032	8.551361409	10.11534677	8.674753193	8.672093488	9.371035424	0.698941936	0.040434008	0.322260558
ENSMUSG00000005610	Eif4g2	eukaryotic translation initiation factor 4, gamma 2	14.10531425	14.08810167	14.21208322	14.03532011	13.93095414	14.12252297	13.96626681	13.93394287	14.11020481	13.9884217	-0.121783111	0.129395179	0.589032246
ENSMUSG00000005611	Mrvi1	MRV integration site 1	6.718466702	6.788334674	6.781905104	6.766592996	6.852406748	6.625209677	6.996826212	7.22670701	6.763824869	6.925287412	0.161462543	0.335438578	0.8786441
ENSMUSG00000090665	Gad1-ps	glutamate decarboxylase 1, pseudogene	4.172313377	2.64754811	3.394994784	3.070993449	3.591359576	3.090278098	1.688464829	2.575155827	3.32146243	2.736314582	-0.585147848	0.366280565	0.905902412
ENSMUSG00000040576	Wbscr28	Williams-Beuren syndrome chromosome region 28 (human)	0	1.037876205	0	0	0	0	0	0	0.259469051	0	-0.259469051	0.830018289	0.973353259
ENSMUSG00000040570	Rundc3b	RUN domain containing 3B	9.834723739	9.804318302	10.1513751	9.769011083	10.01679909	10.1305369	9.948472583	9.729704766	9.889857056	9.956378335	0.066521279	0.584212297	0.969741274
ENSMUSG00000051098	Mblac2	metallo-beta-lactamase domain containing 2	9.922785937	9.949687134	10.17208417	9.770758861	9.48876692	9.687350515	10.09935542	9.550482031	9.953829026	9.706488722	-0.247340303	0.094357321	0.507295483
ENSMUSG00000051095	Olfr986	olfactory receptor 986	0	0	0	0	0	1.417032207	0	0	0	0.354258052	0.354258052	0.70871864	0.96988229
ENSMUSG00000082520	Gm13349	predicted gene 13349	1.645576219	0	0	0	0	0	0	0	0.411394055	0	-0.411394055	0.662772563	0.969741274
ENSMUSG00000044231	Nhlrc1	NHL repeat containing 1	8.540953413	8.86578177	8.852570836	8.564452206	9.149071961	8.892940937	8.933626445	8.722961343	8.705939556	8.924650172	0.218710615	0.093261142	0.503449289
ENSMUSG00000046934	Csl	citrate synthase like	1.645576219	0	1.449333651	0	0	0.875920088	1.078314528	0	0.773727468	0.488558654	-0.285168814	0.674196359	0.969741274
ENSMUSG00000102526	Gm37785	predicted gene, 37785	4.894227342	4.24065392	4.885501747	4.536709089	3.176128642	4.276043866	3.841853679	4.743549337	4.639273025	4.009393881	-0.629879144	0.176951175	0.679218452
ENSMUSG00000026548	Slamf9	SLAM family member 9	6.197251107	4.24065392	3.271140962	2.061062922	3.813834889	2.775313294	4.538001383	4.895508649	3.942527228	4.005664554	0.063137326	0.456127746	0.956861716
ENSMUSG00000102241	Gm37716	predicted gene, 37716	2.884829173	1.635246308	1.846484642	2.061062922	0	3.66590362	2.115933218	0	2.106905761	1.44545921	-0.661446551	0.929758137	0.9978586
ENSMUSG00000026542	Apcs	serum amyloid P-component	0	3.389405204	0	0	0	0	0	0	0.847351301	0	-0.847351301	0.215623776	0.740064675
ENSMUSG00000026547	Tagln2	transgelin 2	8.715479546	8.005222027	7.814685317	8.255509662	7.80784591	7.83395548	8.281361638	8.367637841	8.197724138	8.072700217	-0.125023921	0.481626823	0.964147298
ENSMUSG00000026546	Cfap45	cilia and flagella associated protein 45	6.197251107	6.732273137	6.393678892	5.664179491	6.346741293	6.457110348	6.610381059	7.439502644	6.246845657	6.713433836	0.466588179	0.093879708	0.505827253
ENSMUSG00000026544	Dusp23	dual specificity phosphatase 23	6.857375301	6.24369585	6.859217428	6.0103038	7.115451241	6.951531638	7.009328021	7.148177988	6.492648095	7.056122222	0.563474127	0.017153385	0.189655716
ENSMUSG00000059395	Nkapl	NFKB activating protein-like	2.068014459	3.653659897	1.449333651	2.061062922	3.706881428	1.417032207	2.115933218	3.311334	2.308017732	2.637795213	0.329777481	0.637417778	0.969741274
ENSMUSG00000100104	Gm5644	predicted gene 5644	1.04569736	0	1.846484642	1.639366891	3.176128642	1.417032207	2.115933218	1.577122502	1.132887223	2.071554142	0.938666919	0.247373336	0.782659637
ENSMUSG00000090779	Gm17110	predicted gene 17110	3.250190284	3.876923321	1.846484642	3.659250993	2.32751257	0	2.115933218	3.988962792	3.15821231	2.108102145	-1.050110165	0.421162748	0.93752711
ENSMUSG00000107335	Gm43372	predicted gene 43372	4.609755403	2.8716894	3.71322647	4.83282835	4.76160691	3.462332101	3.30634127	3.988962792	4.006874906	3.879810768	-0.127064137	0.701239217	0.96988229
ENSMUSG00000000326	Comt	catechol-O-methyltransferase	11.20564622	11.05274264	11.22198864	11.05451435	11.11222784	11.22909921	11.15322946	10.81000448	11.13372296	11.07614025	-0.057582712	0.612839088	0.969741274
ENSMUSG00000112914	AC118230.1	---	2.66033993	0	0.899492338	1.040994419	3.006106913	0	2.445268757	1.577122502	1.150206672	1.757124543	0.606917871	0.507261896	0.965516704
ENSMUSG00000112915	CT025606.2	---	1.645576219	2.05644782	1.449333651	0	0	0	0	0	1.287839423	0	-1.287839423	0.171705572	0.672248479
ENSMUSG00000101397	Mug-ps1	murinoglobulin, pseudogene 1	0	0	0	0	0	0	1.688464829	2.575155827	0	1.065905164	1.065905164	0.244256447	0.779432748
ENSMUSG00000003617	Cp	ceruloplasmin	9.190495005	8.948072115	8.887261945	8.900861076	8.269049396	8.355591779	8.557310119	9.062387367	8.981672535	8.561084665	-0.42058787	0.019183337	0.203771087
ENSMUSG00000007107	Atp1a4	ATPase, Na+/K+ transporting, alpha 4 polypeptide	0	2.05644782	0	0	0	0	0	0	0.514111955	0	-0.514111955	0.541846636	0.965516704
ENSMUSG00000098329	Mir6966	microRNA 6966	1.04569736	1.037876205	0.899492338	1.040994419	1.003492829	0.875920088	1.078314528	0.994123999	1.00601508	0.987962861	-0.018052219	0.981393144	0.9978586
ENSMUSG00000098326	Dlx6os1	distal-less homeobox 6, opposite strand 1	0	0	0	0	0	0	2.445268757	0.994123999	0	0.859848189	0.859848189	0.369393311	0.906718921
ENSMUSG00000098327	Mir7087	microRNA 7087	2.394364844	1.635246308	1.846484642	1.639366891	2.005236078	2.117931851	2.713220414	2.312514971	1.878865671	2.287225828	0.408360157	0.56045687	0.965516704
ENSMUSG00000118060	---	---	0	0	0	2.386971434	0	0	0	0	0.596742858	0	-0.596742858	0.461430773	0.956861716
ENSMUSG00000098325	Mir7048	microRNA 7048	1.04569736	1.037876205	1.449333651	1.639366891	1.58961773	0.875920088	1.078314528	1.577122502	1.293068527	1.280243712	-0.012824815	0.989387895	0.9978586
ENSMUSG00000098322	5830468F06Rik	RIKEN cDNA 5830468F06 gene	2.068014459	0	2.41333609	0	1.58961773	0	1.688464829	0	1.120337637	0.81952064	-0.300816997	0.640942435	0.969741274
ENSMUSG00000098320	Vis1	viral integration site 1	0	0	0	1.639366891	1.003492829	3.090278098	0	0.994123999	0.409841723	1.271973732	0.862132009	0.266263955	0.80921122
ENSMUSG00000117671	---	---	0	2.05644782	0	0	2.005236078	1.417032207	1.688464829	2.312514971	0.514111955	1.855812021	1.341700066	0.24338482	0.778307609
ENSMUSG00000084275	Gm5396	predicted pseudogene 5396	0	0	1.449333651	0	0	0	0	0	0.362333413	0	-0.362333413	0.692015925	0.969741274
ENSMUSG00000084274	Gm12504	predicted pseudogene 12504	3.991054272	4.595173254	4.798449417	4.398847215	3.913403719	3.462332101	4.538001383	4.381104338	4.445881039	4.073710385	-0.372170654	0.354604625	0.896484384
ENSMUSG00000084277	Gm11702	predicted gene 11702	1.04569736	1.635246308	0.899492338	1.040994419	1.003492829	1.417032207	1.078314528	0	1.155357606	0.874709891	-0.280647715	0.799487642	0.973353259
ENSMUSG00000084276	Gm8317	predicted gene 8317	0	0	0	1.040994419	0	0	0	0	0.260248605	0	-0.260248605	0.830018289	0.973353259
ENSMUSG00000084271	Gm14846	predicted gene 14846	0	1.037876205	0	0	0	0	0	0.994123999	0.259469051	0.248531	-0.010938052	0.991579818	0.9978586
ENSMUSG00000084279	Gm13232	predicted gene 13232	0	0	0	1.040994419	1.003492829	1.417032207	1.078314528	0.994123999	0.260248605	1.123240891	0.862992286	0.357353289	0.899370575
ENSMUSG00000033237	Arid2	AT rich interactive domain 2 (ARID, RFX-like)	10.6222886	10.62644311	10.54396551	10.61023344	10.29468403	10.46056882	10.5231739	10.40713934	10.60073266	10.42139152	-0.179341141	0.021463653	0.218818205
ENSMUSG00000094733	Gm5416	predicted gene 5416	0	0	0	0	2.32751257	0	0	1.577122502	0	0.976158768	0.976158768	0.317280738	0.860925682
ENSMUSG00000002059	Rab34	RAB34, member RAS oncogene family	8.33763209	8.167273564	7.869101158	8.352064621	8.820742947	8.344513879	8.33200555	8.565683748	8.181517858	8.515736531	0.334218672	0.029281331	0.267274834
ENSMUSG00000002058	Unc119	unc-119 lipid binding chaperone	8.144946006	8.61374629	8.175830702	8.490015735	7.788305298	8.053933812	8.26059558	8.393400309	8.356134683	8.12405875	-0.232075934	0.162306897	0.654311209
ENSMUSG00000002057	Foxn1	forkhead box N1	0	2.05644782	0	0	0	0	0	0	0.514111955	0	-0.514111955	0.541846636	0.965516704
ENSMUSG00000002055	Spag5	sperm associated antigen 5	9.672960605	9.623508006	9.45884229	10.2780058	8.96985928	9.147842823	9.149491948	9.525458281	9.758329176	9.198163083	-0.560166093	0.000875583	0.025556791
ENSMUSG00000002052	Supt6	suppressor of Ty 6	12.56393562	12.46171004	12.67775258	12.54793823	12.57516973	12.59836946	12.52380066	12.44560695	12.56283412	12.5357367	-0.027097418	0.704991888	0.96988229
ENSMUSG00000088555	Gm22098	predicted gene, 22098	1.04569736	0	0	0	1.003492829	0	1.078314528	0	0.26142434	0.520451839	0.259027499	0.831224128	0.973353259
ENSMUSG00000083728	Gm13854	predicted gene 13854	0	0	0	0	0	1.809634363	0	0	0	0.452408591	0.452408591	0.609425585	0.969741274
ENSMUSG00000002550	Uck1	uridine-cytidine kinase 1	9.652118606	9.899661789	9.823714805	9.932520028	9.916863071	10.03729832	10.01971956	9.876979688	9.827003807	9.96271516	0.135711353	0.145915023	0.623445224
ENSMUSG00000088552	Mir1957a	microRNA 1957a	1.04569736	2.382061721	0.899492338	1.040994419	1.58961773	0.875920088	1.078314528	0.994123999	1.34206146	1.134494086	-0.207567373	0.694280245	0.96988229
ENSMUSG00000036606	Plxnb2	plexin B2	10.83309208	10.97862721	10.90854949	11.19065116	11.21520864	10.96548216	11.12622123	11.25325771	10.97772999	11.14004244	0.16231245	0.112540005	0.552790629
ENSMUSG00000046062	Ppp1r15b	protein phosphatase 1, regulatory (inhibitor) subunit 15b	11.02068423	11.09225265	11.14026898	10.97183887	10.78176031	10.97149541	10.65929978	10.67034793	11.05626118	10.77072586	-0.285535323	0.002079063	0.047301277
ENSMUSG00000088559	Mir1981	microRNA 1981	1.04569736	1.037876205	1.449333651	1.040994419	1.58961773	1.417032207	1.688464829	0.994123999	1.143475409	1.422309691	0.278834282	0.721030069	0.973353259
ENSMUSG00000110702	Gm45767	predicted gene 45767	7.438184412	7.016705279	6.81554751	6.900339024	7.714303051	7.611736742	7.093932632	7.965550811	7.042694056	7.596380809	0.553686753	0.006398886	0.101496859
ENSMUSG00000097386	9130213A22Rik	RIKEN cDNA 9130213A22 gene	5.087262684	4.393062975	4.606800808	3.394899473	4.398963161	4.451504748	4.790648282	4.512299928	4.370506485	4.53835403	0.167847545	0.893394418	0.986579281
ENSMUSG00000110700	Gm5357	predicted gene 5357	0	0	0	0	0	1.809634363	0	0	0	0.452408591	0.452408591	0.609425585	0.969741274
ENSMUSG00000016356	Col20a1	collagen, type XX, alpha 1	6.971895105	7.566231562	7.150374269	7.780917718	7.514733619	7.66019507	7.341428284	7.821165841	7.367354664	7.584380703	0.21702604	0.320197701	0.864184546
ENSMUSG00000072407	Gm6419	predicted gene 6419	2.394364844	0	2.630511888	2.386971434	2.813337462	1.417032207	1.688464829	1.577122502	1.852962042	1.87398925	0.021027208	0.833533278	0.973353259
ENSMUSG00000081382	Rpl18-ps1	ribosomal protein L18, pseudogene 1	0	1.037876205	1.449333651	1.040994419	1.58961773	2.37180711	1.688464829	1.577122502	0.882051069	1.806753043	0.924701974	0.281099793	0.829423683
ENSMUSG00000081386	Gm15160	predicted gene 15160	0	0	0	2.061062922	2.005236078	1.809634363	0	0	0.51526573	0.95371761	0.43845188	0.724321521	0.973353259
ENSMUSG00000062074	Wisp3	WNT1 inducible signaling pathway protein 3	2.068014459	0	2.41333609	2.386971434	3.006106913	2.117931851	1.688464829	4.310743152	1.717080496	2.780811686	1.063731191	0.133004141	0.596748502
ENSMUSG00000064302	Clasp1	CLIP associating protein 1	11.77865258	11.37224395	11.58268099	11.74572354	11.18377069	11.69151241	11.18594978	11.140514	11.61982527	11.30043672	-0.319388542	0.022519963	0.226044761
ENSMUSG00000064307	Lrrc51	leucine rich repeat containing 51	5.33562142	5.596760178	5.410736395	4.985123232	5.937600451	5.139236278	5.957362703	5.414763677	5.332060306	5.612240777	0.280180471	0.297663525	0.845848813
ENSMUSG00000064308	2410137M14Rik	RIKEN cDNA 2410137M14 gene	3.079044871	0	2.41333609	4.163686085	1.58961773	2.37180711	1.688464829	2.797267076	2.414016761	2.111789186	-0.302227575	0.297211755	0.845305934
ENSMUSG00000115360	---	---	6.37427488	6.855480433	5.882213448	6.694763342	6.49875298	6.840264603	6.837689855	7.187976746	6.451683026	6.841171046	0.38948802	0.12275533	0.575898212
ENSMUSG00000078139	AK157302	cDNA sequence AK157302	8.208618804	7.842633384	8.319539725	8.173325171	8.226122386	8.07642736	7.859261995	7.681768045	8.136029271	7.960894947	-0.175134324	0.276537757	0.823456851
ENSMUSG00000107672	Gm3017	predicted gene 3017	0	0	0	0	0	0	1.688464829	0	0	0.422116207	0.422116207	0.668370292	0.969741274
ENSMUSG00000107677	Olfr316	olfactory receptor 316	5.174886192	6.321751672	6.663735945	5.912365933	6.814269997	4.95728372	6.642839144	6.19783711	6.018184936	6.153057493	0.134872557	0.629657642	0.969741274
ENSMUSG00000107675	Gm30332	predicted gene, 30332	2.66033993	0	0	0	0	1.809634363	0	1.991176999	0.665084982	0.95020284	0.285117858	0.974605414	0.9978586
ENSMUSG00000095377	Olfr91	olfactory receptor 91	0	2.382061721	0.899492338	0	0	2.775313294	1.688464829	1.991176999	0.820388515	1.61373878	0.793350266	0.457610243	0.956861716
ENSMUSG00000078134	Gm12355	predicted gene 12355	5.21677981	5.394888389	5.602810795	5.633770947	6.029237949	5.300789739	5.957362703	5.197996871	5.462062485	5.621346815	0.15928433	0.499734713	0.965516704
ENSMUSG00000078137	Ankrd63	ankyrin repeat domain 63	10.74098902	10.21299053	10.19356674	10.23560522	11.40945382	11.44846262	10.72045655	10.34468496	10.34578788	10.98076449	0.634976608	0.017868702	0.194665176
ENSMUSG00000082896	Gm5844	predicted gene 5844	8.411647023	8.350672696	8.391945798	7.738678251	8.259619834	8.224766655	8.082739628	8.070416639	8.223235942	8.159385689	-0.063850253	0.580507833	0.969741274
ENSMUSG00000082895	Rpsa-ps9	ribosomal protein SA, pseudogene 9	1.645576219	2.05644782	2.157573411	1.040994419	1.58961773	2.587621499	1.688464829	0	1.725147967	1.466426014	-0.258721953	0.950712289	0.9978586
ENSMUSG00000038831	Ralgps1	Ral GEF with PH domain and SH3 binding motif 1	11.72568229	11.67327771	11.6420931	11.72873966	11.4348113	11.56678268	11.62523575	11.81715704	11.69244819	11.61099669	-0.081451494	0.400453641	0.925901209
ENSMUSG00000014195	Dnajc7	DnaJ heat shock protein family (Hsp40) member C7	11.80592764	11.82588784	11.86999109	11.65825919	11.72764695	11.76050984	11.7964068	11.60707203	11.79001644	11.72290891	-0.067107534	0.380369366	0.914778655
ENSMUSG00000099492	Gm5525	predicted gene 5525	3.541470204	4.772417384	3.973791331	4.83282835	5.788210379	4.607921302	4.392881974	4.381104338	4.280126817	4.792529498	0.512402681	0.210104106	0.7318205
ENSMUSG00000109709	Gm45290	predicted gene 45290	2.068014459	0	2.41333609	2.061062922	0	0	0	0	1.635603368	0	-1.635603368	0.05524253	0.383261658
ENSMUSG00000014198	Zfp385c	zinc finger protein 385C	3.891101417	4.24065392	3.394994784	4.324639127	4.328557257	2.37180711	4.467265589	2.575155827	3.962847312	3.435696446	-0.527150866	0.603764067	0.969741274
ENSMUSG00000098552	Gm27217	predicted gene 27217	0	0	1.449333651	0	2.590779194	2.587621499	0	0	0.362333413	1.294600173	0.93226676	0.263168269	0.80439827
ENSMUSG00000113236	AC154785.2	---	0	0	1.846484642	2.061062922	0	0	0	0	0.976886891	0	-0.976886891	0.324564192	0.868863959
ENSMUSG00000113237	AC154231.1	---	0	0	0.899492338	2.876933903	1.58961773	1.417032207	1.078314528	0	0.94410656	1.021241116	0.077134556	0.740113908	0.973353259
ENSMUSG00000113234	CT030170.2	---	0	0	0	0	1.003492829	0	0	0.994123999	0	0.499404207	0.499404207	0.679875844	0.969741274
ENSMUSG00000001508	Sgca	sarcoglycan, alpha (dystrophin-associated glycoprotein)	2.068014459	2.382061721	0	3.982495002	3.813834889	3.925812223	3.841853679	1.991176999	2.108142795	3.393169447	1.285026652	0.245035005	0.780312553
ENSMUSG00000113231	AC124353.1	---	0	0	0	1.639366891	1.003492829	0	2.115933218	0	0.409841723	0.779856512	0.370014789	0.697436178	0.96988229
ENSMUSG00000001504	Irx2	Iroquois related homeobox 2 (Drosophila)	0	2.64754811	0	0	2.005236078	0	2.445268757	0	0.661887028	1.112626209	0.450739181	0.813725396	0.973353259
ENSMUSG00000001506	Col1a1	collagen, type I, alpha 1	8.284450655	8.308160937	8.327334819	8.209858249	8.151610871	8.280079775	8.281361638	8.591880708	8.282451165	8.326233248	0.043782083	0.679171398	0.969741274
ENSMUSG00000001507	Itga3	integrin alpha 3	9.254746515	9.376164095	9.556584261	9.654400081	9.104996604	9.302774786	9.317250501	9.314671871	9.460473738	9.259923441	-0.200550297	0.065008397	0.419502715
ENSMUSG00000113238	AC154552.2	---	4.545452185	4.772417384	3.892055946	4.600995203	4.530236522	4.793151955	4.049800494	4.743549337	4.45273018	4.529184577	0.076454397	0.812343479	0.973353259
ENSMUSG00000092066	1700121N20Rik	RIKEN cDNA 1700121N20 gene	0	0	0	0	0	0	1.688464829	0	0	0.422116207	0.422116207	0.668370292	0.969741274
ENSMUSG00000019261	Map1s	microtubule-associated protein 1S	11.02584873	11.15356766	11.16004611	11.29938633	11.16495263	11.25249992	11.09869771	11.08691946	11.15971221	11.15076743	-0.008944781	0.900376134	0.989040732
ENSMUSG00000092060	Bend4	BEN domain containing 4	8.123081564	8.27910748	8.488962874	7.894287762	8.151610871	8.35926559	8.281361638	8.122692365	8.19635992	8.228732616	0.032372696	0.904208953	0.990267953
ENSMUSG00000096775	Gm5796	predicted gene 5796	0	2.64754811	3.271140962	0	3.328209112	3.090278098	0	2.312514971	1.479672268	2.182750545	0.703078277	0.656187798	0.969741274
ENSMUSG00000096772	Gm22114	predicted gene, 22114	0	0	0	0	0	0.875920088	0	0	0	0.218980022	0.218980022	0.846512451	0.973353259
ENSMUSG00000101537	Gm29571	predicted gene 29571	0	0	0	1.639366891	0	2.117931851	1.688464829	0	0.409841723	0.95159917	0.541757447	0.562460576	0.965516704
ENSMUSG00000101535	Gm29383	predicted gene 29383	0	0	0	0	2.005236078	0	0	0	0	0.50130902	0.50130902	0.561529182	0.965516704
ENSMUSG00000113588	AC133079.1	---	0	0	0	0	0	1.809634363	0	0	0	0.452408591	0.452408591	0.609425585	0.969741274
ENSMUSG00000029007	Agtrap	angiotensin II, type I receptor-associated protein	7.790011809	7.981370306	7.863751011	8.028904937	8.006950034	7.921046336	8.052856677	8.439468862	7.916009516	8.105080477	0.189070962	0.172112038	0.672767114
ENSMUSG00000038510	Rpf2	ribosome production factor 2 homolog	8.347094295	8.208950345	8.255614641	7.828683161	8.287725612	8.538456997	8.286506782	8.221882926	8.160085611	8.333643079	0.173557469	0.238276696	0.77164947
ENSMUSG00000113581	AL591207.3	---	1.645576219	3.06564474	2.41333609	0	2.005236078	2.941373951	0	4.15880572	1.781139262	2.276353937	0.495214675	0.39061027	0.922175687
ENSMUSG00000113582	AC159813.2	---	0	3.236588011	0	0	0	0	0	0	0.809147003	0	-0.809147003	0.257944462	0.795775295
ENSMUSG00000113585	AL591582.1	---	3.783704699	3.976807249	4.444258039	3.775234473	3.913403719	4.793151955	4.847455465	4.796001121	3.995001115	4.587503065	0.59250195	0.11362088	0.555462548
ENSMUSG00000113586	CT025611.1	---	0	0	0	0	0	0	0	1.991176999	0	0.49779425	0.49779425	0.56486706	0.965516704
ENSMUSG00000113587	CT010478.2	---	0	0	0	1.639366891	2.590779194	1.809634363	0	1.577122502	0.409841723	1.494384015	1.084542292	0.240871026	0.775060802
ENSMUSG00000029004	Kmt2e	lysine (K)-specific methyltransferase 2E	12.3352292	12.03910603	11.94979798	12.11804112	11.48826969	11.95665837	11.56034142	11.75143974	12.11054358	11.6891773	-0.421366279	0.000472054	0.015978752
ENSMUSG00000022055	Nefl	neurofilament, light polypeptide	13.80079151	13.78095017	14.05839909	13.90411838	13.5640813	13.90279868	13.70693285	13.34467706	13.88606479	13.62962248	-0.25644231	0.044202375	0.338119758
ENSMUSG00000010021	Kif19a	kinesin family member 19A	7.043484158	6.732273137	6.23697497	6.571835231	7.858696133	6.970871347	6.216522199	7.22670701	6.646141874	7.068199172	0.422057298	0.083574501	0.478459416
ENSMUSG00000097231	Gm26852	predicted gene, 26852	6.111016585	6.118072882	5.882213448	7.010948757	6.913809814	6.550050587	6.705643439	6.756516767	6.280562918	6.731505152	0.450942234	0.123892785	0.577560356
ENSMUSG00000010025	Aldh3a2	aldehyde dehydrogenase family 3, subfamily A2	10.22177079	10.42456165	10.27542725	10.13606462	10.36781901	10.4047785	10.36922004	10.23259755	10.26445608	10.34360378	0.0791477	0.383443769	0.915367094
ENSMUSG00000097233	Gm17552	predicted gene, 17552	5.921350221	6.28325159	4.96759891	4.662538529	6.561492026	6.68498321	5.822179139	6.117675891	5.458684812	6.296582567	0.837897754	0.033655563	0.290733703
ENSMUSG00000112186	AC165349.2	---	1.04569736	1.635246308	0	1.040994419	1.58961773	1.809634363	0	0	0.930484522	0.849813023	-0.080671498	0.938962006	0.9978586
ENSMUSG00000097232	Gm26854	predicted gene, 26854	0	3.06564474	0	0	2.32751257	0	2.445268757	0	0.766411185	1.193195332	0.426784147	0.92275197	0.997175098
ENSMUSG00000021506	Pitx1	paired-like homeodomain transcription factor 1	0	2.05644782	0	2.386971434	0	0	0	2.312514971	1.110854814	0.578128743	-0.532726071	0.680949944	0.969741274
ENSMUSG00000101281	Gm8449	predicted gene 8449	2.068014459	2.64754811	0	0	1.58961773	0.875920088	2.713220414	0	1.178890642	1.294689558	0.115798916	0.991185655	0.9978586
ENSMUSG00000097237	Gm26519	predicted gene, 26519	2.66033993	3.653659897	0	3.070993449	3.813834889	2.587621499	3.134381001	3.988962792	2.346248319	3.381200045	1.034951726	0.322312398	0.866886734
ENSMUSG00000065952	C330021F23Rik	RIKEN cDNA C330021F23 gene	1.645576219	0	0	2.652653363	2.005236078	1.417032207	1.688464829	1.991176999	1.074557395	1.775477528	0.700920133	0.741507116	0.973353259
ENSMUSG00000065954	Tacc1	transforming, acidic coiled-coil containing protein 1	12.86538366	12.67002911	12.80881226	12.83740105	12.42298173	12.65121018	12.63890288	12.39629046	12.79540652	12.52734631	-0.268060206	0.002744211	0.057251778
ENSMUSG00000108157	Olrf445-ps1	olfactory receptor 445, pseudogene 1	0	0	0	0	0	0	1.078314528	0	0	0.269578632	0.269578632	0.846512451	0.973353259
ENSMUSG00000097429	Gm26520	predicted gene, 26520	3.250190284	0	0	0	0	0	0	0	0.812547571	0	-0.812547571	0.254215146	0.791508726
ENSMUSG00000108154	Gm44033	predicted gene, 44033	2.068014459	4.772417384	3.61474788	2.652653363	1.58961773	3.66590362	2.939114924	2.575155827	3.276958272	2.692448025	-0.584510246	0.259549221	0.798638386
ENSMUSG00000097424	1700030M09Rik	RIKEN cDNA 1700030M09 gene	0	0	0	0	0	1.417032207	0	0	0	0.354258052	0.354258052	0.70871864	0.96988229
ENSMUSG00000010651	Acaa1b	acetyl-Coenzyme A acyltransferase 1B	5.611655722	5.072504157	4.444258039	5.538499508	5.814207847	6.029203605	5.148063665	5.871067413	5.166729357	5.715635632	0.548906276	0.094568899	0.507651834
ENSMUSG00000054966	Lmntd1	lamin tail domain containing 1	4.841644267	3.236588011	4.385735942	3.659250993	3.813834889	3.84427012	3.459970513	5.197996871	4.030804804	4.079018098	0.048213295	0.862857236	0.97718113
ENSMUSG00000054967	Zfp647	zinc finger protein 647	6.959610452	6.448944514	6.638894583	6.308625971	6.561492026	6.49767715	6.593874001	6.558204035	6.58901888	6.552811803	-0.036207077	0.766845504	0.973353259
ENSMUSG00000041308	Sntb2	syntrophin, basic 2	10.65408345	10.65499437	10.4390531	10.58064767	9.458178391	9.994236452	9.796271041	9.817959695	10.58219465	9.766661395	-0.815533251	2.84E-12	2.66E-09
ENSMUSG00000041309	Nkx6-2	NK6 homeobox 2	7.711600483	8.414408454	7.031344673	7.868402803	8.849312402	8.20856541	7.569601332	8.591880708	7.756439103	8.304839963	0.54840086	0.15578176	0.641619842
ENSMUSG00000041303	Gtf3c3	general transcription factor IIIC, polypeptide 3	9.972542215	9.921761616	10.04548603	9.89615211	9.729776517	9.887611779	9.683781634	9.52739867	9.958985492	9.70714215	-0.251843342	0.010765532	0.141941456
ENSMUSG00000041301	Cftr	cystic fibrosis transmembrane conductance regulator	5.087262684	5.072504157	3.973791331	4.246406016	5.176708868	5.300789739	3.949570471	3.311334	4.594991047	4.434600769	-0.160390278	0.989487548	0.9978586
ENSMUSG00000000365	Rnf17	ring finger protein 17	3.541470204	4.595173254	2.41333609	4.324639127	4.328557257	5.139236278	4.14351718	4.573679059	3.718654669	4.546247444	0.827592775	0.148965955	0.628677052
ENSMUSG00000078880	Gm14308	predicted gene 14308	7.565234809	7.431890958	7.472028974	7.356473101	7.18683831	7.561594018	7.569601332	7.27370198	7.45640696	7.39793391	-0.058473051	0.741349489	0.973353259
ENSMUSG00000093085	Gm24325	predicted gene, 24325	1.645576219	1.037876205	1.846484642	2.061062922	1.003492829	2.117931851	1.078314528	1.577122502	1.647749997	1.444215428	-0.203534569	0.831697551	0.973353259
ENSMUSG00000093331	Gm22120	predicted gene, 22120	1.04569736	0	0	0	0	0	0	0	0.26142434	0	-0.26142434	0.830018289	0.973353259
ENSMUSG00000086234	Usp46os2	ubiquitin specific peptidase 46, opposite strand 2	0	0	0	0	0	0	2.445268757	0	0	0.611317189	0.611317189	0.456371897	0.956861716
ENSMUSG00000102782	Gm37625	predicted gene, 37625	1.04569736	1.037876205	0	0	2.005236078	1.809634363	0	0	0.520893391	0.95371761	0.432824219	0.518262665	0.965516704
ENSMUSG00000118138	---	---	5.788752591	5.282265739	5.944358618	6.07962694	5.621545012	5.526682889	5.277735714	5.032976351	5.773750972	5.364734991	-0.409015981	0.118735916	0.567033281
ENSMUSG00000115329	---	---	2.068014459	0	0	3.070993449	0	1.417032207	2.939114924	1.991176999	1.284751977	1.586831032	0.302079055	0.947107731	0.9978586
ENSMUSG00000118134	---	---	0	2.05644782	2.630511888	2.652653363	3.328209112	2.117931851	0	1.577122502	1.834903268	1.755815866	-0.079087402	0.949038385	0.9978586
ENSMUSG00000118136	---	---	0	0	0	0	0	2.117931851	0	0	0	0.529482963	0.529482963	0.52690629	0.965516704
ENSMUSG00000118132	---	---	4.894227342	3.976807249	4.124558065	2.061062922	5.094235333	4.276043866	3.30634127	3.988962792	3.764163894	4.166395815	0.402231921	0.654594722	0.969741274
ENSMUSG00000022015	Tnfsf11	tumor necrosis factor (ligand) superfamily, member 11	2.66033993	2.05644782	0	0	0	1.809634363	0	0	1.179196938	0.452408591	-0.726788347	0.439772351	0.94899496
ENSMUSG00000022014	Epsti1	epithelial stromal interaction 1 (breast)	5.131739574	3.06564474	3.80541029	4.324639127	4.466092426	4.076249871	3.134381001	5.543064376	4.081858432	4.304946919	0.223088486	0.591461881	0.969741274
ENSMUSG00000022016	Akap11	A kinase (PRKA) anchor protein 11	12.45054778	12.27198458	12.39997658	12.24007955	12.25668185	12.47130453	12.34115369	12.30592153	12.34064712	12.3437654	0.003118281	0.972575234	0.9978586
ENSMUSG00000022010	Tsc22d1	TSC22 domain family, member 1	13.10644116	13.38808446	13.38065597	13.36870487	13.23759743	12.79377584	13.16834187	12.98399257	13.31097161	13.04592693	-0.265044688	0.020772567	0.214374506
ENSMUSG00000022013	Dnajc15	DnaJ heat shock protein family (Hsp40) member C15	10.74814908	10.54029826	10.65653501	10.60632355	10.47763119	10.58266121	10.63631052	10.47406152	10.63782648	10.54266611	-0.095160365	0.233824958	0.765770624
ENSMUSG00000022012	Enox1	ecto-NOX disulfide-thiol exchanger 1	9.80413324	9.700399991	9.971557295	9.302311492	10.08378638	9.773850455	9.716554059	9.533204228	9.694600505	9.776848779	0.082248275	0.619011086	0.969741274
ENSMUSG00000022019	Tdrd3	tudor domain containing 3	9.395915446	8.897989753	9.175494933	8.993582279	8.839851973	8.964633512	8.752135457	8.971240909	9.115745603	8.881965463	-0.23378014	0.054017721	0.378539115
ENSMUSG00000022018	Rgcc	regulator of cell cycle	8.779778302	8.91697496	8.425015048	8.865312619	9.089113422	8.706509406	8.969258383	9.016152615	8.746770232	8.945258457	0.198488224	0.151601322	0.633441988
ENSMUSG00000055612	Cdca7	cell division cycle associated 7	6.761561358	6.828995947	6.134072159	6.269603094	8.191828647	5.675553066	6.809372944	7.503988417	6.498558139	7.045185769	0.546627629	0.135834907	0.602631754
ENSMUSG00000020528	Prpsap2	phosphoribosyl pyrophosphate synthetase-associated protein 2	9.284599555	9.40558711	9.330915149	9.157526063	9.702197118	9.620041267	9.51212501	9.586291724	9.294656969	9.60516378	0.31050681	0.000813199	0.024281865
ENSMUSG00000020527	Myo19	myosin XIX	9.69350579	9.621580427	9.595836769	9.913659881	9.05681264	8.908069021	9.307159913	9.588152046	9.706145717	9.215048405	-0.491097312	0.001105044	0.03007077
ENSMUSG00000020526	Znhit3	zinc finger, HIT type 3	8.617232144	8.700307731	8.852570836	8.68428028	8.196777945	8.557770586	8.316998165	8.692155895	8.713597748	8.440925648	-0.2726721	0.046528971	0.34717269
ENSMUSG00000020525	Ppm1d	protein phosphatase 1D magnesium-dependent, delta isoform	9.349592523	9.028832772	9.093306527	8.815381115	8.748427947	9.089320572	8.774280119	8.709351175	9.071778234	8.830344953	-0.241433281	0.074536151	0.450794613
ENSMUSG00000020524	Gria1	glutamate receptor, ionotropic, AMPA1 (alpha 1)	13.35574426	13.28955018	13.48015921	13.08980033	13.63359833	13.51619782	13.56077958	13.53825021	13.3038135	13.56220648	0.258392987	0.006620204	0.103282947
ENSMUSG00000020523	Fam114a2	family with sequence similarity 114, member A2	9.591708432	9.69307618	9.723899182	9.742537106	9.801385251	9.592212946	9.664150147	9.567555361	9.687805225	9.656325926	-0.031479299	0.73195262	0.973353259
ENSMUSG00000020522	Mfap3	microfibrillar-associated protein 3	10.26733578	10.08733739	10.26430352	10.28658276	9.948017749	10.15927049	10.00106175	9.902621352	10.22638986	10.00274283	-0.223647028	0.014099229	0.168620229
ENSMUSG00000020521	Rnft1	ring finger protein, transmembrane 1	9.74272818	9.214205531	9.395369506	9.600385209	9.226134065	9.158424509	9.294446613	9.285158972	9.488172107	9.24104104	-0.247131067	0.031586994	0.279295529
ENSMUSG00000020520	Galnt10	UDP-N-acetyl-alpha-D-galactosamine:polypeptide N-acetylgalactosaminyltransferase 10	8.490612886	8.440884756	8.263761903	8.511080703	8.66159598	8.60185487	8.714455163	8.861693291	8.426585062	8.709899826	0.283314764	0.011516693	0.147694992
ENSMUSG00000091867	Cyp2a22	cytochrome P450, family 2, subfamily a, polypeptide 22	0	0	0	0	0	0	0	0.994123999	0	0.248531	0.248531	0.846512451	0.973353259
ENSMUSG00000091864	Gm17102	predicted gene 17102	4.671314403	3.769606182	3.80541029	3.070993449	3.591359576	5.698936999	3.134381001	3.448730115	3.829331081	3.968351922	0.139020841	0.439913037	0.949041914
ENSMUSG00000094817	Cphx3	cytoplasmic polyadenylated homeobox 3	0	0	0	1.040994419	0	0	0	0	0.260248605	0	-0.260248605	0.830018289	0.973353259
ENSMUSG00000094819	Olfr53	olfactory receptor 53	0	1.037876205	0	0	0	1.417032207	0	0	0.259469051	0.354258052	0.094789001	0.865602303	0.977320391
ENSMUSG00000109282	Gm45188	predicted gene 45188	2.884829173	2.64754811	3.135647341	2.876933903	0	2.37180711	0	2.797267076	2.886239632	1.292268546	-1.593971085	0.168226872	0.665874241
ENSMUSG00000109284	B230311B06Rik	RIKEN cDNA B230311B06 gene	1.645576219	4.530898564	3.271140962	4.398847215	3.176128642	4.33693292	4.231515646	3.159462173	3.46161574	3.726009845	0.264394105	0.992028201	0.997885247
ENSMUSG00000109286	Gm44541	predicted gene 44541	2.66033993	0	0	0	0	0	0	0	0.665084982	0	-0.665084982	0.403152467	0.925901209
ENSMUSG00000059263	Usp47	ubiquitin specific peptidase 47	11.21987959	11.32268095	11.42224771	11.27803929	11.00061987	11.21851963	11.07510567	11.011984	11.31071189	11.07655729	-0.234154595	0.004252987	0.076584302
ENSMUSG00000028759	Hp1bp3	heterochromatin protein 1, binding protein 3	12.69684544	12.723579	12.79868456	12.65945179	12.80443513	12.80863136	12.69922501	12.63860444	12.7196402	12.73772399	0.018083789	0.79090287	0.973353259
ENSMUSG00000052062	Pard3b	par-3 family cell polarity regulator beta	6.803405985	6.139784447	7.210618827	6.808034541	6.788273659	6.661370141	6.865461649	7.363334627	6.74046095	6.919610019	0.179149069	0.531304527	0.965516704
ENSMUSG00000013646	Sh3bp5l	SH3 binding domain protein 5 like	10.19320008	10.60025477	10.68866158	10.73812585	10.46947456	9.698994637	10.38848998	9.52739867	10.55506057	10.02108946	-0.533971104	0.011039323	0.144356905
ENSMUSG00000118282	---	---	2.068014459	3.06564474	2.41333609	2.061062922	3.328209112	1.809634363	2.445268757	0	2.402014552	1.895778058	-0.506236494	0.843916287	0.973353259
ENSMUSG00000118283	---	---	2.068014459	2.382061721	0	2.061062922	1.58961773	1.417032207	3.134381001	1.991176999	1.627784776	2.033051984	0.405267209	0.671664442	0.969741274
ENSMUSG00000028756	Pink1	PTEN induced putative kinase 1	13.42746569	13.68545642	13.61782011	13.87364084	13.39472467	13.51578639	13.21513108	13.39003789	13.65109576	13.37892001	-0.272175756	0.010544624	0.140301952
ENSMUSG00000057615	Ldoc1	leucine zipper, down-regulated in cancer 1	3.079044871	4.530898564	4.385735942	3.659250993	5.176708868	3.348651568	3.598803161	4.796001121	3.913732593	4.230041179	0.316308587	0.429263812	0.939615061
ENSMUSG00000057614	Gnai1	guanine nucleotide binding protein (G protein), alpha inhibiting 1	12.30914181	12.4920952	12.5718214	12.42790865	12.42588268	12.57367792	12.61097675	12.38108021	12.45024176	12.49790439	0.047662625	0.585132144	0.969741274
ENSMUSG00000028718	Stil	Scl/Tal1 interrupting locus	3.667665513	4.930249163	3.61474788	5.078396742	5.433080099	3.757841642	4.902110306	5.346064338	4.322764825	4.859774096	0.537009272	0.262571788	0.803575403
ENSMUSG00000028719	Cmpk1	cytidine monophosphate (UMP-CMP) kinase 1	10.63102965	10.96272708	11.13528204	10.6305883	10.84853778	10.8663423	10.92069716	10.72716757	10.83990677	10.8406862	0.000779436	0.902085378	0.989435958
ENSMUSG00000118281	---	---	0	0	0	0	0	1.417032207	0	0	0	0.354258052	0.354258052	0.70871864	0.96988229
ENSMUSG00000028710	Atpaf1	ATP synthase mitochondrial F1 complex assembly factor 1	10.44527608	10.4056437	10.51097669	10.58064767	10.47559635	10.56686106	10.36070782	10.05835591	10.48563603	10.36538029	-0.120255749	0.328293081	0.872314589
ENSMUSG00000028712	Cyp4a31	cytochrome P450, family 4, subfamily a, polypeptide 31	0	0	0	0	1.58961773	0	0	0	0	0.397404432	0.397404432	0.678492791	0.969741274
ENSMUSG00000028713	Cyp4b1	cytochrome P450, family 4, subfamily b, polypeptide 1	3.079044871	3.389405204	4.324739194	3.775234473	3.706881428	4.076249871	4.14351718	3.311334	3.642105935	3.80949562	0.167389684	0.801089475	0.973353259
ENSMUSG00000028715	Cyp4a14	cytochrome P450, family 4, subfamily a, polypeptide 14	5.373155087	5.201982679	1.846484642	0	0	2.37180711	0	3.689572954	3.105405602	1.515345016	-1.590060586	0.256758332	0.794422231
ENSMUSG00000028716	Pdzk1ip1	PDZK1 interacting protein 1	0	0	0	2.386971434	2.32751257	1.417032207	2.939114924	1.991176999	0.596742858	2.168709175	1.571966316	0.180630598	0.685254181
ENSMUSG00000025583	Rptor	regulatory associated protein of MTOR, complex 1	11.47636042	11.66253724	11.85591314	11.72288318	11.49179769	11.63201443	11.63988304	11.58906989	11.6794235	11.58819126	-0.091232232	0.28905875	0.838510864
ENSMUSG00000118284	---	---	2.884829173	2.64754811	3.61474788	0	3.328209112	0	0	1.991176999	2.286781291	1.329846528	-0.956934763	0.454647388	0.956861716
ENSMUSG00000102162	Gm2367	predicted gene 2367	3.079044871	3.653659897	4.1944172	4.246406016	3.328209112	3.757841642	3.459970513	3.988962792	3.793381996	3.633746015	-0.159635981	0.637492078	0.969741274
ENSMUSG00000039176	Polg	polymerase (DNA directed), gamma	10.95025571	11.16618539	11.37131542	11.45912141	11.18874767	11.20888031	11.07659152	11.19035281	11.23671948	11.16614308	-0.070576405	0.449476458	0.955408935
ENSMUSG00000087993	Mir1982	microRNA 1982	1.04569736	1.037876205	0.899492338	1.040994419	1.003492829	0.875920088	1.078314528	0.994123999	1.00601508	0.987962861	-0.018052219	0.981393144	0.9978586
ENSMUSG00000052392	Acot4	acyl-CoA thioesterase 4	6.959610452	6.359250981	7.227379384	6.925662221	7.062207324	5.418153019	7.070261889	6.858689744	6.86797576	6.602327994	-0.265647765	0.586702312	0.969741274
ENSMUSG00000117248	---	---	0	1.635246308	0	1.040994419	0	0.875920088	0	1.991176999	0.669060182	0.716774272	0.04771409	0.897621275	0.988036188
ENSMUSG00000108115	Gm7039	predicted gene 7039	2.66033993	1.635246308	1.449333651	0	0	0.875920088	0	0	1.436229972	0.218980022	-1.21724995	0.134370017	0.599621268
ENSMUSG00000039178	Tbc1d19	TBC1 domain family, member 19	9.721058622	9.373875735	9.357804807	9.290176624	9.306174193	9.570191379	9.761589186	9.669476781	9.435728947	9.576857885	0.141128937	0.276677049	0.823529599
ENSMUSG00000039179	Tekt5	tektin 5	6.531931948	7.293462723	7.159136195	6.249688565	8.549990383	8.085327492	7.933297235	7.345848068	6.808554858	7.978615795	1.170060937	1.23E-05	0.000994966
ENSMUSG00000092889	Gm22121	predicted gene, 22121	1.645576219	1.037876205	0.899492338	1.040994419	1.003492829	0.875920088	0	1.991176999	1.155984795	0.967647479	-0.188337316	0.965296997	0.9978586
ENSMUSG00000110210	Gm33756	predicted gene, 33756	0	0	0	2.061062922	2.32751257	1.809634363	2.115933218	2.797267076	0.51526573	2.262586807	1.747321076	0.091049739	0.498982745
ENSMUSG00000092885	Gm22123	predicted gene, 22123	1.04569736	1.037876205	0.899492338	1.040994419	1.003492829	0.875920088	1.078314528	0.994123999	1.00601508	0.987962861	-0.018052219	0.981393144	0.9978586
ENSMUSG00000117245	---	---	0	0	0	0	0	0	0	1.991176999	0	0.49779425	0.49779425	0.56486706	0.965516704
ENSMUSG00000092887	Snord53	small nucleolar RNA, C/D box 53	1.645576219	2.382061721	1.846484642	1.040994419	2.005236078	0.875920088	2.115933218	2.312514971	1.72877925	1.827401089	0.098621839	0.89379438	0.986655778
ENSMUSG00000116898	---	---	3.403168963	3.976807249	4.798449417	3.070993449	3.813834889	3.348651568	2.115933218	3.574171483	3.81235477	3.21314779	-0.59920698	0.237703913	0.771217281
ENSMUSG00000025094	Slc18a2	solute carrier family 18 (vesicular monoamine), member 2	6.857375301	7.405247549	6.81554751	7.464089454	6.761800276	6.696646378	7.51804022	7.406145627	7.135564953	7.095658125	-0.039906828	0.913950458	0.994763903
ENSMUSG00000025090	Ccdc172	coiled-coil domain containing 172	0	0	2.41333609	2.876933903	0	0	0	0	1.322567498	0	-1.322567498	0.10435346	0.532868733
ENSMUSG00000025091	Pnliprp2	pancreatic lipase-related protein 2	0	0	0	1.040994419	0	1.417032207	0	0	0.260248605	0.354258052	0.094009447	0.865602303	0.977320391
ENSMUSG00000025092	Hspa12a	heat shock protein 12A	12.75420319	12.7429924	12.88175838	12.72266976	12.68381477	12.86414741	12.5656683	12.47732134	12.77540593	12.64773795	-0.127667978	0.201227909	0.716714446
ENSMUSG00000117241	---	---	0	1.635246308	2.986096998	1.639366891	0	1.809634363	1.688464829	1.577122502	1.565177549	1.268805423	-0.296372126	0.568640805	0.968105738
ENSMUSG00000111511	AC160966.2	---	0	0	1.449333651	0	2.590779194	0	0	0	0.362333413	0.647694799	0.285361386	0.643196429	0.969741274
ENSMUSG00000114746	AC121942.3	---	2.66033993	0	1.846484642	0	2.590779194	0	2.115933218	3.311334	1.126706143	2.004511603	0.87780546	0.404287695	0.925901209
ENSMUSG00000111512	AC112680.1	---	4.545452185	3.06564474	3.973791331	3.533121572	4.466092426	4.002991028	3.134381001	4.573679059	3.779502457	4.044285879	0.264783422	0.572340772	0.969741274
ENSMUSG00000111515	AC132474.4	---	0	0	0	0	1.58961773	0	0	0.994123999	0	0.645935432	0.645935432	0.562637579	0.965516704
ENSMUSG00000111514	AC150314.3	---	2.66033993	2.8716894	1.846484642	2.386971434	2.590779194	0	2.939114924	2.797267076	2.441371351	2.081790298	-0.359581053	0.927529657	0.9978586
ENSMUSG00000050677	Ccdc96	coiled-coil domain containing 96	5.673135393	5.201982679	5.496202907	5.664179491	5.864838207	5.446060447	5.47089934	5.573432784	5.508875118	5.588807694	0.079932577	0.758040065	0.973353259
ENSMUSG00000021737	Psmd6	proteasome (prosome, macropain) 26S subunit, non-ATPase, 6	10.24093139	10.35781326	10.32201283	10.20102332	10.2807672	10.3337312	10.31863292	10.19890529	10.2804452	10.28300915	0.002563951	0.979263102	0.9978586
ENSMUSG00000021731	Mrps30	mitochondrial ribosomal protein S30	9.023503821	9.229473648	9.374830064	9.217707528	9.023772074	9.210199138	9.034932097	8.921938802	9.211378765	9.047710528	-0.163668237	0.13414644	0.599089261
ENSMUSG00000021730	Hcn1	hyperpolarization-activated, cyclic nucleotide-gated K+ 1	11.5041163	11.45305088	11.82768183	11.19716463	10.922853	11.41531779	11.31240391	11.15062045	11.49550341	11.20029879	-0.295204619	0.029509309	0.268664327
ENSMUSG00000021733	Slc4a7	solute carrier family 4, sodium bicarbonate cotransporter, member 7	7.909784469	8.177806174	9.37294826	7.999394363	7.925811698	9.439203047	9.648250321	9.37194596	8.364983317	9.096302757	0.73131944	0.143005169	0.617383986
ENSMUSG00000021732	Fgf10	fibroblast growth factor 10	7.666963576	7.795537154	8.28393101	7.022731167	7.576796197	7.712833235	8.07681235	7.736471812	7.692290727	7.775728399	0.083437672	0.915991068	0.995482655
ENSMUSG00000021738	Atxn7	ataxin 7	9.553392382	9.201357496	9.669744127	9.847294716	9.721214454	9.639810827	9.322269452	9.660663799	9.56794718	9.585989633	0.018042453	0.956567198	0.9978586
ENSMUSG00000035873	Pawr	PRKC, apoptosis, WT1, regulator	6.176170881	6.658986554	6.880566483	6.327748599	6.216336526	5.873500455	6.508380901	6.542938602	6.510868129	6.285289121	-0.225579008	0.313869884	0.859367232
ENSMUSG00000106269	4930580E04Rik	RIKEN cDNA 4930580E04 gene	2.068014459	2.64754811	2.819232083	0	2.005236078	2.941373951	2.939114924	2.312514971	1.883698663	2.549559981	0.665861318	0.592318732	0.969741274
ENSMUSG00000035877	Zhx3	zinc fingers and homeoboxes 3	11.12406113	11.15822914	11.1213383	11.41006127	10.86806039	10.92701123	10.67507896	10.74144757	11.20342246	10.80289954	-0.400522925	2.80E-05	0.001932483
ENSMUSG00000035875	AI182371	expressed sequence AI182371	3.079044871	3.876923321	3.892055946	2.061062922	2.590779194	0	3.30634127	4.895508649	3.227271765	2.698157278	-0.529114487	0.863546103	0.977320391
ENSMUSG00000106262	Gm43375	predicted gene 43375	3.891101417	4.656706109	3.892055946	4.778268323	4.254538354	4.505549955	4.392881974	5.117844779	4.304532949	4.567703765	0.263170817	0.509848981	0.965516704
ENSMUSG00000106261	Gm34086	predicted gene, 34086	1.645576219	2.05644782	0	2.652653363	0	0	0	1.577122502	1.588669351	0.394280625	-1.194388725	0.198825128	0.714210157
ENSMUSG00000035878	Hykk	hydroxylysine kinase 1	7.055077764	6.359250981	6.663735945	6.780539531	7.073014469	6.625209677	6.89270892	6.870967218	6.714651055	6.865475071	0.150824016	0.48747249	0.965516704
ENSMUSG00000106267	Gm40319	predicted gene, 40319	1.04569736	0	0	0	0	0	0	0	0.26142434	0	-0.26142434	0.830018289	0.973353259
ENSMUSG00000106265	Gm42490	predicted gene 42490	0	2.05644782	0	0	0	0	0	0	0.514111955	0	-0.514111955	0.541846636	0.965516704
ENSMUSG00000106264	Mir7646	microRNA 7646	1.04569736	1.037876205	0.899492338	1.040994419	1.003492829	0.875920088	1.078314528	0.994123999	1.00601508	0.987962861	-0.018052219	0.981393144	0.9978586
ENSMUSG00000112960	AC154552.1	---	0	1.635246308	0.899492338	2.652653363	2.590779194	2.117931851	2.445268757	1.577122502	1.296848002	2.182775576	0.885927574	0.433310624	0.941966039
ENSMUSG00000112964	CT009718.1	---	7.733411499	6.993044213	7.339548603	7.30915047	7.474543448	6.550050587	7.291119882	7.282920027	7.343788696	7.149658486	-0.19413021	0.412288373	0.931382249
ENSMUSG00000112967	AC166996.1	---	0	0	1.846484642	0	0	0	0	0	0.46162116	0	-0.46162116	0.592102664	0.969741274
ENSMUSG00000008090	Fgfrl1	fibroblast growth factor receptor-like 1	8.187705232	8.129791833	8.025819699	8.319000433	8.52659451	8.29166163	8.531539325	8.833739722	8.165579299	8.545883797	0.380304498	0.005132705	0.087332588
ENSMUSG00000112969	AC156560.1	---	0	1.037876205	1.449333651	1.040994419	2.32751257	1.417032207	1.078314528	0	0.882051069	1.205714826	0.323663757	0.617775179	0.969741274
ENSMUSG00000112968	AC122379.1	---	2.884829173	3.389405204	2.986096998	0	0	2.775313294	2.445268757	3.159462173	2.315082844	2.095011056	-0.220071788	0.747535309	0.973353259
ENSMUSG00000116896	---	---	0	0	0	0	0	1.417032207	0	0	0	0.354258052	0.354258052	0.70871864	0.96988229
ENSMUSG00000022586	Ly6i	lymphocyte antigen 6 complex, locus I	0	0	0	0	0	0	0	1.991176999	0	0.49779425	0.49779425	0.56486706	0.965516704
ENSMUSG00000086725	A630052C17Rik	RIKEN cDNA A630052C17 gene	6.971895105	6.89431728	7.167845228	7.270141971	7.136210522	6.861143733	7.535432815	7.595614916	7.076049896	7.282100497	0.206050601	0.253929473	0.791435528
ENSMUSG00000052934	Fbxo31	F-box protein 31	12.19522557	12.42598478	12.45993109	12.6318302	12.14812488	12.37251431	12.15678108	12.06637751	12.42824291	12.18594945	-0.242293461	0.020224373	0.21124411
ENSMUSG00000086728	Man2c1os	mannosidase, alpha, class 2C, member 1, opposite strand	4.787071922	4.715721513	5.628275788	5.570960747	5.433080099	5.069184272	6.417500623	6.096919779	5.175507493	5.754171193	0.578663701	0.087310358	0.488441629
ENSMUSG00000117218	---	---	0	0	0	0	0	0	0	2.575155827	0	0.643788957	0.643788957	0.425793562	0.93752711
ENSMUSG00000117219	---	---	4.084528611	4.070221307	3.394994784	4.662538529	4.094030572	2.587621499	4.14351718	4.076382183	4.053070808	3.725387858	-0.327682949	0.552522786	0.965516704
ENSMUSG00000117216	---	---	1.04569736	1.037876205	1.449333651	1.639366891	1.003492829	0.875920088	1.078314528	0	1.293068527	0.739431861	-0.553636665	0.523247588	0.965516704
ENSMUSG00000110325	Gm45293	predicted gene 45293	0	2.05644782	0	0	0	1.809634363	0	0	0.514111955	0.452408591	-0.061703364	0.927232483	0.9978586
ENSMUSG00000022837	Iqcb1	IQ calmodulin-binding motif containing 1	9.011652631	9.196186072	9.173334096	9.089132019	9.06766012	9.206124861	9.177457469	9.040814285	9.117576204	9.123014184	0.00543798	0.95692041	0.9978586
ENSMUSG00000022836	Mylk	myosin, light polypeptide kinase	9.405004184	8.98752153	8.100501448	9.184000923	9.228552685	9.3404355	9.324772395	9.269013747	8.919257021	9.290693582	0.371436561	0.144859733	0.621244482
ENSMUSG00000022833	Ccdc14	coiled-coil domain containing 14	5.895787768	6.118072882	6.451886068	5.505291031	6.707350013	6.047536045	6.150331545	7.065127148	5.992759437	6.492586188	0.499826751	0.070137724	0.437521235
ENSMUSG00000022832	Ropn1	ropporin, rhophilin associated protein 1	1.645576219	0	0	0	0	0	2.115933218	0	0.411394055	0.528983305	0.11758925	0.842512664	0.973353259
ENSMUSG00000022831	Hcls1	hematopoietic cell specific Lyn substrate 1	6.628212003	6.993044213	6.626311638	7.157089108	7.672278852	7.280844529	7.473618659	7.345848068	6.851164241	7.443147527	0.591983287	0.001226253	0.032295386
ENSMUSG00000022838	Eaf2	ELL associated factor 2	3.403168963	3.769606182	4.385735942	4.324639127	4.398963161	4.076249871	4.31445375	3.574171483	3.970787553	4.090959567	0.120172013	0.829723372	0.973353259
ENSMUSG00000039824	Myl6b	myosin, light polypeptide 6B	8.002518876	8.496635679	8.640564359	8.304594755	8.110239721	8.391915568	8.491998878	8.27828059	8.361078417	8.318108689	-0.042969728	0.707921973	0.96988229
ENSMUSG00000039826	Trub2	TruB pseudouridine (psi) synthase family member 2	8.903578893	9.156797975	9.181958096	9.222823967	9.261994401	9.048943842	9.146665348	8.985426587	9.116289733	9.110757544	-0.005532188	0.940925239	0.9978586
ENSMUSG00000086098	Gm14291	predicted gene 14291	6.065886046	6.182251265	6.285798755	6.269603094	5.650694198	5.526682889	5.734538482	5.414763677	6.20088479	5.581669812	-0.619214978	0.004090005	0.074861479
ENSMUSG00000086096	Gm12688	predicted gene 12688	0	0	0	0	0	0	4.231515646	0	0	1.057878912	1.057878912	0.065398853	0.420618859
ENSMUSG00000086095	Gm15328	predicted gene 15328	6.065886046	5.160101171	5.628275788	5.986435555	6.196706431	6.118621465	5.673006494	6.414626206	5.71017464	6.100740149	0.390565509	0.154363587	0.638745879
ENSMUSG00000039828	Wdr70	WD repeat domain 70	9.335400558	9.416745772	9.342500711	8.978536688	9.11548907	9.389766502	9.299545385	8.814798498	9.268295932	9.154899864	-0.113396069	0.454109915	0.956861716
ENSMUSG00000086090	Gm12531	predicted gene 12531	0	0	0	0	0	0	1.078314528	0	0	0.269578632	0.269578632	0.846512451	0.973353259
ENSMUSG00000027722	Spata5	spermatogenesis associated 5	7.651772337	8.156663494	8.063643761	7.787838942	8.099708868	7.911069061	7.619383089	7.667761744	7.914979634	7.82448069	-0.090498943	0.576475712	0.969741274
ENSMUSG00000068487	Gm4943	predicted pseudogene 4943	0	0	1.449333651	0	0	1.417032207	0	0	0.362333413	0.354258052	-0.008075361	0.990415108	0.9978586
ENSMUSG00000084688	n-R5s43	nuclear encoded rRNA 5S 43	1.04569736	0	1.449333651	0	0	0	0	0	0.623757753	0	-0.623757753	0.573388925	0.969741274
ENSMUSG00000070348	Ccnd1	cyclin D1	10.75527378	10.71407842	10.96147718	10.51855147	10.74083586	10.80637778	10.87531771	10.68432926	10.73734521	10.77671515	0.039369944	0.754239672	0.973353259
ENSMUSG00000020069	Hnrnph3	heterogeneous nuclear ribonucleoprotein H3	10.32473662	10.00692356	9.936311232	10.04511824	10.38309737	10.06568316	10.26490456	10.33030774	10.07827241	10.26099821	0.182725797	0.102461917	0.528963995
ENSMUSG00000070342	Gm10287	predicted gene 10287	3.250190284	0	0	2.061062922	0	1.809634363	0	2.575155827	1.327813301	1.096197547	-0.231615754	0.707292677	0.96988229
ENSMUSG00000020063	Sirt1	sirtuin 1	9.267260439	9.051918718	9.115985332	9.089132019	9.097076871	9.14571714	9.180224436	8.962662064	9.131074127	9.096420128	-0.034653999	0.724344691	0.973353259
ENSMUSG00000020061	Mybpc1	myosin binding protein C, slow-type	7.884014416	7.696465233	7.895558268	8.124952329	6.328818311	6.49767715	7.291119882	6.88314109	7.900247561	6.750189108	-1.150058453	5.87E-08	1.38E-05
ENSMUSG00000063632	Sox11	SRY (sex determining region Y)-box 11	9.342513992	9.464843742	8.9816635	8.92303511	9.91235697	8.935398438	9.252994424	9.472056258	9.178014086	9.393201523	0.215187437	0.204439297	0.722589122
ENSMUSG00000020067	Mypn	myopalladin	6.317646577	6.643871666	6.922339575	7.38413908	6.49875298	7.018115912	6.879149609	6.27377777	6.816999224	6.667449068	-0.149550157	0.495854948	0.965516704
ENSMUSG00000020064	Herc4	hect domain and RLD 4	9.879426649	9.958876799	10.04312126	9.926260667	10.03625779	10.02347264	10.06383748	9.936603166	9.951921343	10.01504277	0.063121427	0.430869835	0.940079641
ENSMUSG00000070345	Hsf5	heat shock transcription factor family member 5	4.407550957	5.201982679	4.124558065	4.246406016	3.913403719	4.33693292	3.725440712	4.381104338	4.495124429	4.089220422	-0.405904007	0.269185829	0.812939696
ENSMUSG00000009075	Cabp7	calcium binding protein 7	8.972449789	9.515547704	9.072586246	9.06938598	9.06766012	8.976642083	9.196715712	9.753109148	9.157492429	9.248531766	0.091039336	0.538614568	0.965516704
ENSMUSG00000052942	Glis3	GLIS family zinc finger 3	7.259310611	7.129517776	6.837547697	7.188810635	7.943586752	6.989955227	7.195892577	7.864791228	7.10379668	7.498556446	0.394759766	0.04794704	0.352480314
ENSMUSG00000097063	Pantr2	POU domain, class 3, transcription factor 3 adjacent noncoding transcript 2	6.37427488	5.358315736	5.628275788	6.269603094	5.621545012	5.578032191	5.47089934	6.380682147	5.907617375	5.762789672	-0.144827702	0.612813364	0.969741274
ENSMUSG00000090907	C030017D09Rik	RIKEN cDNA C030017D09 gene	0	0	1.449333651	2.061062922	2.005236078	2.941373951	2.115933218	2.312514971	0.877599143	2.343764554	1.466165411	0.126742263	0.582707515
ENSMUSG00000030960	Eef1akmt2	EEF1A lysine methyltransferase 2	7.711600483	8.051774097	8.222557552	8.124952329	8.186862312	8.116052556	8.009952576	7.833765426	8.027721115	8.036658217	0.008937102	0.992147831	0.997885247
ENSMUSG00000030966	Trim21	tripartite motif-containing 21	5.579904661	5.828320675	5.222928075	6.10201367	6.115400801	4.749025824	5.541461475	6.217200305	5.68329177	5.655772101	-0.027519669	0.897072308	0.988036188
ENSMUSG00000030967	Zranb1	zinc finger, RAN-binding domain containing 1	10.7685385	10.61292332	10.69620645	10.68906054	10.49782326	10.55889562	10.66326078	10.59371107	10.6916822	10.57842269	-0.113259517	0.125204172	0.579459432
ENSMUSG00000030965	Abraxas2	BRISC complex subunit	9.894025018	9.755933043	9.812650667	9.735394555	9.532488588	9.730539696	9.759740524	9.586291724	9.799500821	9.652265133	-0.147235688	0.105267722	0.534884701
ENSMUSG00000082394	Gm4596	predicted gene 4596	2.394364844	0	1.846484642	2.061062922	3.006106913	2.587621499	0	2.312514971	1.575478102	1.976560846	0.401082744	0.535886567	0.965516704
ENSMUSG00000070699	Sars2	seryl-aminoacyl-tRNA synthetase 2	8.4206375	8.264358356	8.618497408	8.446940004	8.710864105	8.322099576	8.656022643	8.40188657	8.437608317	8.522718224	0.085109907	0.518093727	0.965516704
ENSMUSG00000048304	Slitrk3	SLIT and NTRK-like family, member 3	11.18929963	10.81620782	11.0769469	10.89058041	11.2877452	11.08511595	10.9428626	10.96908342	10.99325869	11.07120179	0.0779431	0.484769933	0.964704256
ENSMUSG00000048307	Ankrd46	ankyrin repeat domain 46	12.09979905	12.34389532	12.39650726	12.29819148	12.13238914	12.32891666	12.23570936	11.96800932	12.28459828	12.16625612	-0.118342155	0.241642293	0.775546942
ENSMUSG00000070697	Utp3	UTP3 small subunit processome component	9.67107827	9.244581873	9.437393314	9.072223443	9.322115858	9.396933431	9.352021927	9.25736981	9.356319225	9.332110256	-0.024208969	0.749594522	0.973353259
ENSMUSG00000070690	5830473C10Rik	RIKEN cDNA 5830473C10 gene	0	2.05644782	0	2.652653363	3.006106913	1.417032207	3.30634127	1.577122502	1.177275296	2.326650723	1.149375427	0.296345893	0.844218525
ENSMUSG00000070691	Runx3	runt related transcription factor 3	2.66033993	2.05644782	1.846484642	2.061062922	2.590779194	2.775313294	2.713220414	0	2.156083828	2.019828225	-0.136255603	0.817554591	0.973353259
ENSMUSG00000070692	Rps12-ps10	ribosomal protein S12, pseudogene 10	0	0	0	0	0	0	1.688464829	0	0	0.422116207	0.422116207	0.668370292	0.969741274
ENSMUSG00000004100	Ppan	peter pan homolog (Drosophila)	9.00867456	8.681926836	8.68674385	8.910405996	8.6580116	8.817498555	8.959627532	8.968386958	8.82193781	8.850881161	0.028943351	0.818407986	0.973353259
ENSMUSG00000096436	Olfr1437	olfactory receptor 1437	0	2.64754811	0	0	0	0	0	0	0.661887028	0	-0.661887028	0.405542433	0.925901209
ENSMUSG00000096437	Rps12-ps16	ribosomal protein S12, pseudogene 16	0	0	0	1.040994419	0	0	0	0	0.260248605	0	-0.260248605	0.830018289	0.973353259
ENSMUSG00000096433	Zfp994	zinc finger protein 994	7.733411499	7.161710274	7.752357535	7.157089108	7.679368445	7.555201841	8.009952576	7.802057709	7.451142104	7.761645143	0.310503039	0.120883798	0.572324359
ENSMUSG00000033703	Fuk	fucokinase	9.333021598	9.61965027	9.753129518	9.742537106	9.39498412	9.402285359	9.582838544	9.310170537	9.612084623	9.42256964	-0.189514983	0.087241668	0.488296341
ENSMUSG00000033701	Acbd6	acyl-Coenzyme A binding domain containing 6	10.23584673	10.22573584	10.46224869	10.14147839	9.563474034	10.25407813	10.27399939	9.610290791	10.26632741	9.925460587	-0.340866826	0.06003185	0.402462899
ENSMUSG00000033707	Lrrc24	leucine rich repeat containing 24	9.200969486	9.458378591	9.499082289	9.316739873	9.104996604	9.416460857	9.395530882	9.057024264	9.36879256	9.243503152	-0.125289408	0.310058483	0.856837972
ENSMUSG00000033706	Smyd5	SET and MYND domain containing 5	10.21274133	10.33328994	10.3122262	10.07088273	10.27141416	10.43468551	10.31234062	9.697321906	10.23228505	10.17894055	-0.053344504	0.828826185	0.973353259
ENSMUSG00000033705	Stard9	START domain containing 9	8.953990504	9.683868823	9.034998981	9.425031019	9.24775705	9.132896848	9.444686535	9.578826353	9.274472331	9.351041696	0.076569365	0.731451061	0.973353259
ENSMUSG00000037469	Acp7	acid phosphatase 7, tartrate resistant	5.087262684	4.826969182	5.523602472	3.659250993	6.761800276	5.269893977	4.669848268	4.895508649	4.774271333	5.399262792	0.624991459	0.126131738	0.581529522
ENSMUSG00000037466	4930427A07Rik	RIKEN cDNA 4930427A07 gene	5.409736973	5.956190697	4.500498474	6.1882405	5.707283082	5.721947949	4.605430475	5.076034537	5.513666661	5.277674011	-0.23599265	0.45269372	0.956861716
ENSMUSG00000037465	Klf10	Kruppel-like factor 10	9.139675518	10.74185012	10.89681042	10.62286789	9.645404404	10.45027115	10.26750894	9.494051785	10.35030099	9.964309071	-0.385991917	0.269745364	0.813868563
ENSMUSG00000037463	Fbxo27	F-box protein 27	9.020550138	8.990511886	9.257338522	9.466600948	8.864943217	8.779615975	8.806872538	8.573217259	9.183750373	8.756162247	-0.427588126	0.000766096	0.023178947
ENSMUSG00000037461	Ints7	integrator complex subunit 7	10.95258209	10.89172663	10.59167162	10.59255488	10.75768017	10.73606238	10.77180676	10.79478019	10.7571338	10.76508238	0.007948572	0.991371927	0.9978586
ENSMUSG00000104138	Gm36949	predicted gene, 36949	0	0	2.41333609	0	0	0	0	0	0.603334022	0	-0.603334022	0.451269301	0.955408935
ENSMUSG00000104132	Gm36952	predicted gene, 36952	3.667665513	0	0	2.061062922	2.005236078	0	0	0	1.432182109	0.50130902	-0.930873089	0.236657816	0.770278118
ENSMUSG00000104136	Gm36955	predicted gene, 36955	0	0	0	0	0	0	0	1.991176999	0	0.49779425	0.49779425	0.56486706	0.965516704
ENSMUSG00000031709	Tbc1d9	TBC1 domain family, member 9	11.74101615	11.43834299	11.77664051	11.38916411	11.09509972	11.46688373	11.45346296	11.79598467	11.58629094	11.45285777	-0.13343317	0.385245365	0.917141411
ENSMUSG00000031708	Tecr	trans-2,3-enoyl-CoA reductase	12.91930594	12.67049532	12.91737763	12.67726612	12.45095552	12.72193665	12.53950908	12.44458049	12.79611125	12.53924543	-0.25686582	0.008387487	0.121750153
ENSMUSG00000031706	Rfx1	regulatory factor X, 1 (influences HLA class II expression)	10.73198868	10.62066442	10.44533484	10.85147497	10.71001144	10.65169561	10.72992993	10.84153991	10.66236573	10.73329422	0.070928492	0.509176365	0.965516704
ENSMUSG00000031701	Dnaja2	DnaJ heat shock protein family (Hsp40) member A2	12.4798755	12.34827292	12.45371271	12.22039001	12.18034055	12.36955736	12.19422067	12.10327028	12.37556279	12.21184722	-0.163715572	0.065028761	0.419506476
ENSMUSG00000031700	Gpt2	glutamic pyruvate transaminase (alanine aminotransferase) 2	11.23906516	11.14554133	11.14689153	11.24195363	10.8548138	11.00705789	10.74962381	10.62213482	11.19336291	10.80840758	-0.384955333	4.77E-05	0.002878321
ENSMUSG00000031703	Itfg1	integrin alpha FG-GAP repeat containing 1	12.75464764	12.62045971	12.86042709	12.52171111	12.53298615	12.88596019	12.65017321	12.51668008	12.68931139	12.64644991	-0.04286148	0.705358389	0.96988229
ENSMUSG00000003458	Ncstn	nicastrin	11.01475921	10.99955842	11.10555962	11.10872443	11.03970843	11.10822423	10.99093286	10.95977341	11.05715042	11.02465973	-0.032490687	0.648656265	0.969741274
ENSMUSG00000023008	Fmnl3	formin-like 3	8.730017854	9.121769541	8.797515798	9.215142487	9.054087977	9.06027342	9.281620284	9.457882461	8.96611142	9.213466035	0.247354615	0.08670838	0.487019443
ENSMUSG00000023004	Tuba1b	tubulin, alpha 1B	13.6879207	13.8393388	13.9534649	13.70724337	13.53701713	13.63489754	13.8375526	13.71858883	13.79699194	13.68201402	-0.11497792	0.233408694	0.765321572
ENSMUSG00000023007	Prpf40b	pre-mRNA processing factor 40B	10.8827327	11.02675978	11.0717358	11.24824005	10.83748861	10.94178804	10.92565233	10.97691447	11.05736708	10.92046086	-0.13690622	0.115893491	0.559832138
ENSMUSG00000023000	Dhh	desert hedgehog	0	4.070221307	1.449333651	1.639366891	3.006106913	3.090278098	0	1.991176999	1.789730462	2.021890503	0.23216004	0.902002866	0.989433366
ENSMUSG00000003452	Bicd1	bicaudal D homolog 1 (Drosophila)	10.26109272	10.23836954	10.44264601	10.0436733	9.878875032	10.07129372	10.15245445	10.28170504	10.24644539	10.09608206	-0.150363333	0.184768916	0.691583468
ENSMUSG00000026032	Ndufb3	NADH dehydrogenase (ubiquinone) 1 beta subcomplex 3	9.477878653	9.71674388	9.712039181	9.69178033	10.26553757	9.807855485	9.673999282	9.664195455	9.649610511	9.852896949	0.203286438	0.107672736	0.541152719
ENSMUSG00000026031	Cflar	CASP8 and FADD-like apoptosis regulator	9.098250796	9.088662901	9.051564034	9.258139813	9.21153657	9.256244545	9.356921561	9.540908809	9.124154386	9.341402871	0.217248485	0.037018638	0.307637314
ENSMUSG00000026037	Orc2	origin recognition complex, subunit 2	9.684203324	9.667146034	9.747330638	9.47520194	9.407846363	9.497041239	9.467518091	9.271331299	9.643470484	9.410934248	-0.232536236	0.016060377	0.182371832
ENSMUSG00000026036	Nif3l1	Ngg1 interacting factor 3-like 1 (S. pombe)	8.814299178	8.736381542	8.87667633	8.646702639	8.839851973	9.082669103	8.777938073	9.224257767	8.768514922	8.981179229	0.212664307	0.074318365	0.450055439
ENSMUSG00000026035	Ppil3	peptidylprolyl isomerase (cyclophilin)-like 3	7.761989207	7.80915083	7.284553861	7.299496781	7.636298689	7.561594018	7.802926965	7.33702466	7.538797669	7.584461083	0.045663414	0.842063658	0.973353259
ENSMUSG00000026034	Clk1	CDC-like kinase 1	11.60220836	11.27993486	11.23499697	11.4536915	11.1605262	11.10986075	11.21996275	11.33363376	11.39270792	11.20599586	-0.186712058	0.052510032	0.371493598
ENSMUSG00000026039	Sgo2a	shugoshin 2A	5.514226022	4.157952906	4.705805117	5.207890725	4.466092426	5.418153019	3.949570471	2.797267076	4.896468692	4.157770748	-0.738697944	0.288194054	0.837352466
ENSMUSG00000082127	Gm13577	predicted gene 13577	4.47814862	3.236588011	4.385735942	3.882583475	3.913403719	4.276043866	4.392881974	4.44819295	3.995764012	4.257630627	0.261866615	0.632673752	0.969741274
ENSMUSG00000034285	Nipsnap1	nipsnap homolog 1	10.47794376	10.64553992	10.61335273	10.41171192	10.61984128	10.58501638	10.47891257	10.55047421	10.53713708	10.55856111	0.021424026	0.816413726	0.973353259
ENSMUSG00000000957	Mmp14	matrix metallopeptidase 14 (membrane-inserted)	8.289367158	8.317716843	8.158456762	8.352064621	8.830329098	8.478914689	8.640032493	8.759740494	8.279401346	8.677254194	0.397852848	0.000673384	0.021079103
ENSMUSG00000087333	Gm13652	predicted gene 13652	0	0	0	0	0	2.587621499	2.713220414	1.991176999	0	1.823004728	1.823004728	0.025922451	0.247515596
ENSMUSG00000073633	Fbxo36	F-box protein 36	5.514226022	5.160101171	5.006959543	5.72313878	5.788210379	5.269893977	5.957362703	5.632316622	5.351106379	5.66194592	0.310839541	0.270712502	0.814953588
ENSMUSG00000073631	Gm10553	predicted gene 10553	0	0	0	0	1.58961773	0	0	1.577122502	0	0.791685058	0.791685058	0.482429853	0.964147298
ENSMUSG00000087335	4930526F13Rik	RIKEN cDNA 4930526F13 gene	2.068014459	3.389405204	2.986096998	3.070993449	0	0	0	0	2.878627528	0	-2.878627528	0.000120335	0.005720573
ENSMUSG00000073639	Rab18	RAB18, member RAS oncogene family	11.43147679	11.6611304	11.67835375	11.53512736	11.28426182	11.53099191	11.55288809	11.47707243	11.57652207	11.46130356	-0.115218511	0.202317483	0.71875059
ENSMUSG00000082122	Gm11809	predicted gene 11809	0	0	0	0	1.003492829	0	0	0	0	0.250873207	0.250873207	0.846512451	0.973353259
ENSMUSG00000117891	---	---	0	0	1.846484642	0	0	0	0	0	0.46162116	0	-0.46162116	0.592102664	0.969741274
ENSMUSG00000049553	Polr1a	polymerase (RNA) I polypeptide A	10.21661802	10.27806959	10.37091737	10.18538342	10.24657	10.23520868	10.14822119	10.1706285	10.2627471	10.20015709	-0.062590012	0.40825861	0.927680748
ENSMUSG00000049551	Fzd9	frizzled class receptor 9	7.565234809	7.53380088	7.193661262	6.938159062	6.852406748	7.280844529	7.301322887	7.519669341	7.307714003	7.238560876	-0.069153127	0.717671297	0.972081295
ENSMUSG00000049550	Clip1	CAP-GLY domain containing linker protein 1	11.52771221	11.58749892	12.20855717	11.4476949	11.73617103	11.91139433	11.61248831	11.76630446	11.6928658	11.75658953	0.063723735	0.823051675	0.973353259
ENSMUSG00000049556	Lingo1	leucine rich repeat and Ig domain containing 1	13.28704537	13.50313696	13.77935433	13.46063319	12.82455955	13.49954442	13.24368403	13.06487394	13.50754246	13.15816549	-0.349376978	0.019093682	0.203156778
ENSMUSG00000049555	Tmie	transmembrane inner ear	6.019298013	6.340623161	5.817270352	5.751738801	6.852406748	6.951531638	6.932638589	6.480208437	5.982232582	6.804196353	0.821963771	0.000118579	0.005657766
ENSMUSG00000069678	Pcgf1	polycomb group ring finger 1	7.783057022	7.711041753	7.936905652	7.80840559	8.328883567	7.807306973	8.311960811	7.674781892	7.809852504	8.03073331	0.220880806	0.151289318	0.632999741
ENSMUSG00000069670	Nkain2	Na+/K+ transporting ATPase interacting 2	9.730127192	10.40452311	10.23455947	9.633420479	10.64812146	10.38958925	10.40632475	10.44561326	10.00065756	10.47241218	0.471754618	0.005261427	0.088757439
ENSMUSG00000069581	Tspear	thrombospondin type laminin G domain and EAR repeats	4.545452185	2.382061721	2.819232083	4.163686085	3.591359576	4.076249871	3.134381001	2.797267076	3.477608019	3.399814381	-0.077793638	0.668316344	0.969741274
ENSMUSG00000069588	Gm11733	predicted gene 11733	3.079044871	2.382061721	0	2.652653363	4.006542134	3.567705506	4.605430475	0	2.028439989	3.044919529	1.01647954	0.108464689	0.543686068
ENSMUSG00000046269	Usp27x	ubiquitin specific peptidase 27, X chromosome	8.779778302	7.566231562	6.71217115	6.454947835	6.889561285	6.537134393	8.956402907	8.870892067	7.378282212	7.813497663	0.435215451	0.501511685	0.965516704
ENSMUSG00000030816	Rnf40	ring finger protein 40	10.82041037	10.91079389	10.92212543	11.02626005	10.87579606	11.03661169	10.86589614	10.78913049	10.91989744	10.89185859	-0.028038841	0.749734833	0.973353259
ENSMUSG00000117008	---	---	0	0	0	0	1.58961773	0	0	0	0	0.397404432	0.397404432	0.678492791	0.969741274
ENSMUSG00000022353	Mtss1	metastasis suppressor 1	9.793790549	9.915481848	9.767525557	9.490131385	10.29583773	9.825226337	10.08170575	10.38483752	9.741732335	10.14690184	0.4051695	0.002147747	0.048211034
ENSMUSG00000022350	Washc5	WASH complex subunit 5	10.5747536	10.46811967	10.55645533	10.32396519	10.45508855	10.41892965	10.40750593	10.32696948	10.48082345	10.4021234	-0.078700047	0.32514924	0.869518052
ENSMUSG00000022351	Sqle	squalene epoxidase	10.3683708	10.79669386	10.66809108	10.6844319	10.66696881	10.96004873	10.96709793	10.8092072	10.62939691	10.85083067	0.221433755	0.046601784	0.347391159
ENSMUSG00000074346	Kcnd3os	potassium voltage-gated channel, Shal-related family, member 3, opposite strand	5.174886192	5.394888389	4.752870796	4.885399987	5.734766344	4.276043866	5.005574998	4.44819295	5.052011341	4.866144539	-0.185866802	0.800967779	0.973353259
ENSMUSG00000022357	Klhl38	kelch-like 38	3.783704699	4.595173254	4.885501747	5.326712852	4.650554971	4.995556428	4.31445375	4.076382183	4.647773138	4.509236833	-0.138536305	0.621564741	0.969741274
ENSMUSG00000022354	Ndufb9	NADH dehydrogenase (ubiquinone) 1 beta subcomplex, 9	10.8876041	11.18523375	11.05950286	11.25512361	11.28368044	11.12935548	11.02903579	10.99034151	11.09686608	11.1081033	0.011237224	0.927956493	0.9978586
ENSMUSG00000089376	Gm22136	predicted gene, 22136	0	0	0	0	0	0	0	1.577122502	0	0.394280625	0.394280625	0.681264798	0.969741274
ENSMUSG00000076038	Gm22774	predicted gene, 22774	1.04569736	0	0.899492338	0	1.003492829	0.875920088	0	1.577122502	0.486297424	0.864133855	0.37783643	0.663090429	0.969741274
ENSMUSG00000022359	Wdyhv1	WDYHV motif containing 1	7.941362906	7.981370306	7.858380949	7.907058138	7.62899371	8.220733369	7.926721574	7.602994137	7.922043075	7.844860698	-0.077182377	0.741468614	0.973353259
ENSMUSG00000089371	Mir1938	microRNA 1938	0	1.037876205	0.899492338	1.040994419	0	0	0	0	0.74459074	0	-0.74459074	0.557277778	0.965516704
ENSMUSG00000105770	Mir664	microRNA 664	0	1.037876205	0	0	0	0	0	0	0.259469051	0	-0.259469051	0.830018289	0.973353259
ENSMUSG00000105771	2900064K03Rik	RIKEN cDNA 2900064K03 gene	2.068014459	0	2.41333609	0	0	1.809634363	2.445268757	0	1.120337637	1.06372578	-0.056611857	0.937767555	0.9978586
ENSMUSG00000105772	Gm42496	predicted gene 42496	0	0	0	3.070993449	0	0	0	0	0.767748362	0	-0.767748362	0.308217402	0.855799126
ENSMUSG00000105774	Gm43006	predicted gene 43006	0	0	0	0	0	0	0	1.991176999	0	0.49779425	0.49779425	0.56486706	0.965516704
ENSMUSG00000105775	Gm10290	predicted pseudogene 10290	0	2.05644782	0	1.040994419	0	0.875920088	0	0	0.77436056	0.218980022	-0.555380538	0.528816583	0.965516704
ENSMUSG00000105776	Gm43292	predicted gene 43292	3.403168963	2.05644782	3.135647341	2.652653363	2.005236078	1.809634363	2.115933218	2.989701238	2.811979372	2.230126224	-0.581853148	0.342403109	0.88430202
ENSMUSG00000105779	Gm6439	predicted gene 6439	0	1.635246308	0.899492338	1.040994419	1.003492829	0	0	1.577122502	0.893933266	0.645153833	-0.248779433	0.831048045	0.973353259
ENSMUSG00000086946	Gm15527	predicted gene 15527	0	0	0	0	1.58961773	0	1.688464829	0	0	0.81952064	0.81952064	0.468290437	0.958562956
ENSMUSG00000039384	Dusp10	dual specificity phosphatase 10	7.597306794	7.926216918	7.506768352	7.64268241	7.76849638	7.965109388	7.906812829	7.913085129	7.668243619	7.888375931	0.220132313	0.11939262	0.568622028
ENSMUSG00000097706	E030037K01Rik	RIKEN cDNA E030037K01 gene	4.255061632	4.318870111	4.554628506	4.83282835	4.591649679	4.395355878	4.954769966	4.15880572	4.49034715	4.525145311	0.034798161	0.911536294	0.99365612
ENSMUSG00000008540	Mgst1	microsomal glutathione S-transferase 1	6.922116114	6.89431728	6.901604216	6.308625971	7.18683831	6.600589153	6.919451112	7.217121483	6.756665895	6.981000015	0.22433412	0.291721184	0.840708399
ENSMUSG00000034863	Ano8	anoctamin 8	11.34793302	11.46599986	11.52495977	11.85891083	11.57160079	11.6365629	11.62116881	11.50195561	11.54945087	11.58282203	0.033371156	0.842385094	0.973353259
ENSMUSG00000088025	Rprl3	ribonuclease P RNA-like 3	0	0	0	1.639366891	0	0	0	0	0.409841723	0	-0.409841723	0.662772563	0.969741274
ENSMUSG00000034867	Ankrd27	ankyrin repeat domain 27 (VPS9 domain)	10.27850567	10.3285712	10.44801867	10.58760548	10.0917792	10.21304699	10.26750894	10.30903376	10.41067526	10.22034222	-0.190333032	0.040883456	0.324546115
ENSMUSG00000092848	Gm23263	predicted gene, 23263	0	0	0	0	0	0.875920088	0	0	0	0.218980022	0.218980022	0.846512451	0.973353259
ENSMUSG00000037960	Card19	caspase recruitment domain family, member 19	7.020013646	7.182779658	6.992652669	7.347131941	7.80784591	7.448876566	7.418441822	7.681768045	7.135644478	7.589233086	0.453588607	0.004389592	0.077885373
ENSMUSG00000077633	Gm22148	predicted gene, 22148	0	0	0	0	0	1.417032207	0	0	0	0.354258052	0.354258052	0.70871864	0.96988229
ENSMUSG00000077630	Gm22149	predicted gene, 22149	0	1.037876205	0	0	0	0	0	0	0.259469051	0	-0.259469051	0.830018289	0.973353259
ENSMUSG00000077637	Gm22771	predicted gene, 22771	5.99542741	5.931507328	6.116184809	5.72313878	5.83974512	5.972765709	5.957362703	5.743330419	5.941564582	5.878300988	-0.063263594	0.749315289	0.973353259
ENSMUSG00000045795	Whamm	WAS protein homolog associated with actin, golgi membranes and microtubules	9.259765118	9.315454269	9.118233728	9.598418198	9.029331651	9.175195411	9.085990371	9.259706127	9.322967828	9.13755589	-0.185411938	0.1077628	0.541443187
ENSMUSG00000077639	Gm22772	predicted gene, 22772	1.04569736	1.037876205	0	2.061062922	1.58961773	1.417032207	2.115933218	0.994123999	1.036159122	1.529176788	0.493017667	0.652971662	0.969741274
ENSMUSG00000045790	Ccdc149	coiled-coil domain containing 149	10.79037887	10.76561032	10.99795366	10.97335754	10.45302164	10.69740106	10.5144296	10.45175671	10.8818251	10.52915225	-0.352672845	0.000155824	0.007105568
ENSMUSG00000048154	Kmt2d	lysine (K)-specific methyltransferase 2D	12.76394976	12.93236587	12.95087767	13.01711591	12.80767396	12.76740479	12.90537364	12.57365794	12.9160773	12.76352759	-0.152549715	0.104106302	0.532357742
ENSMUSG00000079685	Ulbp1	UL16 binding protein 1	3.403168963	4.530898564	2.41333609	2.061062922	3.328209112	2.117931851	2.115933218	3.988962792	3.102116635	2.887759243	-0.214357392	0.640561119	0.969741274
ENSMUSG00000102202	Gm33280	predicted gene, 33280	3.403168963	3.06564474	3.80541029	4.536709089	4.530236522	4.65650582	4.467265589	4.076382183	3.702733271	4.432597528	0.729864258	0.126603885	0.582623169
ENSMUSG00000102205	9430092D12Rik	RIKEN cDNA 9430092D12 gene	3.250190284	5.026626884	3.973791331	3.775234473	4.960948988	3.757841642	3.134381001	4.895508649	4.006460743	4.18717007	0.180709327	0.666595663	0.969741274
ENSMUSG00000102204	Gm36958	predicted gene, 36958	1.645576219	1.635246308	0.899492338	1.040994419	1.003492829	0.875920088	1.078314528	1.577122502	1.305327321	1.133712487	-0.171614834	0.819662704	0.973353259
ENSMUSG00000102207	Gm10344	predicted gene 10344	3.250190284	1.635246308	2.157573411	0	0	0	2.115933218	0	1.7607525	0.528983305	-1.231769196	0.201569839	0.717212046
ENSMUSG00000102206	Pcdha11	protocadherin alpha 11	8.038005567	8.254441165	7.675048257	8.052086333	7.693443962	7.901022304	8.028496499	7.5657147	8.004895331	7.797169366	-0.207725964	0.194216107	0.707287863
ENSMUSG00000116114	---	---	4.407550957	5.072504157	4.261049233	4.83282835	4.176515485	5.603037346	4.31445375	3.689572954	4.643483174	4.445894884	-0.19758829	0.951240086	0.9978586
ENSMUSG00000089959	Gm16268	predicted gene 16268	3.250190284	2.05644782	1.846484642	3.242017635	3.176128642	2.117931851	1.688464829	1.577122502	2.598785095	2.139911956	-0.458873139	0.523122085	0.965516704
ENSMUSG00000089958	Gm16165	predicted gene 16165	0	1.037876205	0	0	1.003492829	0.875920088	1.078314528	0	0.259469051	0.739431861	0.47996281	0.647929422	0.969741274
ENSMUSG00000089953	Rnf224	ring finger protein 224	1.04569736	0	0	0	0	0	0	0	0.26142434	0	-0.26142434	0.830018289	0.973353259
ENSMUSG00000089952	4933413C19Rik	RIKEN cDNA 4933413C19 gene	0	0	0	0	1.58961773	0	0	0	0	0.397404432	0.397404432	0.678492791	0.969741274
ENSMUSG00000089951	Gm14435	predicted gene 14435	5.174886192	5.627820819	5.439791447	5.570960747	5.254721557	5.389695085	5.434280405	5.660881138	5.453364801	5.434894546	-0.018470255	0.932544561	0.9978586
ENSMUSG00000089950	Gm16215	predicted gene 16215	0	1.037876205	0	0	0	0	0	0	0.259469051	0	-0.259469051	0.830018289	0.973353259
ENSMUSG00000089957	A830011K09Rik	RIKEN cDNA A830011K09 gene	4.255061632	5.688005168	4.842632075	4.83282835	6.136160803	5.651783863	5.673006494	6.19783711	4.904631806	5.914697067	1.010065261	0.003239755	0.064032795
ENSMUSG00000006241	Ccdc159	coiled-coil domain containing 159	8.259613631	8.327209869	8.279919683	8.596341069	8.52659451	8.499036409	8.474071381	8.688692108	8.365771063	8.547098602	0.181327539	0.137240136	0.605936483
ENSMUSG00000027401	Tgm3	transglutaminase 3, E polypeptide	6.857375301	6.58177696	7.040857681	7.113678721	5.83974512	6.152892446	6.809372944	6.603054461	6.898422166	6.351266243	-0.547155923	0.026987482	0.254037284
ENSMUSG00000042211	Fbxo38	F-box protein 38	10.54525667	10.34501972	10.44623	10.32753197	9.962620121	10.26391117	10.32614763	10.41449731	10.41600959	10.24179406	-0.174215531	0.121505318	0.573519263
ENSMUSG00000042210	Abhd14a	abhydrolase domain containing 14A	9.274717021	9.113563832	9.10014768	9.057979988	9.023772074	9.149965378	9.103588021	8.892130497	9.13660213	9.042363992	-0.094238138	0.361376165	0.90198317
ENSMUSG00000042213	Zfand4	zinc finger, AN1-type domain 4	6.612604945	6.448944514	6.804420316	5.912365933	6.636263535	6.357767982	6.39861682	6.363405852	6.444583927	6.439013547	-0.00557038	0.850660301	0.97362733
ENSMUSG00000042215	Bag2	BCL2-associated athanogene 2	7.565234809	8.113425261	8.335088022	8.319000433	7.474543448	7.969923232	8.146381337	7.948273385	8.083187131	7.884780351	-0.19840678	0.272469136	0.817375361
ENSMUSG00000042216	Sgsm1	small G protein signaling modulator 1	12.49511696	12.78040488	13.08652854	12.80322509	12.08445897	12.34127597	12.27117999	12.12489735	12.79131887	12.20545307	-0.585865797	6.35E-07	9.39E-05
ENSMUSG00000039878	Slc39a5	solute carrier family 39 (metal ion transporter), member 5	3.079044871	2.05644782	0	2.652653363	3.591359576	2.775313294	0	0	1.947036514	1.591668217	-0.355368296	0.933395622	0.9978586
ENSMUSG00000045248	Med26	mediator complex subunit 26	8.171818664	8.298541315	8.695804981	8.388947047	8.296973832	8.475533615	8.45134412	8.212265186	8.388778002	8.359029188	-0.029748814	0.767462538	0.973353259
ENSMUSG00000114266	AC158537.1	---	1.645576219	3.06564474	0	1.639366891	2.005236078	0	1.688464829	2.575155827	1.587646962	1.567214183	-0.020432779	0.88351615	0.982813574
ENSMUSG00000114267	CT009480.1	---	3.403168963	3.389405204	3.135647341	0	3.328209112	2.117931851	3.459970513	2.312514971	2.482055377	2.804656612	0.322601235	0.957942038	0.9978586
ENSMUSG00000114260	AC090659.1	---	0	0	0	0	0	0	0	2.575155827	0	0.643788957	0.643788957	0.425793562	0.93752711
ENSMUSG00000032425	Zfp949	zinc finger protein 949	9.342513992	9.127214199	9.222232486	9.338115442	9.166836391	9.287430849	9.132448677	9.2897389	9.257519029	9.219113704	-0.038405325	0.690791823	0.969741274
ENSMUSG00000032420	Nt5e	5 nucleotidase, ecto	7.589355391	6.688749398	6.378752606	7.03441813	7.506784654	7.666139499	7.301322887	7.010682732	6.922818881	7.371232443	0.448413562	0.106011283	0.536158655
ENSMUSG00000032423	Syncrip	synaptotagmin binding, cytoplasmic RNA interacting protein	11.21987959	11.20274516	11.25505862	11.08924654	10.89190719	11.0939628	11.19623813	10.916008	11.19173248	11.02452903	-0.167203445	0.069195302	0.434444147
ENSMUSG00000032422	Snx14	sorting nexin 14	10.68984821	10.52181442	10.80697824	10.54330263	10.55483108	10.75570839	10.59543533	10.4155454	10.64048588	10.58038005	-0.060105825	0.553570475	0.965516704
ENSMUSG00000084828	Gm12367	predicted gene 12367	4.084528611	3.06564474	2.819232083	4.469424261	3.176128642	3.925812223	3.841853679	4.988593426	3.609707424	3.983096992	0.373389569	0.47498925	0.962049416
ENSMUSG00000039396	Neil3	nei like 3 (E. coli)	0	2.382061721	1.846484642	0	3.813834889	0	0	3.796423229	1.057136591	1.90256453	0.845427939	0.198914405	0.714210157
ENSMUSG00000084822	Myadml2os	myeloid-associated differentiation marker-like 2, opposite strand	3.250190284	2.8716894	2.41333609	2.652653363	3.176128642	1.809634363	2.939114924	2.312514971	2.796967284	2.559348225	-0.237619059	0.758644519	0.973353259
ENSMUSG00000084826	AI847159	expressed sequence AI847159	3.250190284	1.635246308	2.630511888	4.163686085	3.006106913	3.567705506	4.392881974	4.076382183	2.919908641	3.760769144	0.840860503	0.254645645	0.791922155
ENSMUSG00000105558	Gm5855	predicted gene 5855	0	1.037876205	1.846484642	0	2.005236078	0.875920088	1.078314528	0	0.721090212	0.989867674	0.268777462	0.833901639	0.973353259
ENSMUSG00000029090	Adgra3	adhesion G protein-coupled receptor A3	9.54724836	9.757689323	9.738588378	9.69178033	9.616147049	9.526747836	9.352021927	9.509840494	9.683826598	9.501189326	-0.182637271	0.053470843	0.375613843
ENSMUSG00000034432	Cops8	COP9 signalosome subunit 8	10.33071082	10.30714375	10.35670497	10.12380884	10.1220146	10.27562302	10.22392365	10.17310947	10.27959209	10.19866768	-0.080924407	0.323968217	0.868559171
ENSMUSG00000090272	Mndal	myeloid nuclear differentiation antigen like	4.333320076	4.070221307	3.973791331	5.122865449	5.051160406	4.749025824	5.005574998	5.380822891	4.375049541	5.04664603	0.671596489	0.081634551	0.473432935
ENSMUSG00000079575	Rbpsuh-rs3	recombining binding protein suppressor of hairless (Drosophila), related sequence 3	6.29826552	6.395800231	6.116184809	6.145771189	5.679266081	5.873500455	5.850248223	6.527509914	6.239005437	5.982631168	-0.256374269	0.354943629	0.896980609
ENSMUSG00000031143	Ccdc22	coiled-coil domain containing 22	9.654025824	9.462691909	9.455289533	9.843977967	8.910844538	9.369871868	9.1857425	9.155662676	9.603996308	9.155530395	-0.448465913	0.000452492	0.015447646
ENSMUSG00000092255	Gm20455	predicted gene 20455	1.645576219	0	0	0	0	0	0	0	0.411394055	0	-0.411394055	0.662772563	0.969741274
ENSMUSG00000029095	Ablim2	actin-binding LIM protein 2	11.93937304	11.57659546	11.72925361	11.73008779	11.81714522	12.08006073	11.55342175	11.56801516	11.74382747	11.75466071	0.010833242	0.862372504	0.976963739
ENSMUSG00000044117	2900011O08Rik	RIKEN cDNA 2900011O08 gene	12.23431191	12.38821902	12.45259946	12.4134369	12.28106272	12.45787449	12.38078313	12.15971611	12.37214182	12.31985911	-0.052282711	0.566548668	0.966916189
ENSMUSG00000083483	Gm14044	predicted gene 14044	0	2.05644782	1.449333651	0	1.003492829	1.809634363	1.078314528	1.577122502	0.876445368	1.367141056	0.490695688	0.775717794	0.973353259
ENSMUSG00000041548	Hspb8	heat shock protein 8	8.429572298	8.750562237	8.435871804	8.459998304	8.407836066	8.183917215	8.281361638	8.753122739	8.519001161	8.406559414	-0.112441746	0.486352713	0.965337603
ENSMUSG00000114702	AL589742.1	---	2.068014459	2.05644782	1.449333651	2.652653363	2.32751257	2.587621499	0	0	2.056612323	1.228783517	-0.827828806	0.657010441	0.969741274
ENSMUSG00000041544	Disp3	dispatched RND transporter family member 3	10.61447407	10.95432797	10.79859108	11.11079583	10.76686139	10.53147936	10.55016315	10.71018458	10.86954724	10.63967212	-0.229875117	0.035942596	0.302757073
ENSMUSG00000058093	Zfp729b	zinc finger protein 729b	8.573563649	8.359952017	8.653024139	8.255509662	8.506803882	8.32585956	8.759554843	8.476096937	8.460512367	8.517078805	0.056566438	0.699976701	0.96988229
ENSMUSG00000041540	Sox5	SRY (sex determining region Y)-box 5	10.44417432	10.25711504	10.38312255	10.14147839	9.62535387	10.19157027	9.993215872	10.06505051	10.30647257	9.968797631	-0.337674943	0.008572181	0.1233652
ENSMUSG00000024598	Fbn2	fibrillin 2	6.718466702	6.907033991	6.451886068	5.937480722	7.301553638	6.297770363	7.082145807	7.639334484	6.50371687	7.080201073	0.576484202	0.030544953	0.274105961
ENSMUSG00000050640	Tmem150c	transmembrane protein 150C	9.731934086	9.629275337	10.12925008	8.858754091	10.43428501	9.907821507	10.31863292	10.3686939	9.587303398	10.25735833	0.670054937	0.027288503	0.255526274
ENSMUSG00000024592	C330018D20Rik	RIKEN cDNA C330018D20 gene	8.038005567	6.182251265	7.717190342	7.680363554	7.858696133	8.272306559	8.046805086	7.976955205	7.404452682	8.038690746	0.634238064	0.075231839	0.452752695
ENSMUSG00000024593	Megf10	multiple EGF-like-domains 10	10.18662707	10.51456182	9.898875275	10.33935793	10.27375811	9.996597274	10.05783187	10.42806336	10.23485552	10.18906266	-0.045792867	0.707010208	0.96988229
ENSMUSG00000024590	Lmnb1	lamin B1	8.150360731	8.107928215	7.99678632	7.794727119	8.849312402	8.035683004	7.997456202	8.406111055	8.012450596	8.322140666	0.30969007	0.066179859	0.423593564
ENSMUSG00000000168	Dlat	dihydrolipoamide S-acetyltransferase (E2 component of pyruvate dehydrogenase complex)	11.30366665	11.45792038	11.62756652	11.49233821	11.48473305	11.59860208	11.41521907	11.28972485	11.47037294	11.44706976	-0.023303176	0.80541361	0.973353259
ENSMUSG00000024594	Prrc1	proline-rich coiled-coil 1	9.411783359	9.284113657	9.352084779	9.507006548	9.702197118	9.493702429	9.638223204	9.709337165	9.388747086	9.635864979	0.247117894	0.00849533	0.122646281
ENSMUSG00000070960	Gm19680	predicted gene, 19680	4.255061632	4.463626252	4.500498474	4.536709089	4.530236522	4.076249871	4.31445375	5.346064338	4.438973862	4.566751121	0.127777259	0.584641423	0.969741274
ENSMUSG00000019179	Mdh2	malate dehydrogenase 2, NAD (mitochondrial)	12.49936649	12.5365057	12.73802402	12.50159151	12.53029295	12.60379955	12.61097675	12.32166117	12.56887193	12.51668261	-0.052189323	0.581334797	0.969741274
ENSMUSG00000032301	Psma4	proteasome (prosome, macropain) subunit, alpha type 4	10.42754607	10.22065122	10.26430352	10.05948861	10.36232301	10.32624248	10.28945837	10.38483752	10.24299736	10.34071535	0.097717989	0.31413452	0.859531382
ENSMUSG00000114709	AC157650.3	---	2.66033993	3.876923321	2.41333609	3.070993449	2.813337462	2.117931851	3.949570471	4.310743152	3.005398198	3.297895734	0.292497536	0.487243579	0.965516704
ENSMUSG00000075090	Olfr1234	olfactory receptor 1234	0	0	0	0	0	1.417032207	0	0	0	0.354258052	0.354258052	0.70871864	0.96988229
ENSMUSG00000057531	Dtnbp1	dystrobrevin binding protein 1	10.18794407	10.34268138	10.25002087	10.3180009	10.36781901	10.11540961	10.08908604	9.764670482	10.2746618	10.08424629	-0.190415516	0.139844376	0.610819125
ENSMUSG00000032305	Fam219b	family with sequence similarity 219, member B	8.8579758	9.140736619	8.892525767	9.141404762	9.189359596	8.957380095	8.910484625	8.886094211	9.008160737	8.985829632	-0.022331105	0.847095207	0.973353259
ENSMUSG00000041895	Wipi1	WD repeat domain, phosphoinositide interacting 1	9.145110023	9.209080039	9.220140579	9.215142487	9.476609223	9.492030121	9.234477719	9.641083628	9.197368282	9.461050173	0.263681891	0.008763975	0.125262202
ENSMUSG00000041890	Git2	G protein-coupled receptor kinase-interactor 2	10.39256143	10.1845481	10.14256577	10.18930932	10.10236788	10.04302014	10.18036316	10.26900424	10.22724615	10.14868885	-0.0785573	0.382427189	0.915024491
ENSMUSG00000041891	Lman1	lectin, mannose-binding, 1	10.20495657	10.1177416	10.30039394	10.00707127	10.24178888	10.23920176	10.34845971	10.07569768	10.15754085	10.22628701	0.068746161	0.482899816	0.964147298
ENSMUSG00000083885	Gm13213	predicted gene 13213	1.645576219	1.635246308	0	0	0	1.417032207	3.725440712	1.577122502	0.820205632	1.679898855	0.859693224	0.20662848	0.72637169
ENSMUSG00000047492	Inhbe	inhibin beta-E	3.250190284	4.070221307	3.394994784	2.652653363	2.005236078	3.348651568	3.134381001	4.44819295	3.342014934	3.234115399	-0.107899535	0.921308815	0.996894989
ENSMUSG00000047495	Dlgap2	discs, large (Drosophila) homolog-associated protein 2	10.84399344	11.29815134	11.35853412	11.12726086	10.80625494	10.82243617	10.8213919	11.01958621	11.15698494	10.8674173	-0.289567631	0.008844044	0.125915207
ENSMUSG00000047496	Rnf152	ring finger protein 152	8.561421027	9.031738799	9.118233728	8.255509662	8.259619834	9.173109679	8.770612867	8.702497637	8.741725804	8.726460004	-0.0152658	0.920556303	0.996715418
ENSMUSG00000047497	Adamts12	a disintegrin-like and metallopeptidase (reprolysin type) with thrombospondin type 1 motif, 12	3.079044871	3.527574467	2.819232083	3.070993449	3.591359576	3.090278098	3.598803161	0	3.124211217	2.570110209	-0.554101009	0.908075238	0.991779977
ENSMUSG00000051118	Olfr77	olfactory receptor 77	0	0	3.135647341	3.070993449	4.176515485	3.462332101	2.939114924	3.574171483	1.551660198	3.538033498	1.986373301	0.074572992	0.450804775
ENSMUSG00000051113	Fam71e1	family with sequence similarity 71, member E1	4.255061632	5.565016072	6.023262006	5.400817042	6.029237949	6.266809174	5.641227527	6.096919779	5.311039188	6.008548607	0.697509419	0.07420515	0.449796501
ENSMUSG00000051111	Sv2c	synaptic vesicle glycoprotein 2c	10.96492648	10.31193298	10.16557652	10.5091592	11.4684542	11.38994968	10.62924045	9.881537931	10.48789879	10.84229557	0.354396771	0.24645821	0.78190728
ENSMUSG00000056724	Nbeal2	neurobeachin-like 2	9.242123095	9.490418463	9.261413039	9.32390031	9.666964512	9.368049587	10.15104474	10.11751754	9.329463727	9.825894095	0.496430369	0.000992912	0.028072399
ENSMUSG00000014837	4931428F04Rik	RIKEN cDNA 4931428F04 gene	9.287059648	9.438807463	9.677388328	9.431674848	9.755161979	9.579670383	10.04574513	9.731389158	9.458732572	9.777991661	0.31925909	0.009445204	0.131368594
ENSMUSG00000000838	Fmr1	fragile X mental retardation syndrome 1	11.25548875	11.11845974	11.2647321	11.08292953	10.86573157	11.11530243	10.94123234	10.93220988	11.18040253	10.96361906	-0.216783471	0.010803418	0.142172442
ENSMUSG00000105550	Gm35585	predicted gene, 35585	3.541470204	2.05644782	2.41333609	2.061062922	2.32751257	2.587621499	2.115933218	0	2.518079259	1.757766822	-0.760312437	0.405906174	0.926193801
ENSMUSG00000066113	Adamtsl1	ADAMTS-like 1	7.365553028	7.53380088	7.059697557	6.999069328	7.955316275	7.930955085	7.900115057	8.341406951	7.239530198	8.031948342	0.792418144	3.41E-06	0.000359894
ENSMUSG00000024266	Adad2	adenosine deaminase domain containing 2	3.250190284	2.05644782	1.449333651	0	3.328209112	1.809634363	2.713220414	0	1.688992939	1.962765972	0.273773033	0.761398949	0.973353259
ENSMUSG00000066116	Gm10154	predicted gene 10154	2.394364844	3.389405204	2.819232083	4.536709089	4.530236522	3.567705506	3.459970513	3.311334	3.284927805	3.717311635	0.43238383	0.605220268	0.969741274
ENSMUSG00000057455	Rit2	Ras-like without CAAX 2	10.55549629	10.6379315	10.68487429	10.37426508	10.6793983	10.63966178	10.5045285	10.36544339	10.56314179	10.54725799	-0.015883798	0.878079918	0.981477254
ENSMUSG00000057454	Lypd3	Ly6/Plaur domain containing 3	0	0	0	2.061062922	0	0	0	0	0.51526573	0	-0.51526573	0.540781741	0.965516704
ENSMUSG00000057457	Phex	phosphate regulating endopeptidase homolog, X-linked	7.144617915	5.565016072	4.842632075	5.326712852	6.072962523	7.036588885	5.235793501	4.632553048	5.719744729	5.744474489	0.024729761	0.97446718	0.9978586
ENSMUSG00000024261	Syt4	synaptotagmin IV	12.5970279	12.4273647	12.74695133	12.32995339	12.1837722	12.58744758	12.57147615	12.368146	12.52532433	12.42771048	-0.097613846	0.410163772	0.929727851
ENSMUSG00000085067	Gm15631	predicted gene 15631	8.490612886	8.617619824	8.680671323	8.37981446	7.978493046	8.560964529	8.514099443	8.488102517	8.542179623	8.385414884	-0.15676474	0.324237922	0.868863959
ENSMUSG00000082289	Gm15596	predicted gene 15596	2.394364844	1.635246308	0.899492338	0	0	0	0	0	1.232275872	0	-1.232275872	0.170276377	0.6691151
ENSMUSG00000082286	Pisd-ps1	phosphatidylserine decarboxylase, pseudogene 1	10.7729331	11.43724753	10.65962569	11.4774317	10.96552644	10.48263144	10.97508674	11.08230706	11.08680951	10.87638792	-0.210421587	0.190545149	0.701522625
ENSMUSG00000082284	H3f3a-ps1	H3 histone, family 3A, pseudogene 1	2.884829173	2.8716894	3.135647341	3.070993449	3.813834889	3.090278098	3.725440712	2.797267076	2.990789841	3.356705194	0.365915353	0.420657866	0.93752711
ENSMUSG00000098824	Mir7006	microRNA 7006	1.04569736	2.05644782	1.449333651	1.639366891	1.58961773	1.809634363	2.445268757	2.797267076	1.547711431	2.160446981	0.612735551	0.375798002	0.911822278
ENSMUSG00000098826	Mir7677	microRNA 7677	1.04569736	1.037876205	0.899492338	1.040994419	1.003492829	0.875920088	1.078314528	0.994123999	1.00601508	0.987962861	-0.018052219	0.981393144	0.9978586
ENSMUSG00000080613	Gm22151	predicted gene, 22151	1.645576219	0	0.899492338	0	1.003492829	0.875920088	0	0	0.636267139	0.469853229	-0.16641391	0.805649984	0.973353259
ENSMUSG00000080610	Snord110	small nucleolar RNA, C/D box 110	1.04569736	1.037876205	1.449333651	1.040994419	1.003492829	0.875920088	1.078314528	0.994123999	1.143475409	0.987962861	-0.155512548	0.825776215	0.973353259
ENSMUSG00000080615	Snord99	small nucleolar RNA, C/D box 99	1.04569736	1.037876205	0.899492338	1.040994419	1.003492829	0.875920088	1.078314528	0.994123999	1.00601508	0.987962861	-0.018052219	0.981393144	0.9978586
ENSMUSG00000105552	Gm19710	predicted gene, 19710	5.04137088	4.979242675	4.554628506	5.078396742	3.913403719	4.33693292	4.538001383	4.743549337	4.913409701	4.38297184	-0.530437861	0.124870114	0.578918522
ENSMUSG00000085395	Gm13056	predicted gene 13056	0	0	0	0	0	1.809634363	0	3.311334	0	1.280242091	1.280242091	0.095255352	0.509138615
ENSMUSG00000085397	Gm13524	predicted gene 13524	4.333320076	4.157952906	3.61474788	3.775234473	4.650554971	4.451504748	4.392881974	4.381104338	3.970313834	4.469011508	0.498697674	0.18953683	0.699675354
ENSMUSG00000085396	Firre	functional intergenic repeating RNA element	10.96415804	10.83546134	10.73993557	11.07517098	11.32382168	11.10713219	11.34050439	11.4690183	10.90368148	11.31011914	0.406437658	8.25E-05	0.004376655
ENSMUSG00000085391	Gm16150	predicted gene 16150	0	0	0	0	0	0	2.445268757	0	0	0.611317189	0.611317189	0.456371897	0.956861716
ENSMUSG00000085399	Foxd2os	forkhead box D2, opposite strand	0	2.382061721	0	0	4.094030572	2.775313294	3.30634127	3.159462173	0.59551543	3.333786827	2.738271397	0.002642736	0.055768404
ENSMUSG00000085398	4931406G06Rik	RIKEN cDNA 4931406G06 gene	0	0	1.846484642	3.242017635	0	3.66590362	0	0	1.272125569	0.916475905	-0.355649664	0.978559081	0.9978586
ENSMUSG00000082712	Olfr990-ps1	olfactory receptor 990, pseudogene 1	0	0	0	1.639366891	0	0	1.078314528	0	0.409841723	0.269578632	-0.140263091	0.816860842	0.973353259
ENSMUSG00000098790	Mir6942	microRNA 6942	1.04569736	1.037876205	0.899492338	1.040994419	1.003492829	1.809634363	1.078314528	0	1.00601508	0.97286043	-0.03315465	0.89085888	0.98582319
ENSMUSG00000098796	Gm27163	predicted gene 27163	0	0	0	0	0	1.809634363	0	0	0	0.452408591	0.452408591	0.609425585	0.969741274
ENSMUSG00000098795	Gm27403	predicted gene, 27403	2.66033993	1.037876205	2.819232083	1.040994419	1.003492829	0.875920088	0	2.989701238	1.889610659	1.217278539	-0.67233212	0.612902686	0.969741274
ENSMUSG00000098798	Gm27288	predicted gene, 27288	1.04569736	1.037876205	0.899492338	1.040994419	1.003492829	0.875920088	1.078314528	0.994123999	1.00601508	0.987962861	-0.018052219	0.981393144	0.9978586
ENSMUSG00000065778	Gm22154	predicted gene, 22154	0	0	0	0	0	0	2.115933218	0	0	0.528983305	0.528983305	0.535790408	0.965516704
ENSMUSG00000065773	Rnu1b6	U1b6 small nuclear RNA	0	0	0	0	0	0	1.078314528	0	0	0.269578632	0.269578632	0.846512451	0.973353259
ENSMUSG00000089039	Gm22165	predicted gene, 22165	1.04569736	0	0	0	0	0	0	0	0.26142434	0	-0.26142434	0.830018289	0.973353259
ENSMUSG00000057181	5730455P16Rik	RIKEN cDNA 5730455P16 gene	10.9748791	10.84292594	11.11403394	10.90736128	10.94655289	11.02971212	10.94530453	11.05700775	10.95980006	10.99464433	0.034844262	0.696931207	0.96988229
ENSMUSG00000106061	Gm43773	predicted gene 43773	0	2.05644782	0	0	0	0	0	0.994123999	0.514111955	0.248531	-0.265580955	0.687107012	0.969741274
ENSMUSG00000106060	Gm42488	predicted gene 42488	2.068014459	0	0	0	2.005236078	2.587621499	0	0	0.517003615	1.148214394	0.631210779	0.527814413	0.965516704
ENSMUSG00000106063	C030032O16Rik	RIKEN cDNA C030032O16 gene	0	0	0	0	0	1.809634363	0	0	0	0.452408591	0.452408591	0.609425585	0.969741274
ENSMUSG00000106062	Gm43820	predicted gene 43820	0	0	0	0	2.005236078	0	0	0	0	0.50130902	0.50130902	0.561529182	0.965516704
ENSMUSG00000106067	Gm7902	predicted gene 7902	5.373155087	5.465364584	6.134072159	5.538499508	5.679266081	5.766897212	5.358130323	5.447924293	5.627772834	5.563054477	-0.064718357	0.730852471	0.973353259
ENSMUSG00000061461	Smim20	small integral membrane protein 20	7.197883714	8.156663494	7.879742295	8.052086333	8.621669311	8.167247981	8.465023395	8.112387659	7.821593959	8.341582086	0.519988127	0.013194068	0.161053409
ENSMUSG00000061462	Obscn	obscurin, cytoskeletal calmodulin and titin-interacting RhoGEF	7.959983427	7.508990306	7.858380949	7.881403335	7.245335866	8.040267397	7.635602462	7.480142752	7.802189504	7.600337119	-0.201852385	0.331432516	0.876000026
ENSMUSG00000093919	Gm20760	predicted gene, 20760	0	0	0	1.040994419	0	0	0	0	0.260248605	0	-0.260248605	0.830018289	0.973353259
ENSMUSG00000093910	Zfp853	zinc finger protein 853	7.356211507	7.760930107	7.506768352	7.731516522	7.12586822	7.469418629	8.003717919	8.183021176	7.588856622	7.695506486	0.106649864	0.475509199	0.962049416
ENSMUSG00000093912	Mir3470b	microRNA 3470b	0	1.635246308	0	0	1.003492829	0	0	0	0.408811577	0.250873207	-0.15793837	0.816860842	0.973353259
ENSMUSG00000016528	Mapkapk2	MAP kinase-activated protein kinase 2	9.810987404	10.10400089	10.13924835	10.14012685	9.92583327	9.726278498	10.00262581	9.954020076	10.04859087	9.902189414	-0.146401459	0.150779854	0.632110973
ENSMUSG00000016529	Il10	interleukin 10	2.068014459	0	0	0	0	1.809634363	0	0	0.517003615	0.452408591	-0.064595024	0.923833111	0.997252381
ENSMUSG00000016526	Dyrk3	dual-specificity tyrosine-(Y)-phosphorylation regulated kinase 3	8.398055378	8.722060075	8.743192714	8.230326308	8.051344977	7.241573845	7.509264656	7.363334627	8.523408619	7.541379526	-0.982029093	3.87E-07	6.12E-05
ENSMUSG00000016520	Lnx2	ligand of numb-protein X 2	7.844475132	7.590084943	7.606232848	7.794727119	8.141378773	7.906054428	7.766566731	8.005077907	7.708880011	7.95476946	0.245889449	0.069526274	0.435665224
ENSMUSG00000081221	Gm14760	predicted gene 14760	9.325861091	9.604115335	9.820956715	9.669468601	9.731482849	9.734788346	9.595331297	9.25736981	9.605100435	9.579743075	-0.02535736	0.858637995	0.975363872
ENSMUSG00000081223	Gm12247	predicted gene 12247	0	0	0	0	0	2.37180711	0	0	0	0.592951777	0.592951777	0.466685004	0.957642267
ENSMUSG00000081225	Cyp2j12	cytochrome P450, family 2, subfamily j, polypeptide 12	5.480230314	6.263609283	4.96759891	4.985123232	6.433161041	5.603037346	5.358130323	6.480208437	5.424140435	5.968634287	0.544493852	0.138934198	0.609263641
ENSMUSG00000081227	Gm13082	predicted gene 13082	0	0	2.157573411	1.040994419	2.590779194	1.809634363	0	0	0.799641957	1.100103389	0.300461432	0.705196347	0.96988229
ENSMUSG00000081226	Gm8802	predicted gene 8802	0	0	0	1.639366891	1.003492829	0.875920088	0	0	0.409841723	0.469853229	0.060011506	0.968286808	0.9978586
ENSMUSG00000081228	Gm16089	predicted gene 16089	3.403168963	4.157952906	3.80541029	3.070993449	3.328209112	3.757841642	3.30634127	2.989701238	3.609381402	3.345523316	-0.263858087	0.541142221	0.965516704
ENSMUSG00000085933	Tmem61	transmembrane protein 61	3.250190284	3.06564474	0	3.982495002	2.813337462	2.775313294	3.841853679	3.796423229	2.574582506	3.306731916	0.73214941	0.675845767	0.969741274
ENSMUSG00000085936	2610307P16Rik	RIKEN cDNA 2610307P16 gene	0	3.236588011	0	0	3.006106913	1.417032207	2.445268757	3.159462173	0.809147003	2.506967513	1.69782051	0.304263042	0.852880135
ENSMUSG00000053600	Zfp472	zinc finger protein 472	5.921350221	6.161174106	6.437552955	6.603563095	7.062207324	6.661370141	6.906141978	6.833816833	6.280910094	6.865884069	0.584973975	0.005593808	0.092948645
ENSMUSG00000053603	4930442H23Rik	RIKEN cDNA 4930442H23 gene	0	0	0	0	1.003492829	0	2.115933218	0	0	0.779856512	0.779856512	0.462254064	0.956861716
ENSMUSG00000053604	Rpia	ribose 5-phosphate isomerase A	7.490354704	8.017001623	8.162819902	7.981393855	7.943586752	7.823355072	7.736803988	7.883091411	7.912892521	7.846709306	-0.066183215	0.578351357	0.969741274
ENSMUSG00000083579	Gm15538	predicted gene 15538	3.991054272	3.236588011	2.986096998	3.659250993	2.813337462	2.117931851	1.688464829	2.312514971	3.468247569	2.233062278	-1.235185291	0.031188378	0.277384513
ENSMUSG00000046101	Mcmdc2	minichromosome maintenance domain containing 2	6.64365203	5.773820934	6.466078181	6.419734999	6.235703105	6.80836817	6.674583019	6.769691169	6.325821536	6.622086366	0.29626483	0.22432027	0.752290713
ENSMUSG00000105452	Gm5276	predicted gene 5276	0	0	0	2.061062922	1.003492829	0	0	0	0.51526573	0.250873207	-0.264392523	0.685939718	0.969741274
ENSMUSG00000036138	Acaa1a	acetyl-Coenzyme A acyltransferase 1A	10.71838201	11.0584536	10.75807237	11.11630508	10.9963683	11.00119135	10.9215242	11.16938132	10.91280327	11.02211629	0.109313026	0.350464406	0.892945709
ENSMUSG00000099041	Gm28035	predicted gene, 28035	7.922498908	7.703771903	7.79795212	7.950884735	7.029291494	7.378210444	8.3809318	9.266692465	7.843776916	8.013781551	0.170004634	0.383760052	0.915660884
ENSMUSG00000099042	Mir7066	microRNA 7066	1.04569736	1.037876205	0.899492338	1.040994419	1.003492829	0.875920088	1.688464829	0.994123999	1.00601508	1.140500436	0.134485356	0.838075526	0.973353259
ENSMUSG00000099043	Mir7022	microRNA 7022	0	0	0.899492338	1.040994419	1.003492829	1.417032207	1.078314528	1.577122502	0.485121689	1.268990517	0.783868827	0.397887573	0.925901209
ENSMUSG00000110959	AC122426.1	---	0	0	1.846484642	2.061062922	0	2.37180711	0	0	0.976886891	0.592951777	-0.383935113	0.846617302	0.973353259
ENSMUSG00000106990	Gm42547	predicted gene 42547	9.262267887	8.872281147	9.023049257	8.451305917	8.273741165	8.659607176	8.828198815	8.798821936	8.902226052	8.640092273	-0.262133779	0.113000829	0.553840139
ENSMUSG00000107006	Gm43105	predicted gene 43105	0	2.8716894	2.157573411	0	3.006106913	2.37180711	0	0	1.257315703	1.344478506	0.087162803	0.90002292	0.988851134
ENSMUSG00000107008	Gm2762	predicted gene 2762	5.445414159	5.801328139	6.437552955	5.122865449	5.561417974	6.42941791	6.300302066	6.480208437	5.701790176	6.192836597	0.491046421	0.155753715	0.641587117
ENSMUSG00000078307	AI593442	expressed sequence AI593442	13.18900063	12.63892086	12.80113569	13.00528737	12.41530568	12.93586594	12.34824478	12.10131762	12.90858614	12.45018351	-0.458402632	0.007558641	0.11337961
ENSMUSG00000078302	Foxd1	forkhead box D1	5.869764203	6.139784447	5.496202907	5.886806183	6.176805549	5.675553066	6.008078097	6.178210492	5.848139435	6.009661801	0.161522366	0.504494248	0.965516704
ENSMUSG00000078300	Gm2606	predicted pseudogene 2606	8.70079324	8.88197564	9.153739518	8.999556854	9.123308643	9.113450235	8.810448882	8.451781836	8.934016313	8.874747399	-0.059268914	0.783674329	0.973353259
ENSMUSG00000051934	Spats2	spermatogenesis associated, serine-rich 2	10.23966191	10.08454133	10.36430234	10.05375763	9.868056645	10.04302014	9.986908307	9.792368214	10.1855658	9.922588326	-0.262977475	0.008545565	0.123123628
ENSMUSG00000049038	Mterf2	mitochondrial transcription termination factor 2	7.922498908	7.926216918	7.79795212	7.219849659	8.250128235	8.179767928	7.824311216	8.192835192	7.716629401	8.111760643	0.395131241	0.029165922	0.26687199
ENSMUSG00000096638	Ighv2-9	immunoglobulin heavy variable 2-9	5.732101874	4.318870111	4.1944172	4.246406016	5.254721557	5.578032191	5.434280405	5.310447637	4.6229488	5.394370447	0.771421647	0.09753694	0.515801709
ENSMUSG00000032080	Apoa4	apolipoprotein A-IV	7.498869241	4.930249163	0	0	2.005236078	0	2.445268757	5.965691564	3.107279601	2.6040491	-0.503230501	0.535406669	0.965516704
ENSMUSG00000096632	Igkv9-124	immunoglobulin kappa chain variable 9-124	3.250190284	0	1.846484642	1.040994419	0	0	0	2.575155827	1.534417336	0.643788957	-0.890628379	0.457755075	0.956861716
ENSMUSG00000037669	Ldah	lipid droplet associated hydrolase	8.259613631	8.264358356	9.811261664	8.113978937	10.06901685	10.00717343	8.276198078	8.621248947	8.612303147	9.243409325	0.631106178	0.280504246	0.828452766
ENSMUSG00000097328	Tnfsf12	tumor necrosis factor (ligand) superfamily, member 12	7.990493318	7.161710274	7.429206469	7.724319065	7.606854187	7.666139499	7.58638684	7.431235416	7.576432281	7.572653985	-0.003778296	0.858080284	0.975087998
ENSMUSG00000037664	Cdkn1c	cyclin-dependent kinase inhibitor 1C (P57)	6.392667578	7.303116155	7.38507391	7.548017321	6.561492026	6.266809174	7.140139922	7.573248051	7.157218741	6.885422293	-0.271796448	0.39942996	0.925901209
ENSMUSG00000097326	A330048O09Rik	RIKEN cDNA A330048O09 gene	4.894227342	3.769606182	2.986096998	3.982495002	5.176708868	4.65650582	5.102113538	5.158477381	3.908106381	5.023451402	1.115345021	0.015694761	0.180013217
ENSMUSG00000097325	Gm16897	predicted gene, 16897	5.788752591	5.394888389	5.319886162	5.962165776	5.466250643	4.995556428	5.673006494	6.236307054	5.61642323	5.592780155	-0.023643075	0.949871011	0.9978586
ENSMUSG00000097324	Carmn	cardiac mesoderm enhancer-associated non-coding RNA	0	3.653659897	1.846484642	0	2.32751257	2.37180711	0	2.989701238	1.375036135	1.92225523	0.547219095	0.937113139	0.9978586
ENSMUSG00000037660	Gdf7	growth differentiation factor 7	2.884829173	3.769606182	3.61474788	3.242017635	4.650554971	4.212471312	3.459970513	2.575155827	3.377800217	3.724538156	0.346737938	0.331621684	0.876126814
ENSMUSG00000037661	Gpr160	G protein-coupled receptor 160	4.172313377	4.656706109	4.385735942	3.659250993	4.398963161	4.212471312	4.467265589	2.989701238	4.218501605	4.017100325	-0.20140128	0.734440249	0.973353259
ENSMUSG00000097321	1700028E10Rik	RIKEN cDNA 1700028E10 gene	4.545452185	4.463626252	4.1944172	4.324639127	5.561417974	5.032839998	5.102113538	4.942801653	4.382033691	5.159793291	0.7777596	0.011747435	0.149274726
ENSMUSG00000097320	Tmem147os	transmembrane protein 147, opposite strand	8.569527453	8.692983451	8.474995191	8.691679767	8.445749017	8.318329767	8.34192444	8.565683748	8.607296466	8.417921743	-0.189374723	0.095505502	0.509362677
ENSMUSG00000092748	Gm22175	predicted gene, 22175	1.04569736	0	0.899492338	0	1.003492829	1.417032207	1.078314528	0	0.486297424	0.874709891	0.388412467	0.66789365	0.969741274
ENSMUSG00000015476	Prrt1	proline-rich transmembrane protein 1	12.92800173	12.30268493	12.44634934	12.32252514	12.21154689	12.36019169	12.24960731	12.45455748	12.49989029	12.31897584	-0.180914441	0.132760493	0.596183017
ENSMUSG00000092746	Rn7s6	7S RNA 6	0	3.653659897	0	0	4.176515485	0	0	0	0.913414974	1.044128871	0.130713897	0.863718578	0.977320391
ENSMUSG00000092745	Mir5122	microRNA 5122	1.04569736	1.037876205	0.899492338	1.040994419	1.003492829	0.875920088	1.078314528	0.994123999	1.00601508	0.987962861	-0.018052219	0.981393144	0.9978586
ENSMUSG00000111339	AC139579.1	---	2.394364844	2.382061721	0	0	3.006106913	0	2.939114924	2.797267076	1.194106641	2.185622228	0.991515587	0.339762382	0.881381299
ENSMUSG00000096988	A930029G22Rik	RIKEN cDNA A930029G22 gene	5.843262585	5.74577905	5.702080075	5.400817042	5.679266081	5.766897212	6.194794333	5.871067413	5.672984688	5.878006259	0.205021571	0.387350083	0.919477552
ENSMUSG00000096981	Gm16845	predicted gene, 16845	2.66033993	2.8716894	4.752870796	4.885399987	1.58961773	4.557643452	1.688464829	4.44819295	3.792575028	3.07097974	-0.721595288	0.549577611	0.965516704
ENSMUSG00000111336	AC160338.2	---	0	0	0	1.040994419	0	0	0	0	0.260248605	0	-0.260248605	0.830018289	0.973353259
ENSMUSG00000039716	Dock3	dedicator of cyto-kinesis 3	13.22969314	13.53548879	13.5669782	13.42930009	13.33873326	13.41050195	13.27573107	13.21929634	13.44036505	13.31106565	-0.129299399	0.152301377	0.634324105
ENSMUSG00000039717	Ralyl	RALY RNA binding protein-like	9.955631347	9.875601597	10.38592452	9.990667432	10.02795046	9.900275996	9.996359343	10.18422134	10.05195622	10.02720179	-0.024754438	0.76507929	0.973353259
ENSMUSG00000039714	Cplx3	complexin 3	8.685955893	8.802531963	8.34279978	8.347387308	7.094388884	8.735067398	7.427785757	7.889140248	8.544668736	7.786595572	-0.758073164	0.093623427	0.504892685
ENSMUSG00000039715	Wdr34	WD repeat domain 34	9.272235773	9.343791959	9.393514321	9.511194676	9.689963339	9.475199558	9.759740524	9.314671871	9.380184182	9.559893823	0.179709641	0.108662601	0.544080035
ENSMUSG00000039713	Plekhg5	pleckstrin homology domain containing, family G (with RhoGef domain) member 5	11.82509888	11.94165642	11.96767642	12.06774534	11.5285753	11.70240019	11.73280714	11.54233705	11.95054427	11.62652992	-0.324014345	0.00011065	0.005387405
ENSMUSG00000090674	Gm17082	predicted gene 17082	3.250190284	3.769606182	1.846484642	3.659250993	3.006106913	2.941373951	3.598803161	3.159462173	3.131383025	3.17643655	0.045053524	0.866352522	0.977517586
ENSMUSG00000090675	Olfr111	olfactory receptor 111	2.66033993	2.05644782	1.449333651	1.040994419	2.005236078	1.417032207	2.445268757	3.448730115	1.801778955	2.329066789	0.527287834	0.421803578	0.93752711
ENSMUSG00000101096	Gm21524	predicted gene, 21524	0	0	0	0	1.003492829	0	0	0	0	0.250873207	0.250873207	0.846512451	0.973353259
ENSMUSG00000113798	AC122327.4	---	1.04569736	1.037876205	1.846484642	0	1.003492829	0.875920088	0	0	0.982514551	0.469853229	-0.512661322	0.534747173	0.965516704
ENSMUSG00000113790	AC122371.6	---	2.884829173	0	2.157573411	1.639366891	2.813337462	2.37180711	0	2.797267076	1.670442369	1.995602912	0.325160543	0.689194059	0.969741274
ENSMUSG00000113792	AC140376.1	---	0	0	0	0	0	1.809634363	0	1.577122502	0	0.846689216	0.846689216	0.44560131	0.95243028
ENSMUSG00000113794	AC113508.2	---	0	2.382061721	0	0	0	1.809634363	0	0	0.59551543	0.452408591	-0.14310684	0.814203887	0.973353259
ENSMUSG00000115829	---	---	3.250190284	1.635246308	0	2.652653363	2.005236078	1.809634363	0	1.577122502	1.884522489	1.347998236	-0.536524253	0.388918958	0.921046604
ENSMUSG00000023247	Guca2a	guanylate cyclase activator 2a (guanylin)	0	0	0	1.639366891	0	0	0	0	0.409841723	0	-0.409841723	0.662772563	0.969741274
ENSMUSG00000015766	Eps8	epidermal growth factor receptor pathway substrate 8	10.01025441	9.966490389	10.08395534	10.34991904	9.901787675	9.869693008	10.12973213	10.30451477	10.1026548	10.0514319	-0.051222899	0.695402645	0.96988229
ENSMUSG00000067049	Unc93a	unc-93 homolog A (C. elegans)	0	0	0	0	2.005236078	0	0	1.577122502	0	0.895589645	0.895589645	0.399312387	0.925901209
ENSMUSG00000023249	Parp3	poly (ADP-ribose) polymerase family, member 3	7.857775662	7.293462723	7.012128378	6.900339024	6.9611174	7.280844529	6.879149609	7.22670701	7.265926447	7.086954637	-0.17897181	0.32932277	0.873741402
ENSMUSG00000019433	Gipc1	GIPC PDZ domain containing family, member 1	10.45406005	10.85855882	11.12804812	11.02112967	10.91986295	10.79828106	10.84163256	10.69645276	10.86544916	10.81405734	-0.051391828	0.583944236	0.969741274
ENSMUSG00000115793	---	---	0	2.64754811	2.41333609	2.061062922	0	0	0	0	1.78048678	0	-1.78048678	0.029991961	0.271039626
ENSMUSG00000115795	---	---	0	0	1.846484642	0	0	0	0	0	0.46162116	0	-0.46162116	0.592102664	0.969741274
ENSMUSG00000115798	---	---	5.21677981	5.465364584	6.116184809	5.986435555	5.466250643	6.029203605	5.148063665	4.796001121	5.696191189	5.359879758	-0.336311431	0.34670894	0.889912301
ENSMUSG00000073207	Ccdc160	coiled-coil domain containing 160	5.297085122	5.026626884	5.350809624	5.471300104	5.254721557	6.118621465	5.235793501	5.414763677	5.286455434	5.50597505	0.219519616	0.358626384	0.90051559
ENSMUSG00000056043	Rgs9bp	regulator of G-protein signalling 9 binding protein	3.079044871	3.389405204	3.135647341	4.075933197	2.813337462	3.567705506	3.949570471	2.575155827	3.420007653	3.226442317	-0.193565336	0.780958347	0.973353259
ENSMUSG00000112449	Srp54a	signal recognition particle 54A	10.69634084	10.682067	10.93174491	10.23939698	10.44887892	10.72186389	10.67507896	10.53512633	10.63738743	10.59523702	-0.042150406	0.654949674	0.969741274
ENSMUSG00000112444	AC153548.3	---	0	0	0.899492338	0	0	0.875920088	0	0	0.224873085	0.218980022	-0.005893063	0.991579818	0.9978586
ENSMUSG00000112440	AC155941.1	---	1.04569736	0	0	0	0	0	0	0	0.26142434	0	-0.26142434	0.830018289	0.973353259
ENSMUSG00000112441	AC122860.2	---	5.33562142	4.393062975	3.80541029	4.398847215	5.679266081	5.20604375	4.605430475	3.895902629	4.483235475	4.846660734	0.363425258	0.352912934	0.894555786
ENSMUSG00000031543	Ank1	ankyrin 1, erythroid	11.22630317	11.3047735	11.29038153	11.64354952	11.05614181	11.22507804	10.70612881	11.07966477	11.36625193	11.01675336	-0.349498571	0.005733876	0.094484111
ENSMUSG00000050323	Ndufaf6	NADH dehydrogenase (ubiquinone) complex I, assembly factor 6	6.830642994	7.074213928	6.574852807	6.571835231	6.591867218	6.484281227	6.705643439	6.769691169	6.76288624	6.637870763	-0.125015477	0.471052077	0.95999765
ENSMUSG00000000440	Pparg	peroxisome proliferator activated receptor gamma	7.515749029	7.140328622	7.260327423	7.717085519	6.273673366	6.612951935	7.046196285	7.065127148	7.408372648	6.749487184	-0.658885465	0.002530572	0.054214846
ENSMUSG00000050321	Neto1	neuropilin (NRP) and tolloid (TLL)-like 1	12.21473959	11.96844499	12.14849966	11.68908572	11.96189876	12.24576824	12.08956486	11.88909387	12.00519249	12.04658143	0.041388945	0.781356191	0.973353259
ENSMUSG00000055134	9130017K11Rik	RIKEN cDNA 9130017K11 gene	4.47814862	5.026626884	6.23697497	4.662538529	4.864718185	4.212471312	5.148063665	5.543064376	5.10107225	4.942079384	-0.158992866	0.518688737	0.965516704
ENSMUSG00000031546	Gins4	GINS complex subunit 4 (Sld5 homolog)	7.928814353	8.33193306	8.295898503	8.299760719	8.216407074	8.20856541	8.38573439	8.132923991	8.214101659	8.235907716	0.021806057	0.915881467	0.995482655
ENSMUSG00000031545	Gpat4	glycerol-3-phosphate acyltransferase 4	11.30609447	11.50990642	11.66457416	11.46722814	11.48220156	11.48086305	11.35710565	11.19157698	11.4869508	11.37793681	-0.109013987	0.27188447	0.816651198
ENSMUSG00000055137	Sugct	succinyl-CoA glutarate-CoA transferase	5.99542741	6.533386621	5.860888931	6.454947835	6.650763807	5.675553066	6.472712789	6.870967218	6.211162699	6.41749922	0.206336521	0.381612468	0.91483815
ENSMUSG00000055138	Gm4861	predicted gene 4861	1.645576219	0	0	1.639366891	0	1.417032207	0	0	0.821235778	0.354258052	-0.466977726	0.663351079	0.969741274
ENSMUSG00000031549	Ido2	indoleamine 2,3-dioxygenase 2	5.81626502	5.242682586	5.319886162	5.364240691	5.83974512	4.877550687	5.850248223	5.688891056	5.435768615	5.564108771	0.128340157	0.59615113	0.969741274
ENSMUSG00000031548	Sfrp1	secreted frizzled-related protein 1	8.323321392	8.652021436	8.063643761	7.919716464	9.301586888	7.503018491	8.63600711	9.083642606	8.239675763	8.631063774	0.39138801	0.20464666	0.723095898
ENSMUSG00000003402	Prkcsh	protein kinase C substrate 80K-H	11.0550107	10.94202313	11.01494705	11.09204525	11.16873593	11.20786189	11.06391267	11.00085423	11.02600653	11.11034118	0.084334648	0.264243278	0.805986185
ENSMUSG00000097589	Dleu2	deleted in lymphocytic leukemia, 2	7.573319894	7.414183469	7.879742295	8.319000433	7.104958499	7.974721068	7.370792228	7.550528952	7.796561523	7.500250187	-0.296311336	0.184401481	0.691121489
ENSMUSG00000106843	Gm42458	predicted gene 42458	1.645576219	0	0	0	0	0	1.688464829	0	0.411394055	0.422116207	0.010722153	0.998195122	0.999352877
ENSMUSG00000106841	Gm42656	predicted gene 42656	5.131739574	6.203024925	6.186440836	6.365249852	4.398963161	4.002991028	5.541461475	5.346064338	5.971613797	4.822370001	-1.149243796	0.003385873	0.065740312
ENSMUSG00000097580	Gm5432	predicted gene 5432	2.068014459	0	2.41333609	2.061062922	3.006106913	2.37180711	2.115933218	1.991176999	1.635603368	2.37125606	0.735652692	0.461437447	0.956861716
ENSMUSG00000097587	4930578M01Rik	RIKEN cDNA 4930578M01 gene	6.548431474	6.182251265	6.269707052	6.308625971	6.72115645	6.56285217	6.7950033	7.107250103	6.327253941	6.796565506	0.469311565	0.015541961	0.178645798
ENSMUSG00000097585	E230029C05Rik	RIKEN cDNA E230029C05 gene	5.732101874	5.499352317	5.817270352	6.10201367	6.235703105	5.78885735	5.673006494	5.919155131	5.787684553	5.90418052	0.116495967	0.630611864	0.969741274
ENSMUSG00000097584	1700125G22Rik	RIKEN cDNA 1700125G22 gene	0	0	0	0	0	0	2.445268757	0	0	0.611317189	0.611317189	0.456371897	0.956861716
ENSMUSG00000062175	Tgif2	TGFB-induced factor homeobox 2	5.788752591	5.499352317	5.082598685	6.327748599	6.650763807	1.809634363	6.674583019	6.858689744	5.674613048	5.498417733	-0.176195315	0.508037495	0.965516704
ENSMUSG00000091989	Ndufab1-ps	NADH dehydrogenase (ubiquinone) 1, alpha/beta subcomplex 1, pseudogene	3.403168963	2.05644782	3.509051426	4.163686085	4.398963161	3.757841642	3.841853679	3.574171483	3.283088574	3.893207491	0.610118917	0.348316045	0.890988547
ENSMUSG00000025979	Mob4	MOB family member 4, phocein	10.46496532	9.785502866	9.511109749	9.133276049	10.51377588	9.888883215	10.7616819	9.542828542	9.723713496	10.17679238	0.453078887	0.262953674	0.803896301
ENSMUSG00000025978	Rftn2	raftlin family member 2	10.02948196	9.729329007	9.485212707	9.786394303	9.894190489	9.68442474	9.821302949	10.29315498	9.757604493	9.92326829	0.165663797	0.243363177	0.778307609
ENSMUSG00000025977	Boll	bol, boule-like (Drosophila)	0	2.64754811	0	0	1.003492829	0	0	0	0.661887028	0.250873207	-0.41101382	0.485807027	0.964963304
ENSMUSG00000030209	Grin2b	glutamate receptor, ionotropic, NMDA2B (epsilon 2)	13.46882011	13.72560511	13.80269564	13.40333995	13.48422894	13.60271542	13.44115913	13.45926509	13.6001152	13.49684215	-0.103273056	0.28382803	0.832777896
ENSMUSG00000091983	Olfr457	olfactory receptor 457	0	2.05644782	0	0	0	0	0	1.991176999	0.514111955	0.49779425	-0.016317705	0.979627529	0.9978586
ENSMUSG00000021087	Rtn1	reticulon 1	14.04853882	14.33341932	14.61223985	14.68656393	14.31367943	14.54409505	14.36067013	13.9949014	14.42019048	14.3033365	-0.11685398	0.413876099	0.932448129
ENSMUSG00000021086	Ccdc175	coiled-coil domain containing 175	1.645576219	2.05644782	0	2.061062922	0	0	0	0	1.44077174	0	-1.44077174	0.113503132	0.555081965
ENSMUSG00000099757	BE692007	expressed sequence BE692007	0	0	4.96759891	3.533121572	3.006106913	3.66590362	3.459970513	4.942801653	2.125180121	3.768695675	1.643515554	0.730059937	0.973353259
ENSMUSG00000022191	Drosha	drosha, ribonuclease type III	12.02918125	11.8292323	12.13468369	11.8958172	11.93327143	12.01225989	12.00235266	11.98540634	11.97222861	11.98332258	0.011093968	0.939273286	0.9978586
ENSMUSG00000022193	Psmb5	proteasome (prosome, macropain) subunit, beta type 5	10.23457276	10.83629265	10.93875865	10.78038126	10.76269535	10.73181748	10.69939353	10.23378641	10.69750133	10.60692319	-0.090578134	0.518773991	0.965516704
ENSMUSG00000022194	Pabpn1	poly(A) binding protein, nuclear 1	11.60910665	11.52854248	11.49326179	11.82860662	11.84657281	11.68017472	11.7950536	11.93513324	11.61487938	11.81423359	0.199354206	0.039631025	0.319047244
ENSMUSG00000022195	6030458C11Rik	RIKEN cDNA 6030458C11 gene	10.39484429	10.14885726	10.38312255	9.368442651	10.45715249	9.599997033	9.72983515	10.39230983	10.07381669	10.04482363	-0.028993059	0.914367431	0.994873654
ENSMUSG00000022197	Pdzd2	PDZ domain containing 2	12.19457053	11.8841293	11.93552524	12.1121939	11.75851926	11.81837246	11.60117663	11.65445161	12.03160474	11.70812999	-0.323474755	0.000428147	0.015001776
ENSMUSG00000022199	Slc22a17	solute carrier family 22 (organic cation transporter), member 17	13.24163283	13.54403721	13.70276771	13.43963714	13.70947409	13.60976867	13.73402004	13.38790353	13.48201872	13.61029158	0.128272858	0.279786732	0.827410278
ENSMUSG00000093167	Mir5131	microRNA 5131	1.04569736	1.037876205	0.899492338	1.040994419	1.003492829	0.875920088	1.078314528	0.994123999	1.00601508	0.987962861	-0.018052219	0.981393144	0.9978586
ENSMUSG00000090588	Gm9573	predicted gene 9573	2.068014459	2.05644782	3.135647341	2.386971434	2.32751257	1.809634363	0	2.989701238	2.411770264	1.781712043	-0.630058221	0.626584457	0.969741274
ENSMUSG00000090589	Gm17180	predicted gene 17180	3.667665513	3.976807249	2.819232083	3.070993449	3.006106913	4.451504748	3.725440712	2.575155827	3.383674574	3.43955205	0.055877476	0.740976141	0.973353259
ENSMUSG00000105577	Gm34599	predicted gene, 34599	0	0	0	1.639366891	1.003492829	0	0	0	0.409841723	0.250873207	-0.158968516	0.816860842	0.973353259
ENSMUSG00000105574	Gm43648	predicted gene 43648	0	0	0	2.061062922	0	0	0	0	0.51526573	0	-0.51526573	0.540781741	0.965516704
ENSMUSG00000105572	Gm43300	predicted gene 43300	6.088627781	6.139784447	5.677895745	6.506206227	5.707283082	5.552585985	5.931320395	6.603054461	6.10312855	5.948560981	-0.154567569	0.662346995	0.969741274
ENSMUSG00000105571	Gm43662	predicted gene 43662	1.645576219	3.06564474	0	2.386971434	0	1.809634363	2.115933218	0	1.774548098	0.981391895	-0.793156203	0.392170548	0.923639334
ENSMUSG00000116808	---	---	2.394364844	3.06564474	0	2.876933903	0	1.417032207	1.688464829	0.994123999	2.084235871	1.024905259	-1.059330613	0.13680204	0.605144278
ENSMUSG00000105578	Gm43663	predicted gene 43663	0	0	0	0	0	0.875920088	0	0	0	0.218980022	0.218980022	0.846512451	0.973353259
ENSMUSG00000105579	Gm43251	predicted gene 43251	0	3.06564474	3.973791331	2.876933903	2.005236078	2.775313294	4.392881974	3.159462173	2.479092493	3.08322338	0.604130887	0.679357412	0.969741274
ENSMUSG00000118368	---	---	0	0	0	0	0	0	2.115933218	0	0	0.528983305	0.528983305	0.535790408	0.965516704
ENSMUSG00000110176	Gm35520	predicted gene, 35520	1.04569736	0	0	0	0	0	0	0	0.26142434	0	-0.26142434	0.830018289	0.973353259
ENSMUSG00000059142	Zfp945	zinc finger protein 945	8.203418764	8.602062892	8.28393101	8.916734372	8.40356135	8.785089056	9.016471242	8.688692108	8.50153676	8.723453439	0.221916679	0.22947927	0.758514891
ENSMUSG00000029670	Ing3	inhibitor of growth family, member 3	9.032328759	8.975497736	9.006151596	8.828866061	8.811092673	9.019063668	8.824666256	8.883066571	8.960711038	8.884472292	-0.076238746	0.458055792	0.956861716
ENSMUSG00000029671	Wnt16	wingless-type MMTV integration site family, member 16	3.541470204	5.282265739	4.705805117	5.078396742	4.094030572	3.348651568	4.954769966	4.632553048	4.651984451	4.257501288	-0.394483162	0.347115267	0.890396732
ENSMUSG00000029672	Fam3c	family with sequence similarity 3, member C	10.77381042	10.91079389	11.15567457	10.90497593	11.08912305	10.71757695	11.06840029	10.73054031	10.9363137	10.90141015	-0.034903549	0.789006145	0.973353259
ENSMUSG00000029673	Auts2	autism susceptibility candidate 2	11.32537134	10.90367316	11.05187778	11.00711168	10.73148696	11.25101754	10.9338733	10.91674841	11.07200849	10.95828155	-0.113726935	0.379485348	0.913918903
ENSMUSG00000029674	Limk1	LIM-domain containing, protein kinase	10.49080649	11.27871221	11.37883644	11.22165104	10.86650826	11.10767832	11.07955866	11.13416133	11.09250154	11.04697664	-0.045524902	0.607465458	0.969741274
ENSMUSG00000029675	Eln	elastin	7.953803252	8.03449262	7.520433217	8.710014129	8.310735944	7.930955085	8.423590201	9.101987476	8.054685805	8.441817176	0.387131372	0.133063913	0.596748502
ENSMUSG00000029676	Pot1a	protection of telomeres 1A	8.864579449	8.764604901	8.921138419	8.552309787	8.864943217	8.838707346	8.474071381	8.763038022	8.775658139	8.735189992	-0.040468147	0.761398975	0.973353259
ENSMUSG00000038145	Snrk	SNF related kinase	10.16806169	9.373875735	9.521339791	11.52636011	9.544186256	9.503695769	11.07436216	9.637494869	10.14740933	9.939934764	-0.207474568	0.619718854	0.969741274
ENSMUSG00000038146	Notch3	notch 3	9.351944336	9.494637184	9.52980976	9.83398172	9.775153566	9.734788346	9.866668989	9.766314563	9.55259325	9.785731366	0.233138116	0.043917976	0.336581462
ENSMUSG00000038147	Cd84	CD84 antigen	6.27862055	6.182251265	6.116184809	6.346621072	5.913751808	6.065638454	6.05707106	6.930834601	6.230919424	6.24182398	0.010904556	0.782217873	0.973353259
ENSMUSG00000038141	Tmem181a	transmembrane protein 181A	11.36141932	11.52854248	11.61925617	11.55250362	11.3732968	11.59549048	11.47108198	11.12329717	11.51543039	11.39079161	-0.124638789	0.273318826	0.818418098
ENSMUSG00000038143	Stox2	storkhead box 2	12.17643952	12.2593332	12.25399682	12.26633413	11.95826018	12.05875435	12.10238597	12.37597427	12.23902592	12.12384369	-0.115182223	0.260234104	0.799664076
ENSMUSG00000072847	A530017D24Rik	RIKEN cDNA A530017D24 gene	9.434153269	8.747030109	9.001287116	8.76014439	8.490773558	8.735067398	8.927052288	7.695639673	8.985653721	8.462133229	-0.523520492	0.032033474	0.2816052
ENSMUSG00000072845	Tmprss11a	transmembrane protease, serine 11a	2.66033993	0	0	1.639366891	3.465775941	2.587621499	0	0	1.074926705	1.51334936	0.438422655	0.518081591	0.965516704
ENSMUSG00000072844	G530011O06Rik	RIKEN cDNA G530011O06 gene	6.718466702	4.463626252	4.657152062	5.538499508	6.364444342	6.101175771	6.172734221	4.512299928	5.344436131	5.787663566	0.443227435	0.51644551	0.965516704
ENSMUSG00000072849	Serpina1e	serine (or cysteine) peptidase inhibitor, clade A, member 1E	4.47814862	3.769606182	0	0	0	0	0	2.575155827	2.0619387	0.643788957	-1.418149744	0.392734292	0.924347093
ENSMUSG00000028108	Ecm1	extracellular matrix protein 1	8.002518876	8.203806115	8.149690696	8.168029812	8.412098154	7.746887769	8.179946956	8.153172092	8.131011375	8.123026243	-0.007985132	0.965665717	0.9978586
ENSMUSG00000025359	Pmel	premelanosome protein	2.884829173	3.389405204	4.444258039	3.982495002	4.650554971	3.925812223	3.30634127	3.574171483	3.675246854	3.864219987	0.188973132	0.751055209	0.973353259
ENSMUSG00000025358	Cdk2	cyclin-dependent kinase 2	6.803405985	6.377641345	6.363670276	6.365249852	6.029237949	6.510949831	7.058279266	6.954102842	6.477491865	6.638142472	0.160650608	0.410633363	0.930137093
ENSMUSG00000028101	Pias3	protein inhibitor of activated STAT 3	9.368300551	9.458378591	9.444578463	9.627645422	9.125905777	9.064780455	9.202171177	9.380558985	9.474725757	9.193354099	-0.281371658	0.007597155	0.113588351
ENSMUSG00000028100	Nudt17	nudix (nucleoside diphosphate linked moiety X)-type motif 17	6.87055797	7.193200075	7.185107144	7.429101757	7.337850868	7.159672359	6.674583019	7.043595303	7.169491736	7.053925387	-0.115566349	0.573134951	0.969741274
ENSMUSG00000025351	Cd63	CD63 antigen	9.567627488	10.12864072	9.657428529	10.21135651	10.39928947	9.869693008	10.08022515	10.19768732	9.891263311	10.13672374	0.245460426	0.143883801	0.619084169
ENSMUSG00000028102	Pex11b	peroxisomal biogenesis factor 11 beta	8.670964364	9.037533351	8.786248108	8.639068214	9.399284288	8.776871629	8.845733016	8.769610553	8.783453509	8.947874872	0.164421362	0.256790243	0.794422231
ENSMUSG00000025357	Dgka	diacylglycerol kinase, alpha	8.776280345	8.453942898	8.553522919	8.767165749	8.120694261	8.355591779	8.75584992	8.858613951	8.637727978	8.522687478	-0.1150405	0.578063394	0.969741274
ENSMUSG00000028104	Polr3gl	polymerase (RNA) III (DNA directed) polypeptide G like	8.786748875	8.725653792	8.751907201	8.442560839	8.791596285	8.495702218	9.041033592	8.965527351	8.676717677	8.823464861	0.146747185	0.274393901	0.820098627
ENSMUSG00000028107	Tars2	threonyl-tRNA synthetase 2, mitochondrial (putative)	9.67107827	9.885273878	9.701581094	9.78812116	10.03625779	9.860649467	10.0533112	9.984002699	9.761513601	9.983555289	0.222041688	0.012320501	0.154385759
ENSMUSG00000025354	Dnajc14	DnaJ heat shock protein family (Hsp40) member C14	10.5817841	10.15153152	10.16883402	10.62576789	10.33900837	9.879959541	10.48899043	10.5862841	10.38197938	10.32356061	-0.058418769	0.743414536	0.973353259
ENSMUSG00000109095	Gm44799	predicted gene 44799	3.991054272	1.635246308	0	0	2.813337462	2.941373951	3.459970513	3.796423229	1.406575145	3.252776289	1.846201144	0.290524122	0.839748371
ENSMUSG00000109094	Gm44587	predicted gene 44587	0	0	0	0	2.590779194	1.809634363	0	2.312514971	0	1.678232132	1.678232132	0.045536704	0.343137769
ENSMUSG00000109097	Gm29683	predicted gene, 29683	2.068014459	3.389405204	0	0	2.813337462	2.775313294	3.725440712	2.575155827	1.364354916	2.972311824	1.607956908	0.229413026	0.758374461
ENSMUSG00000062825	Actg1	actin, gamma, cytoplasmic 1	13.96841994	13.94543223	14.12559925	13.6783204	14.01444214	14.25531338	14.14091661	14.11565478	13.92944295	14.13158173	0.202138773	0.06589813	0.422765539
ENSMUSG00000062822	4833420G17Rik	RIKEN cDNA 4833420G17 gene	9.866325137	9.663403387	9.678912319	10.05662597	9.984250241	9.685888369	10.01662663	9.984002699	9.816316703	9.917691986	0.101375283	0.403444356	0.925901209
ENSMUSG00000111496	AC153912.4	---	7.187386724	6.613158363	6.675998045	6.419734999	6.889561285	6.251075793	6.932638589	6.98831634	6.724069532	6.765398002	0.041328469	0.870187564	0.979110545
ENSMUSG00000114469	AC152162.1	---	8.106462992	8.466883908	8.255614641	8.102921439	8.470481878	7.935884055	8.548770902	8.873945338	8.232970745	8.457270543	0.224299798	0.164246655	0.657976056
ENSMUSG00000111490	AC134248.1	---	2.068014459	2.64754811	1.449333651	0	0	2.37180711	0	1.991176999	1.541224055	1.090746027	-0.450478028	0.744087166	0.973353259
ENSMUSG00000111491	AC135669.2	---	0	0	0	2.061062922	0	0	0	0	0.51526573	0	-0.51526573	0.540781741	0.965516704
ENSMUSG00000049957	Ccdc137	coiled-coil domain containing 137	8.499125905	8.534007965	8.369470863	9.44048596	9.181890863	8.629499592	9.574449534	8.132923991	8.710772673	8.879690995	0.168918322	0.609657544	0.969741274
ENSMUSG00000042148	Cox10	cytochrome c oxidase assembly protein 10	9.599646912	9.39659762	9.607087094	9.238065308	9.424819562	9.599997033	9.703149568	9.209830894	9.460349233	9.484449264	0.024100031	0.834015273	0.973353259
ENSMUSG00000052214	Opa3	optic atrophy 3	10.94637006	10.79840125	10.84412848	10.82900322	10.68028204	10.87278235	10.73087385	10.72547824	10.85447575	10.75235412	-0.102121633	0.186379174	0.693867885
ENSMUSG00000106676	Gm42895	predicted gene 42895	2.394364844	0	0	0	0	0	0	0	0.598591211	0	-0.598591211	0.459910967	0.956861716
ENSMUSG00000085811	Cep112it	centrosomal protein 112, intronic transcript	3.403168963	2.05644782	1.846484642	2.061062922	2.590779194	0	2.939114924	2.989701238	2.341791087	2.129898839	-0.211892248	0.998876576	0.999534976
ENSMUSG00000087644	Gm14703	predicted gene 14703	6.934722809	6.359250981	6.735792305	7.135547185	7.115451241	6.386856338	7.15146415	7.580742268	6.79132832	7.058628499	0.267300179	0.238060854	0.77137052
ENSMUSG00000087646	Gm1667	predicted gene 1667	0	0	1.449333651	0	0	0	0	0	0.362333413	0	-0.362333413	0.692015925	0.969741274
ENSMUSG00000103065	Gm20236	predicted gene, 20236	0	1.037876205	0	0	1.58961773	0	0	0	0.259469051	0.397404432	0.137935381	0.833734401	0.973353259
ENSMUSG00000113704	AC107681.2	---	0	0	0	0	2.005236078	0	0	0	0	0.50130902	0.50130902	0.561529182	0.965516704
ENSMUSG00000109232	Gm44577	predicted gene 44577	1.04569736	0	2.41333609	0	0	0	1.688464829	0	0.864758362	0.422116207	-0.442642155	0.575399081	0.969741274
ENSMUSG00000052681	Rap1b	RAS related protein 1b	11.20434529	10.75245855	11.09817473	10.78989293	10.6793983	10.9642765	11.24131762	11.04079758	10.96121788	10.9814475	0.020229626	0.878638615	0.981512188
ENSMUSG00000097610	A930012L18Rik	RIKEN cDNA A930012L18 gene	6.564744433	5.880836339	6.423076014	6.649883754	6.094337702	5.852800675	6.104454754	6.588258703	6.379635135	6.159962959	-0.219672177	0.352722929	0.894555786
ENSMUSG00000071303	Rps8-ps1	ribosomal protein S8, pseudogene 1	3.250190284	2.382061721	3.61474788	2.386971434	3.006106913	3.090278098	3.134381001	2.989701238	2.90849283	3.055116813	0.146623983	0.951649836	0.9978586
ENSMUSG00000071302	2610044O15Rik8	RIKEN cDNA 2610044O15 gene	8.919522567	8.621482987	8.707798636	8.835561561	8.416347687	8.60185487	8.35667607	8.476096937	8.771091438	8.462743891	-0.308347547	0.006839231	0.105820778
ENSMUSG00000068706	Gm10250	predicted pseudogene 10250	7.754897674	7.86887095	7.769624806	7.531617804	7.931761083	7.567957997	7.95284628	7.789176889	7.731252809	7.810435562	0.079182754	0.584961809	0.969741274
ENSMUSG00000105231	Iglj3	immunoglobulin lambda joining 3	5.547439061	3.389405204	4.261049233	2.386971434	2.590779194	1.809634363	1.688464829	3.689572954	3.896216233	2.444612835	-1.451603398	0.01495663	0.174551574
ENSMUSG00000019880	Rspo3	R-spondin 3	8.393496225	8.140600633	8.369470863	8.402538437	7.864928216	8.150383894	8.346858428	8.207432165	8.326526539	8.142400676	-0.184125863	0.182212493	0.687740664
ENSMUSG00000019883	Echdc1	enoyl Coenzyme A hydratase domain containing 1	8.871153008	8.872281147	8.704809557	8.548239497	8.264342319	8.940312277	8.969258383	8.798821936	8.749120802	8.743183729	-0.005937073	0.92668232	0.9978586
ENSMUSG00000096553	Gm10097	predicted gene 10097	2.66033993	0	0	2.061062922	0	0	0	0	1.180350713	0	-1.180350713	0.175338507	0.677071524
ENSMUSG00000019888	Mgat4c	MGAT4 family, member C	7.259310611	7.172283428	7.132689142	6.938159062	7.48267155	7.636169353	8.082739628	7.802057709	7.125610561	7.75090956	0.625298999	0.00015116	0.006932511
ENSMUSG00000019889	Ptprk	protein tyrosine phosphatase, receptor type, K	11.5067572	11.47616934	11.68557359	11.56716093	11.09973118	11.31956478	11.29144337	11.53174314	11.55891527	11.31062062	-0.248294649	0.015093426	0.175129825
ENSMUSG00000053161	Daw1	dynein assembly factor with WDR repeat domains 1	2.66033993	2.382061721	0	0	1.58961773	2.117931851	0	2.989701238	1.260600413	1.674312705	0.413712292	0.778009418	0.973353259
ENSMUSG00000088442	Gm23553	predicted gene, 23553	0	0	0	0	0	0	1.078314528	0	0	0.269578632	0.269578632	0.846512451	0.973353259
ENSMUSG00000053164	Gpr21	G protein-coupled receptor 21	6.336770718	6.516888973	4.885501747	6.723925744	7.216383558	7.413976133	6.879149609	5.846408813	6.115771795	6.838979528	0.723207733	0.060227136	0.402776072
ENSMUSG00000053166	Cdh22	cadherin 22	10.97029411	11.08457667	11.40669613	11.11836563	10.80787322	11.04347842	10.99722289	10.69559017	11.14498314	10.88604117	-0.258941963	0.022508334	0.226044761
ENSMUSG00000083412	Gm12268	predicted gene 12268	2.068014459	1.635246308	0	1.639366891	0	1.417032207	0	0	1.335656915	0.354258052	-0.981398863	0.334635888	0.878058161
ENSMUSG00000018287	Spag7	sperm associated antigen 7	9.145110023	9.586436219	9.363502246	9.548350572	9.591930661	9.629199354	9.390760846	9.2897389	9.410849765	9.47540744	0.064557675	0.618856543	0.969741274
ENSMUSG00000018286	Psmb6	proteasome (prosome, macropain) subunit, beta type 6	9.955631347	10.28661025	10.16231166	10.33227399	10.61059909	10.37967501	10.05783187	10.24208114	10.18420681	10.32254678	0.138339966	0.253799882	0.791435528
ENSMUSG00000024758	Rtn3	reticulon 3	14.89381695	14.97861581	15.22478449	14.85579473	14.69128727	14.90820881	14.83991138	14.69655393	14.988253	14.78399035	-0.20426265	0.053872951	0.377741521
ENSMUSG00000024759	Atl3	atlastin GTPase 3	10.15195611	10.4112336	10.34331253	10.55044245	10.46024289	10.37695925	10.28432376	10.46092313	10.36423617	10.39561226	0.031376087	0.789458489	0.973353259
ENSMUSG00000021508	Cxcl14	chemokine (C-X-C motif) ligand 14	11.62912108	11.43998462	11.44884271	11.86055308	11.67851616	11.57430974	11.73657164	11.6015568	11.59462537	11.64773858	0.053113209	0.668486267	0.969741274
ENSMUSG00000083413	Vmn1r-ps110	vomeronasal 1 receptor, pseudogene 110	0	0	0	0	0	0	3.725440712	2.312514971	0	1.509488921	1.509488921	0.038914025	0.316225989
ENSMUSG00000117966	---	---	0	1.635246308	0.899492338	2.061062922	2.005236078	2.117931851	0	0	1.148950392	1.030791982	-0.11815841	0.960827637	0.9978586
ENSMUSG00000021500	Ddx46	DEAD (Asp-Glu-Ala-Asp) box polypeptide 46	11.57327307	11.51458805	11.49239535	11.54128408	11.28077001	11.3859031	11.39927687	11.52155769	11.53038514	11.39687692	-0.13350822	0.072589327	0.444902326
ENSMUSG00000021501	Caml	calcium modulating ligand	9.425246885	9.515547704	9.626171576	9.542223997	9.608739053	9.456456298	9.505521264	9.552389076	9.52729754	9.530776423	0.003478883	0.987099236	0.9978586
ENSMUSG00000024754	Tmem2	transmembrane protein 2	8.667192013	9.034638984	8.825305922	8.713653206	8.703927977	8.548146111	8.615709975	8.674753193	8.810197532	8.635634314	-0.174563218	0.111829538	0.551289397
ENSMUSG00000021504	B4galt7	xylosylprotein beta1,4-galactosyltransferase, polypeptide 7 (galactosyltransferase I)	8.996700416	9.164762093	9.188392433	9.135990712	9.233377796	9.17935785	9.169124585	9.168153443	9.121461413	9.187503419	0.066042005	0.476968176	0.96335258
ENSMUSG00000065603	Mir218-1	microRNA 218-1	0	1.635246308	0	1.040994419	0	0	0	0	0.669060182	0	-0.669060182	0.541491226	0.965516704
ENSMUSG00000086118	Gm14169	predicted gene 14169	8.224107402	7.926216918	8.656122343	8.255509662	8.25488184	7.974721068	8.082739628	8.296600297	8.265489081	8.152235708	-0.113253373	0.406592222	0.926825766
ENSMUSG00000086119	Gm2415	predicted gene 2415	9.567627488	9.672741862	9.600669083	10.12926871	9.791604177	10.06343281	9.613869905	9.632094937	9.742576786	9.775250456	0.032673671	0.853861661	0.973949405
ENSMUSG00000086111	Gm15326	predicted gene 15326	0	0	1.846484642	0	0	0	2.445268757	0	0.46162116	0.611317189	0.149696029	0.807492162	0.973353259
ENSMUSG00000036275	9530068E07Rik	RIKEN cDNA 9530068E07 gene	11.15872925	11.06343222	11.17200002	11.03864412	11.18501655	11.2455691	11.08325902	11.23615634	11.1082014	11.18750025	0.079298851	0.273978951	0.819362809
ENSMUSG00000036270	Edc4	enhancer of mRNA decapping 4	11.21019027	11.31494833	11.25147829	11.50971112	11.11419114	11.2063329	11.11974979	11.19218868	11.321582	11.15811563	-0.163466371	0.046790794	0.347906395
ENSMUSG00000036273	Lrrk2	leucine-rich repeat kinase 2	11.37997559	11.24905341	11.27685924	11.37544553	11.12006506	11.41311028	10.88722051	10.41344847	11.32033344	10.95846108	-0.361872365	0.049234202	0.356814083
ENSMUSG00000036278	Macrod1	MACRO domain containing 1	7.447011528	8.011123848	7.573834018	8.135842885	7.748411684	7.462603722	7.659594667	7.660707269	7.791953069	7.632829336	-0.159123734	0.293303097	0.842185413
ENSMUSG00000022972	1110004E09Rik	RIKEN cDNA 1110004E09 gene	9.055601376	9.054778658	9.317280011	8.957205723	9.228552685	9.310385989	9.166336227	8.933691787	9.096216442	9.159741672	0.06352523	0.597664607	0.969741274
ENSMUSG00000022973	Synj1	synaptojanin 1	13.49578982	13.52624561	12.97154351	12.61076132	13.26657268	13.57642292	13.44115913	13.21854591	13.15108507	13.37567516	0.224590094	0.296151915	0.843957605
ENSMUSG00000022971	Ifnar2	interferon (alpha and beta) receptor 2	8.636652759	8.667051623	8.653024139	8.519421318	8.58438783	8.895473327	8.831722745	8.830600071	8.61903746	8.785545993	0.166508533	0.115867798	0.559832138
ENSMUSG00000022974	Paxbp1	PAX3 and PAX7 binding protein 1	11.14251856	10.81536485	10.7355486	10.89218702	10.87579606	10.7942156	10.91489454	11.08691946	10.89640476	10.91795641	0.021551653	0.869082494	0.978505806
ENSMUSG00000022978	Mis18a	MIS18 kinetochore protein A	7.308574469	6.788334674	6.770514345	6.808034541	7.364486786	6.941763687	6.780489089	6.846306891	6.918864507	6.983261613	0.064397106	0.739954036	0.973353259
ENSMUSG00000112021	AC153887.2	---	1.04569736	2.05644782	0	3.394899473	2.005236078	1.809634363	0	2.312514971	1.624261163	1.531846353	-0.09241481	0.687122279	0.969741274
ENSMUSG00000112022	AC157515.1	---	6.446479268	5.854817447	6.023262006	5.834286707	6.072962523	5.972765709	6.379482559	6.178210492	6.039711357	6.150855321	0.111143964	0.67776454	0.969741274
ENSMUSG00000112023	Lilr4b	leukocyte immunoglobulin-like receptor, subfamily B, member 4B	4.255061632	3.06564474	3.71322647	3.775234473	4.328557257	4.451504748	4.31445375	4.381104338	3.702291829	4.368905023	0.666613195	0.121582147	0.573588848
ENSMUSG00000027221	Chst1	carbohydrate (keratan sulfate Gal-6) sulfotransferase 1	13.27810742	13.27490797	13.35085047	13.26091216	13.10039399	13.20178838	13.22621858	13.04079341	13.29119451	13.14229859	-0.148895915	0.036804743	0.306258446
ENSMUSG00000041135	Ripk2	receptor (TNFRSF)-interacting serine-threonine kinase 2	8.049643105	7.644255389	7.499887075	7.64268241	7.827125387	7.574294028	7.651641516	7.716200195	7.709116995	7.692315281	-0.016801713	0.858252715	0.975087998
ENSMUSG00000027222	Pex16	peroxisomal biogenesis factor 16	8.434019031	8.812704976	8.737353674	8.798345725	8.864943217	9.084889669	8.806872538	8.40188657	8.695605852	8.789647999	0.094042147	0.477754928	0.963614476
ENSMUSG00000027225	Duoxa2	dual oxidase maturation factor 2	2.068014459	0	0	0	0	0	0	0	0.517003615	0	-0.517003615	0.539180863	0.965516704
ENSMUSG00000027224	Duoxa1	dual oxidase maturation factor 1	0	2.64754811	0	0	0	0	2.115933218	0	0.661887028	0.528983305	-0.132903723	0.805137431	0.973353259
ENSMUSG00000027227	Sord	sorbitol dehydrogenase	9.044011994	8.89480112	9.077216538	8.680566257	8.864943217	9.084889669	8.903803917	8.72971858	8.924148977	8.895838846	-0.028310132	0.803035835	0.973353259
ENSMUSG00000097342	Gm26618	predicted gene, 26618	2.884829173	2.64754811	2.630511888	0	2.32751257	3.22524116	3.134381001	0	2.040722293	2.171783683	0.13106139	0.800490147	0.973353259
ENSMUSG00000004730	Adgre1	adhesion G protein-coupled receptor E1	7.447011528	6.981066551	6.81554751	7.30915047	7.328861815	7.529346092	7.58638684	7.877017106	7.138194015	7.580402963	0.442208949	0.019084722	0.203143767
ENSMUSG00000040928	S100pbp	S100P binding protein	10.51724107	10.26947807	10.17316593	10.04077907	9.588168718	10.66585662	9.744865323	10.33696119	10.25016604	10.08396296	-0.166203074	0.683695272	0.969741274
ENSMUSG00000094382	Gm22192	predicted gene, 22192	1.04569736	0	1.449333651	1.639366891	1.003492829	0.875920088	2.445268757	2.312514971	1.033599476	1.659299161	0.625699686	0.434930572	0.943751087
ENSMUSG00000098602	Mir6946	microRNA 6946	1.04569736	1.037876205	1.449333651	1.639366891	2.590779194	2.117931851	1.078314528	2.575155827	1.293068527	2.09054535	0.797476823	0.238464094	0.77164947
ENSMUSG00000029994	Anxa4	annexin A4	6.996154979	7.107649973	6.521490409	7.489784409	6.77509769	7.116909367	7.228338451	7.345848068	7.028769943	7.116548394	0.087778451	0.762812466	0.973353259
ENSMUSG00000029993	Nfu1	NFU1 iron-sulfur cluster scaffold	9.372939897	9.432224307	9.607087094	9.366132289	9.590050916	9.497041239	9.634192762	9.410305969	9.444595897	9.532897722	0.088301825	0.37918749	0.913918903
ENSMUSG00000029992	Gfpt1	glutamine fructose-6-phosphate transaminase 1	11.05645344	11.06839372	11.18921259	10.9231636	11.11941359	11.15441681	11.24990354	11.13225006	11.05930584	11.163996	0.104690163	0.199279352	0.71474725
ENSMUSG00000029999	Tgfa	transforming growth factor alpha	10.57977888	10.00544607	9.404609817	9.700975997	11.06428883	10.40299981	10.19958291	10.39550044	9.922702689	10.515593	0.592890308	0.075137041	0.452641232
ENSMUSG00000029998	Pcyox1	prenylcysteine oxidase 1	11.67069276	11.64508954	11.8235541	11.45532262	11.52316732	11.68384178	11.5045839	11.46041124	11.64866475	11.54300106	-0.105663689	0.245716073	0.7811231
ENSMUSG00000070166	Gm25821	predicted gene, 25821	1.645576219	0	0	0	2.005236078	0.875920088	1.688464829	1.577122502	0.411394055	1.536685874	1.125291819	0.27408644	0.819489858
ENSMUSG00000006464	Bbs1	Bardet-Biedl syndrome 1 (human)	10.78951158	10.78984406	10.84752041	10.74969277	10.7177795	10.8330433	10.77912593	10.74311831	10.7941422	10.76826676	-0.025875444	0.701957456	0.96988229
ENSMUSG00000006462	A530013C23Rik	RIKEN cDNA A530013C23 gene	0	0	0.899492338	0	2.005236078	1.417032207	2.115933218	0	0.224873085	1.384550376	1.159677291	0.180007617	0.684517887
ENSMUSG00000006463	Zdhhc24	zinc finger, DHHC domain containing 24	9.0670984	8.678222387	9.081832018	8.954132532	8.58438783	8.19629395	8.276198078	8.945349799	8.945321334	8.500557414	-0.44476392	0.011462742	0.147358623
ENSMUSG00000117440	---	---	5.087262684	4.715721513	4.051143259	4.885399987	3.813834889	4.451504748	4.847455465	5.603175101	4.684881861	4.678992551	-0.00588931	0.818310436	0.973353259
ENSMUSG00000022309	Angpt1	angiopoietin 1	6.515241539	7.605770872	6.600811643	6.1882405	5.864838207	7.642213397	7.390041327	7.217121483	6.727516138	7.028553603	0.301037465	0.340334845	0.881980971
ENSMUSG00000091957	Rps2-ps10	ribosomal protein S2, pseudogene 10	8.652003192	9.214205531	9.07490325	9.641084771	9.868056645	9.533267049	9.369098338	9.399752318	9.145549186	9.542543587	0.396994401	0.04306921	0.333762849
ENSMUSG00000006469	Slc34a3	solute carrier family 34 (sodium phosphate), member 3	0	0	1.449333651	0	0	0	0	0	0.362333413	0	-0.362333413	0.692015925	0.969741274
ENSMUSG00000117442	---	---	4.084528611	0	2.819232083	4.398847215	0	2.37180711	2.713220414	1.577122502	2.825651977	1.665537506	-1.160114471	0.070835687	0.440071574
ENSMUSG00000104309	Gm5846	predicted gene 5846	4.172313377	3.06564474	4.606800808	4.246406016	5.094235333	4.95728372	4.231515646	2.797267076	4.022791235	4.270075444	0.247284209	0.4467879	0.953067384
ENSMUSG00000104306	Gm36972	predicted gene, 36972	0	0	1.449333651	0	0	0	0	0	0.362333413	0	-0.362333413	0.692015925	0.969741274
ENSMUSG00000104303	Gm36976	predicted gene, 36976	0	0	0	0	1.003492829	0	0	0	0	0.250873207	0.250873207	0.846512451	0.973353259
ENSMUSG00000104301	Wdr49	WD repeat domain 49	0	2.64754811	0	3.533121572	1.58961773	0	0	0	1.545167421	0.397404432	-1.147762988	0.128922529	0.587634888
ENSMUSG00000076064	Mir690	microRNA 690	0	0	0	0	1.003492829	0	0	0	0	0.250873207	0.250873207	0.846512451	0.973353259
ENSMUSG00000073771	Btbd19	BTB (POZ) domain containing 19	6.531931948	6.868542558	7.618991364	6.124058321	7.569182819	7.574294028	7.594706922	7.907136064	6.785881048	7.661329958	0.87544891	0.003375762	0.065590584
ENSMUSG00000073774	Kncn	kinocilin	1.645576219	0	3.509051426	0	2.005236078	2.941373951	3.134381001	0	1.288656911	2.020247757	0.731590846	0.734112263	0.973353259
ENSMUSG00000073775	Kti12	KTI12 homolog, chromatin associated	8.429572298	8.140600633	8.267818345	8.442560839	8.4374096	8.340802261	7.900115057	8.250357327	8.320138029	8.232171061	-0.087966967	0.587084896	0.969741274
ENSMUSG00000080511	Gm22195	predicted gene, 22195	1.04569736	0	0	0	0	0.875920088	0	0	0.26142434	0.218980022	-0.042444318	0.991579818	0.9978586
ENSMUSG00000073778	Faddos	Fas (TNFRSF6)-associated via death domain, opposite strand	0	0	0	0	0	0	0	1.991176999	0	0.49779425	0.49779425	0.56486706	0.965516704
ENSMUSG00000073779	Lrp8os2	low density lipoprotein receptor-related protein 8, apolipoprotein e receptor, opposite strand 2	4.787071922	3.06564474	4.444258039	4.469424261	6.399211782	6.235168937	4.847455465	4.743549337	4.19159974	5.55634638	1.36474664	0.001525724	0.037491227
ENSMUSG00000076060	Mir704	microRNA 704	1.04569736	1.635246308	0.899492338	2.061062922	1.003492829	0.875920088	1.078314528	0.994123999	1.410374732	0.987962861	-0.422411871	0.537229837	0.965516704
ENSMUSG00000089239	Gm22200	predicted gene, 22200	2.068014459	1.635246308	2.41333609	1.639366891	2.32751257	2.37180711	2.713220414	2.575155827	1.938990937	2.49692398	0.557933043	0.431370281	0.94078569
ENSMUSG00000084601	Gm23111	predicted gene, 23111	1.645576219	0	0.899492338	2.061062922	0	2.117931851	1.078314528	1.577122502	1.15153287	1.19334222	0.041809351	0.9492421	0.9978586
ENSMUSG00000084603	Gm22204	predicted gene, 22204	3.783704699	3.06564474	3.61474788	3.882583475	3.328209112	2.941373951	3.30634127	3.988962792	3.586670199	3.391221781	-0.195448417	0.701966363	0.96988229
ENSMUSG00000084606	Gm23118	predicted gene, 23118	0	1.037876205	0	0	0	0	0	0	0.259469051	0	-0.259469051	0.830018289	0.973353259
ENSMUSG00000089235	Gm23119	predicted gene, 23119	2.068014459	0	0	2.061062922	2.32751257	1.417032207	0	2.312514971	1.032269345	1.514264937	0.481995592	0.673387658	0.969741274
ENSMUSG00000034120	Srsf2	serine/arginine-rich splicing factor 2	12.08785538	11.97412125	11.89970334	12.0019329	12.1458874	12.07476356	12.3265539	12.15971611	11.99090322	12.17673024	0.185827026	0.019264373	0.204359847
ENSMUSG00000034121	Mks1	Meckel syndrome, type 1	6.922116114	7.118625307	7.012128378	7.548017321	7.901765741	7.273075444	7.249570607	7.695639673	7.15022178	7.530012866	0.379791086	0.056252099	0.387078808
ENSMUSG00000034126	Pomt2	protein-O-mannosyltransferase 2	9.76231001	9.750651338	9.814038333	9.878429261	9.717775351	9.713418861	9.941965883	9.902621352	9.801357236	9.818945362	0.017588126	0.829807066	0.973353259
ENSMUSG00000034127	Tspan8	tetraspanin 8	2.068014459	2.382061721	3.394994784	3.659250993	3.465775941	3.348651568	3.30634127	2.797267076	2.876080489	3.229508964	0.353428474	0.692267048	0.969790678
ENSMUSG00000074092	Gm6181	predicted pseudogene 6181	1.645576219	2.05644782	2.41333609	2.652653363	2.813337462	2.587621499	0	1.991176999	2.192003373	1.84803399	-0.343969383	0.939477904	0.9978586
ENSMUSG00000074093	Svip	small VCP/p97-interacting protein	10.6339316	10.62355666	10.49635746	10.5565343	10.66071368	10.78741426	10.47778845	10.71444911	10.57759501	10.66009138	0.082496371	0.318214607	0.862239382
ENSMUSG00000029330	Cds1	CDP-diacylglycerol synthase 1	11.72613562	12.11334218	12.40712018	12.15028756	11.49832688	11.66318512	11.81120887	11.71188841	12.09922139	11.67115232	-0.428069068	0.000617021	0.019734792
ENSMUSG00000029335	Bmp3	bone morphogenetic protein 3	9.17994392	9.683868823	9.73712617	8.858754091	8.758505133	9.5086666	9.812412758	9.924873971	9.364923251	9.501114615	0.136191365	0.62616933	0.969741274
ENSMUSG00000029334	Prkg2	protein kinase, cGMP-dependent, type II	8.511801979	8.113425261	8.369470863	8.699041495	7.877312197	8.163050404	8.706799553	8.468037351	8.4234349	8.303799876	-0.119635023	0.574464794	0.969741274
ENSMUSG00000029337	Fgf5	fibroblast growth factor 5	6.336770718	6.842298964	6.408452328	6.709418227	5.051160406	6.625209677	6.560282233	5.346064338	6.574235059	5.895679164	-0.678555895	0.11019373	0.547666468
ENSMUSG00000029338	Antxr2	anthrax toxin receptor 2	5.547439061	5.320791791	5.77229178	5.751738801	5.591794709	5.552585985	5.904799339	6.010773679	5.598065358	5.764988428	0.166923069	0.507001541	0.965516704
ENSMUSG00000094805	Olfr311	olfactory receptor 311	0	0	0	0	3.328209112	0	0	2.575155827	0	1.475841235	1.475841235	0.055437617	0.384187739
ENSMUSG00000046434	Hnrnpa1	heterogeneous nuclear ribonucleoprotein A1	12.53291941	12.5262391	12.43083067	12.44442841	12.72293818	12.5907719	12.63613447	12.69644746	12.4836044	12.661573	0.177968602	0.006421667	0.101522955
ENSMUSG00000083373	Gm13392	predicted gene 13392	0	1.037876205	0.899492338	1.639366891	1.58961773	0	1.078314528	0.994123999	0.894183859	0.915514064	0.021330206	0.996171864	0.999019947
ENSMUSG00000083372	Gm11235	predicted gene 11235	0	0	0	0	0	0	0	1.577122502	0	0.394280625	0.394280625	0.681264798	0.969741274
ENSMUSG00000083375	Gm15057	predicted gene 15057	0	0	0	0	0	1.417032207	0	0.994123999	0	0.602789051	0.602789051	0.593836792	0.969741274
ENSMUSG00000083374	Gm11449	predicted gene 11449	0	1.037876205	0.899492338	1.040994419	1.003492829	0.875920088	1.078314528	0.994123999	0.74459074	0.987962861	0.243372121	0.823800843	0.973353259
ENSMUSG00000088185	Scarna2	small Cajal body-specific RNA 2	2.394364844	1.635246308	0	1.040994419	0	1.809634363	0	0.994123999	1.267651393	0.70093959	-0.566711802	0.561448387	0.965516704
ENSMUSG00000046432	Bex3	brain expressed X-linked 3	10.39598436	10.17011381	10.35384561	10.09898044	10.18064833	10.25605011	10.53942797	10.13925091	10.25473105	10.27884433	0.024113274	0.812646979	0.973353259
ENSMUSG00000035299	Mid1	midline 1	8.545070232	7.283744263	7.831226655	6.987091268	9.01539233	8.729400845	8.509706331	8.075730279	7.661783104	8.582557446	0.920774342	0.033120514	0.287933782
ENSMUSG00000035298	Klhl35	kelch-like 35	5.174886192	5.320791791	4.657152062	5.122865449	5.433080099	5.446060447	5.434280405	5.512042948	5.068923873	5.456365975	0.387442101	0.163030114	0.655577048
ENSMUSG00000035293	G2e3	G2/M-phase specific E3 ubiquitin ligase	9.395915446	9.206510448	9.301537546	9.263115096	9.094427269	9.279697246	9.314734463	9.323632625	9.291769634	9.253122901	-0.038646733	0.694649448	0.96988229
ENSMUSG00000035297	Cops4	COP9 signalosome subunit 4	10.40959544	10.38192669	10.56801574	10.26690283	10.35237712	10.54605873	10.53727131	10.38911215	10.40661018	10.45620483	0.04959465	0.605423871	0.969741274
ENSMUSG00000035296	Sgcg	sarcoglycan, gamma (dystrophin-associated glycoprotein)	0	0	0	0	1.58961773	0	0	2.989701238	0	1.144829742	1.144829742	0.165560519	0.661239178
ENSMUSG00000035295	Wdr38	WD repeat domain 38	5.21677981	4.24065392	3.71322647	2.652653363	4.650554971	4.33693292	4.605430475	4.15880572	3.955828391	4.437931022	0.482102631	0.650196594	0.969741274
ENSMUSG00000042532	Golga7b	golgi autoantigen, golgin subfamily a, 7B	11.71475942	12.03041496	12.0869814	12.30785388	11.86145418	11.78905041	11.81699854	11.68953398	12.03500241	11.78925928	-0.245743137	0.023385343	0.231426754
ENSMUSG00000059939	9430015G10Rik	RIKEN cDNA 9430015G10 gene	9.282135261	9.38528141	9.277597	9.48375196	9.4227088	9.289357789	9.352021927	9.401869233	9.357191408	9.366489437	0.00929803	0.930871504	0.9978586
ENSMUSG00000007415	Gatad1	GATA zinc finger domain containing 1	10.78690656	10.78037215	10.775984	11.01671763	10.64992709	10.75221974	10.55869416	10.6266673	10.83999508	10.64687707	-0.19311801	0.024432991	0.237702252
ENSMUSG00000007411	Mark3	MAP/microtubule affinity regulating kinase 3	11.07721262	11.01505991	11.08271503	11.09483854	10.83748861	10.86956592	10.94367704	10.87773416	11.06745652	10.88211643	-0.185340091	0.003867029	0.07197409
ENSMUSG00000092972	Mir3078	microRNA 3078	1.04569736	1.037876205	0.899492338	1.040994419	1.003492829	0.875920088	1.078314528	0.994123999	1.00601508	0.987962861	-0.018052219	0.981393144	0.9978586
ENSMUSG00000048347	Pcdhb18	protocadherin beta 18	7.857775662	7.492209665	7.852990824	7.59612618	7.458148561	7.916066323	7.766566731	7.833765426	7.699775582	7.74363676	0.043861178	0.769653778	0.973353259
ENSMUSG00000092974	Gm25072	predicted gene, 25072	0	0	0	0	0	0	1.078314528	0	0	0.269578632	0.269578632	0.846512451	0.973353259
ENSMUSG00000035745	Grin3b	glutamate receptor, ionotropic, NMDA3B	5.257491152	2.05644782	3.973791331	4.246406016	3.328209112	4.703507358	3.949570471	3.574171483	3.88353408	3.888864606	0.005330526	0.633736457	0.969741274
ENSMUSG00000078546	Zfp995	zinc finger protein 995	7.020013646	6.919639589	7.185107144	6.694763342	6.693410172	7.116909367	7.260070645	6.558204035	6.95488093	6.907148555	-0.047732375	0.874212189	0.98071557
ENSMUSG00000082762	Gm12366	predicted gene 12366	4.255061632	3.236588011	3.394994784	3.659250993	4.006542134	4.145967774	4.14351718	3.895902629	3.636473855	4.047982429	0.411508574	0.381395199	0.914837849
ENSMUSG00000087982	Gm22224	predicted gene, 22224	1.04569736	0	0	0	0	0.875920088	1.688464829	0	0.26142434	0.641096229	0.379671889	0.674766569	0.969741274
ENSMUSG00000075327	Zbtb2	zinc finger and BTB domain containing 2	8.987654133	8.839487446	8.78058109	8.815381115	8.514752741	8.760295012	8.603393196	8.531287487	8.855775946	8.602432109	-0.253343837	0.019597982	0.206579648
ENSMUSG00000075324	Fign	fidgetin	6.065886046	6.597552985	6.333024186	5.538499508	7.399253214	6.861143733	6.971492818	7.33702466	6.133740681	7.142228607	1.008487925	3.98E-05	0.002538796
ENSMUSG00000045160	Bola3	bolA-like 3 (E. coli)	8.59754653	8.156663494	7.895558268	8.086174644	8.146503893	8.107340533	8.544482264	8.664209909	8.183985734	8.36563415	0.181648416	0.321667365	0.86602752
ENSMUSG00000107102	Gm42726	predicted gene 42726	3.541470204	1.037876205	3.61474788	4.469424261	3.006106913	4.451504748	4.049800494	3.159462173	3.165879637	3.666718582	0.500838945	0.732466683	0.973353259
ENSMUSG00000058600	Rpl30	ribosomal protein L30	10.79816117	10.64743578	10.45426158	10.64971048	11.09642451	10.49520806	10.53835004	10.88834222	10.63739225	10.75458121	0.117188957	0.324571862	0.868863959
ENSMUSG00000064925	Snora62	small nucleolar RNA, H/ACA box 62	1.645576219	0	0.899492338	0	2.005236078	1.809634363	2.713220414	1.577122502	0.636267139	2.026303339	1.3900362	0.126427572	0.582187522
ENSMUSG00000050383	Svs3b	seminal vesicle secretory protein 3B	0	0	0	0	0	1.809634363	0	2.312514971	0	1.030537333	1.030537333	0.28023334	0.82806791
ENSMUSG00000078896	Zfp965	zinc finger protein 965	5.76070528	6.182251265	5.496202907	5.471300104	6.196706431	5.446060447	5.850248223	5.965691564	5.727614889	5.864676666	0.137061777	0.619117225	0.969741274
ENSMUSG00000078897	Gm4724	predicted gene 4724	7.490354704	7.405247549	7.618991364	7.318739992	7.424789033	7.666139499	7.706414284	7.422920541	7.458333402	7.555065839	0.096732437	0.510274473	0.965516704
ENSMUSG00000001151	Pcnt	pericentrin (kendrin)	10.23457276	10.42345567	10.47019182	10.60338416	10.21764269	10.03615122	10.00106175	10.28629593	10.4329011	10.1352879	-0.297613206	0.004468815	0.07883945
ENSMUSG00000001157	Gmcl1	germ cell-less, spermatogenesis associated 1	9.906878485	9.787223536	9.972800296	9.944957862	9.942135163	9.965601079	10.09349616	9.921926712	9.902965045	9.980789778	0.077824733	0.359267212	0.900883832
ENSMUSG00000001156	Mxd1	MAX dimerization protein 1	10.08000976	9.963449772	10.08280455	10.10868677	9.758513207	9.811882747	9.847649476	9.835294151	10.05873771	9.813334895	-0.245402818	0.001255609	0.032771093
ENSMUSG00000001155	Ftcd	formiminotransferase cyclodeaminase	0	2.05644782	0	0	0	0	0	0	0.514111955	0	-0.514111955	0.541846636	0.965516704
ENSMUSG00000078891	Gm11008	predicted gene 11008	1.04569736	1.037876205	0.899492338	0	1.003492829	1.417032207	0	1.577122502	0.745766476	0.999411885	0.253645409	0.715304252	0.971449266
ENSMUSG00000097906	Gm9625	predicted gene 9625	5.297085122	5.282265739	5.55049135	4.246406016	4.913635787	5.603037346	5.102113538	5.603175101	5.094062057	5.305490443	0.211428386	0.615032822	0.969741274
ENSMUSG00000001158	Snrnp27	small nuclear ribonucleoprotein 27 (U4/U6.U5)	9.411783359	8.999445942	9.008577698	8.987582858	9.131086061	9.14571714	9.14099548	8.933691787	9.101847464	9.087872617	-0.013974847	0.856322198	0.974479755
ENSMUSG00000078898	Zfp968	zinc finger protein 968	3.991054272	4.530898564	4.752870796	3.394899473	4.398963161	4.703507358	4.605430475	4.381104338	4.167430776	4.522251333	0.354820557	0.492230562	0.965516704
ENSMUSG00000010277	2610507B11Rik	RIKEN cDNA 2610507B11 gene	13.06044616	13.32744137	13.37031752	13.41763396	13.16669015	13.25427774	13.23954473	13.26667461	13.29395975	13.23179681	-0.062162945	0.451513553	0.955546625
ENSMUSG00000087323	Gm14170	predicted gene 14170	0	0	0	0	2.32751257	1.417032207	0	0	0	0.936136194	0.936136194	0.339061982	0.881053508
ENSMUSG00000082132	Gm13541	predicted gene 13541	2.66033993	0	0.899492338	0	1.58961773	1.417032207	3.725440712	1.991176999	0.889958067	2.180816912	1.290858845	0.210648692	0.732132649
ENSMUSG00000087321	Gm5353	predicted gene 5353	1.645576219	1.635246308	1.449333651	3.394899473	3.706881428	0.875920088	3.134381001	2.575155827	2.031263913	2.573084586	0.541820673	0.431088382	0.940300908
ENSMUSG00000087326	Gm12503	predicted gene 12503	0	2.05644782	0	0	2.005236078	0	2.713220414	0	0.514111955	1.179614123	0.665502168	0.50337292	0.965516704
ENSMUSG00000087327	Gm15884	predicted gene 15884	4.255061632	3.236588011	3.394994784	0	2.590779194	2.587621499	1.688464829	3.159462173	2.721661107	2.506581924	-0.215079183	0.322395127	0.866946406
ENSMUSG00000087328	Gm12120	predicted gene 12120	4.172313377	4.463626252	4.606800808	4.469424261	3.913403719	4.395355878	4.538001383	5.117844779	4.428041174	4.49115144	0.063110265	0.754138794	0.973353259
ENSMUSG00000051839	Gypa	glycophorin A	0	2.05644782	0	0	0	0	0	1.991176999	0.514111955	0.49779425	-0.016317705	0.979627529	0.9978586
ENSMUSG00000038188	Scarf1	scavenger receptor class F, member 1	6.628212003	6.855480433	7.193661262	7.209577339	7.094388884	7.054828309	7.260070645	7.439502644	6.971732759	7.212197621	0.240464861	0.223873342	0.751660575
ENSMUSG00000032212	Sltm	SAFB-like, transcription modulator	11.52250192	11.20467781	11.06125679	11.19521368	11.1304489	11.14859029	11.21996275	11.20194074	11.24591255	11.17523567	-0.070676878	0.428534014	0.939156729
ENSMUSG00000032216	Nedd4	neural precursor cell expressed, developmentally down-regulated 4	12.6022233	12.55354025	12.5505431	12.30664961	12.40598677	12.66574684	12.39216445	12.49824835	12.50323907	12.4905366	-0.012702463	0.892239171	0.985999941
ENSMUSG00000032217	Rnf111	ring finger 111	10.83645513	10.44432566	10.52120767	10.61607848	10.3084679	10.39675706	10.41692074	10.59925632	10.60451673	10.43035051	-0.174166228	0.092781279	0.502075104
ENSMUSG00000032215	Rsl24d1	ribosomal L24 domain containing 1	8.779778302	9.722150954	9.533183873	9.905728132	9.661604616	9.058014611	9.407387424	8.892130497	9.485210315	9.254784287	-0.230426029	0.227133938	0.755277785
ENSMUSG00000010825	Grid2ip	glutamate receptor, ionotropic, delta 2 (Grid2) interacting protein 1	8.361172249	7.483745578	6.95289431	8.215002552	7.14647921	6.524101517	7.217604033	6.846306891	7.753203672	6.933622913	-0.819580759	0.00111667	0.030303314
ENSMUSG00000032218	Ccnb2	cyclin B2	5.76070528	5.072504157	5.576888231	5.86078542	4.960948988	4.002991028	5.541461475	4.796001121	5.567720772	4.825350653	-0.742370119	0.044848223	0.340505182
ENSMUSG00000102330	Gm37234	predicted gene, 37234	0	0	0.899492338	0	0	0	0	1.991176999	0.224873085	0.49779425	0.272921165	0.712447741	0.970687309
ENSMUSG00000084987	Gm13134	predicted gene 13134	0	0	0	1.639366891	1.003492829	0	0	1.991176999	0.409841723	0.748667457	0.338825734	0.731619473	0.973353259
ENSMUSG00000084985	Gm16135	predicted gene 16135	1.04569736	0	0	0	0	0	1.078314528	0.994123999	0.26142434	0.518109632	0.256685292	0.833443211	0.973353259
ENSMUSG00000084984	Far1os	fatty acyl CoA reductase 1, opposite strand	2.394364844	2.64754811	2.157573411	3.070993449	2.590779194	2.117931851	2.445268757	2.989701238	2.567619953	2.53592026	-0.031699693	0.952925535	0.9978586
ENSMUSG00000084983	Gm11789	predicted gene 11789	2.394364844	0	0	0	1.58961773	0	0	0	0.598591211	0.397404432	-0.201186778	0.732963959	0.973353259
ENSMUSG00000084980	Slc36a1os	solute carrier family 36 (proton/amino acid symporter), member 1, opposite strand	0	0	0	2.652653363	0	0	0	0	0.663163341	0	-0.663163341	0.404587287	0.925901209
ENSMUSG00000084989	Crocc2	ciliary rootlet coiled-coil, rootletin family member 2	5.21677981	2.64754811	3.80541029	3.070993449	4.707149209	0	0	5.573432784	3.685182915	2.570145498	-1.115037416	0.8978686	0.988036188
ENSMUSG00000040265	Dnm3	dynamin 3	12.40399116	12.35901454	12.47030919	12.05704266	12.00662326	12.38338008	12.05191488	11.9344022	12.32258939	12.09408011	-0.228509282	0.0588281	0.396828605
ENSMUSG00000040263	Klhdc4	kelch domain containing 4	8.903578893	9.097011057	9.063280838	9.103072678	9.252518462	9.273869716	9.383576091	9.114949592	9.041735866	9.256228465	0.214492599	0.030845194	0.276024274
ENSMUSG00000040260	Daam2	dishevelled associated activator of morphogenesis 2	12.23431191	12.26490113	11.85725983	12.13340563	12.29035362	12.10461808	11.99254744	12.24943983	12.12246962	12.15923974	0.036770116	0.756873136	0.973353259
ENSMUSG00000040268	Plekha1	pleckstrin homology domain containing, family A (phosphoinositide binding specific) member 1	10.25858791	10.55754043	10.18286544	10.41506846	10.24657	10.04416178	10.18312456	10.20982099	10.35351556	10.17091933	-0.182596228	0.0633675	0.414035576
ENSMUSG00000040269	Mrps28	mitochondrial ribosomal protein S28	6.498355777	7.492209665	7.513616963	7.167740637	7.206602218	7.363652154	7.594706922	7.086342355	7.167980761	7.312825912	0.144845152	0.649138877	0.969741274
ENSMUSG00000010797	Wnt2	wingless-type MMTV integration site family, member 2	7.144617915	6.881487478	7.096654917	6.925662221	6.864898214	7.399776079	6.642839144	5.821321408	7.012105633	6.682208711	-0.329896921	0.40340089	0.925901209
ENSMUSG00000024251	Thada	thyroid adenoma associated	8.264615361	8.644447212	8.599310459	8.347387308	8.553853072	8.458508351	8.040728003	8.719570819	8.463940085	8.443165061	-0.020775023	0.956602664	0.9978586
ENSMUSG00000024253	Dync2li1	dynein cytoplasmic 2 light intermediate chain 1	8.187705232	7.950990194	8.361900733	7.999394363	8.301575805	8.351908589	8.366427353	8.384863834	8.124997631	8.351193895	0.226196265	0.087974024	0.489976551
ENSMUSG00000024254	Abcg8	ATP-binding cassette, sub-family G (WHITE), member 8	0	0	0	0	2.590779194	0	0	0	0	0.647694799	0.647694799	0.422770505	0.93752711
ENSMUSG00000024256	Adcyap1	adenylate cyclase activating polypeptide 1	8.274567096	9.464843742	9.837426712	8.713653206	10.1181066	8.48565316	9.668097873	9.391253456	9.072622689	9.415777772	0.343155083	0.48297492	0.964147298
ENSMUSG00000024259	Slc25a46	solute carrier family 25, member 46	11.84985461	11.62838845	11.85186551	11.56716093	11.39875524	11.66429925	11.57302965	11.45888701	11.72431738	11.52374279	-0.200574589	0.036055115	0.302993415
ENSMUSG00000024258	Polr2d	polymerase (RNA) II (DNA directed) polypeptide D	8.274567096	8.183043782	8.319539725	8.42934302	8.433221744	8.522162452	8.376113169	8.217082071	8.301623406	8.387144859	0.085521453	0.454614355	0.956861716
ENSMUSG00000059486	Kbtbd2	kelch repeat and BTB (POZ) domain containing 2	10.84982946	10.76648286	10.80139222	10.63347283	10.46332668	10.74451488	10.6251848	10.29201407	10.76279434	10.53126011	-0.231534234	0.036076541	0.302993415
ENSMUSG00000059481	Plg	plasminogen	5.611655722	3.236588011	0	2.061062922	0	0	0	2.575155827	2.727326664	0.643788957	-2.083537707	0.137768422	0.60714732
ENSMUSG00000059482	2610301B20Rik	RIKEN cDNA 2610301B20 gene	9.55134728	9.709502778	9.738588378	9.552420549	9.424819562	9.921553273	9.922267832	9.62848372	9.637964746	9.724281097	0.08631635	0.426709753	0.93806009
ENSMUSG00000056687	Gm11696	predicted gene 11696	6.154778065	5.980458848	4.261049233	5.364240691	6.176805549	5.627616478	5.47089934	5.79579002	5.440131709	5.767777847	0.327646138	0.589835823	0.969741274
ENSMUSG00000061937	Csn1s2a	casein alpha s2-like A	0	2.05644782	0	0	0	0	0	0	0.514111955	0	-0.514111955	0.541846636	0.965516704
ENSMUSG00000027551	Zfp64	zinc finger protein 64	8.7586622	8.832838296	8.677625448	8.568477075	8.846165814	8.882766694	9.041033592	8.870892067	8.709400755	8.910214542	0.200813787	0.05699771	0.390170901
ENSMUSG00000027550	Lrrcc1	leucine rich repeat and coiled-coil domain containing 1	8.903578893	8.674508401	8.825305922	8.130407883	9.01539233	8.505681764	9.231812968	9.382704231	8.633450275	9.033897823	0.400447548	0.038945837	0.316403953
ENSMUSG00000055489	Ano5	anoctamin 5	4.172313377	4.826969182	5.410736395	4.324639127	5.83974512	5.300789739	4.790648282	5.821321408	4.68366452	5.438126137	0.754461617	0.046046958	0.345189974
ENSMUSG00000005107	Slc2a9	solute carrier family 2 (facilitated glucose transporter), member 9	4.730353856	5.116967398	4.444258039	5.248595212	5.650694198	4.505549955	4.31445375	4.988593426	4.885043626	4.864822832	-0.020220793	0.900841753	0.989159572
ENSMUSG00000005102	Eif2ak4	eukaryotic translation initiation factor 2 alpha kinase 4	9.722876902	9.814478771	9.563200959	9.719193339	9.621678189	9.635272607	9.69736644	9.784276876	9.704937493	9.684648528	-0.020288965	0.815365182	0.973353259
ENSMUSG00000005103	Wdr1	WD repeat domain 1	11.15805743	11.67745883	11.79186174	11.28722673	11.41689591	11.56399962	11.63384012	11.58999856	11.47865118	11.55118355	0.072532372	0.703137125	0.96988229
ENSMUSG00000055480	Zfp458	zinc finger protein 458	7.055077764	7.396255935	7.050308372	7.250234931	6.877282451	7.448876566	7.249570607	7.345848068	7.187969251	7.230394423	0.042425173	0.756048187	0.973353259
ENSMUSG00000055485	Soga1	suppressor of glucose, autophagy associated 1	9.269750251	10.16482896	9.74296613	10.0436733	10.13882798	9.627677038	9.799873729	10.46599052	9.80530466	10.00809232	0.202787658	0.312294491	0.858745862
ENSMUSG00000081441	Gm6161	predicted gene 6161	5.611655722	5.358315736	5.653299085	5.166004367	5.561417974	5.360664488	5.506611763	5.846408813	5.447318728	5.56877576	0.121457032	0.656575956	0.969741274
ENSMUSG00000081445	Rpl23a-ps4	ribosomal protein L23A, pseudogene 4	0	0	0	0	0	0	1.688464829	0	0	0.422116207	0.422116207	0.668370292	0.969741274
ENSMUSG00000109616	Gm45393	predicted gene 45393	0	0	1.846484642	0	0	0	0	1.991176999	0.46162116	0.49779425	0.036173089	0.959402834	0.9978586
ENSMUSG00000059159	Gm8129	predicted pseudogene 8129	4.172313377	4.157952906	4.1944172	3.882583475	5.216242458	3.925812223	3.949570471	4.310743152	4.101816739	4.350592076	0.248775336	0.402067847	0.925901209
ENSMUSG00000015354	Pcolce2	procollagen C-endopeptidase enhancer 2	7.557104158	7.636640175	6.494050318	7.157089108	7.176853888	7.516242347	6.690196816	6.558204035	7.21122094	6.985374271	-0.225846668	0.38808518	0.920361537
ENSMUSG00000015355	Cd48	CD48 antigen	3.667665513	4.463626252	4.261049233	3.659250993	4.591649679	4.212471312	3.134381001	3.796423229	4.012897998	3.933731305	-0.079166693	0.957482769	0.9978586
ENSMUSG00000059150	Rpl26-ps4	ribosomal protein L26, pseudogene 4	1.04569736	0	0	1.040994419	0	0	1.688464829	0	0.521672945	0.422116207	-0.099556738	0.999641794	0.999829732
ENSMUSG00000015357	Clpx	caseinolytic mitochondrial matrix peptidase chaperone subunit	9.615394016	9.362379171	9.719463099	9.504907916	9.619836831	9.610824674	9.626097941	9.537061662	9.55053605	9.598455277	0.047919227	0.674528035	0.969741274
ENSMUSG00000040482	Dxo	decapping exoribonuclease	8.693393641	8.582377813	8.879330024	8.941773883	8.919852119	8.785089056	8.663951745	8.811617309	8.77421884	8.795127557	0.020908717	0.888443866	0.984931345
ENSMUSG00000040483	Xaf1	XIAP associated factor 1	7.111688149	7.028391864	6.804420316	6.752510322	6.949435139	7.00878996	6.996826212	7.65361813	6.924252663	7.15216736	0.227914698	0.210996584	0.73262384
ENSMUSG00000040481	Bptf	bromodomain PHD finger transcription factor	11.49563276	11.77996195	11.58390167	11.57117826	11.32833894	11.33783471	11.21929029	11.50096848	11.60766866	11.3466081	-0.261060557	0.004068575	0.07472471
ENSMUSG00000040488	Ltbp4	latent transforming growth factor beta binding protein 4	11.37478072	11.35436467	11.41312004	11.73725659	11.74844218	11.62058013	11.89486304	12.01647823	11.4698805	11.82009089	0.350210388	0.002249861	0.04987192
ENSMUSG00000040489	Sox30	SRY (sex determining region Y)-box 30	4.255061632	2.05644782	3.509051426	3.070993449	3.176128642	4.33693292	3.459970513	3.159462173	3.222888582	3.533123562	0.31023498	0.714231998	0.971449266
ENSMUSG00000051306	Usp42	ubiquitin specific peptidase 42	9.849779141	9.807713082	9.95026077	9.924691575	9.731482849	9.786184802	9.849388921	9.772872218	9.883111142	9.784982197	-0.098128944	0.205914722	0.725218375
ENSMUSG00000095478	Gm9824	predicted pseudogene 9824	7.289070324	7.331694837	7.580372252	7.472705388	7.741654165	7.341535503	7.321514942	7.255087286	7.4184607	7.414947974	-0.003512726	0.986019329	0.9978586
ENSMUSG00000108878	AC154141.1	---	5.547439061	6.161174106	5.860888931	6.124058321	5.98414666	5.873500455	6.436140443	6.380682147	5.923390105	6.168617426	0.245227321	0.311943211	0.858514978
ENSMUSG00000108870	Gm44893	predicted gene 44893	0	0	0.899492338	0	1.003492829	0	0	0	0.224873085	0.250873207	0.026000123	0.991579818	0.9978586
ENSMUSG00000108871	Gm45102	predicted gene 45102	3.079044871	3.527574467	3.973791331	4.075933197	4.176515485	3.757841642	3.30634127	4.512299928	3.664085966	3.938249581	0.274163615	0.520806293	0.965516704
ENSMUSG00000108874	Gm9711	predicted gene 9711	0	0	0	0	0	0	1.078314528	0	0	0.269578632	0.269578632	0.846512451	0.973353259
ENSMUSG00000108875	Gm45064	predicted gene 45064	2.068014459	0	0	0	0	0	0	0	0.517003615	0	-0.517003615	0.539180863	0.965516704
ENSMUSG00000081933	Gm14767	predicted gene 14767	1.645576219	0	1.846484642	0	2.005236078	0	0	2.575155827	0.873015215	1.145097976	0.272082761	0.688217575	0.969741274
ENSMUSG00000081176	H3f3a-ps2	H3 histone, family 3A, pseudogene 2	4.172313377	5.320791791	5.082598685	4.721563563	6.115400801	5.766897212	5.054651607	5.032976351	4.824316854	5.492481493	0.668164639	0.052494657	0.371493598
ENSMUSG00000085211	B430219N15Rik	RIKEN cDNA B430219N15 gene	2.068014459	2.05644782	1.846484642	2.061062922	2.590779194	1.809634363	2.445268757	3.448730115	2.008002461	2.573603107	0.565600647	0.30407793	0.852874431
ENSMUSG00000085213	Gm13091	predicted gene 13091	4.99397117	4.826969182	4.885501747	4.469424261	4.707149209	3.925812223	5.054651607	4.743549337	4.79396659	4.607790594	-0.186175996	0.645298621	0.969741274
ENSMUSG00000098618	Gm27299	predicted gene, 27299	1.04569736	0	0	0	1.58961773	0	0	1.991176999	0.26142434	0.895198682	0.633774342	0.445523529	0.95243028
ENSMUSG00000085218	BB218582	expressed sequence BB218582	4.407550957	2.8716894	3.71322647	3.394899473	3.913403719	4.65650582	3.949570471	4.743549337	3.596841575	4.315757336	0.718915761	0.134245402	0.599249313
ENSMUSG00000098617	Gm27300	predicted gene, 27300	1.04569736	1.037876205	0.899492338	1.040994419	1.003492829	0.875920088	1.078314528	0.994123999	1.00601508	0.987962861	-0.018052219	0.981393144	0.9978586
ENSMUSG00000098614	Gm27301	predicted gene, 27301	1.645576219	1.037876205	1.846484642	1.040994419	0	0	1.078314528	0.994123999	1.392732871	0.518109632	-0.874623239	0.311525916	0.858269224
ENSMUSG00000098613	Mir6931	microRNA 6931	1.645576219	1.037876205	1.449333651	1.040994419	2.005236078	1.417032207	1.078314528	0.994123999	1.293445124	1.373676703	0.080231579	0.885559498	0.983493927
ENSMUSG00000116797	---	---	2.394364844	2.382061721	1.449333651	3.070993449	1.003492829	0	2.115933218	2.989701238	2.324188416	1.527281822	-0.796906595	0.534549056	0.965516704
ENSMUSG00000047281	Sfn	stratifin	5.921350221	5.880836339	5.882213448	6.167162113	6.546061189	6.135858716	5.47089934	5.632316622	5.96289053	5.946283967	-0.016606564	0.862660424	0.977151718
ENSMUSG00000047284	Neurl4	neuralized E3 ubiquitin protein ligase 4	11.92798981	12.04559015	12.00945959	12.1808434	12.11647986	11.90323853	12.13982421	11.99455292	12.04097074	12.03852388	-0.002446858	0.977189502	0.9978586
ENSMUSG00000116795	---	---	0	2.64754811	0.899492338	2.061062922	1.003492829	2.37180711	1.078314528	0.994123999	1.402025843	1.361934617	-0.040091226	0.811561675	0.973353259
ENSMUSG00000091471	Gm20538	predicted gene 20538	0	0	0	0	0	0	0	1.577122502	0	0.394280625	0.394280625	0.681264798	0.969741274
ENSMUSG00000057228	Aadat	aminoadipate aminotransferase	3.541470204	2.64754811	0	1.639366891	2.590779194	1.809634363	0	2.575155827	1.957096301	1.743892346	-0.213203955	0.656257458	0.969741274
ENSMUSG00000057229	Atp5sl	ATP5S-like	10.28220983	9.621580427	9.740049105	9.923120774	9.785046425	9.920310317	9.66612536	10.1277858	9.891740035	9.874816976	-0.016923059	0.849831211	0.973539468
ENSMUSG00000057223	Gm6578	predicted gene 6578	0	1.635246308	0	2.652653363	2.813337462	1.417032207	0	2.575155827	1.071974918	1.701381374	0.629406456	0.577909452	0.969741274
ENSMUSG00000029092	D5Ertd615e	DNA segment, Chr 5, ERATO Doi 615, expressed	0	0	0	2.061062922	0	0	0	1.577122502	0.51526573	0.394280625	-0.120985105	0.847340141	0.973353259
ENSMUSG00000027967	Neurog2	neurogenin 2	4.084528611	4.393062975	2.819232083	4.163686085	4.591649679	4.276043866	4.902110306	4.44819295	3.865127439	4.5544992	0.689371762	0.138043139	0.607842037
ENSMUSG00000046886	Zfp474	zinc finger protein 474	3.079044871	1.635246308	1.846484642	0	4.328557257	0	0	3.689572954	1.640193955	2.004532553	0.364338598	0.300537271	0.849627995
ENSMUSG00000046881	Olfr374	olfactory receptor 374	0	2.64754811	2.41333609	3.070993449	0	2.37180711	0	0	2.032969412	0.592951777	-1.440017635	0.203886388	0.721531691
ENSMUSG00000066705	Fxyd6	FXYD domain-containing ion transport regulator 6	10.79470755	11.25092506	11.30969265	10.79677133	11.05341588	11.15494533	11.59859337	11.62982788	11.03802415	11.35919562	0.321171469	0.041183322	0.325872988
ENSMUSG00000066704	Cyp2b19	cytochrome P450, family 2, subfamily b, polypeptide 19	0	2.05644782	2.41333609	0	2.32751257	1.417032207	2.713220414	0	1.117445977	1.614441298	0.49699532	0.70041292	0.96988229
ENSMUSG00000084166	Gm6451	predicted gene 6451	3.667665513	3.389405204	3.71322647	2.061062922	4.398963161	2.941373951	3.598803161	3.159462173	3.207840027	3.524650611	0.316810584	0.595221716	0.969741274
ENSMUSG00000095463	Entpd4	ectonucleoside triphosphate diphosphohydrolase 4	10.61349427	10.5484379	10.69243895	10.77951344	10.67497148	11.11421573	10.56081905	10.37840173	10.65847114	10.682102	0.023630859	0.730585363	0.973353259
ENSMUSG00000114189	AC134608.1	---	3.403168963	2.64754811	2.157573411	3.070993449	4.094030572	4.076249871	3.459970513	3.796423229	2.819820983	3.856668547	1.036847563	0.041383017	0.326481934
ENSMUSG00000103261	Gm36981	predicted gene, 36981	2.068014459	3.06564474	0	0	1.58961773	0	2.713220414	3.796423229	1.2834148	2.024815343	0.741400544	0.478503686	0.963614476
ENSMUSG00000111968	AC124399.1	---	0	0	0	0	2.32751257	1.809634363	1.688464829	1.577122502	0	1.850683566	1.850683566	0.030269028	0.272716064
ENSMUSG00000111964	AC153825.1	---	3.403168963	4.318870111	3.973791331	4.662538529	4.466092426	4.607921302	3.459970513	3.895902629	4.089592233	4.107471718	0.017879484	0.946097287	0.9978586
ENSMUSG00000111966	AL589661.1	---	2.068014459	0	0	1.639366891	0	0	0	0	0.926845338	0	-0.926845338	0.366564705	0.905902412
ENSMUSG00000111962	AC152947.1	---	2.068014459	2.64754811	0	2.061062922	0	1.809634363	0	0	1.694156373	0.452408591	-1.241747782	0.227842634	0.756001755
ENSMUSG00000052769	Gm9889	predicted gene 9889	2.068014459	2.64754811	2.41333609	2.652653363	2.813337462	2.775313294	1.688464829	1.991176999	2.445388006	2.317073146	-0.128314859	0.932874582	0.9978586
ENSMUSG00000052760	A630001G21Rik	RIKEN cDNA A630001G21 gene	4.255061632	4.463626252	3.80541029	3.982495002	4.650554971	3.567705506	3.841853679	5.197996871	4.126648294	4.314527757	0.187879463	0.473871298	0.960965963
ENSMUSG00000052763	Zfp212	Zinc finger protein 212	8.356494845	8.500836285	8.615317251	8.713653206	8.502812969	8.548146111	8.671837507	8.515733016	8.546575397	8.559632401	0.013057004	0.950983779	0.9978586
ENSMUSG00000025658	Cnksr2	connector enhancer of kinase suppressor of Ras 2	12.48309764	12.67886156	12.82576467	12.48864047	12.26730732	12.46875605	12.40936466	12.32333742	12.61909108	12.36719137	-0.251899719	0.00768061	0.114349387
ENSMUSG00000065608	Mirlet7c-2	microRNA let7c-2	1.04569736	1.037876205	0.899492338	1.040994419	1.003492829	0.875920088	1.078314528	0.994123999	1.00601508	0.987962861	-0.018052219	0.981393144	0.9978586
ENSMUSG00000064412	Gm22246	predicted gene, 22246	0	0	0.899492338	0	0	0	0	0	0.224873085	0	-0.224873085	0.830018289	0.973353259
ENSMUSG00000064417	DQ267102	snoRNA DQ267102	1.04569736	1.037876205	0.899492338	1.040994419	1.003492829	0.875920088	1.078314528	0.994123999	1.00601508	0.987962861	-0.018052219	0.981393144	0.9978586
ENSMUSG00000102272	Gm7512	predicted gene 7512	0	0	0	0	0	0	0	1.577122502	0	0.394280625	0.394280625	0.681264798	0.969741274
ENSMUSG00000018040	Rrp7a	ribosomal RNA processing 7 homolog A (S. cerevisiae)	11.0287916	11.15689883	11.15293561	11.1569672	11.1529063	11.29914915	11.24660731	11.17681788	11.12389831	11.21887016	0.094971852	0.179254496	0.682825237
ENSMUSG00000050947	Amigo1	adhesion molecule with Ig like domain 1	11.84318306	10.22192406	12.12549213	12.05273926	11.66071584	11.71177025	11.80180696	11.66374363	11.56083463	11.70950917	0.148674541	0.961602412	0.9978586
ENSMUSG00000050944	Efcab5	EF-hand calcium binding domain 5	6.703810928	6.377641345	7.243947459	6.603563095	6.530463521	6.649417076	7.082145807	7.086342355	6.732240707	6.83709219	0.104851483	0.719043501	0.972949586
ENSMUSG00000050945	Zfp438	zinc finger protein 438	7.176812797	6.815569122	7.078294575	7.068921493	7.176853888	7.063862271	6.98421512	7.22670701	7.034899497	7.112909572	0.078010076	0.636743844	0.969741274
ENSMUSG00000102275	Gm37144	predicted gene, 37144	4.730353856	4.656706109	4.385735942	4.469424261	3.813834889	3.84427012	4.902110306	4.796001121	4.560555042	4.339054109	-0.221500933	0.694979871	0.96988229
ENSMUSG00000100799	1700027H10Rik	RIKEN cDNA 1700027H10 gene	2.66033993	0	2.41333609	1.639366891	2.590779194	1.809634363	3.30634127	0	1.678260728	1.926688707	0.248427979	0.68777647	0.969741274
ENSMUSG00000100795	Gm29208	predicted gene 29208	0	2.64754811	0	0	0	0	0	0	0.661887028	0	-0.661887028	0.405542433	0.925901209
ENSMUSG00000100794	Gm29667	predicted gene 29667	1.645576219	0	1.449333651	0	1.58961773	0.875920088	0	0.994123999	0.773727468	0.864915454	0.091187987	0.993871799	0.998530288
ENSMUSG00000062713	Sim2	single-minded homolog 2 (Drosophila)	1.645576219	0	1.846484642	0	0	0	2.713220414	3.574171483	0.873015215	1.571847974	0.698832759	0.27921363	0.826609078
ENSMUSG00000106560	Gm43119	predicted gene 43119	1.645576219	2.64754811	2.41333609	0	0	2.941373951	0	0	1.676615105	0.735343488	-0.941271617	0.641788005	0.969741274
ENSMUSG00000106561	AC151967.1	---	1.04569736	1.037876205	0.899492338	1.040994419	1.003492829	0.875920088	1.078314528	0.994123999	1.00601508	0.987962861	-0.018052219	0.981393144	0.9978586
ENSMUSG00000106563	Mir6962	microRNA 6962	1.04569736	1.037876205	0.899492338	1.040994419	1.003492829	0.875920088	1.078314528	0.994123999	1.00601508	0.987962861	-0.018052219	0.981393144	0.9978586
ENSMUSG00000106565	Gm43582	predicted gene 43582	3.250190284	3.236588011	2.630511888	2.386971434	1.003492829	2.941373951	3.30634127	1.991176999	2.876065404	2.310596262	-0.565469142	0.571885153	0.969741274
ENSMUSG00000106566	Gm43836	predicted gene 43836	0	0	0	0	1.58961773	0	0	0	0	0.397404432	0.397404432	0.678492791	0.969741274
ENSMUSG00000106567	2010309G21Rik	RIKEN cDNA 2010309G21 gene	0	0	1.449333651	0	0	0	0	0	0.362333413	0	-0.362333413	0.692015925	0.969741274
ENSMUSG00000053411	Cbx7	chromobox 7	10.8924591	11.11777615	10.95834314	11.29027625	11.13883108	11.09009898	11.09723446	11.00364473	11.06471366	11.08245231	0.017738654	0.91377904	0.994763903
ENSMUSG00000002342	Tmem161a	transmembrane protein 161A	8.877696751	8.963372891	9.032616941	9.481619201	9.235784313	9.409390519	9.582838544	8.836872556	9.088826446	9.266221483	0.177395037	0.282580023	0.831255721
ENSMUSG00000002341	Ncan	neurocan	13.09174098	13.12734287	13.28632982	13.17739757	13.15306776	13.32467178	13.3800463	13.2940019	13.17070281	13.28794693	0.117244127	0.141813505	0.614853986
ENSMUSG00000053414	Hunk	hormonally upregulated Neu-associated kinase	9.014624568	9.110818192	9.382332829	9.321517445	9.161783121	8.841336656	9.260857975	9.323632625	9.207323258	9.146902594	-0.060420664	0.653314389	0.969741274
ENSMUSG00000002345	Borcs8	BLOC-1 related complex subunit 8	8.674726876	8.55435951	8.492433766	8.639068214	8.494797868	8.512296648	8.522845736	8.447689176	8.590147092	8.494407357	-0.095739734	0.344734487	0.887270183
ENSMUSG00000091390	Gm17168	predicted gene 17168	3.667665513	4.24065392	3.80541029	3.882583475	4.328557257	4.145967774	3.949570471	3.574171483	3.8990783	3.999566746	0.100488447	0.775011591	0.973353259
ENSMUSG00000091393	5330438I03Rik	RIKEN cDNA 5330438I03 gene	4.545452185	6.073644229	6.098072895	5.538499508	5.176708868	5.300789739	5.98294324	5.4803398	5.563917204	5.485195411	-0.078721793	0.612581205	0.969741274
ENSMUSG00000071528	Usmg5	upregulated during skeletal muscle growth 5	10.11088756	10.15153152	10.36903046	10.15090389	10.70654549	10.31019871	10.35214507	10.33585441	10.19558835	10.42618592	0.230597569	0.033683816	0.290827001
ENSMUSG00000055811	Cldn17	claudin 17	2.394364844	0	0	0	0	1.417032207	0	0	0.598591211	0.354258052	-0.244333159	0.705641423	0.96988229
ENSMUSG00000055817	Mta3	metastasis associated 3	11.25423201	11.37567901	11.63347331	11.41677423	10.81352296	11.14699715	11.10671919	11.24561664	11.42003964	11.07821398	-0.341825656	0.002467162	0.053354864
ENSMUSG00000102131	Gm21160	predicted gene, 21160	0	0	0	0	1.003492829	0	0	0	0	0.250873207	0.250873207	0.846512451	0.973353259
ENSMUSG00000060419	Rps16-ps2	ribosomal protein S16, pseudogene 2	8.014445023	8.640645136	8.346640255	8.70270832	8.946542261	8.413278808	8.414218964	8.472072772	8.426109684	8.561528201	0.135418518	0.461587269	0.956861716
ENSMUSG00000108092	Gm44189	predicted gene, 44189	3.079044871	3.236588011	1.846484642	3.394899473	1.58961773	1.417032207	0	1.577122502	2.889254249	1.14594311	-1.743311139	0.018271751	0.197773576
ENSMUSG00000108093	Gm44102	predicted gene, 44102	0	0	0	0	0	0	0	2.575155827	0	0.643788957	0.643788957	0.425793562	0.93752711
ENSMUSG00000108090	Gm6637	predicted gene 6637	0	0	0	0	0	0	1.688464829	1.577122502	0	0.816396833	0.816396833	0.469797616	0.959229683
ENSMUSG00000055818	A230083G16Rik	RIKEN cDNA A230083G16 gene	6.564744433	5.980458848	5.903227351	5.886806183	6.576759562	6.251075793	6.03278254	5.965691564	6.083809204	6.206577365	0.122768161	0.62811264	0.969741274
ENSMUSG00000108096	Minpp1-ps	multiple inositol polyphosphate histidine phosphatase 1, pseudogene	0	0	0.899492338	0	0	0	1.078314528	0	0.224873085	0.269578632	0.044705548	0.991579818	0.9978586
ENSMUSG00000108095	Gm44067	predicted gene, 44067	2.068014459	0	1.449333651	1.639366891	0	0	2.713220414	3.159462173	1.28917875	1.468170647	0.178991896	0.522746842	0.965516704
ENSMUSG00000014686	Ceacam16	carcinoembryonic antigen-related cell adhesion molecule 16	3.667665513	2.05644782	2.986096998	1.639366891	2.32751257	3.348651568	2.713220414	2.312514971	2.587394306	2.675474881	0.088080575	0.933503655	0.9978586
ENSMUSG00000107216	2210412B16Rik	RIKEN cDNA 2210412B16 gene	5.04137088	4.318870111	3.394994784	3.533121572	4.328557257	4.557643452	4.231515646	4.895508649	4.072089337	4.503306251	0.431216914	0.471128723	0.95999765
ENSMUSG00000107219	Gm42738	predicted gene 42738	5.445414159	4.879533179	5.154468919	6.0103038	5.707283082	5.418153019	4.392881974	5.414763677	5.372430014	5.233270438	-0.139159576	0.731177114	0.973353259
ENSMUSG00000115081	---	---	1.645576219	0	0	0	0	0	0	2.312514971	0.411394055	0.578128743	0.166734688	0.767977768	0.973353259
ENSMUSG00000111218	AC145736.2	---	0	0	0	1.639366891	0	0	0	0	0.409841723	0	-0.409841723	0.662772563	0.969741274
ENSMUSG00000073759	4933407E24Rik	RIKEN cDNA 4933407E24 gene	0	0	0	0	1.58961773	0	0	0	0	0.397404432	0.397404432	0.678492791	0.969741274
ENSMUSG00000099858	Gm6652	predicted gene 6652	4.333320076	4.393062975	4.96759891	4.398847215	4.466092426	4.145967774	4.467265589	4.076382183	4.523207294	4.288926993	-0.234280301	0.459435818	0.956861716
ENSMUSG00000040775	Gm9772	predicted gene 9772	2.66033993	3.06564474	3.892055946	4.246406016	3.006106913	3.348651568	3.134381001	1.577122502	3.466111658	2.766565496	-0.699546162	0.227449493	0.755325407
ENSMUSG00000032633	Flcn	folliculin	10.7009606	10.87321428	10.73188257	10.98544969	10.68204789	10.44249938	10.65433318	10.33141878	10.82287679	10.52757481	-0.295301979	0.005622821	0.093188338
ENSMUSG00000115084	---	---	0	0	0	0	3.006106913	0	0	0	0	0.751526728	0.751526728	0.334498591	0.877914407
ENSMUSG00000113614	AC126554.6	---	1.04569736	0	0	0	0	0	0	0	0.26142434	0	-0.26142434	0.830018289	0.973353259
ENSMUSG00000113617	CT485612.7	---	0	0	0	0	0	0.875920088	0	0	0	0.218980022	0.218980022	0.846512451	0.973353259
ENSMUSG00000113610	AC125409.3	---	0	2.64754811	0	0	0	0	0	0	0.661887028	0	-0.661887028	0.405542433	0.925901209
ENSMUSG00000113611	AC162801.3	---	1.645576219	0	0	0	0	0	0	0.994123999	0.411394055	0.248531	-0.162863055	0.816860842	0.973353259
ENSMUSG00000113613	AC124516.2	---	2.394364844	2.64754811	2.819232083	0	2.005236078	3.090278098	0	1.991176999	1.965286259	1.771672794	-0.193613466	0.864370042	0.977320391
ENSMUSG00000037035	Inhbb	inhibin beta-B	6.984076035	7.919956556	8.335088022	7.564232514	7.741654165	7.555201841	8.500879772	7.919009763	7.700838281	7.929186385	0.228348104	0.47504704	0.962049416
ENSMUSG00000037034	Pax1	paired box 1	2.66033993	0	0	0	0	0	0	3.311334	0.665084982	0.8278335	0.162748517	0.751814867	0.973353259
ENSMUSG00000113619	AC154635.1	---	2.394364844	0	0	0	0	1.417032207	2.713220414	0	0.598591211	1.032563155	0.433971944	0.72468807	0.973353259
ENSMUSG00000037032	Apbb1	amyloid beta (A4) precursor protein-binding, family B, member 1	12.62452295	12.93489063	13.03331218	13.14373627	13.0693599	12.93016522	13.04151024	12.77367811	12.93411551	12.95367837	0.01956286	0.921378913	0.996895631
ENSMUSG00000020923	Ubtf	upstream binding transcription factor, RNA polymerase I	11.91850081	11.86348114	11.83487706	11.71155345	11.62627797	11.92199052	11.75524817	11.66286125	11.83210312	11.74159448	-0.090508639	0.318127102	0.862098848
ENSMUSG00000020922	Lsm12	LSM12 homolog	10.03973008	9.788942157	9.974042226	9.865401779	9.709141553	9.791633066	9.99949598	9.72463976	9.917029061	9.80622759	-0.110801471	0.267607289	0.810900386
ENSMUSG00000020921	Tmem101	transmembrane protein 101	8.577588585	8.722060075	9.120478625	8.767165749	8.7981244	8.993287907	8.687480886	8.685219985	8.796823258	8.791028294	-0.005794964	0.912359778	0.994146382
ENSMUSG00000014602	Kif1a	kinesin family member 1A	15.4596891	15.6302997	15.69024878	15.62506426	15.32897559	15.52597088	15.40522064	15.52301343	15.60132546	15.44579513	-0.155530327	0.097596527	0.515888288
ENSMUSG00000020926	Adam11	a disintegrin and metallopeptidase domain 11	12.36318677	12.46171004	11.72372696	12.7421767	12.11222942	12.388333	12.25814419	12.11525365	12.32270012	12.21849007	-0.104210051	0.383302559	0.915109774
ENSMUSG00000020925	Ccdc43	coiled-coil domain containing 43	9.361313439	8.923248246	9.160300659	9.122366026	8.96985928	9.078217693	9.050137721	9.059708307	9.141807092	9.03948075	-0.102326342	0.317291075	0.860925682
ENSMUSG00000014606	Slc25a11	solute carrier family 25 (mitochondrial carrier oxoglutarate carrier), member 11	10.84566328	10.91394741	10.97828434	10.89138394	11.08178446	11.04119314	10.83988373	10.85009266	10.90731974	10.9532385	0.045918756	0.555172772	0.965516704
ENSMUSG00000014609	Chrne	cholinergic receptor, nicotinic, epsilon polypeptide	0	0	1.449333651	0	3.465775941	0	3.30634127	0	0.362333413	1.693029303	1.33069589	0.082917725	0.476461582
ENSMUSG00000020929	Eftud2	elongation factor Tu GTP binding domain containing 2	11.398865	11.37682221	11.53635401	11.43947735	11.37165644	11.47664118	11.3117732	11.15690122	11.43787964	11.32924301	-0.108636632	0.221585604	0.748407494
ENSMUSG00000020928	Higd1b	HIG1 domain family, member 1B	5.297085122	5.627820819	4.705805117	6.056887344	6.029237949	5.418153019	5.318492948	5.543064376	5.421899601	5.577237073	0.155337472	0.736128203	0.973353259
ENSMUSG00000099717	Gm9451	predicted gene 9451	0	0	2.41333609	0	0	0	0	0	0.603334022	0	-0.603334022	0.451269301	0.955408935
ENSMUSG00000101111	Gm28437	predicted gene 28437	16.96835316	16.2855489	16.29560893	16.27745717	16.5887956	16.52493373	16.72038709	16.96096831	16.45674204	16.69877118	0.242029144	0.231440015	0.761526159
ENSMUSG00000072553	Gm525	predicted gene 525	0	0	0	0	0	2.117931851	0	0	0	0.529482963	0.529482963	0.52690629	0.965516704
ENSMUSG00000030022	Adamts9	a disintegrin-like and metallopeptidase (reprolysin type) with thrombospondin type 1 motif, 9	6.41082874	6.688749398	5.410736395	6.209015353	6.136160803	5.914029771	5.396707736	7.319214285	6.179832472	6.191528149	0.011695677	0.733714442	0.973353259
ENSMUSG00000030020	Prickle2	prickle planar cell polarity protein 2	12.86414847	12.95837167	13.07195815	12.84281146	12.64789887	12.71836526	12.68687434	12.71081982	12.93432244	12.69098957	-0.243332866	0.000876588	0.025556791
ENSMUSG00000045506	A930002H24Rik	RIKEN cDNA A930002H24 gene	0	0	3.135647341	2.386971434	2.813337462	0	2.115933218	2.575155827	1.380654694	1.876106627	0.495451933	0.867224534	0.978014552
ENSMUSG00000104549	Gm43142	predicted gene 43142	0	0	2.157573411	0	0	0	0	0	0.539393353	0	-0.539393353	0.510566838	0.965516704
ENSMUSG00000030029	Lrig1	leucine-rich repeats and immunoglobulin-like domains 1	9.914854136	10.11363311	9.830587049	10.46125816	9.698712326	10.1066937	9.994788464	9.932215885	10.08008312	9.933102593	-0.146980523	0.260020292	0.799439437
ENSMUSG00000091736	Yy2	Yy2 transcription factor	3.891101417	5.688005168	3.135647341	3.882583475	4.398963161	0.875920088	4.231515646	4.236773674	4.14933435	3.435793142	-0.713541208	0.391569578	0.922768618
ENSMUSG00000063145	Bbs5	Bardet-Biedl syndrome 5 (human)	8.442871591	8.022855549	8.095945404	8.333263688	8.292357133	8.167247981	8.174406638	8.459932488	8.223734058	8.27348606	0.049752002	0.737687944	0.973353259
ENSMUSG00000109320	Gm44679	predicted gene 44679	1.645576219	0	0	0	0	0	0	0	0.411394055	0	-0.411394055	0.662772563	0.969741274
ENSMUSG00000109326	Gm9165	predicted gene 9165	0	0	1.449333651	0	0	0	0	0	0.362333413	0	-0.362333413	0.692015925	0.969741274
ENSMUSG00000063142	Kcnma1	potassium large conductance calcium-activated channel, subfamily M, alpha member 1	13.14254937	13.10406191	13.23739503	12.95755442	12.61314995	12.85701913	12.36414949	12.90017918	13.11039018	12.68362444	-0.426765744	0.000585365	0.018930937
ENSMUSG00000109324	Prmt1	protein arginine N-methyltransferase 1	10.08567329	10.21682596	10.43364689	10.18144681	10.50482425	10.57872737	10.559757	10.27825226	10.22939824	10.48039022	0.25099198	0.016422076	0.184398481
ENSMUSG00000048070	Pirt	phosphoinositide-interacting regulator of transient receptor potential channels	3.079044871	3.389405204	3.135647341	0	2.005236078	2.37180711	3.134381001	2.575155827	2.401024354	2.521645004	0.12062065	0.694998081	0.96988229
ENSMUSG00000048076	Arf1	ADP-ribosylation factor 1	13.17362706	13.31079004	13.50249314	13.30665782	13.36905736	13.40950566	13.3411692	13.10862519	13.32339202	13.30708935	-0.016302662	0.866681695	0.977716194
ENSMUSG00000039501	Znfx1	zinc finger, NFX1-type containing 1	11.80506965	11.89613866	11.97637833	12.05811651	11.51328241	11.83462854	11.6746377	11.51619361	11.93392578	11.63468557	-0.299240218	0.002091537	0.047382437
ENSMUSG00000090427	Gm17225	predicted gene 17225	0	0	1.449333651	0	0	0	0	0	0.362333413	0	-0.362333413	0.692015925	0.969741274
ENSMUSG00000048078	Tenm4	teneurin transmembrane protein 4	11.76150591	11.6954383	11.76879036	11.65163468	11.64812364	11.31626093	11.44658451	11.553806	11.71934231	11.49119377	-0.22814854	0.009324208	0.130253273
ENSMUSG00000039509	Nup133	nucleoporin 133	9.944765752	10.15420083	10.08625417	9.974074933	9.933266064	10.18640929	10.03355626	10.04893097	10.03982392	10.05054065	0.010716726	0.89814051	0.988097987
ENSMUSG00000039508	Fam26d	family with sequence similarity 26, member D	0	0	0	2.061062922	0	1.809634363	0	0	0.51526573	0.452408591	-0.06285714	0.925876612	0.9978586
ENSMUSG00000103276	Gm37917	predicted gene, 37917	0	0	0.899492338	0	0	0	0	0	0.224873085	0	-0.224873085	0.830018289	0.973353259
ENSMUSG00000115615	---	---	0	0	0	1.040994419	0	0	0	1.577122502	0.260248605	0.394280625	0.134032021	0.836646014	0.973353259
ENSMUSG00000115610	---	---	3.403168963	3.236588011	0	1.040994419	3.913403719	4.212471312	4.049800494	3.689572954	1.920187849	3.96631212	2.046124271	0.024265345	0.236792977
ENSMUSG00000115611	---	---	0	0	2.819232083	0	0	0	0	0	0.704808021	0	-0.704808021	0.369378873	0.906718921
ENSMUSG00000104896	Rnu3b4	U3B small nuclear RNA 4	1.04569736	0	0	0	1.58961773	0	1.078314528	0.994123999	0.26142434	0.915514064	0.654089724	0.487635569	0.965516704
ENSMUSG00000104897	Gm43203	predicted gene 43203	3.403168963	2.8716894	2.157573411	2.652653363	2.32751257	3.348651568	3.134381001	3.448730115	2.771271284	3.064818814	0.293547529	0.594633019	0.969741274
ENSMUSG00000104890	Mir3084-1	microRNA 3084-1	0	1.635246308	0	1.040994419	0	0	0	0.994123999	0.669060182	0.248531	-0.420529182	0.653469069	0.969741274
ENSMUSG00000104891	2510017J16Rik	RIKEN cDNA 2510017J16 gene	6.065886046	5.201982679	5.410736395	5.834286707	5.734766344	5.389695085	5.904799339	5.846408813	5.628222957	5.718917395	0.090694439	0.814919282	0.973353259
ENSMUSG00000111107	CT025619.3	---	0	0	0	2.652653363	0	0	0	0	0.663163341	0	-0.663163341	0.404587287	0.925901209
ENSMUSG00000111104	AC151843.2	---	0	0	0	0	1.003492829	0.875920088	0	0	0	0.469853229	0.469853229	0.698136627	0.96988229
ENSMUSG00000111103	AC165442.1	---	0	0	0	0	2.005236078	0	0	0	0	0.50130902	0.50130902	0.561529182	0.965516704
ENSMUSG00000111100	CT010488.2	---	0	0	0	0	0	0	0	1.991176999	0	0.49779425	0.49779425	0.56486706	0.965516704
ENSMUSG00000102498	Gm19445	predicted gene, 19445	0	2.64754811	2.986096998	2.652653363	0	2.117931851	2.939114924	3.574171483	2.071574618	2.157804565	0.086229947	0.813294885	0.973353259
ENSMUSG00000073209	Klf14	Kruppel-like factor 14	4.944961085	3.653659897	4.705805117	4.662538529	4.006542134	4.451504748	4.954769966	3.796423229	4.491741157	4.302310019	-0.189431138	0.618803701	0.969741274
ENSMUSG00000021322	Aoah	acyloxyacyl hydrolase	0	3.06564474	1.846484642	3.070993449	2.005236078	4.212471312	2.939114924	2.989701238	1.995780708	3.036630888	1.040850181	0.244904406	0.780216136
ENSMUSG00000102493	Gm8010	predicted gene 8010	2.068014459	0	0	2.876933903	3.176128642	2.587621499	3.459970513	4.310743152	1.23623709	3.383615951	2.147378861	0.019927369	0.209168568
ENSMUSG00000021326	Trim27	tripartite motif-containing 27	9.237042637	8.61374629	9.417447624	9.225375399	8.989957042	9.100338655	9.169124585	9.051641149	9.123402987	9.077765358	-0.04563763	0.620164939	0.969741274
ENSMUSG00000021327	Zkscan3	zinc finger with KRAB and SCAN domains 3	11.7174979	11.73252588	11.20251846	11.81215199	11.57588109	11.53058468	11.08178002	11.72842981	11.61617356	11.4791689	-0.137004658	0.365879376	0.905902412
ENSMUSG00000102496	Gm36989	predicted gene, 36989	6.703810928	6.932135999	6.837547697	6.571835231	6.072962523	6.118621465	6.417500623	6.743220948	6.761332464	6.33807639	-0.423256074	0.050054835	0.359507986
ENSMUSG00000022781	Pak2	p21 protein (Cdc42/Rac)-activated kinase 2	10.69634084	10.64838277	10.54730671	10.60436463	10.63996804	10.73606238	10.5818976	10.52447914	10.62409874	10.62060179	-0.003496946	0.985908218	0.9978586
ENSMUSG00000022780	Meltf	melanotransferrin	5.087262684	5.160101171	4.705805117	4.662538529	4.466092426	4.65650582	4.605430475	5.414763677	4.903926875	4.7856981	-0.118228776	0.80779347	0.973353259
ENSMUSG00000022783	Spag6l	sperm associated antigen 6-like	6.531931948	7.213817794	7.202164959	6.780539531	7.18683831	6.457110348	6.736049215	6.688777375	6.932113558	6.767193812	-0.164919746	0.435924682	0.944843881
ENSMUSG00000031089	Slc6a14	solute carrier family 6 (neurotransmitter transporter), member 14	0	0	0	0	1.58961773	0	0	0	0	0.397404432	0.397404432	0.678492791	0.969741274
ENSMUSG00000022787	Wdr53	WD repeat domain 53	7.644116309	7.659366278	7.300481718	7.59612618	7.466369293	7.413976133	7.75918341	7.168214601	7.550022621	7.451935859	-0.098086762	0.586259051	0.969741274
ENSMUSG00000022789	Dnm1l	dynamin 1-like	12.47664615	12.53752836	12.50444503	12.17260401	12.04623736	12.28492645	12.46403189	12.59092473	12.42280589	12.34653011	-0.076275779	0.577454624	0.969741274
ENSMUSG00000022788	Fgd4	FYVE, RhoGEF and PH domain containing 4	9.609508976	9.55849739	9.629327922	9.29989267	9.514762302	9.603098946	9.794466318	9.910077094	9.524306739	9.705601165	0.181294426	0.118893481	0.567700811
ENSMUSG00000031085	Gm498	predicted gene 498	0	0	0	0	0	0	2.115933218	0	0	0.528983305	0.528983305	0.535790408	0.965516704
ENSMUSG00000097686	Gm26647	predicted gene, 26647	0	2.05644782	2.819232083	2.386971434	3.328209112	2.941373951	0	2.797267076	1.815662834	2.266712535	0.4510497	0.505393785	0.965516704
ENSMUSG00000106675	Gm43798	predicted gene 43798	0	0	0	0	0	0	0	0.994123999	0	0.248531	0.248531	0.846512451	0.973353259
ENSMUSG00000023781	Hes7	hairy and enhancer of split 7 (Drosophila)	4.407550957	4.070221307	4.1944172	5.207890725	3.328209112	3.348651568	4.14351718	5.197996871	4.470020047	4.004593683	-0.465426364	0.502941596	0.965516704
ENSMUSG00000070953	Rabepk	Rab9 effector protein with kelch motifs	9.195741752	9.094233702	8.910799357	9.080702502	8.949477581	8.923040117	9.193980224	9.016152615	9.070369328	9.020662634	-0.049706694	0.643075637	0.969741274
ENSMUSG00000028809	Srrm1	serine/arginine repetitive matrix 1	12.20988577	11.74275954	11.76413148	11.84570508	11.86495634	11.82270318	11.96833924	12.14272825	11.89062047	11.94968175	0.059061285	0.660960862	0.969741274
ENSMUSG00000028800	Hdac1	histone deacetylase 1	9.27966675	9.303480623	9.287620552	9.37074932	9.658020257	9.210199138	9.402656493	9.584429	9.310379311	9.463826222	0.153446911	0.146124193	0.623909193
ENSMUSG00000028801	Stpg1	sperm tail PG rich repeat containing 1	5.174886192	3.06564474	3.135647341	3.070993449	6.310669862	4.451504748	4.731512262	5.688891056	3.611792931	5.295644482	1.683851552	0.004594705	0.080280356
ENSMUSG00000028803	Nipal3	NIPA-like domain containing 3	11.40737001	11.57908076	11.69690029	11.33703263	11.71562798	11.86466403	11.43156773	11.44458259	11.50509592	11.61411058	0.109014658	0.339318681	0.881116198
ENSMUSG00000028804	Csmd2	CUB and Sushi multiple domains 2	11.47041993	12.00845543	11.88261098	11.71926734	11.47254117	11.61636474	11.71288075	11.8811493	11.77018842	11.67073399	-0.099454427	0.394603642	0.925901209
ENSMUSG00000028807	Zbtb8a	zinc finger and BTB domain containing 8a	8.299150184	7.659366278	7.681144448	7.913401184	7.871133494	7.906054428	7.751762109	7.24568909	7.888265524	7.69365978	-0.194605743	0.310539239	0.85710441
ENSMUSG00000114057	AC121583.2	---	0	0	0	0	1.58961773	0	1.078314528	0	0	0.666983065	0.666983065	0.552691118	0.965516704
ENSMUSG00000114056	AC148334.3	---	0	0	0.899492338	0	2.32751257	2.117931851	1.078314528	1.991176999	0.224873085	1.878733987	1.653860902	0.049276964	0.356814083
ENSMUSG00000114051	AC134328.1	---	1.04569736	0	1.449333651	1.639366891	0	3.090278098	0	0	1.033599476	0.772569525	-0.261029951	0.738050765	0.973353259
ENSMUSG00000114050	AC055772.2	---	2.068014459	2.382061721	1.846484642	3.394899473	2.813337462	1.809634363	0	2.797267076	2.422865074	1.855059725	-0.567805348	0.655467874	0.969741274
ENSMUSG00000022439	Parvg	parvin, gamma	6.922116114	6.842298964	6.781905104	6.766592996	7.216383558	7.288572001	7.270494816	7.602994137	6.828228294	7.344611128	0.516382834	0.001127775	0.030473378
ENSMUSG00000022438	Parvb	parvin, beta	9.438585927	9.65022713	9.122720034	9.548350572	9.61799312	9.573357972	9.619996878	9.714456086	9.439970916	9.631451014	0.191480098	0.123840905	0.577536573
ENSMUSG00000022433	Csnk1e	casein kinase 1, epsilon	11.95027918	11.69360453	11.86965749	12.04192426	11.84065606	11.78734699	11.85602349	11.74686702	11.88886636	11.80772339	-0.081142972	0.319085223	0.863079427
ENSMUSG00000022432	Smc1b	structural maintenance of chromosomes 1B	1.645576219	1.635246308	0	1.639366891	0	0	0	0	1.230047354	0	-1.230047354	0.213221718	0.736545333
ENSMUSG00000011958	Bnip2	BCL2/adenovirus E1B interacting protein 2	9.08417395	9.244581873	8.789073292	9.280394699	9.070359294	8.81214728	9.284194688	9.296581647	9.099555953	9.115820727	0.016264774	0.90813215	0.991808199
ENSMUSG00000022437	Samm50	SAMM50 sorting and assembly machinery component	11.34321243	11.57111266	11.6553141	11.74350021	11.55820251	11.51749223	11.48065344	11.39655806	11.57828485	11.48822656	-0.09005829	0.309198364	0.856775868
ENSMUSG00000022436	Sh3bp1	SH3-domain binding protein 1	9.946322999	9.857698886	9.763221809	10.34523476	9.283090402	9.440937687	9.332255275	8.999474137	9.978119613	9.263939375	-0.714180238	3.11E-07	5.14E-05
ENSMUSG00000022434	Fam118a	family with sequence similarity 118, member A	7.498869241	8.652021436	8.403053318	8.393491752	8.264342319	8.48901063	8.586805528	8.523531214	8.236858937	8.465922423	0.229063486	0.384528924	0.916597958
ENSMUSG00000106516	Gm42441	predicted gene 42441	0	2.05644782	0	0	0	0	0	0	0.514111955	0	-0.514111955	0.541846636	0.965516704
ENSMUSG00000036854	Hspb6	heat shock protein, alpha-crystallin-related, B6	7.228924066	7.05148481	7.159136195	7.080241645	6.707350013	7.036588885	6.932638589	7.148177988	7.129946679	6.956188869	-0.17375781	0.308735298	0.856494935
ENSMUSG00000042737	Dpm3	dolichyl-phosphate mannosyltransferase polypeptide 3	7.111688149	7.172283428	7.11478453	6.794352535	7.48267155	6.980444842	6.919451112	7.207471842	7.04827716	7.147509837	0.099232676	0.548999171	0.965516704
ENSMUSG00000036856	Wnt4	wingless-type MMTV integration site family, member 4	8.79368593	9.500942225	9.691046642	9.69178033	8.530520265	9.183508315	9.284194688	9.2897389	9.419363782	9.071990542	-0.34737324	0.073866941	0.448697836
ENSMUSG00000036850	Mrpl41	mitochondrial ribosomal protein L41	9.311432566	9.305883315	9.397222309	9.040700116	9.287736803	9.197941626	9.115201657	9.397632291	9.263809577	9.249628094	-0.014181482	0.876888566	0.981082476
ENSMUSG00000025789	St8sia2	ST8 alpha-N-acetyl-neuraminide alpha-2,8-sialyltransferase 2	7.659387952	7.423064381	6.781905104	6.229495289	8.606872126	8.089757053	7.91347965	8.173139942	7.023463181	8.195812193	1.172349011	2.44E-05	0.001734746
ENSMUSG00000025784	Clec3b	C-type lectin domain family 3, member b	5.04137088	4.715721513	4.752870796	3.882583475	5.094235333	4.703507358	4.847455465	5.414763677	4.598136666	5.014990458	0.416853792	0.263444187	0.80476004
ENSMUSG00000025785	Exosc7	exosome component 7	8.332877613	8.264358356	8.384492988	8.017173045	8.498810985	8.333350256	8.505299802	8.354582011	8.2497255	8.423010764	0.173285263	0.172366195	0.673101169
ENSMUSG00000025786	Zdhhc3	zinc finger, DHHC domain containing 3	10.56667657	10.78468527	10.76167253	11.0342854	10.61707483	10.66288688	10.76721336	10.71018458	10.78682994	10.68933991	-0.097490028	0.300203208	0.849417842
ENSMUSG00000025787	Tgm4	transglutaminase 4 (prostate)	3.403168963	5.116967398	4.798449417	4.469424261	3.813834889	4.145967774	4.467265589	4.236773674	4.44700251	4.165960481	-0.281042028	0.335439695	0.8786441
ENSMUSG00000025780	Itih5	inter-alpha (globulin) inhibitor H5	10.27479198	10.0956932	10.06076329	10.23560522	10.16178923	10.11758039	10.01197477	10.50688518	10.16671342	10.19955739	0.032843973	0.711253309	0.970339041
ENSMUSG00000025781	Atp5c1	ATP synthase, H+ transporting, mitochondrial F1 complex, gamma polypeptide 1	11.73336959	11.51821885	11.86832233	11.43837813	11.57255306	11.64222838	11.66133134	11.61073717	11.63957222	11.62171249	-0.017859734	0.779696963	0.973353259
ENSMUSG00000012609	Ttll5	tubulin tyrosine ligase-like family, member 5	10.32114018	10.03471216	10.18071562	10.16293259	9.79975967	10.14869503	9.915641592	10.12650626	10.17487514	9.997650638	-0.177224501	0.103420484	0.530838643
ENSMUSG00000049858	Suox	sulfite oxidase	8.269599809	7.842633384	7.986977219	8.41600298	8.073040442	8.071956619	8.38573439	8.484111747	8.128803348	8.2537108	0.124907452	0.460396369	0.956861716
ENSMUSG00000035506	Slc12a8	solute carrier family 12 (potassium/chloride transporters), member 8	5.04137088	4.715721513	4.385735942	5.166004367	3.813834889	4.212471312	5.054651607	4.076382183	4.827208176	4.289334998	-0.537873178	0.188940549	0.698434547
ENSMUSG00000035505	Cox18	cytochrome c oxidase assembly protein 18	8.229233536	8.239436375	8.259694023	8.375226395	8.591921598	8.544923631	8.491998878	8.678250568	8.275897582	8.576773669	0.300876086	0.00444954	0.078642637
ENSMUSG00000035504	Reep6	receptor accessory protein 6	8.762203083	8.074498693	8.327334819	7.957038392	8.412098154	8.528702371	8.455918305	8.414523094	8.280268747	8.452810481	0.172541734	0.399589577	0.925901209
ENSMUSG00000020493	Prr11	proline rich 11	3.991054272	4.318870111	2.41333609	4.324639127	4.913635787	4.002991028	4.14351718	5.4803398	3.7619749	4.635120949	0.873146049	0.084419219	0.48089271
ENSMUSG00000020492	Ska2	spindle and kinetochore associated complex subunit 2	8.084002856	7.855811812	7.316235645	7.43792855	7.761832501	7.895972567	8.623863128	7.814824542	7.673494716	8.024123185	0.350628469	0.105321521	0.534902616
ENSMUSG00000020491	2810021J22Rik	RIKEN cDNA 2810021J22 gene	8.284450655	7.621288085	8.001665973	7.887859932	8.278417725	8.306960874	8.478574184	8.048964183	7.948816161	8.278229241	0.32941308	0.045499532	0.343126981
ENSMUSG00000020490	Btnl10	butyrophilin-like 10	0	0	1.846484642	0	0	0	2.115933218	0	0.46162116	0.528983305	0.067362144	0.922845886	0.997175098
ENSMUSG00000020496	Rnf187	ring finger protein 187	13.2346402	13.25748027	13.40652751	13.39811966	13.23399069	13.41039128	13.39857924	13.26304007	13.32419191	13.32650032	0.002308411	0.977397311	0.9978586
ENSMUSG00000020495	Smg8	smg-8 homolog, nonsense mediated mRNA decay factor (C. elegans)	8.715479546	8.910674277	9.034998981	8.878340902	8.703927977	9.058014611	8.663951745	8.642889335	8.884873426	8.767195917	-0.117677509	0.385402435	0.917310099
ENSMUSG00000042087	4933440N22Rik	RIKEN cDNA 4933440N22 gene	2.394364844	1.037876205	2.157573411	2.061062922	3.706881428	3.567705506	1.078314528	1.991176999	1.912719345	2.586019615	0.67330027	0.188526495	0.697778455
ENSMUSG00000033904	Ccp110	centriolar coiled coil protein 110	11.06364557	11.25341681	10.73041355	11.01671763	11.10105172	11.08456121	10.43672549	11.21764858	11.01604839	10.95999675	-0.056051638	0.811900319	0.973353259
ENSMUSG00000033906	Zdhhc15	zinc finger, DHHC domain containing 15	7.776068545	7.781793792	8.136440911	7.328266193	8.235772712	8.124712285	8.163261761	8.122692365	7.75564236	8.161609781	0.405967421	0.021003548	0.215990098
ENSMUSG00000033900	Map9	microtubule-associated protein 9	11.9424975	11.91475459	12.09099354	11.86587752	11.55386936	11.89250319	11.77231132	11.59740649	11.95353079	11.70402259	-0.249508201	0.010003775	0.135938905
ENSMUSG00000028378	Ptgr1	prostaglandin reductase 1	4.084528611	5.320791791	4.500498474	5.166004367	5.006759695	4.703507358	3.459970513	4.310743152	4.767955811	4.370245179	-0.397710631	0.37441469	0.910449261
ENSMUSG00000033902	Mapkbp1	mitogen-activated protein kinase binding protein 1	11.35381213	11.22766997	11.32971917	11.42067575	11.28251697	11.4042463	11.33926703	11.22603634	11.33296926	11.31301666	-0.019952594	0.791615656	0.973353259
ENSMUSG00000033909	Usp36	ubiquitin specific peptidase 36	10.38683844	10.39665456	10.47458585	10.45474949	10.38418252	10.37060255	10.44595213	10.34688417	10.42820708	10.38690534	-0.041301742	0.542931734	0.965516704
ENSMUSG00000028373	Astn2	astrotactin 2	10.58078183	10.38420232	10.42277331	10.80702783	10.16558082	10.66882025	10.22123931	9.824287258	10.54869633	10.21998191	-0.328714414	0.053389223	0.375370922
ENSMUSG00000028370	Pappa	pregnancy-associated plasma protein A	3.667665513	3.389405204	3.394994784	3.882583475	3.706881428	2.775313294	3.725440712	3.574171483	3.583662244	3.445451729	-0.138210515	0.805010914	0.973353259
ENSMUSG00000062704	9430002A10Rik	RIKEN cDNA 9430002A10 gene	2.66033993	2.8716894	2.41333609	1.040994419	2.32751257	3.462332101	3.134381001	0	2.24658996	2.231056418	-0.015533542	0.696657353	0.96988229
ENSMUSG00000083376	Gm11882	predicted gene 11882	0	0	0	2.061062922	0	0	0	0	0.51526573	0	-0.51526573	0.540781741	0.965516704
ENSMUSG00000025262	Fam120c	family with sequence similarity 120, member C	10.28958974	10.55955544	10.45515122	10.25571375	10.4227139	10.53391951	10.226603	10.59925632	10.39000254	10.44562318	0.055620643	0.59184244	0.969741274
ENSMUSG00000020149	Rab1a	RAB1A, member RAS oncogene family	12.50967255	12.34418757	12.57489416	12.31715302	12.26907065	12.47427208	12.43507611	12.33168959	12.43647683	12.37752711	-0.058949718	0.484411056	0.964410959
ENSMUSG00000117509	---	---	0	0	0	0	0	0	0	0.994123999	0	0.248531	0.248531	0.846512451	0.973353259
ENSMUSG00000117505	---	---	3.891101417	3.769606182	4.657152062	4.936123083	5.094235333	4.877550687	4.902110306	4.942801653	4.313495686	4.954174495	0.640678809	0.1151209	0.558713566
ENSMUSG00000117507	---	---	2.394364844	2.05644782	0.899492338	1.040994419	0	0	1.078314528	1.991176999	1.597824855	0.767372882	-0.830451974	0.423939183	0.93752711
ENSMUSG00000020140	Lgr5	leucine rich repeat containing G protein coupled receptor 5	6.934722809	6.28325159	6.770514345	6.346621072	7.883464551	7.624004769	9.041033592	8.565683748	6.583777454	8.278546665	1.694769211	1.38E-10	7.45E-08
ENSMUSG00000020143	Dock2	dedicator of cyto-kinesis 2	7.20830488	7.378102821	7.078294575	6.723925744	7.216383558	7.192992942	7.491551747	7.674781892	7.097157005	7.393927535	0.29677053	0.120148276	0.570794249
ENSMUSG00000018565	Elp5	elongator acetyltransferase complex subunit 5	9.776386233	10.0562786	10.1513751	10.22033773	9.948017749	9.806510562	10.04877632	9.637494869	10.05109441	9.860199875	-0.19089454	0.113746228	0.555462548
ENSMUSG00000018566	Slc2a4	solute carrier family 2 (facilitated glucose transporter), member 4	5.087262684	4.772417384	3.892055946	5.248595212	4.913635787	4.505549955	5.235793501	5.543064376	4.750082807	5.049510905	0.299428098	0.465168106	0.957642267
ENSMUSG00000018567	Gabarap	gamma-aminobutyric acid receptor associated protein	11.26050477	11.01505991	11.1213383	11.00859368	11.25608782	11.11530243	11.16794096	11.1989003	11.10137417	11.18455788	0.083183711	0.325117821	0.869518052
ENSMUSG00000094335	Igkv1-117	immunoglobulin kappa variable 1-117	9.632906455	5.931507328	6.548418315	5.538499508	5.006759695	5.360664488	5.608732751	7.24568909	6.912832901	5.805461506	-1.107371395	0.071853576	0.442949786
ENSMUSG00000018569	Cldn7	claudin 7	1.645576219	2.382061721	2.157573411	0	0	2.117931851	0	0	1.546302838	0.529482963	-1.016819875	0.402887553	0.925901209
ENSMUSG00000086835	Gm11775	predicted gene 11775	1.04569736	0	1.846484642	1.639366891	0	0	0	0.994123999	1.132887223	0.248531	-0.884356224	0.30705628	0.855346438
ENSMUSG00000052403	Fcnaos	ficolin A, opposite strand	3.541470204	3.389405204	3.271140962	3.659250993	3.465775941	2.775313294	4.049800494	4.076382183	3.465316841	3.591817978	0.126501137	0.675177519	0.969741274
ENSMUSG00000086836	Gm13748	predicted gene 13748	0	1.037876205	0	0	0	0	0	0	0.259469051	0	-0.259469051	0.830018289	0.973353259
ENSMUSG00000039086	Ss18l1	SS18, nBAF chromatin remodeling complex subunit like 1	10.7292776	10.66719324	10.83732059	10.7673089	10.52857293	10.61144299	10.63832419	10.55903618	10.75027508	10.58434407	-0.165931008	0.020992896	0.215990098
ENSMUSG00000039087	Rreb1	ras responsive element binding protein 1	9.971013028	9.854419844	9.694064343	10.06662048	9.516742679	9.76833449	9.898941606	10.25150279	9.896529423	9.858880391	-0.037649032	0.895044783	0.987237634
ENSMUSG00000052407	Ccdc171	coiled-coil domain containing 171	6.658928562	7.224017203	7.059697557	6.056887344	7.040347091	6.42941791	6.577175883	6.954102842	6.749882667	6.750260931	0.000378265	0.856460874	0.974479755
ENSMUSG00000052406	Rexo4	REX4, 3-5 exonuclease	10.31873757	10.34151079	10.30434882	10.45583631	10.06225312	10.24913636	10.26360061	10.03672201	10.35510837	10.15292802	-0.202180349	0.022476673	0.226044761
ENSMUSG00000044367	Slc16a13	solute carrier family 16 (monocarboxylic acid transporters), member 13	7.187386724	7.161710274	6.982815326	7.178314101	7.643566866	7.099442832	7.380448881	7.22670701	7.127556606	7.337541397	0.209984791	0.184645166	0.691380517
ENSMUSG00000044365	Cxxc4	CXXC finger 4	9.816106741	8.842800565	10.13147791	9.462281146	9.939184851	9.989503186	10.19958291	10.09937033	9.563166591	10.05691032	0.493743727	0.035585399	0.300976663
ENSMUSG00000039089	L3mbtl3	l(3)mbt-like 3 (Drosophila)	10.14925428	10.12999734	9.992544017	10.11832822	9.691717386	9.902795554	10.12399519	10.11493902	10.09753097	9.958361786	-0.13916918	0.23259058	0.763658846
ENSMUSG00000086839	Gm11973	predicted gene 11973	0	2.64754811	2.157573411	1.040994419	3.176128642	2.941373951	0	0	1.461528985	1.529375648	0.067846663	0.669190826	0.969741274
ENSMUSG00000044362	Ccdc89	coiled-coil domain containing 89	3.991054272	2.64754811	4.500498474	3.882583475	3.591359576	3.66590362	3.134381001	3.796423229	3.755421083	3.547016856	-0.208404226	0.486325776	0.965337603
ENSMUSG00000044361	BC024139	cDNA sequence BC024139	3.541470204	3.653659897	3.394994784	3.242017635	4.530236522	3.66590362	0	4.988593426	3.45803563	3.296183392	-0.161852238	0.333932976	0.877914407
ENSMUSG00000086040	Wipf3	WAS/WASL interacting protein family, member 3	13.04435868	12.80821178	12.80218491	12.63902457	12.51427515	12.64727131	12.4134859	12.4790769	12.82344499	12.51352731	-0.309917673	0.001392424	0.035218847
ENSMUSG00000026609	Ush2a	usherin	0	2.05644782	0	1.639366891	2.005236078	1.809634363	2.115933218	2.575155827	0.923953678	2.126489872	1.202536194	0.250028543	0.786705472
ENSMUSG00000045813	Gm9801	predicted gene 9801	4.730353856	5.201982679	4.96759891	5.122865449	5.094235333	4.877550687	4.31445375	5.688891056	5.005700224	4.993782706	-0.011917517	0.849682667	0.973539468
ENSMUSG00000048814	Lonrf2	LON peptidase N-terminal domain and ring finger 2	12.59131616	12.59244036	12.79745743	12.4436069	12.42113263	12.68178986	12.55451523	12.45123947	12.60620521	12.5271693	-0.079035913	0.400505571	0.925901209
ENSMUSG00000106574	Gm2451	predicted pseudogene 2451	4.841644267	4.879533179	5.082598685	4.985123232	4.398963161	4.835968406	5.148063665	4.632553048	4.947224841	4.75388707	-0.193337771	0.566215541	0.966558309
ENSMUSG00000058447	Gm26920	predicted gene, 26920	6.197251107	4.24065392	4.554628506	4.246406016	0	0	0	0	4.809734888	0	-4.809734888	1.51E-10	8.01E-08
ENSMUSG00000058446	Znrf2	zinc and ring finger 2	9.131485183	9.436616414	9.311396698	9.373052306	9.186874312	9.177278132	9.307159913	9.695597242	9.31313765	9.3417274	0.02858975	0.763858271	0.973353259
ENSMUSG00000058444	Map2k5	mitogen-activated protein kinase kinase 5	9.636769407	9.536159472	9.706072417	9.74964447	9.638145501	9.444400722	9.71464674	9.575079131	9.657161442	9.593068023	-0.064093418	0.494504139	0.965516704
ENSMUSG00000058443	Rpl10-ps3	ribosomal protein L10, pseudogene 3	7.922498908	7.681739932	7.858380949	7.938498113	8.023758636	8.098575581	7.978506315	7.852460858	7.850279475	7.988325348	0.138045872	0.273750659	0.819054568
ENSMUSG00000058441	Panx2	pannexin 2	11.9491146	11.6857849	11.83624353	11.6587312	11.49682276	11.42323698	11.48513578	11.88984822	11.78246856	11.57376093	-0.208707624	0.082039453	0.474918271
ENSMUSG00000058440	Nrf1	nuclear respiratory factor 1	7.941362906	8.359952017	8.384492988	8.451305917	8.324368017	8.089757053	8.423590201	8.153172092	8.284278457	8.247721841	-0.036556616	0.74567551	0.973353259
ENSMUSG00000024497	Pou4f3	POU domain, class 4, transcription factor 3	0	0	1.846484642	0	0	0	0	0	0.46162116	0	-0.46162116	0.592102664	0.969741274
ENSMUSG00000073980	Gm9574	predicted gene 9574	1.04569736	1.037876205	0	1.639366891	0	0	1.688464829	0	0.930735114	0.422116207	-0.508618907	0.661858129	0.969741274
ENSMUSG00000073982	Rhog	ras homolog family member G	9.591708432	9.759443467	8.926280297	9.290176624	9.522667553	9.466710069	8.982000318	9.717858637	9.391902205	9.422309144	0.030406939	0.903212941	0.989735036
ENSMUSG00000024493	Lars	leucyl-tRNA synthetase	10.00428631	9.977082361	10.10224424	9.980130672	10.03211011	10.18019165	10.01662663	10.00504367	10.01593589	10.05849301	0.04255712	0.58872134	0.969741274
ENSMUSG00000024491	Rbm27	RNA binding motif protein 27	10.26359319	9.992080114	10.13147791	9.899351185	9.878875032	10.0384445	9.805260949	9.861680685	10.0716256	9.896065291	-0.175560309	0.081230414	0.472247789
ENSMUSG00000073988	Ttpa	tocopherol (alpha) transfer protein	7.176812797	6.448944514	6.451886068	7.091473664	6.679334324	6.661370141	7.260070645	7.301181286	6.792279261	6.975489099	0.183209838	0.464894961	0.957642267
ENSMUSG00000106570	C230071H17Rik	RIKEN cDNA C230071H17 gene	2.068014459	0	0	0	0	0	0	1.991176999	0.517003615	0.49779425	-0.019209365	0.976230212	0.9978586
ENSMUSG00000024498	Tcerg1	transcription elongation regulator 1 (CA150)	11.04341655	11.00104195	11.20886195	10.93879472	10.88349047	10.67841024	11.02442383	10.98893401	11.04802879	10.89381464	-0.154214155	0.12351422	0.57665261
ENSMUSG00000033016	Nfatc1	nuclear factor of activated T cells, cytoplasmic, calcineurin dependent 1	8.05542686	7.901010803	7.717190342	8.290043781	8.067647086	8.021841766	8.390521046	8.086299203	7.990917947	8.141577275	0.150659329	0.351158523	0.893772621
ENSMUSG00000033014	Trim33	tripartite motif-containing 33	11.18006399	11.28846451	11.337942	11.10595792	10.88272287	11.04347842	11.02056924	10.9931524	11.22810711	10.98498073	-0.243126373	0.002241359	0.049856576
ENSMUSG00000003934	Efnb3	ephrin B3	10.91012229	11.11229568	10.1513751	10.25071283	11.94287713	11.5459792	11.0382157	11.76342607	10.60612648	11.57262453	0.966498049	0.001417514	0.03565566
ENSMUSG00000116366	---	---	0	0	0	0	1.003492829	0	0	0	0	0.250873207	0.250873207	0.846512451	0.973353259
ENSMUSG00000116360	---	---	0	2.05644782	0	0	0	1.417032207	1.688464829	1.577122502	0.514111955	1.170654884	0.656542929	0.653873878	0.969741274
ENSMUSG00000007279	Scube2	signal peptide, CUB domain, EGF-like 2	5.131739574	5.499352317	5.118981298	3.659250993	4.530236522	5.238322067	3.949570471	6.32821994	4.852331045	5.01158725	0.159256205	0.546150802	0.965516704
ENSMUSG00000059316	Slc27a4	solute carrier family 27 (fatty acid transporter), member 4	11.38572582	11.68301488	11.79326953	11.69554086	11.5197153	11.51378847	11.47051697	11.3997393	11.63938777	11.47594001	-0.163447762	0.070877126	0.440155229
ENSMUSG00000105736	Gm42456	predicted gene 42456	2.66033993	3.527574467	4.1944172	3.659250993	3.006106913	2.941373951	4.392881974	3.895902629	3.510395648	3.559066367	0.048670719	0.912863126	0.994430695
ENSMUSG00000005864	Cnga2	cyclic nucleotide gated channel alpha 2	3.079044871	3.389405204	2.819232083	5.078396742	4.398963161	2.37180711	4.392881974	4.15880572	3.591519725	3.830614491	0.239094766	0.838622494	0.973353259
ENSMUSG00000093757	Mir5623	microRNA 5623	0	1.635246308	0	0	0	0	0	0	0.408811577	0	-0.408811577	0.662772563	0.969741274
ENSMUSG00000105731	Gm43063	predicted gene 43063	0	0	0	0	0	0	0	1.991176999	0	0.49779425	0.49779425	0.56486706	0.965516704
ENSMUSG00000005698	Ctcf	CCCTC-binding factor	10.92283377	10.8212553	11.01555027	10.89859565	10.73829216	10.78400153	10.67507896	10.75806858	10.91455875	10.73886031	-0.175698438	0.015166249	0.175591828
ENSMUSG00000005699	Pard6a	par-6 family cell polarity regulator alpha	8.308867318	8.298541315	8.040120183	8.720903939	8.424809386	8.626453986	8.509706331	7.749829688	8.342108189	8.327699848	-0.014408341	0.98644622	0.9978586
ENSMUSG00000005696	Sh2d1a	SH2 domain containing 1A	0	1.037876205	2.630511888	0	0	0	2.115933218	1.577122502	0.917097023	0.92326393	0.006166907	0.882308302	0.982325811
ENSMUSG00000086308	G630016G05Rik	RIKEN cDNA G630016G05 gene	5.971155194	5.499352317	6.003937024	5.032513649	6.995607103	5.721947949	6.23792768	6.646552516	5.626739546	6.400508812	0.773769266	0.010668379	0.141357938
ENSMUSG00000023947	Nfkbie	nuclear factor of kappa light polypeptide gene enhancer in B cells inhibitor, epsilon	6.392667578	6.431446373	5.944358618	6.664999273	5.889502295	5.831799566	6.674583019	5.988408708	6.358367961	6.096073397	-0.262294564	0.335306816	0.878518721
ENSMUSG00000004568	Arhgef18	rho/rac guanine nucleotide exchange factor (GEF) 18	10.2088542	10.21937726	10.86636927	10.81974676	10.64450341	10.19978962	10.73087385	10.64107628	10.52858687	10.55406079	0.025473916	0.977576833	0.9978586
ENSMUSG00000004565	Pnpla6	patatin-like phospholipase domain containing 6	10.96952853	11.15089717	10.98569179	11.30059667	10.98782739	11.00822834	11.01049884	11.04283384	11.10167854	11.0123471	-0.089331439	0.284996406	0.834059346
ENSMUSG00000004567	Mcoln1	mucolipin 1	11.50358753	11.31016911	11.45374733	11.59948244	11.4988279	11.44068107	11.37714004	11.44612201	11.4667466	11.44069275	-0.02605385	0.716617411	0.971667133
ENSMUSG00000094134	Ighv5-15	immunoglobulin heavy variable 5-15	0	0	0	0	0	0	0	1.577122502	0	0.394280625	0.394280625	0.681264798	0.969741274
ENSMUSG00000004561	Mettl17	methyltransferase like 17	9.726506602	9.519693684	9.624590809	9.817165834	9.753483441	9.624627577	9.770797129	9.639290365	9.671989232	9.697049628	0.025060396	0.816394858	0.973353259
ENSMUSG00000094132	Gm3264	predicted gene 3264	1.645576219	2.05644782	1.449333651	0	0	0	0	2.312514971	1.287839423	0.578128743	-0.70971068	0.665177464	0.969741274
ENSMUSG00000004562	Arhgef40	Rho guanine nucleotide exchange factor (GEF) 40	9.259765118	9.536159472	9.33671956	9.823915727	9.743370994	9.657822285	9.731722507	9.681725205	9.489139969	9.703660248	0.214520279	0.107576048	0.541015829
ENSMUSG00000047045	Tmem164	transmembrane protein 164	9.733738719	9.188394012	10.05255718	10.04077907	9.940660761	9.899014565	9.576551364	9.704200017	9.753867245	9.780106677	0.026239432	0.97042246	0.9978586
ENSMUSG00000047044	D030056L22Rik	RIKEN cDNA D030056L22 gene	9.267260439	9.640741291	9.224321364	9.345170826	9.41210842	9.446129127	9.553261081	9.356748316	9.36937348	9.442061736	0.072688256	0.559259817	0.965516704
ENSMUSG00000077192	Snora17	small nucleolar RNA, H/ACA box 17	2.884829173	2.05644782	1.449333651	3.242017635	2.590779194	2.117931851	3.725440712	3.311334	2.40815707	2.936371439	0.528214369	0.438706125	0.947847536
ENSMUSG00000047040	Prr15l	proline rich 15-like	0	3.527574467	2.41333609	0	0	2.941373951	2.445268757	2.989701238	1.485227639	2.094085987	0.608858347	0.821582239	0.973353259
ENSMUSG00000072612	Gm10382	predicted gene 10382	4.084528611	3.653659897	3.61474788	5.436488963	4.591649679	4.076249871	4.731512262	4.632553048	4.197356338	4.507991215	0.310634877	0.791278235	0.973353259
ENSMUSG00000081079	Gm13059	predicted gene 13059	0	0	1.449333651	0	0	0	0	0	0.362333413	0	-0.362333413	0.692015925	0.969741274
ENSMUSG00000077222	Gm22270	predicted gene, 22270	3.250190284	1.635246308	2.819232083	3.242017635	2.590779194	3.567705506	3.459970513	2.312514971	2.736671577	2.982742546	0.246070969	0.70962919	0.969955199
ENSMUSG00000081071	Gm9836	predicted pseudogene 9836	3.403168963	2.8716894	2.986096998	3.070993449	2.813337462	2.775313294	3.30634127	2.989701238	3.082987203	2.971173316	-0.111813886	0.824593155	0.973353259
ENSMUSG00000072618	Gm10384	predicted gene 10384	0	3.389405204	2.819232083	3.882583475	2.813337462	2.587621499	3.459970513	2.989701238	2.522805191	2.962657678	0.439852488	0.925738137	0.9978586
ENSMUSG00000081076	Rpsa-ps4	ribosomal protein S4, pseudogene 4	0	2.05644782	0.899492338	0	1.003492829	1.417032207	0	0	0.73898504	0.605131259	-0.13385378	0.809994973	0.973353259
ENSMUSG00000081077	Gm13899	predicted gene 13899	0	0	0	0	0	0	1.078314528	1.577122502	0	0.663859257	0.663859257	0.554845582	0.965516704
ENSMUSG00000085768	Gm13707	predicted gene 13707	2.394364844	0	0	0	0	0.875920088	3.459970513	2.312514971	0.598591211	1.662101393	1.063510182	0.289475631	0.838712242
ENSMUSG00000085760	Gm14302	predicted gene 14302	2.66033993	2.64754811	0	0	1.58961773	0	3.30634127	2.575155827	1.32697201	1.867778707	0.540806697	0.669007245	0.969741274
ENSMUSG00000085761	4930455G09Rik	RIKEN cDNA 4930455G09 gene	0	1.635246308	0	1.639366891	1.58961773	1.809634363	0	0	0.8186533	0.849813023	0.031159723	0.946937512	0.9978586
ENSMUSG00000085762	Lrrc75aos2	leucine rich repeat containing 75A, opposite strand 2	0	2.05644782	2.819232083	3.882583475	2.005236078	2.941373951	2.713220414	1.991176999	2.189565845	2.41275186	0.223186016	0.718641266	0.972846674
ENSMUSG00000085763	Smc2os	structural maintenance of chromosomes 2, opposite strand	2.068014459	0	3.394994784	2.652653363	3.006106913	1.809634363	3.459970513	2.312514971	2.028915652	2.64705669	0.618141038	0.69565817	0.96988229
ENSMUSG00000085766	2810430I11Rik	RIKEN cDNA 2810430I11 gene	2.394364844	3.527574467	2.819232083	0	0	3.090278098	2.713220414	1.991176999	2.185292848	1.948668878	-0.236623971	0.724418141	0.973353259
ENSMUSG00000085767	Gm13563	predicted gene 13563	7.327818446	7.483745578	7.150374269	7.337729905	7.721189596	7.249513965	7.736803988	7.919009763	7.32491705	7.656629328	0.331712278	0.043641275	0.335978641
ENSMUSG00000021587	Pcsk1	proprotein convertase subtilisin/kexin type 1	10.8178606	11.13409371	11.37555082	10.63635161	10.20664365	10.36330328	10.88975838	10.37085685	10.99096419	10.45764054	-0.533323646	0.001596858	0.038869294
ENSMUSG00000107225	Gm43637	predicted gene 43637	2.068014459	0	0	0	2.005236078	0	0	0	0.517003615	0.50130902	-0.015694595	0.980327165	0.9978586
ENSMUSG00000067786	Nnat	neuronatin	9.993782362	9.35775477	9.086432779	8.665613804	10.72207709	9.96198136	10.58085095	10.73390518	9.275895929	10.49970365	1.223807717	0.000383732	0.013824737
ENSMUSG00000021539	Lect2	leukocyte cell-derived chemotaxin 2	2.884829173	1.635246308	1.846484642	0	3.006106913	1.809634363	0	0	1.591640031	1.203935319	-0.387704712	0.883726614	0.982816932
ENSMUSG00000097977	Gm5652	predicted gene 5652	0	0	0	1.040994419	0	0	0	0	0.260248605	0	-0.260248605	0.830018289	0.973353259
ENSMUSG00000029810	Tmem176b	transmembrane protein 176B	8.867869973	9.135342851	8.656122343	9.162860045	9.133669244	9.130749012	9.106500206	9.240908783	8.955548803	9.152956811	0.197408009	0.138383215	0.608367682
ENSMUSG00000006589	Aprt	adenine phosphoribosyl transferase	7.490354704	8.293707343	8.226731349	8.146651846	7.871133494	8.20856541	8.207333828	8.27828059	8.03936131	8.14132833	0.10196702	0.665679861	0.969741274
ENSMUSG00000029815	Malsu1	mitochondrial assembly of ribosomal large subunit 1	7.447011528	7.881812938	7.606232848	7.260222787	7.449880716	7.378210444	7.788492651	7.455896319	7.548820025	7.518120032	-0.030699992	0.802081268	0.973353259
ENSMUSG00000029816	Gpnmb	glycoprotein (transmembrane) nmb	7.20830488	5.627820819	6.203482982	6.346621072	6.788273659	6.401183497	6.577175883	7.065127148	6.346557438	6.707940047	0.361382608	0.364493185	0.905647199
ENSMUSG00000029817	Tra2a	transformer 2 alpha homolog (Drosophila)	10.77906315	10.74450955	10.96460442	10.93490279	11.03487989	11.03661169	11.19350174	10.97620431	10.85576998	11.06029941	0.20452943	0.017575083	0.192517722
ENSMUSG00000006585	Cdt1	chromatin licensing and DNA replication factor 1	5.131739574	5.854817447	4.752870796	5.72313878	5.399128913	4.395355878	5.318492948	5.743330419	5.365641649	5.214077039	-0.15156461	0.688358804	0.969741274
ENSMUSG00000089686	Mnd1-ps	Mnd1 retrotransposed pseudogene	0	0	0	0	1.58961773	0	0	0	0	0.397404432	0.397404432	0.678492791	0.969741274
ENSMUSG00000089685	Gm9017	predicted gene 9017	2.66033993	2.64754811	2.630511888	3.070993449	2.32751257	3.567705506	3.30634127	2.797267076	2.752348344	2.999706606	0.247358261	0.567610087	0.967655683
ENSMUSG00000006586	Runx1t1	runt-related transcription factor 1; translocated to, 1 (cyclin D-related)	8.733629654	9.138042255	8.592857682	8.42934302	9.77018158	8.355591779	8.271015971	8.010637257	8.723468153	8.601856647	-0.121611506	0.928830751	0.9978586
ENSMUSG00000089683	4930570N18Rik	RIKEN cDNA 4930570N18 gene	0	0	0	0	2.32751257	0	0	0	0	0.581878143	0.581878143	0.480841209	0.963614476
ENSMUSG00000089682	Bcl2l2	BCL2-like 2	11.80635645	11.99139047	12.13440602	12.1066689	10.62627575	11.91794822	12.00196172	11.92449684	12.00970546	11.61767064	-0.392034824	0.331118748	0.875888033
ENSMUSG00000089680	Gm15722	predicted gene 15722	2.394364844	2.8716894	0	0	0	1.417032207	2.445268757	3.159462173	1.316513561	1.755440784	0.438927223	0.761415745	0.973353259
ENSMUSG00000095661	Gm8935	predicted pseudogene 8935	0	1.037876205	1.449333651	1.040994419	0	1.809634363	0	0.994123999	0.882051069	0.70093959	-0.181111478	0.957098541	0.9978586
ENSMUSG00000041439	Mfsd6	major facilitator superfamily domain containing 6	11.66502946	11.65454692	11.91368603	11.41621601	11.61615373	11.73599267	11.56881263	11.47456034	11.6623696	11.59887984	-0.063489762	0.510727247	0.965516704
ENSMUSG00000003032	Klf4	Kruppel-like factor 4 (gut)	8.640505707	8.369172035	8.643689407	8.535959269	7.538321059	7.823355072	8.163261761	7.814824542	8.547331604	7.834940609	-0.712390996	1.49E-06	0.000187821
ENSMUSG00000003033	Ap1m1	adaptor-related protein complex AP-1, mu subunit 1	10.87048176	10.64648816	10.64644432	10.76993287	10.85403079	10.79828106	10.83900853	10.73390518	10.73333678	10.80630639	0.072969613	0.375479791	0.911569435
ENSMUSG00000003031	Cdkn1b	cyclin-dependent kinase inhibitor 1B	10.82210772	10.74893107	10.61812683	10.77951344	10.6776292	10.49854339	10.3716429	10.71018458	10.74216977	10.56450002	-0.177669746	0.073343584	0.447174027
ENSMUSG00000003038	Hmgn2	high mobility group nucleosomal binding domain 2	9.897249137	10.07047917	9.067941044	9.194456312	9.822352794	9.461592293	9.652241736	9.655350053	9.557531416	9.647884219	0.090352803	0.868254536	0.978422154
ENSMUSG00000003039	Fam32a	family with sequence similarity 32, member A	10.73829481	10.6615758	10.88299301	10.77864511	10.76519642	10.73888538	10.72992993	10.71615139	10.76537718	10.73754078	-0.027836401	0.67871811	0.969741274
ENSMUSG00000047959	Kcna3	potassium voltage-gated channel, shaker-related subfamily, member 3	7.166160799	7.862356157	8.035369088	7.481270171	7.115451241	7.142718961	7.611204507	7.965550811	7.636289054	7.45873138	-0.177557674	0.450211829	0.955408935
ENSMUSG00000084411	Gm11510	predicted gene 11510	1.04569736	0	0.899492338	0	1.003492829	1.417032207	2.713220414	0	0.486297424	1.283436363	0.797138938	0.275392523	0.821621584
ENSMUSG00000084413	Gm12017	predicted gene 12017	0	0	0.899492338	0	2.005236078	0	0	1.577122502	0.224873085	0.895589645	0.67071656	0.450659648	0.955408935
ENSMUSG00000047953	Gp5	glycoprotein 5 (platelet)	2.884829173	4.070221307	4.261049233	4.163686085	4.707149209	4.145967774	4.231515646	3.574171483	3.84494645	4.164701028	0.319754579	0.528323041	0.965516704
ENSMUSG00000084416	Rpl10a-ps1	ribosomal protein L10A, pseudogene 1	8.002518876	8.259408282	7.941991738	8.113978937	8.474563111	8.310760468	8.196441386	8.539002283	8.079474458	8.380191812	0.300717354	0.01904697	0.202966439
ENSMUSG00000108220	Gm44056	predicted gene, 44056	3.667665513	3.236588011	3.61474788	3.394899473	3.328209112	3.66590362	3.459970513	1.991176999	3.478475219	3.111315061	-0.367160158	0.624805286	0.969741274
ENSMUSG00000034379	Wdr5b	WD repeat domain 5B	7.384056545	6.688749398	6.770514345	6.962832611	7.599398196	7.201204215	7.046196285	7.11759144	6.951538225	7.241097534	0.289559309	0.162797804	0.655297086
ENSMUSG00000105613	Gm43684	predicted gene 43684	6.197251107	5.596760178	6.169194966	6.454947835	5.591794709	6.797577367	6.279808786	6.729801456	6.104538521	6.349745579	0.245207058	0.310659911	0.857294055
ENSMUSG00000034371	Tkfc	triokinase, FMN cyclase	7.890500212	8.068851013	8.34279978	8.124952329	8.351251714	8.388324068	8.478574184	8.148136646	8.106775833	8.341571653	0.23479582	0.091126535	0.498982745
ENSMUSG00000034377	Tulp4	tubby like protein 4	12.06259074	12.49420365	12.13745749	12.23723801	12.06293582	12.01342613	12.06955747	12.38000677	12.23287247	12.13148155	-0.101390923	0.370873538	0.908595325
ENSMUSG00000074754	Smim26	small integral membrane protein 26	6.41082874	6.340623161	6.507835602	6.033783582	7.355662675	7.303903871	6.705643439	6.833816833	6.323267771	7.049756704	0.726488933	0.000442875	0.015255679
ENSMUSG00000074758	Gm5535	predicted gene 5535	4.545452185	4.530898564	4.798449417	3.982495002	5.254721557	4.395355878	4.231515646	4.512299928	4.464323792	4.598473252	0.13414946	0.670277754	0.969741274
ENSMUSG00000080303	Gm12419	predicted gene 12419	0	0	1.846484642	0	1.003492829	0	0	2.312514971	0.46162116	0.82900195	0.36738079	0.723154274	0.973353259
ENSMUSG00000108226	Gm44063	predicted gene, 44063	2.66033993	1.037876205	1.449333651	1.639366891	2.005236078	2.117931851	1.078314528	1.577122502	1.696729169	1.69465124	-0.00207793	0.935628103	0.9978586
ENSMUSG00000087825	Gm22279	predicted gene, 22279	0	1.037876205	0	0	0	0	0	0	0.259469051	0	-0.259469051	0.830018289	0.973353259
ENSMUSG00000087823	Gm22281	predicted gene, 22281	1.645576219	0	1.449333651	1.040994419	1.58961773	0	1.078314528	1.577122502	1.033976072	1.06126369	0.027287618	0.986338168	0.9978586
ENSMUSG00000089149	Gm22282	predicted gene, 22282	0	0	0	0	0	0	0	1.577122502	0	0.394280625	0.394280625	0.681264798	0.969741274
ENSMUSG00000017007	Rbpjl	recombination signal binding protein for immunoglobulin kappa J region-like	4.084528611	4.393062975	4.051143259	3.775234473	5.498675636	4.002991028	5.054651607	5.919155131	4.07599233	5.11886835	1.042876021	0.004610398	0.080505409
ENSMUSG00000017002	Slpi	secretory leukocyte peptidase inhibitor	5.673135393	3.06564474	4.261049233	4.985123232	4.650554971	5.810488226	4.231515646	5.310447637	4.496238149	5.00075162	0.50451347	0.475452316	0.962049416
ENSMUSG00000017000	Svs6	seminal vesicle secretory protein 6	0	0	0	0	0	0.875920088	0	0	0	0.218980022	0.218980022	0.846512451	0.973353259
ENSMUSG00000017009	Sdc4	syndecan 4	10.88922425	10.84540558	10.57048097	10.98017184	10.54127541	10.38328807	10.23992561	10.31128796	10.82132066	10.36894426	-0.452376395	2.18E-05	0.001593102
ENSMUSG00000046603	Tcaim	T cell activation inhibitor, mitochondrial	8.848013304	8.809321936	8.543519343	8.695365327	8.889605526	8.793259942	8.777938073	8.821139911	8.724054977	8.820485863	0.096430886	0.373459711	0.909888413
ENSMUSG00000046607	Hrk	harakiri, BCL2 interacting protein (contains only BH3 domain)	9.753442113	10.20013163	10.30927722	9.361500435	10.70045998	10.76196679	10.62822761	11.07436563	9.90608785	10.791255	0.885167151	1.64E-06	0.000205779
ENSMUSG00000079260	Tmppe	transmembrane protein with metallophosphoesterase domain	7.837778601	8.151329054	8.12306831	7.894287762	7.966951201	8.268404189	8.129301061	7.782693094	8.001615932	8.036837386	0.035221455	0.783457492	0.973353259
ENSMUSG00000046605	B3gntl1	UDP-GlcNAc:betaGal beta-1,3-N-acetylglucosaminyltransferase-like 1	6.689004743	7.244202215	7.284553861	7.080241645	7.166799885	7.217487871	7.093932632	7.602994137	7.074500616	7.270303631	0.195803016	0.311108086	0.858155039
ENSMUSG00000015533	Itga2	integrin alpha 2	1.645576219	2.8716894	2.630511888	2.652653363	4.006542134	2.775313294	2.115933218	1.991176999	2.450107718	2.722241411	0.272133694	0.500718405	0.965516704
ENSMUSG00000015536	Mocs2	molybdenum cofactor synthesis 2	9.467070919	9.640741291	9.669744127	9.756716991	9.844597549	9.791633066	9.720361148	9.738107127	9.633568332	9.773674723	0.14010639	0.128470441	0.586382222
ENSMUSG00000082812	Gm14860	predicted gene 14860	1.645576219	0	0	2.386971434	0	1.809634363	1.688464829	0	1.008136913	0.874524798	-0.133612115	0.831640877	0.973353259
ENSMUSG00000045555	Mettl24	methyltransferase like 24	4.944961085	5.026626884	4.324739194	4.83282835	3.006106913	4.917967956	4.14351718	3.895902629	4.782288878	3.99087367	-0.791415208	0.123962454	0.577560356
ENSMUSG00000082816	Gm11953	predicted gene 11953	0	0	0.899492338	0	0	0	1.078314528	0	0.224873085	0.269578632	0.044705548	0.991579818	0.9978586
ENSMUSG00000082815	Gm5678	predicted gene 5678	3.667665513	2.382061721	4.124558065	2.652653363	3.465775941	3.462332101	0	2.797267076	3.206734666	2.431343779	-0.775390886	0.497525619	0.965516704
ENSMUSG00000082814	Gm12956	predicted gene 12956	2.66033993	2.64754811	0	0	2.005236078	1.809634363	0	1.991176999	1.32697201	1.45151186	0.12453985	0.837547329	0.973353259
ENSMUSG00000099417	1700028B04Rik	RIKEN cDNA 1700028B04 gene	1.04569736	1.037876205	0	0	1.58961773	0	0	0	0.520893391	0.397404432	-0.123488959	0.990378155	0.9978586
ENSMUSG00000099413	Gm17767	predicted gene, 17767	2.884829173	2.05644782	2.630511888	1.639366891	0	2.587621499	2.713220414	3.159462173	2.302788943	2.115076021	-0.187712922	0.885274634	0.983467314
ENSMUSG00000002633	Shh	sonic hedgehog	6.761561358	6.597552985	6.466078181	6.401800948	6.273673366	6.989955227	6.945706612	6.527509914	6.556748368	6.68421128	0.127462912	0.468794293	0.958672166
ENSMUSG00000085666	Gm9855	predicted pseudogene 9855	5.257491152	5.532557745	5.439791447	4.662538529	5.466250643	5.331037707	5.541461475	5.197996871	5.223094718	5.384186674	0.161091955	0.655984395	0.969741274
ENSMUSG00000002635	Pdcd2l	programmed cell death 2-like	7.68199652	7.80236005	7.723111394	7.975343427	7.355662675	7.385434867	7.602979296	7.187976746	7.795702848	7.383013396	-0.412689452	0.004863285	0.083866045
ENSMUSG00000000673	Haao	3-hydroxyanthranilate 3,4-dioxygenase	2.394364844	2.64754811	2.157573411	2.061062922	3.465775941	2.775313294	3.725440712	2.797267076	2.315137322	3.190949256	0.875811934	0.114730095	0.557752911
ENSMUSG00000044600	Smim7	small integral membrane protein 7	10.76059431	11.0209217	11.1876076	11.02918353	10.88349047	11.0717431	10.90823427	10.82270149	10.99957679	10.92154233	-0.078034453	0.417990343	0.934724096
ENSMUSG00000044609	Gm9294	predicted pseudogene 9294	2.884829173	3.653659897	2.986096998	3.533121572	3.176128642	3.348651568	2.115933218	3.448730115	3.26442691	3.022360886	-0.242066025	0.733835615	0.973353259
ENSMUSG00000115018	---	---	6.830642994	8.54625331	5.944358618	1.040994419	5.094235333	8.751934727	7.729266365	9.051641149	5.590562335	7.656769394	2.066207058	0.382448224	0.915024491
ENSMUSG00000041078	Grid1	glutamate receptor, ionotropic, delta 1	10.90051464	10.9028798	10.98815252	10.9665109	10.9734792	11.14487022	10.93960024	10.76136993	10.93951447	10.9548299	0.015315432	0.812473509	0.973353259
ENSMUSG00000041079	Rwdd2b	RWD domain containing 2B	7.62090139	7.93865673	7.723111394	7.687783105	8.012574689	8.13760519	7.991167189	7.688720531	7.742613155	7.9575169	0.214903745	0.124645805	0.578382626
ENSMUSG00000112109	AC159466.1	---	2.068014459	0	0	2.061062922	2.590779194	1.417032207	0	1.577122502	1.032269345	1.396233476	0.363964131	0.758418738	0.973353259
ENSMUSG00000112108	AC121788.2	---	0	0	0	0	2.005236078	0	0	0	0	0.50130902	0.50130902	0.561529182	0.965516704
ENSMUSG00000041075	Fzd7	frizzled class receptor 7	7.978366677	8.074498693	7.472028974	7.855284053	8.040373658	7.462603722	7.900115057	8.207432165	7.845044599	7.902631151	0.057586551	0.722997758	0.973353259
ENSMUSG00000112105	AC155273.1	---	4.172313377	3.527574467	2.41333609	3.070993449	1.58961773	4.505549955	3.841853679	3.895902629	3.296054346	3.458230998	0.162176652	0.550335606	0.965516704
ENSMUSG00000112104	AC153840.1	---	0	0	0	0	0	1.809634363	0	0	0	0.452408591	0.452408591	0.609425585	0.969741274
ENSMUSG00000041380	Htr2c	5-hydroxytryptamine (serotonin) receptor 2C	9.014624568	8.509200983	8.068302797	7.167740637	10.99352694	9.943745275	9.983744152	9.389120894	8.189967246	10.07753432	1.88756707	0.000232066	0.009645261
ENSMUSG00000079481	Nhsl2	NHS-like 2	10.75970892	10.81198805	10.93748595	10.5565343	10.55868085	10.79013865	10.7616819	10.89436912	10.76642931	10.75121763	-0.015211676	0.870902232	0.979317155
ENSMUSG00000079487	Med12	mediator complex subunit 12	10.83393358	10.74716409	10.49894811	10.79333623	10.76269535	10.60681451	10.69456329	10.9754938	10.7183455	10.75989174	0.041546236	0.688787909	0.969741274
ENSMUSG00000079484	Phyhd1	phytanoyl-CoA dioxygenase domain containing 1	9.011652631	8.897989753	8.403053318	8.763659341	8.852452143	8.2367993	8.140710351	8.621248947	8.769088761	8.462802685	-0.306286076	0.09806556	0.517069984
ENSMUSG00000106385	Gm42943	predicted gene 42943	0	2.05644782	0	0	1.58961773	0	0	0	0.514111955	0.397404432	-0.116707523	0.851422874	0.973750694
ENSMUSG00000081892	Gm8864	predicted gene 8864	1.645576219	0	0	0	1.58961773	0	0	1.577122502	0.411394055	0.791685058	0.380291003	0.727410358	0.973353259
ENSMUSG00000081895	Rpl17-ps10	ribosomal protein L17, pseudogene 10	7.689454656	7.767918247	7.513616963	7.498248694	8.083767041	7.448876566	7.721689153	7.639334484	7.61730964	7.723416811	0.106107171	0.466747687	0.957642267
ENSMUSG00000110077	Gm45632	predicted gene 45632	5.81626502	6.050906064	5.523602472	5.779782859	5.364359452	4.703507358	5.277735714	5.942610978	5.792639104	5.322053376	-0.470585728	0.153806297	0.637762667
ENSMUSG00000058163	Gm5431	predicted gene 5431	2.394364844	2.05644782	0	3.070993449	2.32751257	3.090278098	2.713220414	3.448730115	1.880451528	2.894935299	1.014483771	0.291097742	0.840206159
ENSMUSG00000000093	Tbx2	T-box 2	6.947220296	6.483316692	6.186440836	6.913056183	6.636263535	6.912056639	6.945706612	7.096834104	6.632508502	6.897715222	0.265206721	0.247613179	0.78309845
ENSMUSG00000000094	Tbx4	T-box 4	2.66033993	0	3.509051426	3.394899473	4.094030572	3.348651568	2.713220414	4.076382183	2.391072707	3.558071184	1.166998477	0.221947072	0.748773052
ENSMUSG00000050777	Tmem37	transmembrane protein 37	5.702919875	5.116967398	4.500498474	6.07962694	2.813337462	5.360664488	4.467265589	3.895902629	5.350003172	4.134292542	-1.21571063	0.03147321	0.278752738
ENSMUSG00000044254	Pcsk9	proprotein convertase subtilisin/kexin type 9	6.37427488	5.688005168	6.348428604	6.209015353	7.614271842	7.724274296	6.98421512	5.988408708	6.154931001	7.077792492	0.922861491	0.001059789	0.029187635
ENSMUSG00000040389	Wdr47	WD repeat domain 47	11.97413903	11.95969778	12.15234453	11.93023988	11.89951821	12.09004444	11.87919706	11.75971682	12.0041053	11.90711913	-0.096986174	0.298525407	0.847468072
ENSMUSG00000040385	Ppp1ca	protein phosphatase 1, catalytic subunit, alpha isoform	12.11268519	11.95319819	12.039725	11.81850293	12.24358798	12.40509132	11.95950778	11.8811493	11.98102783	12.12233409	0.141306265	0.205932937	0.725218375
ENSMUSG00000040387	Klhl32	kelch-like 32	8.807460768	9.046181772	9.19053085	9.017333545	8.52659451	9.062528698	9.196715712	8.933691787	9.015376734	8.929882677	-0.085494057	0.623038674	0.969741274
ENSMUSG00000115457	---	---	0	1.037876205	0.899492338	3.070993449	1.58961773	1.417032207	1.078314528	0.994123999	1.252090498	1.269772116	0.017681618	0.628505231	0.969741274
ENSMUSG00000040380	Cbln3	cerebellin 3 precursor protein	3.079044871	3.06564474	3.61474788	3.070993449	2.813337462	4.076249871	3.725440712	4.796001121	3.207607735	3.852757292	0.645149557	0.122985776	0.576159031
ENSMUSG00000040383	Aqr	aquarius	10.70740352	10.69128583	10.61733224	10.50181159	10.55386703	10.68866711	10.43092873	10.47908306	10.62945829	10.53813648	-0.09132181	0.308184223	0.855799126
ENSMUSG00000109209	Gm45104	predicted gene 45104	3.891101417	0	2.41333609	2.652653363	2.590779194	4.145967774	3.598803161	5.573432784	2.239272717	3.977245728	1.737973011	0.027746362	0.258022686
ENSMUSG00000109203	Gm32849	predicted gene, 32849	2.068014459	0	1.846484642	2.061062922	0	0	2.713220414	2.989701238	1.493890506	1.425730413	-0.068160093	0.741205584	0.973353259
ENSMUSG00000109205	Gm44954	predicted gene 44954	3.541470204	3.876923321	4.051143259	4.163686085	3.465775941	3.090278098	4.31445375	3.311334	3.908305717	3.545460447	-0.36284527	0.476884621	0.963305727
ENSMUSG00000097832	Gm26912	predicted gene, 26912	0	0	0	0	1.58961773	0	0	0	0	0.397404432	0.397404432	0.678492791	0.969741274
ENSMUSG00000041923	Nol4	nucleolar protein 4	11.46391137	11.60467728	11.939663	11.36217501	11.29237665	11.500542	11.62269526	11.53077619	11.59260667	11.48659753	-0.106009139	0.34509072	0.887757558
ENSMUSG00000041920	Slc16a6	solute carrier family 16 (monocarboxylic acid transporters), member 6	9.569649657	8.91697496	8.746103396	9.157526063	8.904808087	9.755845917	9.223789054	9.024420101	9.097563519	9.22721579	0.129652271	0.498561574	0.965516704
ENSMUSG00000041921	Metap1d	methionyl aminopeptidase type 1D (mitochondrial)	8.456049406	8.466883908	8.421377898	8.560416078	8.807861517	8.441279771	8.852687459	8.956914361	8.476181823	8.764685777	0.288503954	0.019882665	0.208767986
ENSMUSG00000041926	Rnpep	arginyl aminopeptidase (aminopeptidase B)	10.17737424	10.42234884	10.20313051	10.22799167	10.40036251	10.3271807	10.28817643	10.20497976	10.25771131	10.30517485	0.047463535	0.596700945	0.969741274
ENSMUSG00000090150	Acad11	acyl-Coenzyme A dehydrogenase family, member 11	9.543137761	9.56252193	9.549937076	9.673211267	9.397135806	9.559053246	9.503313281	9.590009973	9.582202008	9.512378076	-0.069823932	0.429147336	0.939468005
ENSMUSG00000055691	Gja6	gap junction protein, alpha 6	2.068014459	2.64754811	0	2.652653363	2.005236078	2.587621499	3.459970513	2.989701238	1.842053983	2.760632332	0.918578349	0.315109113	0.860196944
ENSMUSG00000055692	Tmem191c	transmembrane protein 191C	10.47578878	10.46059133	10.55313527	10.84236203	10.58251191	10.80839488	10.78549988	10.64107628	10.58296935	10.70437074	0.121401386	0.268650925	0.81227932
ENSMUSG00000090159	Gm8580	predicted gene 8580	0	0	0	0	0	0	2.115933218	0	0	0.528983305	0.528983305	0.535790408	0.965516704
ENSMUSG00000089542	Gm25835	predicted gene, 25835	3.667665513	3.769606182	4.261049233	3.982495002	2.590779194	3.462332101	4.467265589	3.988962792	3.920203982	3.627334919	-0.292869064	0.713308405	0.971282496
ENSMUSG00000021268	Meg3	maternally expressed 3	16.78206134	16.78713507	16.74717457	17.07762686	16.72671356	16.5636499	16.78750473	16.99742941	16.84849946	16.7688244	-0.079675059	0.572474027	0.969741274
ENSMUSG00000040037	Negr1	neuronal growth regulator 1	12.82405327	12.3802608	12.43782349	12.50815466	12.60665653	12.8976918	12.61660539	12.37112035	12.53757305	12.62301852	0.085445466	0.492631312	0.965516704
ENSMUSG00000040035	Disp2	dispatched RND tramsporter family member 2	13.23814075	13.52547266	13.70510676	13.39344774	13.21185325	13.4394243	13.40539427	13.25618225	13.46554198	13.32821352	-0.137328458	0.187726059	0.696769278
ENSMUSG00000040034	Nup43	nucleoporin 43	6.336770718	5.828320675	6.003937024	6.033783582	6.25481315	6.266809174	6.525889629	5.846408813	6.050703	6.223480191	0.172777192	0.426239438	0.937662366
ENSMUSG00000040033	Stat2	signal transducer and activator of transcription 2	9.495004368	9.221859788	9.327032527	9.496482725	9.254893288	9.539756936	9.574449534	9.422869281	9.385094852	9.44799226	0.062897408	0.555970635	0.965516704
ENSMUSG00000094890	Gm22285	predicted gene, 22285	0	0	0	1.040994419	0	0	0	0	0.260248605	0	-0.260248605	0.830018289	0.973353259
ENSMUSG00000094891	Olfr55	olfactory receptor 55	2.66033993	0	0	0	3.006106913	1.417032207	2.445268757	2.797267076	0.665084982	2.416418738	1.751333756	0.154730301	0.639103418
ENSMUSG00000061740	Cyp2d22	cytochrome P450, family 2, subfamily d, polypeptide 22	10.59574314	10.12047411	9.978999283	10.26318277	9.903302323	9.818569969	9.831899366	9.971229225	10.23959983	9.881250221	-0.358349605	0.003065896	0.061743467
ENSMUSG00000061742	Slc22a12	solute carrier family 22 (organic anion/cation transporter), member 12	3.250190284	2.382061721	2.630511888	2.876933903	3.006106913	2.775313294	2.115933218	2.989701238	2.784924449	2.721763666	-0.063160783	0.9331002	0.9978586
ENSMUSG00000105925	Gm43846	predicted gene 43846	2.394364844	3.06564474	3.509051426	3.775234473	2.005236078	2.775313294	4.049800494	1.577122502	3.186073871	2.601868092	-0.584205779	0.567833791	0.967919182
ENSMUSG00000105923	A830019L24Rik	RIKEN cDNA A830019L24 gene	4.255061632	4.979242675	4.124558065	3.659250993	3.006106913	2.775313294	4.954769966	4.942801653	4.254528341	3.919747957	-0.334780385	0.876351674	0.98106821
ENSMUSG00000105922	Gm42769	predicted gene 42769	3.891101417	2.05644782	3.394994784	3.533121572	3.706881428	2.941373951	3.725440712	3.895902629	3.218916398	3.56739968	0.348483282	0.636348349	0.969741274
ENSMUSG00000105929	Gm43693	predicted gene 43693	4.894227342	4.318870111	3.394994784	5.166004367	4.006542134	3.567705506	4.605430475	4.15880572	4.443524151	4.084620959	-0.358903192	0.301296289	0.850498436
ENSMUSG00000105928	Gm9256	predicted gene 9256	3.079044871	4.070221307	3.973791331	3.242017635	2.32751257	4.276043866	2.445268757	2.575155827	3.591268786	2.905995255	-0.68527353	0.417776822	0.934639483
ENSMUSG00000015095	Fbxw5	F-box and WD-40 domain protein 5	11.20369438	11.23525331	11.31313155	11.20170662	11.23639401	11.2593976	11.25121993	11.32194297	11.23844647	11.26723863	0.028792162	0.662308638	0.969741274
ENSMUSG00000015094	Npdc1	neural proliferation, differentiation and control 1	12.10782288	12.16090287	12.21985567	12.33113837	11.89038237	12.00318943	12.17110891	12.07767716	12.20492995	12.03558947	-0.16934048	0.049223403	0.356814083
ENSMUSG00000015093	Clic3	chloride intracellular channel 3	4.841644267	5.282265739	5.006959543	5.505291031	4.707149209	4.557643452	4.14351718	3.796423229	5.159040145	4.301183268	-0.857856878	0.013341258	0.1622297
ENSMUSG00000015092	Edf1	endothelial differentiation-related factor 1	10.27974145	10.42456165	10.55562603	10.29389406	10.64269097	10.35780449	10.66819679	10.37947636	10.3884558	10.51204215	0.123586356	0.238086193	0.77137052
ENSMUSG00000015090	Ptgds	prostaglandin D2 synthase (brain)	13.88358875	14.02697402	13.73928854	13.6362775	13.42627845	13.0356661	13.21900459	13.63410844	13.8215322	13.32876439	-0.492767809	0.000313123	0.012056549
ENSMUSG00000109680	Gm32098	predicted gene, 32098	0	1.635246308	0	0	0	0	0	0	0.408811577	0	-0.408811577	0.662772563	0.969741274
ENSMUSG00000056342	Usp34	ubiquitin specific peptidase 34	12.02881382	12.08634245	12.15316711	11.96805595	11.52906593	11.76050984	11.76311306	11.98893112	12.05909483	11.76040499	-0.298689844	0.003669183	0.069507606
ENSMUSG00000038372	Gmds	GDP-mannose 4, 6-dehydratase	6.674045027	7.203545766	6.94278113	6.925662221	7.254858944	7.334087295	7.509264656	7.422920541	6.936508536	7.380282859	0.443774323	0.008117972	0.118864978
ENSMUSG00000065245	Gm22295	predicted gene, 22295	0	0	0.899492338	0	0	0	0	0.994123999	0.224873085	0.248531	0.023657915	0.991579818	0.9978586
ENSMUSG00000047565	Acot10	acyl-CoA thioesterase 10	1.04569736	2.382061721	1.449333651	1.040994419	3.591359576	2.587621499	2.115933218	2.312514971	1.479521788	2.651857316	1.172335528	0.098843881	0.51910113
ENSMUSG00000047562	Mmp10	matrix metallopeptidase 10	0	0	0	0	2.005236078	0	0	0	0	0.50130902	0.50130902	0.561529182	0.965516704
ENSMUSG00000057691	Zfp746	zinc finger protein 746	9.798971163	9.792373268	10.00109765	9.892945925	9.91235697	9.906566659	9.918958517	9.954020076	9.871347002	9.922975555	0.051628553	0.556708693	0.965516704
ENSMUSG00000057696	Rpl30-ps1	ribosomal protein L30, pseudogene 1	1.645576219	0	0.899492338	0	1.58961773	1.809634363	1.078314528	0	0.636267139	1.119391655	0.483124516	0.624098305	0.969741274
ENSMUSG00000053338	Tarm1	T cell-interacting, activating receptor on myeloid cells 1	1.645576219	0	1.846484642	0	0	0	0	0	0.873015215	0	-0.873015215	0.415917878	0.934081381
ENSMUSG00000085403	Gm13068	predicted gene 13068	2.884829173	1.635246308	1.449333651	1.639366891	2.590779194	0.875920088	2.115933218	2.312514971	1.902194006	1.973786868	0.071592862	0.927499754	0.9978586
ENSMUSG00000085407	1700095J03Rik	RIKEN cDNA 1700095J03 gene	3.079044871	2.64754811	2.41333609	0	3.328209112	2.775313294	4.14351718	4.236773674	2.034982268	3.620953315	1.585971047	0.034749493	0.296182599
ENSMUSG00000085408	C530005A16Rik	RIKEN cDNA C530005A16 gene	7.327818446	6.944525096	7.167845228	7.135547185	7.136210522	7.940796242	7.611204507	7.363334627	7.143933989	7.512886474	0.368952486	0.039491913	0.318489606
ENSMUSG00000053332	Gas5	growth arrest specific 5	10.30666413	10.20142269	9.892321465	10.32038958	10.64087625	10.13375793	10.14113802	10.42494404	10.18019946	10.33517906	0.154979597	0.234437879	0.766597376
ENSMUSG00000053333	Dis3l2	DIS3 like 3-5 exoribonuclease 2	9.411783359	9.252077065	9.413791321	9.280394699	9.366716189	9.442670244	9.3046262	9.278261702	9.339511611	9.348068584	0.008556973	0.926279577	0.9978586
ENSMUSG00000053334	Ficd	FIC domain containing	8.864579449	8.792286707	8.695804981	8.70270832	8.817533356	8.683248882	8.432900957	8.712765773	8.763844864	8.661612242	-0.102232622	0.400806511	0.925901209
ENSMUSG00000109977	Gm19140	predicted gene, 19140	1.645576219	0	0	1.040994419	1.003492829	2.117931851	0	0	0.671642659	0.78035617	0.108713511	0.821922234	0.973353259
ENSMUSG00000109975	Gm19196	predicted gene, 19196	4.944961085	4.715721513	4.885501747	3.394899473	5.29220096	4.607921302	5.318492948	5.688891056	4.485270954	5.226876566	0.741605612	0.076705213	0.45825012
ENSMUSG00000109970	Gm17995	predicted gene, 17995	0	0	0	0	0	0	0	1.991176999	0	0.49779425	0.49779425	0.56486706	0.965516704
ENSMUSG00000038845	Phb	prohibitin	10.02506752	10.46919195	10.36619544	10.52891611	10.4184831	10.4215676	10.41574724	10.19402723	10.34734276	10.36245629	0.015113537	0.961194236	0.9978586
ENSMUSG00000038844	Kif16b	kinesin family member 16B	8.726396988	8.771575307	8.777739211	8.665613804	8.599416228	8.638598023	8.946685563	9.057024264	8.735331328	8.81043102	0.075099692	0.49545681	0.965516704
ENSMUSG00000105127	Gm42470	predicted gene 42470	0	0	0	1.040994419	0	0	0	0	0.260248605	0	-0.260248605	0.830018289	0.973353259
ENSMUSG00000038840	Birc7	baculoviral IAP repeat-containing 7 (livin)	0	1.635246308	0	2.386971434	2.590779194	1.809634363	0	1.577122502	1.005554435	1.494384015	0.488829579	0.683951318	0.969741274
ENSMUSG00000038843	Gcnt1	glucosaminyl (N-acetyl) transferase 1, core 2	6.87055797	5.854817447	6.521490409	6.454947835	6.310669862	6.029203605	7.866151682	7.729746205	6.425453415	6.983942839	0.558489423	0.046476477	0.346943205
ENSMUSG00000076271	Mir697	microRNA 697	1.645576219	1.635246308	2.41333609	2.061062922	1.003492829	2.117931851	1.688464829	2.575155827	1.938805384	1.846261334	-0.09254405	0.975358358	0.9978586
ENSMUSG00000038848	Ythdf1	YTH domain family 1	10.97564185	10.77257588	10.91244138	10.8256441	10.62810892	10.91956568	10.7393415	10.47305511	10.8715758	10.6900178	-0.181558002	0.094514303	0.507651834
ENSMUSG00000110246	C130073E24Rik	RIKEN cDNA C130073E24 gene	0	2.05644782	0	0	2.005236078	0	0	2.797267076	0.514111955	1.200625788	0.686513833	0.475133238	0.962049416
ENSMUSG00000110247	Gm45269	predicted gene 45269	0	2.382061721	0	0	0	0	2.115933218	0	0.59551543	0.528983305	-0.066532126	0.901632368	0.989380686
ENSMUSG00000110244	Gm2253	predicted gene 2253	1.645576219	2.05644782	0	0	1.003492829	0	0	0.994123999	0.92550601	0.499404207	-0.426101803	0.542258268	0.965516704
ENSMUSG00000110245	Gm20100	predicted gene, 20100	0	0	0.899492338	0	0	0	0	1.991176999	0.224873085	0.49779425	0.272921165	0.712447741	0.970687309
ENSMUSG00000110242	G630064G18Rik	RIKEN cDNA G630064G18 gene	0	0	0	0	0	1.809634363	0	1.577122502	0	0.846689216	0.846689216	0.44560131	0.95243028
ENSMUSG00000110243	Gm45631	predicted gene 45631	0	2.05644782	3.135647341	2.876933903	3.328209112	3.22524116	1.688464829	3.988962792	2.017257266	3.057719473	1.040462207	0.238942141	0.772514246
ENSMUSG00000110240	Gm45486	predicted gene 45486	2.394364844	0	0	2.386971434	1.58961773	2.117931851	0	2.575155827	1.195334069	1.570676352	0.375342283	0.827413253	0.973353259
ENSMUSG00000064596	Gm22298	predicted gene, 22298	1.04569736	0	0	0	1.58961773	0	0	0	0.26142434	0.397404432	0.135980093	0.833734401	0.973353259
ENSMUSG00000064595	Gm22300	predicted gene, 22300	0	2.382061721	0	0	0	0	0	0	0.59551543	0	-0.59551543	0.462442173	0.956861716
ENSMUSG00000064590	Gm22301	predicted gene, 22301	0	0	0	0	0	0	1.078314528	0.994123999	0	0.518109632	0.518109632	0.678216137	0.969741274
ENSMUSG00000110249	9330121K16Rik	RIKEN cDNA 9330121K16 gene	11.58681518	10.76822635	11.19614695	11.00859368	10.45818336	10.751521	10.77729961	10.35455514	11.13994554	10.58538978	-0.554555763	0.0002999	0.011717004
ENSMUSG00000076867	Trdv4	T cell receptor delta variable 4	0	1.635246308	0	0	0	0	1.078314528	0	0.408811577	0.269578632	-0.139232945	0.816860842	0.973353259
ENSMUSG00000102825	Gm36990	predicted gene, 36990	0	0	0.899492338	0	0	1.809634363	1.688464829	0	0.224873085	0.874524798	0.649651713	0.474073714	0.961155549
ENSMUSG00000018362	Kpna2	karyopherin (importin) alpha 2	9.120491902	9.011272602	9.201175651	8.822139344	9.02098423	8.697830599	9.050137721	8.814798498	9.038769874	8.895937762	-0.142832112	0.240200983	0.773997112
ENSMUSG00000018363	Smurf2	SMAD specific E3 ubiquitin protein ligase 2	10.32473662	10.23836954	9.996216072	10.21521245	10.22250437	10.17915277	10.05481966	10.37517304	10.19363367	10.20791246	0.014278792	0.883505575	0.982813574
ENSMUSG00000114696	AC126549.2	---	0	2.05644782	0	0	0	0	0	0	0.514111955	0	-0.514111955	0.541846636	0.965516704
ENSMUSG00000016018	Skiv2l2	superkiller viralicidic activity 2-like 2 (S. cerevisiae)	10.87621181	10.71859404	10.85090439	10.72195545	10.7475972	10.91333156	10.63328473	10.58907369	10.79191642	10.7208218	-0.071094626	0.472095291	0.960010301
ENSMUSG00000066571	4931406P16Rik	RIKEN cDNA 4931406P16 gene	10.33190269	10.45518979	10.19782513	10.59847184	10.16558082	10.58736771	10.32739628	10.61394029	10.39584736	10.42357128	0.027723912	0.789978141	0.973353259
ENSMUSG00000103439	Gm7019	predicted pseudogene 7019	0	0	1.449333651	0	1.003492829	1.809634363	0	0	0.362333413	0.703281798	0.340948385	0.752444718	0.973353259
ENSMUSG00000103435	Gm36992	predicted gene, 36992	0	0	0	0	0	0	0	0.994123999	0	0.248531	0.248531	0.846512451	0.973353259
ENSMUSG00000103434	Gm36993	predicted gene, 36993	1.645576219	2.64754811	2.630511888	0	0	3.66590362	2.939114924	1.991176999	1.730909054	2.149048886	0.418139831	0.491922573	0.965516704
ENSMUSG00000103436	Gm36995	predicted gene, 36995	9.321067598	9.140736619	9.184106065	9.862126445	9.133669244	9.236405119	9.628125908	9.523515279	9.377009182	9.380428888	0.003419706	0.937903364	0.9978586
ENSMUSG00000103430	Gm36996	predicted gene, 36996	1.645576219	0	0	0	1.003492829	1.417032207	0	1.577122502	0.411394055	0.999411885	0.58801783	0.604056305	0.969741274
ENSMUSG00000103433	Gm2272	predicted gene 2272	2.66033993	0	0	2.652653363	2.005236078	0	0	0	1.328248323	0.50130902	-0.826939304	0.375889023	0.911822278
ENSMUSG00000103432	6720464F23Rik	RIKEN cDNA 6720464F23 gene	0	0	0	0	0	2.37180711	0	0	0	0.592951777	0.592951777	0.466685004	0.957642267
ENSMUSG00000064621	Gm26922	predicted gene, 26922	1.04569736	1.037876205	0.899492338	1.040994419	1.003492829	0.875920088	1.078314528	0.994123999	1.00601508	0.987962861	-0.018052219	0.981393144	0.9978586
ENSMUSG00000064624	Gm22305	predicted gene, 22305	0	0	0	0	0	0	0	0.994123999	0	0.248531	0.248531	0.846512451	0.973353259
ENSMUSG00000053593	Fate1	fetal and adult testis expressed 1	0	3.389405204	0	2.386971434	1.003492829	2.37180711	2.115933218	1.577122502	1.444094159	1.767088915	0.322994755	0.772418898	0.973353259
ENSMUSG00000033214	Slitrk5	SLIT and NTRK-like family, member 5	11.38744643	11.28603261	11.45641556	11.10457267	11.16495263	11.26136232	11.14262864	11.13670576	11.30861682	11.17641234	-0.132204483	0.125672656	0.580890537
ENSMUSG00000020349	Ppp2ca	protein phosphatase 2 (formerly 2A), catalytic subunit, alpha isoform	13.33404906	13.37869961	13.47840998	13.24166435	13.25934628	13.41932769	13.2418642	13.12873555	13.35820575	13.26231843	-0.095887321	0.283425919	0.832232336
ENSMUSG00000026955	Sapcd2	suppressor APC domain containing 2	3.891101417	5.160101171	4.705805117	3.775234473	5.650694198	5.069184272	5.396707736	5.76979865	4.383060545	5.471596214	1.08853567	0.005464945	0.091282599
ENSMUSG00000054648	Zfp869	zinc finger protein 869	9.425246885	8.82615836	9.539908518	8.680566257	8.724637113	9.75165892	8.883574145	9.519621406	9.117970005	9.219872896	0.101902891	0.713880884	0.971440416
ENSMUSG00000107534	Gm43920	predicted gene, 43920	0	0	1.846484642	0	0	1.417032207	0	0	0.46162116	0.354258052	-0.107363109	0.882074359	0.982236649
ENSMUSG00000054641	Mmrn1	multimerin 1	0	2.05644782	0	2.061062922	0	0	0	0	1.029377686	0	-1.029377686	0.287546532	0.836579106
ENSMUSG00000107539	Gm44790	predicted gene 44790	3.783704699	0	3.135647341	0	3.813834889	3.090278098	3.30634127	3.895902629	1.72983801	3.526589222	1.796751212	0.227350565	0.755320008
ENSMUSG00000070464	Ccl26	chemokine (C-C motif) ligand 26	0	0	0	0	0	0	0	1.577122502	0	0.394280625	0.394280625	0.681264798	0.969741274
ENSMUSG00000037001	Zfp39	zinc finger protein 39	8.451670162	7.993345458	7.781022563	7.821955589	8.296973832	8.287811333	8.327020414	8.292042133	8.011998443	8.300961928	0.288963485	0.088287272	0.491391406
ENSMUSG00000103772	Gm36933	predicted gene, 36933	0	0	0	0	2.32751257	0	0	0	0	0.581878143	0.581878143	0.480841209	0.963614476
ENSMUSG00000070462	Tlnrd1	talin rod domain containing 1	10.48438946	10.33916675	10.52460194	10.50286354	10.59099563	10.85207219	10.3373468	9.927815222	10.46275542	10.42705746	-0.035697963	0.988809599	0.9978586
ENSMUSG00000110862	CT025619.2	---	3.541470204	3.389405204	3.71322647	2.652653363	4.176515485	4.145967774	3.841853679	4.310743152	3.32418881	4.118770022	0.794581212	0.083404656	0.478138763
ENSMUSG00000110863	AC163350.2	---	5.33562142	3.876923321	4.657152062	4.885399987	5.216242458	5.032839998	5.434280405	5.076034537	4.688774198	5.18984935	0.501075152	0.213302273	0.736623233
ENSMUSG00000048387	Osr1	odd-skipped related 1 (Drosophila)	5.81626502	6.203024925	5.496202907	5.471300104	4.094030572	5.238322067	5.931320395	5.919155131	5.746698239	5.295707041	-0.450991198	0.380931054	0.914837849
ENSMUSG00000033253	Szt2	seizure threshold 2	11.37651442	11.62886832	11.51731331	11.80064938	11.31645083	11.34665233	11.39332736	11.63793291	11.58083636	11.42359086	-0.157245498	0.142988341	0.617383986
ENSMUSG00000103771	Gm36934	predicted gene, 36934	0	1.037876205	0	0	0	0	0	0	0.259469051	0	-0.259469051	0.830018289	0.973353259
ENSMUSG00000033255	Gm5134	predicted gene 5134	0	2.382061721	1.449333651	2.652653363	0	1.417032207	2.445268757	0	1.621012184	0.965575241	-0.655436943	0.544460606	0.965516704
ENSMUSG00000048388	Fam171b	family with sequence similarity 171, member B	13.57102653	13.57325238	13.53399114	13.421255	13.41198505	13.4547445	13.63501306	13.55201705	13.52488126	13.51343991	-0.011441349	0.897301188	0.988036188
ENSMUSG00000033257	Ttll4	tubulin tyrosine ligase-like family, member 4	9.023503821	9.183175826	9.590988214	10.00558769	8.96406526	8.869947151	8.859608539	9.593718663	9.450813888	9.071834903	-0.378978985	0.061348416	0.406527183
ENSMUSG00000033256	Shf	Src homology 2 domain containing F	9.351944336	9.315454269	9.546601963	9.485881571	9.194317357	9.53489226	9.317250501	9.266692465	9.424970535	9.328288146	-0.096682389	0.38147758	0.914837849
ENSMUSG00000021959	Lats2	large tumor suppressor 2	10.16538988	10.13811037	10.01564406	10.23053399	9.90783675	9.907821507	9.559650356	9.314671871	10.13741957	9.672495121	-0.464924453	0.000800086	0.023980056
ENSMUSG00000021958	Pinx1	PIN2/TERF1 interacting, telomerase inhibitor 1	7.524115435	6.828995947	7.031344673	6.694763342	7.390639836	7.241573845	7.173849381	6.895213094	7.019804849	7.175319039	0.15551419	0.525115016	0.965516704
ENSMUSG00000021951	Eef1akmt1	eukaryotic translation elongation factor 1 alpha lysine methyltransferase 1	8.177133648	8.283990536	8.063643761	8.388947047	8.364508007	8.692015586	8.487537845	8.096791264	8.228428748	8.410213176	0.181784428	0.18258356	0.688327299
ENSMUSG00000021950	Anxa8	annexin A8	3.891101417	2.05644782	1.449333651	2.652653363	3.006106913	2.941373951	1.688464829	3.796423229	2.512384063	2.85809223	0.345708168	0.719844063	0.973138888
ENSMUSG00000021953	Tdh	L-threonine dehydrogenase	2.66033993	3.06564474	0	0	0	1.809634363	0	0	1.431496167	0.452408591	-0.979087577	0.256070709	0.793262522
ENSMUSG00000037007	Zfp113	zinc finger protein 113	7.573319894	7.651830618	7.874431537	7.861858339	8.023758636	7.66019507	8.146381337	7.907136064	7.740360097	7.934367777	0.19400768	0.191522076	0.702893981
ENSMUSG00000021957	Tkt	transketolase	11.83059014	11.79671544	11.97947347	11.76777041	11.85207329	11.74022531	11.91493622	11.95941118	11.84363736	11.8666615	0.023024138	0.780598698	0.973353259
ENSMUSG00000116165	---	---	11.91413074	12.14220078	12.33983254	12.09555502	12.12234449	12.13948643	12.30579941	12.03977559	12.12292977	12.15185148	0.028921714	0.814385916	0.973353259
ENSMUSG00000116164	---	---	2.068014459	3.769606182	1.846484642	3.394899473	2.813337462	3.84427012	3.598803161	3.689572954	2.769751189	3.486495924	0.716744736	0.334189879	0.877914407
ENSMUSG00000116160	---	---	0	0	0	0	0	0	0	1.577122502	0	0.394280625	0.394280625	0.681264798	0.969741274
ENSMUSG00000090981	Olfr718-ps1	olfactory receptor 718, pseudogene 1	1.645576219	0	0	0	2.005236078	0	0	0	0.411394055	0.50130902	0.089914965	0.875985479	0.98106821
ENSMUSG00000071073	Lrrc73	leucine rich repeat containing 73	9.316258125	9.775135523	9.602276265	9.507006548	9.56921044	9.242385646	9.4944474	9.397632291	9.550169115	9.425918944	-0.124250171	0.275170225	0.8213951
ENSMUSG00000071072	Ptges3	prostaglandin E synthase 3	11.27482945	11.26210422	11.45774783	11.15362212	11.19122973	11.3613823	11.24462595	11.27824754	11.28707591	11.26887138	-0.018204529	0.802385352	0.973353259
ENSMUSG00000100160	Gm28527	predicted gene 28527	0	0	1.846484642	1.040994419	1.003492829	0	1.078314528	0.994123999	0.721869765	0.768982839	0.047113074	0.888865277	0.985009034
ENSMUSG00000100166	B230110G15Rik	RIKEN cDNA B230110G15 gene	3.250190284	0	0	0	0	1.809634363	0	0	0.812547571	0.452408591	-0.36013898	0.503283423	0.965516704
ENSMUSG00000100164	2610306M01Rik	RIKEN cDNA 2610306M01 gene	5.946467619	6.182251265	6.494050318	6.437448847	7.040347091	6.510949831	6.837689855	6.646552516	6.265054512	6.758884823	0.493830311	0.019755271	0.207703644
ENSMUSG00000071074	Yipf3	Yip1 domain family, member 3	10.48009553	10.53825616	10.58843171	10.473115	10.61337797	10.49102802	10.36922004	10.42598456	10.5199746	10.47490265	-0.045071952	0.594917549	0.969741274
ENSMUSG00000019102	Aldh3a1	aldehyde dehydrogenase family 3, subfamily A1	3.891101417	5.242682586	5.350809624	3.882583475	3.913403719	2.775313294	5.318492948	3.574171483	4.591794276	3.895345361	-0.696448915	0.295240978	0.843893418
ENSMUSG00000030058	Copg1	coatomer protein complex, subunit gamma 1	12.96092255	12.99065335	13.18700975	13.07183673	12.93863723	13.22361859	12.98961262	12.81338315	13.0526056	12.9913129	-0.061292697	0.577729746	0.969741274
ENSMUSG00000036555	Iqce	IQ motif containing E	10.29204135	10.19754603	10.2693704	10.39594393	10.23699186	10.18640929	10.48899043	10.46295222	10.28872543	10.34383595	0.055110526	0.543512959	0.965516704
ENSMUSG00000036557	Stpg4	sperm tail PG rich repeat containing 4	0	2.382061721	0	0	0	0	0	0	0.59551543	0	-0.59551543	0.462442173	0.956861716
ENSMUSG00000036551	Akap14	A kinase (PRKA) anchor protein 14	2.66033993	0	2.157573411	2.061062922	0	3.462332101	0	1.991176999	1.719744066	1.363377275	-0.356366791	0.913529159	0.994741447
ENSMUSG00000036550	Cnot1	CCR4-NOT transcription complex, subunit 1	11.7215959	11.88694044	11.8947936	11.66061773	11.7408379	11.63769777	11.49517041	11.52350333	11.79098692	11.59930235	-0.191684564	0.030918986	0.276297321
ENSMUSG00000036553	Sh3tc1	SH3 domain and tetratricopeptide repeats 1	6.481270036	6.377641345	6.253433838	6.925662221	6.788273659	6.510949831	6.320508314	6.821217698	6.50950186	6.610237376	0.100735516	0.655871701	0.969741274
ENSMUSG00000036552	Ermard	ER membrane associated RNA degradation	8.21896299	8.405473932	8.335088022	8.361374	8.632668445	8.626453986	8.522845736	8.678250568	8.330224736	8.615054684	0.284829948	0.006401709	0.101496859
ENSMUSG00000091587	Gm17191	predicted gene 17191	1.645576219	1.635246308	0	0	0	1.417032207	0	0	0.820205632	0.354258052	-0.46594758	0.664188287	0.969741274
ENSMUSG00000091586	Cyp4f17	cytochrome P450, family 4, subfamily f, polypeptide 17	6.830642994	6.263609283	6.561696105	6.07962694	6.877282451	5.20604375	6.626701381	6.397754005	6.43389383	6.276945396	-0.156948434	0.825495801	0.973353259
ENSMUSG00000055994	Nod2	nucleotide-binding oligomerization domain containing 2	4.944961085	0	4.606800808	5.078396742	5.176708868	5.331037707	4.902110306	4.44819295	3.657539659	4.964512457	1.306972799	0.379610101	0.913918903
ENSMUSG00000055991	Zkscan5	zinc finger with KRAB and SCAN domains 5	8.632789494	8.829502194	8.751907201	8.676842647	8.390660676	8.751934727	8.474071381	8.733085366	8.722760384	8.587438038	-0.135322346	0.2893668	0.838712242
ENSMUSG00000108751	Gm45217	predicted gene 45217	0	0	0	0	0	2.117931851	3.134381001	0	0	1.313078213	1.313078213	0.100967646	0.523706088
ENSMUSG00000108750	Gm44750	predicted gene 44750	0	2.05644782	0	0	0	0	2.115933218	0	0.514111955	0.528983305	0.014871349	0.983812272	0.9978586
ENSMUSG00000108753	Gm45094	predicted gene 45094	3.667665513	4.393062975	3.71322647	3.982495002	3.465775941	3.348651568	3.134381001	3.311334	3.93911249	3.315035628	-0.624076862	0.143248092	0.617986094
ENSMUSG00000108752	Gm45191	predicted gene 45191	0	0	0	2.061062922	0	1.809634363	0	0	0.51526573	0.452408591	-0.06285714	0.925876612	0.9978586
ENSMUSG00000033213	AA467197	expressed sequence AA467197	3.250190284	2.64754811	3.973791331	2.652653363	2.005236078	1.417032207	2.115933218	1.577122502	3.131045772	1.778831001	-1.352214771	0.023387492	0.231426754
ENSMUSG00000023084	Lrrc71	leucine rich repeat containing 71	6.238509417	5.430556792	5.118981298	4.469424261	5.498675636	1.809634363	5.641227527	6.054489627	5.314367942	4.751006788	-0.563361154	0.91161496	0.993674004
ENSMUSG00000023087	Noct	nocturnin	11.04994972	10.83795384	10.8770305	9.682525674	10.82635416	9.369871868	10.97428984	10.76548602	10.61186493	10.48400047	-0.12786446	0.828841313	0.973353259
ENSMUSG00000047875	Gpr157	G protein-coupled receptor 157	6.703810928	6.516888973	6.700213941	6.808034541	6.734832012	6.902016782	6.508380901	7.043595303	6.682237096	6.79720625	0.114969154	0.485563821	0.96493119
ENSMUSG00000030788	Rnf141	ring finger protein 141	10.76765797	10.81114261	10.87237591	10.74969277	11.03280555	11.02682754	10.75055494	11.11364273	10.80021731	10.98095769	0.180740377	0.041417646	0.326674389
ENSMUSG00000030789	Itgax	integrin alpha X	3.403168963	1.635246308	0	3.070993449	3.591359576	0	3.134381001	4.076382183	2.02735218	2.70053069	0.67317851	0.406256923	0.926729149
ENSMUSG00000030786	Itgam	integrin alpha M	9.294414855	9.002411708	8.836273797	9.258139813	9.292368287	9.528380403	9.767121001	9.982588996	9.097810044	9.642614672	0.544804628	0.000352545	0.013069944
ENSMUSG00000097292	A230107N01Rik	RIKEN cDNA A230107N01 gene	5.732101874	5.160101171	5.255976772	5.664179491	6.273673366	5.744597631	5.822179139	5.716367503	5.453089827	5.88920441	0.436114583	0.091514781	0.499598396
ENSMUSG00000097291	Gm18828	predicted gene, 18828	0	0	0	0	0	0	1.688464829	0	0	0.422116207	0.422116207	0.668370292	0.969741274
ENSMUSG00000097290	1300002E11Rik	RIKEN cDNA 1300002E11 gene	7.507333822	7.213817794	7.436432405	7.250234931	8.073040442	7.79107835	6.865461649	7.527446347	7.351954738	7.564256697	0.212301959	0.216629545	0.740820128
ENSMUSG00000030782	Tgfb1i1	transforming growth factor beta 1 induced transcript 1	8.867869973	9.088662901	9.084134232	8.481502867	8.518710807	8.787817829	8.946685563	9.101987476	8.880542493	8.838800419	-0.041742074	0.768795389	0.973353259
ENSMUSG00000023088	Abcc1	ATP-binding cassette, sub-family C (CFTR/MRP), member 1	9.384473408	9.407825758	9.707566423	9.586559479	9.915362601	9.847630984	9.752322095	9.714456086	9.521606267	9.807442942	0.285836675	0.005990049	0.097155679
ENSMUSG00000030780	BC017158	cDNA sequence BC017158	8.993691286	9.146110296	9.281614782	9.447059158	9.250139721	9.073752505	9.584928196	9.325864144	9.217118881	9.308671142	0.091552261	0.49521434	0.965516704
ENSMUSG00000107478	Gm45234	predicted gene 45234	1.04569736	1.635246308	2.157573411	2.061062922	2.32751257	2.117931851	1.688464829	2.312514971	1.724895	2.111606055	0.386711055	0.630470249	0.969741274
ENSMUSG00000091639	Gm3756	predicted gene 3756	7.346809105	7.582177556	7.723111394	7.650297785	7.984229526	7.413976133	7.535432815	7.65361813	7.57559896	7.646814151	0.071215191	0.635241607	0.969741274
ENSMUSG00000033788	Dysf	dysferlin	7.055077764	7.378102821	7.606232848	7.260222787	7.156675325	7.233589784	7.535432815	7.864791228	7.324909055	7.447622288	0.122713233	0.49565468	0.965516704
ENSMUSG00000091636	Akain1	A kinase (PRKA) anchor inhibitor 1	7.228924066	6.828995947	7.392523727	7.260222787	6.77509769	7.356317545	7.249570607	7.4721058	7.177666632	7.21327291	0.035606278	0.823510617	0.973353259
ENSMUSG00000096810	Gm10481	predicted gene 10481	2.068014459	1.635246308	1.449333651	1.639366891	1.58961773	1.417032207	1.078314528	2.989701238	1.697990327	1.768666426	0.070676098	0.729782345	0.973353259
ENSMUSG00000109351	Gm44632	predicted gene 44632	2.66033993	2.8716894	0	2.876933903	1.58961773	2.587621499	2.939114924	2.312514971	2.102240808	2.357217281	0.254976473	0.991700137	0.9978586
ENSMUSG00000049265	Kcnk3	potassium channel, subfamily K, member 3	9.95098468	10.18976133	10.13370231	10.40272275	9.333395868	9.823897518	9.792659334	9.759726965	10.16929277	9.677419921	-0.491872848	0.000187599	0.008136095
ENSMUSG00000060621	Nkpd1	NTPase, KAP family P-loop domain containing 1	3.250190284	4.930249163	5.628275788	4.246406016	4.398963161	4.749025824	4.731512262	5.23646261	4.513780313	4.778990964	0.265210652	0.930504381	0.9978586
ENSMUSG00000038067	Csf3	colony stimulating factor 3 (granulocyte)	0	1.635246308	5.118981298	2.652653363	5.006759695	4.793151955	5.235793501	4.632553048	2.351720242	4.917064549	2.565344307	0.182281933	0.68779923
ENSMUSG00000038065	Mturn	maturin, neural progenitor differentiation regulator homolog (Xenopus)	11.84610566	12.13208118	12.18274015	12.28173799	11.95643744	12.1029756	12.06095082	12.22334313	12.11066625	12.08592675	-0.024739497	0.768875793	0.973353259
ENSMUSG00000105265	Sox2ot	SOX2 overlapping transcript (non-protein coding)	7.507333822	8.040276144	7.593360494	7.03441813	8.201710322	8.171433381	7.509264656	7.959814628	7.543847147	7.960555747	0.416708599	0.06139762	0.406600005
ENSMUSG00000105263	Gm42427	predicted gene 42427	5.373155087	4.715721513	5.255976772	5.436488963	4.864718185	4.749025824	4.902110306	5.346064338	5.195335583	4.965479663	-0.22985592	0.422377134	0.93752711
ENSMUSG00000038060	Dlec1	deleted in lung and esophageal cancer 1	6.64365203	6.673944726	6.378752606	6.975012927	6.925782935	6.696646378	6.127575499	7.158231078	6.667840572	6.727058973	0.0592184	0.682114665	0.969741274
ENSMUSG00000097745	AI115009	expressed sequence AI115009	3.991054272	5.282265739	6.451886068	5.436488963	4.176515485	4.703507358	5.434280405	5.414763677	5.29042376	4.932266731	-0.358157029	0.246537834	0.78190728
ENSMUSG00000116831	---	---	2.068014459	2.64754811	2.41333609	0	0	0	2.115933218	0	1.782224665	0.528983305	-1.25324136	0.229152628	0.758126499
ENSMUSG00000116830	---	---	2.068014459	0	0	1.040994419	0	0	0	0	0.77725222	0	-0.77725222	0.460289242	0.956861716
ENSMUSG00000097740	E030044B06Rik	RIKEN cDNA E030044B06 gene	0	0	2.986096998	2.061062922	3.591359576	0	3.134381001	2.312514971	1.26178998	2.259563887	0.997773907	0.371310382	0.909192036
ENSMUSG00000116835	---	---	7.996518627	8.028685818	8.030602294	7.932264691	8.040373658	8.040267397	8.058882991	8.021692098	7.997017858	8.040304036	0.043286178	0.707099874	0.96988229
ENSMUSG00000037202	Prf1	perforin 1 (pore forming protein)	0	0	0	0	0	0	0	2.989701238	0	0.74742531	0.74742531	0.339144876	0.881053508
ENSMUSG00000087390	Gm7598	predicted gene 7598	4.172313377	3.653659897	3.271140962	2.876933903	4.254538354	4.877550687	2.939114924	5.076034537	3.493512035	4.286809626	0.793297591	0.063986456	0.416571012
ENSMUSG00000037206	Islr	immunoglobulin superfamily containing leucine-rich repeat	8.089650756	8.068851013	8.158456762	7.868402803	8.191828647	8.455079055	8.930343111	9.178068772	8.046340333	8.688829896	0.642489563	0.000359109	0.013221171
ENSMUSG00000030255	Sspn	sarcospan	8.171818664	8.129791833	7.656603585	7.950884735	8.625345014	8.395498148	8.239526246	8.535150042	7.977274704	8.448879863	0.471605158	0.001459999	0.036437199
ENSMUSG00000037204	Atg101	autophagy related 101	8.80058979	9.046181772	9.253252464	9.307137003	9.221284626	8.920555698	8.852687459	8.772885624	9.101790257	8.941853352	-0.159936905	0.244573097	0.779819524
ENSMUSG00000030257	Srgap3	SLIT-ROBO Rho GTPase activating protein 3	13.78041954	13.81613973	13.94327648	13.91611163	13.65914944	13.66952494	13.73449075	13.83430276	13.86398684	13.72436697	-0.139619875	0.070398864	0.438635339
ENSMUSG00000030259	Rassf8	Ras association (RalGDS/AF-6) domain family (N-terminal) member 8	9.13695057	9.249582991	8.857962528	9.133276049	9.159249833	9.162635547	9.302088029	9.386985176	9.094443034	9.252739646	0.158296612	0.16677731	0.662990296
ENSMUSG00000087298	Gm9392	predicted pseudogene 9392	6.042780076	5.74577905	5.154468919	5.166004367	5.328731298	5.552585985	5.358130323	5.988408708	5.527258103	5.556964078	0.029705975	0.972943562	0.9978586
ENSMUSG00000031785	Adgrg1	adhesion G protein-coupled receptor G1	11.2211666	11.54134399	11.13805469	11.45966327	11.3378914	10.81040917	11.4181521	11.41501716	11.34005714	11.24536746	-0.094689681	0.549635341	0.965516704
ENSMUSG00000031787	Katnb1	katanin p80 (WD40-containing) subunit B 1	10.24093139	10.42456165	10.50067263	10.44930307	10.42060005	10.47925907	10.35704429	10.3101613	10.40386719	10.39176618	-0.012101007	0.869965888	0.979068192
ENSMUSG00000031786	Drc7	dynein regulatory complex subunit 7	3.403168963	4.656706109	4.1944172	4.936123083	5.29220096	3.348651568	3.30634127	4.689118391	4.297603839	4.159078047	-0.138525791	0.99205745	0.997885247
ENSMUSG00000031781	Ciapin1	cytokine induced apoptosis inhibitor 1	10.23711958	10.44650504	10.49981063	10.58958728	10.50482425	10.36969216	10.43903769	10.18175942	10.44325563	10.37382838	-0.069427254	0.495816825	0.965516704
ENSMUSG00000031780	Ccl17	chemokine (C-C motif) ligand 17	3.250190284	4.826969182	3.973791331	4.163686085	2.590779194	3.925812223	3.949570471	3.311334	4.05365922	3.444373972	-0.609285248	0.205459897	0.724351658
ENSMUSG00000031783	Polr2c	polymerase (RNA) II (DNA directed) polypeptide C	9.919618448	10.04193685	9.877797418	9.995159734	9.544186256	9.727700296	9.6077168	9.712751796	9.958628113	9.648088787	-0.310539326	0.00030555	0.01187959
ENSMUSG00000031782	Coq9	coenzyme Q9	10.22818597	10.37850649	10.49029446	10.52166869	10.26553757	10.49437302	10.31360128	10.30564585	10.4046639	10.34478943	-0.059874471	0.515770371	0.965516704
ENSMUSG00000031789	Cngb1	cyclic nucleotide gated channel beta 1	0	1.635246308	2.819232083	2.386971434	3.006106913	0	3.459970513	2.575155827	1.710362456	2.260308313	0.549945857	0.466348367	0.957642267
ENSMUSG00000031788	Kifc3	kinesin family member C3	10.38109266	10.61292332	10.71043392	10.71924267	10.48067808	10.52167728	10.72898538	10.76630783	10.60592314	10.62441214	0.018488999	0.872524177	0.979908934
ENSMUSG00000034254	Agpat1	1-acylglycerol-3-phosphate O-acyltransferase 1 (lysophosphatidic acid acyltransferase, alpha)	12.00398031	11.74939477	11.95798055	11.80705104	11.96044443	12.11958761	11.94045747	11.89774515	11.87960167	11.97955867	0.099957	0.25375305	0.791435528
ENSMUSG00000070858	Gm1673	predicted gene 1673	7.356211507	8.057488891	8.18014169	7.881403335	8.166824223	8.20856541	7.838393296	7.864791228	7.868811356	8.019643539	0.150832183	0.480636028	0.963614476
ENSMUSG00000118479	---	---	0	0	1.846484642	2.386971434	0	0	0	0.994123999	1.058364019	0.248531	-0.809833019	0.294665334	0.843314204
ENSMUSG00000040770	Il25	interleukin 25	2.66033993	3.06564474	1.846484642	0	2.32751257	1.417032207	0	0	1.893117328	0.936136194	-0.956981133	0.308169741	0.855799126
ENSMUSG00000083627	Gm12502	predicted gene 12502	0	0	0	0	0	0	0	1.577122502	0	0.394280625	0.394280625	0.681264798	0.969741274
ENSMUSG00000105120	Gm26413	predicted gene, 26413	1.04569736	1.037876205	0.899492338	1.040994419	1.003492829	0.875920088	1.078314528	0.994123999	1.00601508	0.987962861	-0.018052219	0.981393144	0.9978586
ENSMUSG00000090213	Tmem189	transmembrane protein 189	10.03827051	10.23206652	9.920938129	10.33227399	10.21885965	10.16662746	9.97261464	10.3976236	10.13088729	10.18893134	0.058044048	0.627235626	0.969741274
ENSMUSG00000090210	Itga10	integrin, alpha 10	7.532433602	7.525578006	7.687214987	7.868402803	7.490754115	7.233589784	7.15146415	7.22670701	7.65340735	7.275628765	-0.377778585	0.012326947	0.154385759
ENSMUSG00000090211	Gm16050	predicted gene 16050	0	0	0	0	0	0	0	1.991176999	0	0.49779425	0.49779425	0.56486706	0.965516704
ENSMUSG00000031125	3830403N18Rik	RIKEN cDNA 3830403N18 gene	0	2.64754811	2.157573411	0	0	0	0	0	1.20128038	0	-1.20128038	0.162238006	0.654311209
ENSMUSG00000090217	Gm16116	predicted gene 16116	0	0	0	0	1.58961773	0	0	1.577122502	0	0.791685058	0.791685058	0.482429853	0.964147298
ENSMUSG00000090215	Trim34b	tripartite motif-containing 34B	0	0	0	0	0	0	0	2.312514971	0	0.578128743	0.578128743	0.484028987	0.964147298
ENSMUSG00000031129	Slc9a9	solute carrier family 9 (sodium/hydrogen exchanger), member 9	9.269750251	9.105311184	9.299557605	9.345170826	9.151623168	9.156314372	9.112307	9.117528098	9.254947466	9.13444316	-0.120504307	0.177663232	0.680385166
ENSMUSG00000034258	Mfsd7c	major facilitator superfamily domain containing 7C	6.531931948	6.182251265	6.408452328	6.664999273	6.77509769	6.861143733	6.690196816	6.795684458	6.446908704	6.780530674	0.333621971	0.071754703	0.442762441
ENSMUSG00000034259	Exosc4	exosome component 4	8.460415397	8.923248246	8.836273797	8.825506623	8.880406495	9.095941514	8.65204169	8.688692108	8.761361016	8.829270452	0.067909436	0.616845087	0.969741274
ENSMUSG00000105482	Gm42596	predicted gene 42596	1.645576219	2.64754811	3.135647341	2.652653363	4.006542134	3.090278098	3.459970513	3.574171483	2.520356258	3.532740557	1.012384299	0.084846062	0.482158857
ENSMUSG00000105481	6430500D05Rik	RIKEN cDNA 6430500D05 gene	0	0	0	2.061062922	0	0	0	1.991176999	0.51526573	0.49779425	-0.017471481	0.978272487	0.9978586
ENSMUSG00000088637	Gm22316	predicted gene, 22316	0	0	0	1.639366891	0	0	0	0.994123999	0.409841723	0.248531	-0.161310723	0.816860842	0.973353259
ENSMUSG00000105484	Gm42775	predicted gene 42775	2.394364844	0	2.630511888	2.061062922	3.328209112	2.941373951	0	3.159462173	1.771484913	2.357261309	0.585776396	0.372891071	0.909758152
ENSMUSG00000105485	Gm42447	predicted gene 42447	0	0	0	0	0	0	0	1.991176999	0	0.49779425	0.49779425	0.56486706	0.965516704
ENSMUSG00000105489	Gm38562	predicted gene, 38562	4.609755403	4.656706109	4.444258039	4.163686085	4.254538354	3.66590362	4.731512262	4.796001121	4.468601409	4.361988839	-0.10661257	0.864853437	0.977320391
ENSMUSG00000034579	Pla2g3	phospholipase A2, group III	7.870954689	8.08012435	7.863751011	8.459998304	7.292334823	7.567957997	7.906812829	8.043550853	8.068707088	7.702664126	-0.366042963	0.063396596	0.414035576
ENSMUSG00000034570	Inpp5j	inositol polyphosphate 5-phosphatase J	10.57576006	10.69770413	10.77241942	10.86708119	10.55579449	10.91458054	11.33988584	10.94242624	10.7282412	10.93817178	0.209930579	0.100614608	0.52332056
ENSMUSG00000034573	Ptpn13	protein tyrosine phosphatase, non-receptor type 13	9.087000329	9.099783075	9.027841031	8.904049737	9.654426971	9.428751181	9.505521264	9.546660362	9.029668543	9.533839944	0.504171401	1.08E-07	2.25E-05
ENSMUSG00000034575	Papd7	PAP associated domain containing 7	10.85564196	10.76473726	10.93174491	10.93646082	10.51674745	10.77921011	10.6868011	10.49305109	10.87214624	10.61895244	-0.253193797	0.005747332	0.094564349
ENSMUSG00000034574	Daam1	dishevelled associated activator of morphogenesis 1	11.25486052	11.16486239	11.20727869	11.13134792	11.0458929	11.08178434	10.97985888	11.20921177	11.18958738	11.07918697	-0.110400406	0.151580056	0.633441988
ENSMUSG00000039662	Icmt	isoprenylcysteine carboxyl methyltransferase	11.22502074	11.48520798	11.48718573	11.58713664	11.2877452	11.59937894	11.29782727	11.12265555	11.44613777	11.32690174	-0.119236036	0.318917203	0.86295344
ENSMUSG00000048602	Morc2b	microrchidia 2B	6.674045027	6.203024925	6.285798755	6.383641151	6.328818311	6.524101517	6.279808786	5.846408813	6.386627464	6.244784357	-0.141843108	0.556794218	0.965516704
ENSMUSG00000048603	Gm9828	predicted gene 9828	6.971895105	6.613158363	6.735792305	6.145771189	6.606818307	6.912056639	6.490657071	7.138054353	6.61665424	6.786896593	0.170242352	0.462773254	0.95721373
ENSMUSG00000039330	Tsga10ip	testis specific 10 interacting protein	0	2.05644782	0	1.639366891	1.003492829	2.117931851	1.078314528	1.577122502	0.923953678	1.444215428	0.52026175	0.718937353	0.972949586
ENSMUSG00000039339	Mfsd4b2	major facilitator superfamily domain containing 4B2	0	0	0	2.061062922	0	0	0	0	0.51526573	0	-0.51526573	0.540781741	0.965516704
ENSMUSG00000043659	Npsr1	neuropeptide S receptor 1	5.673135393	5.430556792	6.061152311	4.83282835	6.77509769	6.524101517	6.7950033	5.346064338	5.499418211	6.360066711	0.8606485	0.008185695	0.119527617
ENSMUSG00000062082	Cd200r4	CD200 receptor 4	4.407550957	3.653659897	3.80541029	4.662538529	0	3.462332101	3.134381001	2.989701238	4.132289918	2.396603585	-1.735686333	0.019257896	0.204359056
ENSMUSG00000028717	Tal1	T cell acute lymphocytic leukemia 1	6.042780076	5.242682586	5.255976772	5.288182697	5.98414666	5.526682889	6.080957431	5.688891056	5.457405533	5.820169509	0.362763976	0.223774422	0.751486539
ENSMUSG00000096206	Gm22317	predicted gene, 22317	1.04569736	0	0	0	1.003492829	0	0	0.994123999	0.26142434	0.499404207	0.237979867	0.835187405	0.973353259
ENSMUSG00000025666	Tmem47	transmembrane protein 47	11.46282375	11.61100608	11.52029175	11.6830657	11.77639987	11.88232585	11.87151382	11.98787459	11.56929682	11.87952853	0.310231714	9.73E-05	0.004915508
ENSMUSG00000025665	Rps6ka6	ribosomal protein S6 kinase polypeptide 6	6.41082874	7.096590504	6.663735945	6.269603094	7.166799885	6.80836817	6.543188415	7.345848068	6.610189571	6.966051135	0.355861564	0.135727773	0.60239579
ENSMUSG00000021179	Nrde2	nrde-2 necessary for RNA interference, domain containing	8.999703282	9.049053097	8.884622814	9.049365923	9.315305275	9.177278132	9.056175378	9.027165435	8.995686279	9.143981055	0.148294776	0.13779883	0.607197496
ENSMUSG00000021178	Psmc1	protease (prosome, macropain) 26S subunit, ATPase 1	11.73607301	11.76038612	11.94790309	11.75678909	11.77433208	11.82303577	11.65089642	11.50146213	11.80028783	11.6874316	-0.112856226	0.231736281	0.762171584
[truncated: 29,921 more rows]
